# Supplementary material for: Transcriptome profiling of neurexin- and neuroligin-deficient Caenorhabditis elegans reveals pathways underlying developmental and behavioral dysfunction
Source: Research Square preprint supplement (doi:10.21203/rs.3.rs-10280322/v1), 2026-07-08
Supplement: Supplementary file 1 [file 01f19d18704318399d562ba9.xlsx]

## Sheet: Fig 1A-BL
Figure 1A		Body Length (BL)																					UNPAIRED T-TEST
											ANOVA RESULTS
			N2 (wildtype)	nrx-1 (ok1649)	nrx-1 (tm1961)	nlg-1 (ok259)	nlg-1 (tm474)				Table Analyzed	Body Length											Table Analyzed	Body Length
Trial 1	1		970.046	921.246	757.832	986.227	1178.76				Data sets analyzed	A, C, D, F, G
	2		800.517	899.631	710.23	892.365	1127.55																Column D	nrx-1 (tm1961)
	3		863.067	1064.29	653.566	982.716	496.384				ANOVA summary												vs.	vs.
	4		975.572	931.604	709.437	945.916	497.162				F	52.6											Column C	nrx-1 (ok1649)
	5		868.591	834.469	705.588	943.395	498.14				P value	<0.0001
	6		839.782	986.616	767.874	900.239	1063.3				P value summary	****											Unpaired t test
	7		897.757	859.429	602.967	709.956	1052.55				Significant diff. among means (P < 0.05)?	Yes											P value	<0.0001
	8		841.795	966.406	754.925	869.498	632.995				R square	0.2632											P value summary	****
	9		990.444	896.885	874.826	969.42	1034.68																Significantly different (P < 0.05)?	Yes
	10		1043.59	1035.38	760.001	869.538	987.714				Brown-Forsythe test												One- or two-tailed P value?	Two-tailed
	11		942.78	725.386	710.238	832.038	985.715				F (DFn, DFd)	7.685 (4, 589)											t, df	t=5.673, df=237
	12		989.174	1046.73	708.774	861.512	967.202				P value	<0.0001
	13		804.004	1071.59	703.902	994.515	939.548				P value summary	****											How big is the difference?
	14		949.734	777.985	628.011	734.066	924.074				Are SDs significantly different (P < 0.05)?	Yes											Mean of column C	785.2
	15		988.05	1080.77	776.701	597.646	921.745																Mean of column D	691.2
	16		842.651	900.615	648.437	960.364	921.446				Bartlett's test												Difference between means (D - C) ± SEM	-93.99 ± 16.57
	17		937.265	933.75	638.492	981.396	910.776				Bartlett's statistic (corrected)	34.1											95% confidence interval	-126.6 to -61.35
	18		785.231	735.753	562.119	1126.51	877.15				P value	<0.0001											R squared (eta squared)	0.1195
	19		810.631	716.91	775.002	866.032	873.463				P value summary	****
	20		833.591	530.811	623.809	1028.99	861.528				Are SDs significantly different (P < 0.05)?	Yes											F test to compare variances
	21		643.835	875.039	563.315	962.643	732.242																F, DFn, Dfd	1.687, 119, 118
	22		867.702	730.876	775.965	461.206	720.171				ANOVA table	SS	DF	MS	F (DFn, DFd)	P value							P value	0.0048
	23		961.002	816.281	841.106	1154.95	467.22				Treatment (between columns)	3853575	4	963394	F (4, 589) = 52.60	P<0.0001							P value summary	**
	24		940.835	721.208	799.463	1153.57	669.043				Residual (within columns)	10787120	589	18314									Significantly different (P < 0.05)?	Yes
	25		937.963	689.16	611.844	1146.05	530.478				Total	14640696	593
	26		908.642	695.891	732.855	554.466	638.654																Data analyzed
	27		936.071	805.351	589.718	963.733	444.527				Data summary												Sample size, column C	120
	28		946.062	578.308	645.831	1235.12	633.62				Number of treatments (columns)	5											Sample size, column D	119
	29		944.186	695.106	669.057	953.654	551.488				Number of values (total)	594
	30		1042.47	743.597	731.532	1130.87	460.559
Trial 2	1		659.713	913.374	709.833	704.558	853.224
	2		672.394	1032.92	714.017	960.905	638.128																UNPAIRED T-TEST
	3		787.619	862.517	804.145	1021.92	634.377				MULTIPLE COMPARISON												Table Analyzed	Body Length
	4		787.076	787.537	856.157	1000.95	633.619				Number of families	1											Column G	nlg-1 (tm474)
	5		782.264	973.869	737.05	1019.81	835.196				Number of comparisons per family	4											vs.	vs.
	6		821.586	1020.6	828.488	890.216	834.876				Alpha	0.05											Column F	nlg-1 (ok259)
	7		741.805	861.026	737.258	923.513	831.948
	8		710.268	870.785	868.77	851.785	831.509				Dunnett's multiple comparisons test	Mean Diff.	95.00% CI of diff.	Significant?	Summary	Adjusted P Value	A-?						Unpaired t test
	9		1026.86	736.704	630.96	1008.72	792.456				N2 (wildtype) vs. nrx-1 (ok1649)	106.2	63.17 to 149.2	Yes	****	<0.0001	C	nrx-1 (ok1649)					P value	<0.0001
	10		1038.04	785.617	734.124	849.145	790.352				N2 (wildtype) vs. nrx-1 (tm1961)	200.2	157.1 to 243.3	Yes	****	<0.0001	D	nrx-1 (tm1961)					P value summary	****
	11		1008	1006.46	739.673	793.103	779.592				N2 (wildtype) vs. nlg-1 (ok259)	-6.868	-49.99 to 36.25	No	ns	0.9855	F	nlg-1 (ok259)					Significantly different (P < 0.05)?	Yes
	12		998.14	831.846	650.23	530.963	770.55				N2 (wildtype) vs. nlg-1 (tm474)	141.4	98.25 to 184.5	Yes	****	<0.0001	G	nlg-1 (tm474)					One- or two-tailed P value?	Two-tailed
	13		1013.05	1152.21	729.353	830.01	766.649																t, df	t=7.524, df=236
	14		887.403	688.118	790.421	996.086	766.297				Test details	Mean 1	Mean 2	Mean Diff.	SE of diff.	n1	n2	q	DF
	15		1081.82	861.362	713.163	1091.29	760.635				N2 (wildtype) vs. nrx-1 (ok1649)	891.4	785.2	106.2	17.58	117	120	6.04	589				How big is the difference?
	16		861.524	722.734	689.379	764.089	754.213				N2 (wildtype) vs. nrx-1 (tm1961)	891.4	691.2	200.2	17.62	117	119	11.36	589				Mean of column F	898.3
	17		841.554	782.254	737.675	1046.19	752.67				N2 (wildtype) vs. nlg-1 (ok259)	891.4	898.3	-6.868	17.62	117	119	0.3898	589				Mean of column G	750
	18		752.107	704.869	621.979	956.551	751.663				N2 (wildtype) vs. nlg-1 (tm474)	891.4	750	141.4	17.62	117	119	8.024	589				Difference between means (G - F) ± SEM	-148.2 ± 19.70
	19		955.427	744.273	595.494	1111.65	736.601																95% confidence interval	-187.0 to -109.4
	20		812.718	676.398	807.985	861.108	908.837																R squared (eta squared)	0.1935
	21		725.885	837.023	900.392	1126.51	602.207
	22		732.43	815.851	670.313	1017.75	423.162																F test to compare variances
	23		820.174	691.673	640.788	1101.89	656.272																F, DFn, Dfd	1.823, 118, 118
	24		941.613	680.374	591.287	909.109	414.824																P value	0.0012
	25		846.441	737.812	756.596	1093.68	944.208																P value summary	**
	26		1079.39	981.603	690.529	911.237	1014.51																Significantly different (P < 0.05)?	Yes
	27		937.095	710.524	791.916	812.622	421.66
	28		960.191	804.737	649.828	1069.96	391.993																Data analyzed
	29		764.571	769.84	690.532	1052.47	641.489																Sample size, column F	119
	30		1066.92	737.357	689.025	1004.76	872.096																Sample size, column G	119
Trial 3	1		884.918	898.694	799.631	1006.99	726.414
	2		972.231	742.33	738.512	877.556	725.088
	3		798.583	1072.72	785.685	885.066	721.393
	4		997.073	696.531	726.729	826.945	716.499
	5		667.095	789.132	846.763	908.252	704.128
	6		962.515	1035.45	754.394	968.735	704.128
	7		869.854	801.93	717.363	897.932	691.478
	8		777.437	849.128	667.445	921.925	689.242
	9		954.058	723.187	803.579	780.621	683.42
	10		1027.58	936.181	756.834	741.824	683.42
	11		1120.94	972.884	794.396	814.973	672.705
	12		1068.75	721.348	896.483	852.424	669.007
	13		1074.54	985.696	653.902	1015.21	663.221
	14		1027.39	915.752	647.985	846.5	655.129
	15		1036.49	820.382	764.041	967.497	650.603
	16		995.975	782.269	794.865	946.921	650.339
	17		909.003	638.082	625.463	908.568	645.487
	18		804.758	783.364	696.725	857.424	642.952
	19		998.275	732.166	614.849	839.872	640.49
	20		892.33	701.419	724.401	865.886	779.669
	21		975.531	865.677	802.826	855.924	774.786
	22		1017.65	863.36	751.829	857.622	706.696
	23		872.997	888.585	589.848	775.723	665.831
	24		947.72	857.929	724.469	864.114	888.8
	25		889.447	688.465	626.606	642.258	720.299
	26		721.886	646.48	798.241	875.693	737.556
	27		690.408	709.499	585.636	850.003	769.981
	28		904.318	707.858	760.104	780.004	990.052
	29		1085.26	761.69	700.155	798.159	887.456
	30			955.527		898.339	718.07
Trial 4	1		838.085	612.646	688.7	864.905	852.262
	2		886.073	560.185	611.89	854.922	851.095
	3		964.17	748.07	287.788	841.462	838.511
	4		901.035	559.995	666.801	971.495	1047.2
	5		834.911	722.843	737.329	863.557	632.313
	6		837.036	581.354	327.051	925.406	625.668
	7		933.816	695.557	614.918	870.438	620.378
	8		873.913	625.269	750.857	827.834	611.816
	9		726.01	867.822	523.141	785.9	1123.23
	10		871.174	767.277	837.379	792.183	1114.15
	11		955.796	515.56	593.243	900.149	1066.09
	12		793.789	458.857	893.667	879.309	498.806
	13		865.186	551.808	635.682	912.003	498.976
	14		858.686	663.705	809.097	880.958	499.444
	15		799.152	864.875	596.677	708.742	500.767
	16		1059.19	566.106	726.819	841.409	514.65
	17		879.302	575.672	522.185	785.729	730.785
	18		764.321	723.175	496.973	923.709	729.994
	19		748.06	724.505	672.463	864.391	844.805
	20		1070.56	811.592	429.428	865.623	765.688
	21		744.968	570.537	538.542	786.267	844.737
	22		730.594	722.596	697.162	928.264	826.822
	23		719.669	700.383	618.129	921.22	882.338
	24		726.197	637.333	347.174	914.257	493.853
	25		944.125	611.109	630.83	938.929	797.396
	26		831.647	635.841	508.696	838.339	838.738
	27		973.476	750.441	514.108	758.064	970.625
	28		1000.13	650.05	749.332	758.607	853.166
	29			564.349	543.534	879.077	798.693
	30			589.91	732.546

## Sheet: Fig 1B-LA
Figure 1B		Locomotion Assay (LA)
											ANOVA RESULTS												UNPAIRED T-TEST
			N2 (wildtype)	nrx-1 (ok1649)	nrx-1 (tm1961)	nlg-1 (ok259)	nlg-1 (tm474)				Table Analyzed	Locomotion											Table Analyzed	Locomotion
Trial 1	1		106	173	92	36	28				Data sets analyzed	A, C, D, F, G
	2		94	127	143	35	78																Column D	nrx-1 (tm1961)
	3		96	147	82	91	18				ANOVA summary												vs.	vs.
	4		110	139	72	65	28				F	51.7											Column C	nrx-1 (ok1649)
	5		118	145	157	16	71				P value	<0.0001
	6		94	132	109	38	13				P value summary	****											Unpaired t test
	7		57	130	112	74	38				Significant diff. among means (P < 0.05)?	Yes											P value	0.0303
	8		123	138	120	38	95				R square	0.27											P value summary	*
	9		43	92	116	52	82																Significantly different (P < 0.05)?	Yes
	10		74	164	73	70	52				Brown-Forsythe test												One- or two-tailed P value?	Two-tailed
	11		47	142	130	46	96				F (DFn, DFd)	13.98 (4, 559)											t, df	t=2.180, df=220
	12		97	149	161	41	123				P value	<0.0001
	13		68	116	129	73	21				P value summary	****											How big is the difference?
	14		27	120	122	53	31				Are SDs significantly different (P < 0.05)?	Yes											Mean of column C	99.89
	15		74	68	67	113	136																Mean of column D	110.3
	16		26	69	94	125	5				Bartlett's test												Difference between means (D - C) ± SEM	10.38 ± 4.760
	17		44	81	91	106	34				Bartlett's statistic (corrected)	40.85											95% confidence interval	0.9941 to 19.76
	18		22	97	141	101	36				P value	<0.0001											R squared (eta squared)	0.02114
	19		35	48	130	140	37				P value summary	****
	20		72	95	111	175	25				Are SDs significantly different (P < 0.05)?	Yes											F test to compare variances
	21		104	37	99	103	44																F, DFn, Dfd	2.520, 102, 118
	22		84	105	43	126	78				ANOVA table	SS	DF	MS	F (DFn, DFd)	P value							P value	<0.0001
	23		117	98	158	155	27				Treatment (between columns)	255603	4	63901	F (4, 559) = 51.70	P<0.0001							P value summary	****
	24		105	48	121	147	33				Residual (within columns)	690964	559	1236									Significantly different (P < 0.05)?	Yes
	25		164	125	116	109	45				Total	946567	563
	26		71	139	115	135	37																Data analyzed
	27		83	122	83	116	13				Data summary												Sample size, column C	103
	28		166		124		76				Number of treatments (columns)	5											Sample size, column D	119
	29		126		107		59				Number of values (total)	564
	30		152		129		74
Trial 2	1		99	88	87	11	67
	2		79	100	125	25	69																UNPAIRED T-TEST
	3		121	135	136	18	57				MULTIPLE COMPARISON													Locomotion
	4		142	60	127	51	74				Number of families	1
	5		101	71	63	50	67				Number of comparisons per family	4											Column G	nlg-1 (tm474)
	6		105	133	122	16	96				Alpha	0.05											vs.	vs.
	7		129	73	110	25	10																Column F	nlg-1 (ok259)
	8		111	65	133	19	30				Dunnett's multiple comparisons test	Mean Diff.	95.00% CI of diff.	Significant?	Summary	Adjusted P Value	A-?
	9		82	95	83	17	23				N2 (wildtype) vs. nrx-1 (ok1649)	-14.33	-25.92 to -2.749	Yes	**	0.0093	C	nrx-1 (ok1649)					Unpaired t test
	10		118	74	134	31	28				N2 (wildtype) vs. nrx-1 (tm1961)	-24.71	-35.87 to -13.55	Yes	****	<0.0001	D	nrx-1 (tm1961)					P value	<0.0001
	11		67	39	138	77	21				N2 (wildtype) vs. nlg-1 (ok259)	8.308	-3.132 to 19.75	No	ns	0.2276	F	nlg-1 (ok259)					P value summary	****
	12		42	25	96	12	98				N2 (wildtype) vs. nlg-1 (tm474)	36.89	25.61 to 48.17	Yes	****	<0.0001	G	nlg-1 (tm474)					Significantly different (P < 0.05)?	Yes
	13		65	80	135	54	84																One- or two-tailed P value?	Two-tailed
	14		133	27	117	38	43				Test details	Mean 1	Mean 2	Mean Diff.	SE of diff.	n1	n2	q	DF				t, df	t=6.071, df=220
	15		72	26	74	75	20				N2 (wildtype) vs. nrx-1 (ok1649)	85.56	99.89	-14.33	4.722	120	103	3.035	559
	16		81	95	133	68	55				N2 (wildtype) vs. nrx-1 (tm1961)	85.56	110.3	-24.71	4.548	120	119	5.433	559				How big is the difference?
	17		97	162	117	56	95				N2 (wildtype) vs. nlg-1 (ok259)	85.56	77.25	8.308	4.663	120	108	1.782	559				Mean of column F	77.25
	18		107	126	113	60	21				N2 (wildtype) vs. nlg-1 (tm474)	85.56	48.67	36.89	4.598	120	114	8.023	559				Mean of column G	48.67
	19		118	109	129	41	54																Difference between means (G - F) ± SEM	-28.58 ± 4.708
	20		99	104	121	61	79																95% confidence interval	-37.86 to -19.30
	21		71	99	114	46	92																R squared (eta squared)	0.1435
	22		100	154	64	33	25
	23		123	170	142	61	16																F test to compare variances
	24		31	165	111	18	38																F, DFn, Dfd	2.259, 107, 113
	25		79	134	94	125	51																P value	<0.0001
	26		149	148	136	110	73																P value summary	****
	27		47		92	30	26																Significantly different (P < 0.05)?	Yes
	28		30		161	136	37
	29		41		121	100																	Data analyzed
	30		68																				Sample size, column F	108
Trial 3	1		111	73	89	33	45																Sample size, column G	114
	2		82	81	70	116	48
	3		118	31	101	11	37
	4		97	76	117	93	31
	5		120	18	112	27	50
	6		69	20	98	61	10
	7		99	26	95	18	78
	8		77	159	119	125	32
	9		90	40	86	110	28
	10		90	106	96	30	70
	11		105	72	92	136	101
	12		62	28	84	100	74
	13		40	142	112	136	65
	14		67	63	81	20	15
	15		126	109	127	45	65
	16		70	96	43	68	12
	17		80	44	55	66	54
	18		82	83	146	44	2
	19		42	91	78	70	27
	20		50	39	26	76	18
	21		67	68	118	80	10
	22		67	53	98	52	16
	23		15	49	124	60	27
	24		42	62	39	24	50
	25		39	34	122	53	9
	26		53		141	36	18
	27		100		112	105	35
	28		46		101		54
	29		100		68		52
	30		45		111		38
Trial 4	1		145	143	137	177	85
	2		42	166	90	93	72
	3		116	137	119	150	16
	4		45	153	98	79	23
	5		66	51	70	135	48
	6		28	100	134	123	76
	7		57	99	122	135	42
	8		61	129	87	125	68
	9		99	188	121	81	60
	10		44	121	101	108	72
	11		65	103	130	67	90
	12		133	169	86	112	50
	13		41	148	114	115	49
	14		126	107	112	106	27
	15		105	156	131	110	81
	16		125	59	102	96	24
	17		95	70	113	122	15
	18		191	150	124	110	58
	19		132	140	129	109	36
	20		126	131	120	110	54
	21		104	76	156	74	33
	22		65	79	138	73	40
	23		95	110	142	107	76
	24		107	113	108	99	84
	25		61	125	138	89	45
	26		70		145		71
	27		130		151
	28		85		111
	29		75		148
	30		76		109

## Sheet: Fig 1C- RBA
Figure 1C		Repetitive Behavior Assay (RBA)
											ANOVA RESULTS												UNPAIRED T-TEST
			N2 (wildtype)	nrx-1 (ok1649)	nrx-1 (tm1961)	nlg-1 (ok259)	nlg-1 (tm474)				Table Analyzed	Repetitive											Table Analyzed	Repetitive
Trial 1	1		2	3	3	1	3				Data sets analyzed	A, C, D, F, G
	2		0	3	2	2	2																Column D	nrx-1 (tm1961)
	3		3	0	2	0	1				ANOVA summary												vs.	vs.
	4		2	4	4	1	1				F	30.27											Column C	nrx-1 (ok1649)
	5		2	1	7	4	0				P value	<0.0001
	6		3	2	2	4	0				P value summary	****											Unpaired t test
	7		0	4	0	3	1				Significant diff. among means (P < 0.05)?	Yes											P value	0.144
	8		3	6	5	0	2				R square	0.1781											P value summary	ns
	9		2	3	4	3	0																Significantly different (P < 0.05)?	No
	10		1	1	5	3	2				Brown-Forsythe test												One- or two-tailed P value?	Two-tailed
	11		1	1	3	0	1				F (DFn, DFd)	12.46 (4, 559)											t, df	t=1.466, df=220
	12		3	1	5	4	0				P value	<0.0001
	13		1	0	3	1	0				P value summary	****											How big is the difference?
	14		3	6	4	2	2				Are SDs significantly different (P < 0.05)?	Yes											Mean of column C	2.301
	15		0	5	3	0	1																Mean of column D	2.647
	16		0	5	6	4	2				Bartlett's test												Difference between means (D - C) ± SEM	0.3461 ± 0.2361
	17		0	1	3	2	0				Bartlett's statistic (corrected)	54.38											95% confidence interval	-0.1191 to 0.8113
	18		1	3	4	0	2				P value	<0.0001											R squared (eta squared)	0.009676
	19		1	4	1	3	0				P value summary	****
	20		2	0	5	3	2				Are SDs significantly different (P < 0.05)?	Yes											F test to compare variances
	21		1	2	2	0	0																F, DFn, Dfd	1.165, 102, 118
	22		1	1	6	0	3				ANOVA table	SS	DF	MS	F (DFn, DFd)	P value							P value	0.4211
	23		1	2	1	3	0				Treatment (between columns)	253.7	4	63.43	F (4, 559) = 30.27	P<0.0001							P value summary	ns
	24		3	5	0	0	2				Residual (within columns)	1171	559	2.095									Significantly different (P < 0.05)?	No
	25		0	6	2	2	2				Total	1425	563
	26		3	3	6	0	0																Data analyzed
	27		1	5	5	1	1				Data summary												Sample size, column C	103
	28		0		5		3				Number of treatments (columns)	5											Sample size, column D	119
	29		0		2		0				Number of values (total)	564
	30		0		3		2
Trial 2	1		0	2	0	0	0
	2		0	1	2	0	0																UNPAIRED T-TEST
	3		1	3	5	1	1				MULTIPLE COMPARISON												Table Analyzed	Repetitive
	4		0	0	1	2	0				Number of families	1
	5		0	2	4	2	1				Number of comparisons per family	4											Column G	nlg-1 (tm474)
	6		2	2	5	1	2				Alpha	0.05											vs.	vs.
	7		0	0	4	0	1																Column F	nlg-1 (ok259)
	8		0	1	2	0	0				Dunnett's multiple comparisons test	Mean Diff.	95.00% CI of diff.	Significant?	Summary	Adjusted P Value	A-?
	9		1	1	1	0	2				N2 (wildtype) vs. nrx-1 (ok1649)	-1.101	-1.578 to -0.6240	Yes	****	<0.0001	C	nrx-1 (ok1649)					Unpaired t test
	10		0	3	0	2	2				N2 (wildtype) vs. nrx-1 (tm1961)	-1.447	-1.906 to -0.9876	Yes	****	<0.0001	D	nrx-1 (tm1961)					P value	0.3256
	11		4	1	2	3	1				N2 (wildtype) vs. nlg-1 (ok259)	0.01481	-0.4562 to 0.4858	No	ns	0.9999	F	nlg-1 (ok259)					P value summary	ns
	12		0	2	3	2	0				N2 (wildtype) vs. nlg-1 (tm474)	0.1737	-0.2908 to 0.6381	No	ns	0.7725	G	nlg-1 (tm474)					Significantly different (P < 0.05)?	No
	13		2	1	2	0	2																One- or two-tailed P value?	Two-tailed
	14		2	1	3	1	1				Test details	Mean 1	Mean 2	Mean Diff.	SE of diff.	n1	n2	q	DF				t, df	t=0.9853, df=220
	15		1	4	4	0	1				N2 (wildtype) vs. nrx-1 (ok1649)	1.2	2.301	-1.101	0.1944	120	103	5.663	559
	16		0	3	1	0	0				N2 (wildtype) vs. nrx-1 (tm1961)	1.2	2.647	-1.447	0.1873	120	119	7.727	559				How big is the difference?
	17		1	6	3	0	2				N2 (wildtype) vs. nlg-1 (ok259)	1.2	1.185	0.01481	0.192	120	108	0.07716	559				Mean of column F	1.185
	18		2	3	2	4	1				N2 (wildtype) vs. nlg-1 (tm474)	1.2	1.026	0.1737	0.1893	120	114	0.9174	559				Mean of column G	1.026
	19		0	6	1	0	3																Difference between means (G - F) ± SEM	-0.1589 ± 0.1612
	20		1	3	6	3	0																95% confidence interval	-0.4766 to 0.1589
	21		4	4	2	0	1																R squared (eta squared)	0.004393
	22		0	3	3	0	1
	23		0	3	4	0	0																F test to compare variances
	24		1	5	2	2	2																F, DFn, Dfd	2.137, 107, 113
	25		1	6	1	0	0																P value	<0.0001
	26		0	1	3	0	0																P value summary	****
	27		0		1	0	1																Significantly different (P < 0.05)?	Yes
	28		1		4	0	1
	29		0		3	2																	Data analyzed
	30		1																				Sample size, column F	108
Trial 3	1		1	1	3	2	1																Sample size, column G	114
	2		5	4	0	2	3
	3		1	2	2	4	0
	4		4	3	2	0	2
	5		1	0	1	1	0
	6		3	1	6	2	2
	7		1	5	1	2	1
	8		2	5	3	0	0
	9		1	4	1	5	0
	10		3	2	0	3	1
	11		2	1	2	0	0
	12		4	0	2	1	1
	13		2	1	1	3	1
	14		4	0	5	1	2
	15		0	1	2	0	1
	16		1	2	2	0	1
	17		0	1	3	0	3
	18		3	3	0	1	2
	19		2	1	3	2	2
	20		1	6	0	3	1
	21		1	1	0	0	0
	22		0	1	5	0	2
	23		1	1	2	2	1
	24		1	1	6	4	0
	25		1	2	3	0	1
	26		2		6	1	0
	27		0		1	0	2
	28		0		0		0
	29		0		2		1
	30		0		3		0
Trial 4	1		0	5	3	1	0
	2		2	0	5	0	1
	3		1	0	5	2	0
	4		1	4	2	0	1
	5		1	3	2	0	1
	6		0	5	3	0	1
	7		4	5	2	1	0
	8		0	1	3	1	1
	9		0	1	3	0	0
	10		0	0	4	0	2
	11		3	1	3	1	0
	12		2	0	1	1	0
	13		0	2	0	0	1
	14		1	2	0	3	2
	15		1	1	3	0	0
	16		1	0	2	0	0
	17		3	4	3	5	1
	18		0	0	2	0	0
	19		0	1	2	0	3
	20		2	1	2	0	3
	21		2	1	1	0	1
	22		1	1	4	0	2
	23		2	2	1	0	3
	24		0	4	1	3	0
	25		1	0	4	0	0
	26		0		2		2
	27		2		3
	28		0		1
	29		2		1
	30		0		3

## Sheet: Fig 1(E-F)-C&B
Figure 1E-F		Clumping & Bodering (C&B)
		npr-1		N2 (wildtype)	nrx-1 (ok1649)	nrx-1 (tm1961)	nlg-1 (ok259)	nlg-1 (tm474)				ANOVA RESULTS												UNPAIRED T-TEST
Clumping	Trial 1	92.5562		18.4382	82.0064	78.1627	44.6809	61.4138				Table Analyzed	Clumping											Table Analyzed	Clumping
	Trial 2	92.8258		39.6497	44.1648	58.3815	47.9866	51.5209				Data sets analyzed	A, C, D, F, G
	Trial 3	93.9394		18.0498	48.866	68.4492	39.2193	61.3793																Column F	nlg-1 (ok259)
	Trial 4	78.125		17.119	73.2102	68.3616	46.0857	38.8128				ANOVA summary												vs.	vs.
												F	9.469											Column A	N2 (wildtype)
												P value	0.0005
												P value summary	***											Unpaired t test
Bordering	Trial 1	83.1461		11.9306	6.05096	58.5843	7.29927	59.352				Significant diff. among means (P < 0.05)?	Yes											P value	0.0104
	Trial 2	84.9195		13.2166	18.3066	49.711	8.47145	47.7186				R square	0.7163											P value summary	*
	Trial 3	70.303		24.4813	13.8144	57.754	7.47029	25.7931																Significantly different (P < 0.05)?	Yes
	Trial 4	64.8438		16.4927	38.7991	12.6177	7.23781	13.9269				Brown-Forsythe test												One- or two-tailed P value?	Two-tailed
												F (DFn, DFd)	2.400 (4, 15)											t, df	t=3.671, df=6
												P value	0.0961
												P value summary	ns											How big is the difference?
												Are SDs significantly different (P < 0.05)?	No											Mean of column A	23.31
																								Mean of column F	44.49
												Bartlett's test												Difference between means (F - A) ± SEM	21.18 ± 5.768
												Bartlett's statistic (corrected)	5.757											95% confidence interval	7.064 to 35.29
												P value	0.218											R squared (eta squared)	0.692
		Raw Values		Calculated Values								P value summary	ns
		npr-1										Are SDs significantly different (P < 0.05)?	No											F test to compare variances
		Total No of worms	No. Clumped	Clumping Percentage																				F, DFn, Dfd	8.376, 3, 3
	Trial 1	712	659	92.5562								ANOVA table	SS	DF	MS	F (DFn, DFd)	P value							P value	0.1144
	Trial 2	683	634	92.8258								Treatment (between columns)	4938	4	1235	F (4, 15) = 9.469	P=0.0005							P value summary	ns
	Trial 3	660	620	93.9394								Residual (within columns)	1956	15	130.4									Significantly different (P < 0.05)?	No
	Trial 4	512	400	78.125								Total	6894	19
																								Data analyzed
												Data summary												Sample size, column A	4
		Total No of worms	No. at Border	Bordering Percentage								Number of treatments (columns)	5											Sample size, column F	4
	Trial 1	712	592	83.1461								Number of values (total)	20
	Trial 2	683	580	84.9195
	Trial 3	660	464	70.303
	Trial 4	512	332	64.8438																				UNPAIRED T-TEST
												MULTIPLE COMPARISON												Table Analyzed	Clumping
												Number of families	1
		N2 (wildtype)										Number of comparisons per family	4											Column D	nrx-1 (tm1961)
		Total No of worms	No. Clumped	Clumping Percentage								Alpha	0.05											vs.	vs.
	Trial 1	461	85	18.4382																				Column C	nrx-1 (ok1649)
	Trial 2	628	249	39.6497								Dunnett's multiple comparisons test	Mean Diff.	95.00% CI of diff.	Significant?	Summary	Adjusted P Value	A-?
	Trial 3	482	87	18.0498								N2 (wildtype) vs. nrx-1 (ok1649)	-38.75	-60.77 to -16.73	Yes	***	0.0008	C	nrx-1 (ok1649)					Unpaired t test
	Trial 4	479	82	17.119								N2 (wildtype) vs. nrx-1 (tm1961)	-45.02	-67.05 to -23.00	Yes	***	0.0002	D	nrx-1 (tm1961)					P value	0.5553
												N2 (wildtype) vs. nlg-1 (ok259)	-21.18	-43.20 to 0.8432	No	ns	0.0609	F	nlg-1 (ok259)					P value summary	ns
												N2 (wildtype) vs. nlg-1 (tm474)	-29.97	-51.99 to -7.945	Yes	**	0.0072	G	nlg-1 (tm474)					Significantly different (P < 0.05)?	No
		Total No of worms	No. at Border	Bordering Percentage																				One- or two-tailed P value?	Two-tailed
	Trial 1	461	55	11.9306								Test details	Mean 1	Mean 2	Mean Diff.	SE of diff.	n1	n2	q	DF				t, df	t=0.6245, df=6
	Trial 2	628	83	13.2166								N2 (wildtype) vs. nrx-1 (ok1649)	23.31	62.06	-38.75	8.074	4	4	4.799	15
	Trial 3	482	118	24.4813								N2 (wildtype) vs. nrx-1 (tm1961)	23.31	68.34	-45.02	8.074	4	4	5.577	15				How big is the difference?
	Trial 4	479	79	16.4927								N2 (wildtype) vs. nlg-1 (ok259)	23.31	44.49	-21.18	8.074	4	4	2.623	15				Mean of column C	62.06
												N2 (wildtype) vs. nlg-1 (tm474)	23.31	53.28	-29.97	8.074	4	4	3.712	15				Mean of column D	68.34
																								Difference between means (D - C) ± SEM	6.277 ± 10.05
																								95% confidence interval	-18.32 to 30.87
		nrx-1 (ok1649)																						R squared (eta squared)	0.06104
		Total No of worms	No. Clumped	Clumping Percentage
	Trial 1	628	515	82.0064																				F test to compare variances
	Trial 2	437	193	44.1648																				F, DFn, Dfd	5.195, 3, 3
	Trial 3	485	237	48.866																				P value	0.2092
	Trial 4	433	317	73.2102																				P value summary	ns
																								Significantly different (P < 0.05)?	No
		Total No of worms	No. at Border	Bordering Percentage																				Data analyzed
	Trial 1	628	38	6.05096																				Sample size, column C	4
	Trial 2	437	80	18.3066																				Sample size, column D	4
	Trial 3	485	67	13.8144
	Trial 4	433	168	38.7991
																								UNPAIRED T-TEST
																								Table Analyzed	Clumping
		nrx-1 (tm1961)
		Total No of worms	No. Clumped	Clumping Percentage																				Column G	nlg-1 (tm474)
	Trial 1	664	519	78.1627																				vs.	vs.
	Trial 2	519	303	58.3815																				Column F	nlg-1 (ok259)
	Trial 3	561	384	68.4492
	Trial 4	531	363	68.3616																				Unpaired t test
																								P value	0.1726
																								P value summary	ns
		Total No of worms	No. at Border	Bordering Percentage																				Significantly different (P < 0.05)?	No
	Trial 1	664	389	58.5843																				One- or two-tailed P value?	Two-tailed
	Trial 2	519	258	49.711																				t, df	t=1.548, df=6
	Trial 3	561	324	57.754
	Trial 4	531	67	12.6177																				How big is the difference?
																								Mean of column F	44.49
																								Mean of column G	53.28
																								Difference between means (G - F) ± SEM	8.789 ± 5.677
		nlg-1 (ok259)																						95% confidence interval	-5.103 to 22.68
		Total No of worms	No. Clumped	Clumping Percentage																				R squared (eta squared)	0.2854
	Trial 1	611	273	44.6809
	Trial 2	596	286	47.9866																				F test to compare variances
	Trial 3	538	211	39.2193																				F, DFn, Dfd	8.081, 3, 3
	Trial 4	677	312	46.0857																				P value	0.1199
																								P value summary	ns
																								Significantly different (P < 0.05)?	No
		Total No of worms	No. at Border	Bordering Percentage
	Trial 1	274	20	7.29927																				Data analyzed
	Trial 2	543	46	8.47145																				Sample size, column F	4
	Trial 3	589	44	7.47029																				Sample size, column G	4
	Trial 4	677	49	7.23781
																								UNPAIRED T-TEST
		nlg-1 (tm474)																						Table Analyzed	Clumping_npr-1 vs N2
		Total No of worms	No. Clumped	Clumping Percentage
	Trial 1	679	417	61.4138																				Column B	npr-1
	Trial 2	526	271	51.5209																				vs.	vs.
	Trial 3	725	445	61.3793																				Column A	N2 (wildtype)
	Trial 4	438	170	38.8128
																								Unpaired t test
																								P value	<0.0001
		Total No of worms	No. at Border	Bordering Percentage																				P value summary	****
	Trial 1	679	403	59.352																				Significantly different (P < 0.05)?	Yes
	Trial 2	526	251	47.7186																				One- or two-tailed P value?	Two-tailed
	Trial 3	725	187	25.7931																				t, df	t=9.975, df=6
	Trial 4	438	61	13.9269
																								How big is the difference?
																								Mean of column A	23.31
																								Mean of column B	89.36
																								Difference between means (B - A) ± SEM	66.05 ± 6.622
																								95% confidence interval	49.85 to 82.25
																								R squared (eta squared)	0.9431
																								F test to compare variances
																								F, DFn, Dfd	2.105, 3, 3
																								P value	0.5565
																								P value summary	ns
																								Significantly different (P < 0.05)?	No
																								Data analyzed
																								Sample size, column A	4
																								Sample size, column B	4
												ANOVA RESULTS												UNPAIRED T-TEST
												Table Analyzed	Bordering											Table Analyzed	Bordering
												Data sets analyzed	A, C, D, F, G
																								Column D	nrx-1 (tm1961)
												ANOVA summary												vs.	vs.
												F	4.138											Column A	N2 (wildtype)
												P value	0.0187
												P value summary	*											Unpaired t test
												Significant diff. among means (P < 0.05)?	Yes											P value	0.0462
												R square	0.5246											P value summary	*
																								Significantly different (P < 0.05)?	Yes
												Brown-Forsythe test												One- or two-tailed P value?	Two-tailed
												F (DFn, DFd)	1.842 (4, 15)											t, df	t=2.506, df=6
												P value	0.1733
												P value summary	ns											How big is the difference?
												Are SDs significantly different (P < 0.05)?	No											Mean of column A	16.53
																								Mean of column D	44.67
												Bartlett's test												Difference between means (D - A) ± SEM	28.14 ± 11.23
												Bartlett's statistic (corrected)	19.16											95% confidence interval	0.6616 to 55.61
												P value	0.0007											R squared (eta squared)	0.5114
												P value summary	***
												Are SDs significantly different (P < 0.05)?	Yes											F test to compare variances
																								F, DFn, Dfd	14.87, 3, 3
												ANOVA table	SS	DF	MS	F (DFn, DFd)	P value							P value	0.0527
												Treatment (between columns)	3722	4	930.6	F (4, 15) = 4.138	P=0.0187							P value summary	ns
												Residual (within columns)	3373	15	224.9									Significantly different (P < 0.05)?	No
												Total	7095	19
																								Data analyzed
												Data summary												Sample size, column A	4
												Number of treatments (columns)	5											Sample size, column D	4
												Number of values (total)	20
																								UNPAIRED T-TEST
												MULTIPLE COMPARISON												Table Analyzed	Bordering
												Number of families	1
												Number of comparisons per family	4											Column F	nlg-1 (ok259)
												Alpha	0.05											vs.	vs.
																								Column A	N2 (wildtype)
												Dunnett's multiple comparisons test	Mean Diff.	95.00% CI of diff.	Significant?	Summary	Adjusted P Value	A-?
												N2 (wildtype) vs. nrx-1 (ok1649)	-2.712	-31.63 to 26.21	No	ns	0.9968	C	nrx-1 (ok1649)					Unpaired t test
												N2 (wildtype) vs. nrx-1 (tm1961)	-28.14	-57.06 to 0.7845	No	ns	0.0575	D	nrx-1 (tm1961)					P value	0.02
												N2 (wildtype) vs. nlg-1 (ok259)	8.911	-20.01 to 37.83	No	ns	0.8156	F	nlg-1 (ok259)					P value summary	*
												N2 (wildtype) vs. nlg-1 (tm474)	-20.17	-49.09 to 8.754	No	ns	0.2183	G	nlg-1 (tm474)					Significantly different (P < 0.05)?	Yes
																								One- or two-tailed P value?	Two-tailed
												Test details	Mean 1	Mean 2	Mean Diff.	SE of diff.	n1	n2	q	DF				t, df	t=3.145, df=6
												N2 (wildtype) vs. nrx-1 (ok1649)	16.53	19.24	-2.712	10.6	4	4	0.2558	15
												N2 (wildtype) vs. nrx-1 (tm1961)	16.53	44.67	-28.14	10.6	4	4	2.654	15				How big is the difference?
												N2 (wildtype) vs. nlg-1 (ok259)	16.53	7.62	8.911	10.6	4	4	0.8404	15				Mean of column A	16.53
												N2 (wildtype) vs. nlg-1 (tm474)	16.53	36.7	-20.17	10.6	4	4	1.902	15				Mean of column F	7.62
																								Difference between means (F - A) ± SEM	-8.911 ± 2.834
																								95% confidence interval	-15.84 to -1.977
																								R squared (eta squared)	0.6224
																								F test to compare variances
																								F, DFn, Dfd	95.71, 3, 3
																								P value	0.0036
																								P value summary	**
																								Significantly different (P < 0.05)?	Yes
																								Data analyzed
																								Sample size, column A	4
																								Sample size, column F	4
																								UNPAIRED T-TEST
																								Table Analyzed	Bordering
																								Column D	nrx-1 (tm1961)
																								vs.	vs.
																								Column C	nrx-1 (ok1649)
																								Unpaired t test
																								P value	0.0967
																								P value summary	ns
																								Significantly different (P < 0.05)?	No
																								One- or two-tailed P value?	Two-tailed
																								t, df	t=1.967, df=6
																								How big is the difference?
																								Mean of column C	19.24
																								Mean of column D	44.67
																								Difference between means (D - C) ± SEM	25.42 ± 12.92
																								95% confidence interval	-6.200 to 57.05
																								R squared (eta squared)	0.3921
																								F test to compare variances
																								F, DFn, Dfd	2.416, 3, 3
																								P value	0.4878
																								P value summary	ns
																								Significantly different (P < 0.05)?	No
																								Data analyzed
																								Sample size, column C	4
																								Sample size, column D	4
																								UNPAIRED T-TEST
																								Table Analyzed	Bordering
																								Column G	nlg-1 (tm474)
																								vs.	vs.
																								Column F	nlg-1 (ok259)
																								Unpaired t test
																								P value	0.0302
																								P value summary	*
																								Significantly different (P < 0.05)?	Yes
																								One- or two-tailed P value?	Two-tailed
																								t, df	t=2.823, df=6
																								How big is the difference?
																								Mean of column F	7.62
																								Mean of column G	36.7
																								Difference between means (G - F) ± SEM	29.08 ± 10.30
																								95% confidence interval	3.875 to 54.28
																								R squared (eta squared)	0.5705
																								F test to compare variances
																								F, DFn, Dfd	1277, 3, 3
																								P value	<0.0001
																								P value summary	****
																								Significantly different (P < 0.05)?	Yes
																								Data analyzed
																								Sample size, column F	4
																								Sample size, column G	4
																								UNPAIRED T-TEST
																								Table Analyzed	Bordering_npr-1 vs N2
																								Column B	npr-1
																								vs.	vs.
																								Column A	N2 (wildtype)
																								Unpaired t test
																								P value	<0.0001
																								P value summary	****
																								Significantly different (P < 0.05)?	Yes
																								One- or two-tailed P value?	Two-tailed
																								t, df	t=10.50, df=6
																								How big is the difference?
																								Mean of column A	16.53
																								Mean of column B	75.8
																								Difference between means (B - A) ± SEM	59.27 ± 5.648
																								95% confidence interval	45.45 to 73.09
																								R squared (eta squared)	0.9483
																								F test to compare variances
																								F, DFn, Dfd	3.014, 3, 3
																								P value	0.3891
																								P value summary	ns
																								Significantly different (P < 0.05)?	No
																								Data analyzed
																								Sample size, column A	4
																								Sample size, column B	4

## Sheet: Fig 1H-Nos_VNC
Fig 1H		Nos of VNC
											ANOVA RESULTS												UNPAIRED T-TEST
			N2 (wildtype)	nrx-1 (ok1649)	nrx-1 (tm1961)	nlg-1 (ok259)	nlg-1 (tm474)				Table Analyzed	DAPI_NoVNC											Table Analyzed	DAPI_NoVNC
Trial 1	1		56	49	49	70	50				Data sets analyzed	A, C, D, F, G
	2		52	48	50	65	51																Column D	nrx-1 (tm1961)
	3		50	43	48	70	45				ANOVA summary												vs.	vs.
	4		55	43	47	46	50				F	37.63											Column C	nrx-1 (ok1649)
	5		41	26	51	43	55				P value	<0.0001
	6		40	35	47	47	31				P value summary	****											Unpaired t test
	7		45	33	38	53	54				Significant diff. among means (P < 0.05)?	Yes											P value	0.2685
	8		55	45	41	53	50				R square	0.2057											P value summary	ns
	9		52	30	46	48	48																Significantly different (P < 0.05)?	No
	10		56	35	43	49	50				Brown-Forsythe test												One- or two-tailed P value?	Two-tailed
	11		41	43	47	40	50				F (DFn, DFd)	5.124 (4, 581)											t, df	t=1.109, df=226
	12		42	62	42	53	49				P value	0.0005
	13		47	43	39	72	57				P value summary	***											How big is the difference?
	14		45	43	48	59	50				Are SDs significantly different (P < 0.05)?	Yes											Mean of column C	44.5
	15		56	26	53	51	49																Mean of column D	45.58
	16		52	35	22	47	36				Bartlett's test												Difference between means (D - C) ± SEM	1.078 ± 0.9720
	17		50	33	40	50	51				Bartlett's statistic (corrected)	24.29											95% confidence interval	-0.8372 to 2.994
	18		58	45	32	39	40				P value	<0.0001											R squared (eta squared)	0.005415
	19		44	30	50	50	55				P value summary	****
	20		46	35	27	50	48				Are SDs significantly different (P < 0.05)?	Yes											F test to compare variances
	21		65	43	47	39	38																F, DFn, Dfd	1.016, 112, 114
	22		41	26	52	55	46				ANOVA table	SS	DF	MS	F (DFn, DFd)	P value							P value	0.9315
	23		41	34	62	50	54				Treatment (between columns)	9927	4	2482	F (4, 581) = 37.63	P<0.0001							P value summary	ns
	24		86	31	45	51	40				Residual (within columns)	38322	581	65.96									Significantly different (P < 0.05)?	No
	25		50	42	42	46	43				Total	48249	585
	26		69	41	49	45	41																Data analyzed
	27		85	38	45	72	41				Data summary												Sample size, column C	113
	28		76		59	59	50				Number of treatments (columns)	5											Sample size, column D	115
	29		53		31	51	42				Number of values (total)	586
	30		48		51	74	47
Trial 2	1		45	52	54	47	45
	2		52	51	45	54	50																UNPAIRED T-TEST
	3		54	47	52	51	48				MULTIPLE COMPARISON												Table Analyzed	DAPI_NoVNC
	4		44	57	53	49	54				Number of families	1
	5		48	50	46	47	46				Number of comparisons per family	4											Column G	nlg-1 (tm474)
	6		48	45	60	49	44				Alpha	0.05											vs.	vs.
	7		38	54	65	57	63																Column F	nlg-1 (ok259)
	8		56	40	49	54	61				Dunnett's multiple comparisons test	Mean Diff.	95.00% CI of diff.	Significant?	Summary	Adjusted P Value	A-?
	9		46	50	62	42	50				N2 (wildtype) vs. nrx-1 (ok1649)	8.911	6.293 to 11.53	Yes	****	<0.0001	C	nrx-1 (ok1649)					Unpaired t test
	10		53	52	60	53	44				N2 (wildtype) vs. nrx-1 (tm1961)	7.833	5.226 to 10.44	Yes	****	<0.0001	D	nrx-1 (tm1961)					P value	<0.0001
	11		56	53	39	50	47				N2 (wildtype) vs. nlg-1 (ok259)	-1.276	-3.855 to 1.302	No	ns	0.5598	F	nlg-1 (ok259)					P value summary	****
	12		48	42	46	53	44				N2 (wildtype) vs. nlg-1 (tm474)	5.565	2.986 to 8.144	Yes	****	<0.0001	G	nlg-1 (tm474)					Significantly different (P < 0.05)?	Yes
	13		59	50	50	60	59																One- or two-tailed P value?	Two-tailed
	14		65	41	45	47	55				Test details	Mean 1	Mean 2	Mean Diff.	SE of diff.	n1	n2	q	DF				t, df	t=6.242, df=238
	15		45	50	52	42	49				N2 (wildtype) vs. nrx-1 (ok1649)	53.42	44.5	8.911	1.069	118	113	8.336	581
	16		45	57	47	67	41				N2 (wildtype) vs. nrx-1 (tm1961)	53.42	45.58	7.833	1.064	118	115	7.36	581				How big is the difference?
	17		80	44	34	60	44				N2 (wildtype) vs. nlg-1 (ok259)	53.42	54.69	-1.276	1.053	118	120	1.212	581				Mean of column F	54.69
	18		61	42	51	77	52				N2 (wildtype) vs. nlg-1 (tm474)	53.42	47.85	5.565	1.053	118	120	5.286	581				Mean of column G	47.85
	19		63	41	47	63	41																Difference between means (G - F) ± SEM	-6.842 ± 1.096
	20		57	37	44	58	40																95% confidence interval	-9.001 to -4.682
	21		61	52	42	76	41																R squared (eta squared)	0.1407
	22		61	41	42	49	42
	23		62	51	47	62	47																F test to compare variances
	24		55	62	46	53	57																F, DFn, Dfd	2.179, 119, 119
	25		62	42	31	62	49																P value	<0.0001
	26		55	51	40	66	56																P value summary	****
	27		56	35	60	66	51																Significantly different (P < 0.05)?	Yes
	28		44	46	51	66	43
	29		71	45	60	70	54																Data analyzed
	30		62	35	41	63	38																Sample size, column F	120
Trial 3	1		53	48	41	55	42																Sample size, column G	120
	2		55	42	36	52	51
	3		51	55	45	73	41
	4		54	47	33	62	30
	5		56	42	30	55	53
	6		55	39	44	52	44
	7		44	40	48	54	49
	8		52	48	40	76	50
	9		60	48	39	60	51
	10		59	41	48	59	42
	11		46	44	40	66	48
	12		54	46	47	59	36
	13		52	36	45	75	54
	14		47	47	37	66	44
	15		39	37	49	57	25
	16		55	55	49	50	39
	17		53	48	47	36	49
	18		58	50	47	45	50
	19		51	47	31	54	45
	20		59	44	44	49	59
	21		52	46	38	54	53
	22		57	42	43	45	59
	23		62	56	46	42	53
	24		60	55	49	54	63
	25		60	48	46	43	42
	26		57	54	48	47	50
	27		59	48	36	39	54
	28		58	54		52	45
	29		62	48		46	33
	30		59	37		41	51
Trial 4	1		56	41	46	58	51
	2		49	44	45	45	51
	3		45	50	43	47	54
	4		48	48	49	64	43
	5		55	40	48	59	53
	6		47	45	48	55	53
	7		56	49	49	72	40
	8		52	41	50	62	55
	9		59	40	45	70	56
	10		44	47	41	62	59
	11		49	43	44	72	51
	12		48	49	46	64	50
	13		43	40	48	54	53
	14		57	50	52	74	59
	15		60	54	33	66	50
	16		59	40	50	54	40
	17		43	33	47	45	53
	18		49	51	42	34	45
	19		52	54	53	51	50
	20		44	44	54	43	41
	21		53	48	44	52	45
	22		46	50	45	42	46
	23		55	51	42	52	42
	24		49	38	41	50	48
	25		60	49	43	52	44
	26		51	46	47	44	48
	27		53		45	50	52
	28		33		52	44	48
	29					46	46
	30					52	45

## Sheet: Fig 1I-Area_VNC
Fig 1I		Avg Area of VNC
											ANOVA RESULTS												UNPAIRED T-TEST
			N2 (wildtype)	nrx-1 (ok1649)	nrx-1 (tm1961)	nlg-1 (ok259)	nlg-1 (tm474)				Table Analyzed	DAPI_AoVNC											Table Analyzed	DAPI_AoVNC
Trial 1	1		5.062	2.472	2.319	2.633	2.976				Data sets analyzed	A, C, D, F, G
	2		4.887	2.871	1.937	3.564	3.391																Column D	nrx-1 (tm1961)
	3		4.881	2.613	2.927	3.341	2.713				ANOVA summary												vs.	vs.
	4		3.167	2.567	2.261	2.752	3.111				F	87.99											Column C	nrx-1 (ok1649)
	5		5.492	2.431	2.47	3.2	2.88				P value	<0.0001
	6		3.763	2.434	2.151	2.898	2.596				P value summary	****											Unpaired t test
	7		5.367	2.792	2.679	2.805	2.934				Significant diff. among means (P < 0.05)?	Yes											P value	<0.0001
	8		4.611	2.236	2.77	2.945	2.838				R square	0.3781											P value summary	****
	9		5.849	3.415	2.664	2.861	3.161																Significantly different (P < 0.05)?	Yes
	10		5.561	2.298	2.25	2.879	3.642				Brown-Forsythe test												One- or two-tailed P value?	Two-tailed
	11		7.131	2.475	2.167	3.204	3.236				F (DFn, DFd)	18.76 (4, 579)											t, df	t=7.344, df=226
	12		5.012	2.365	2.583	3.185	3.029				P value	<0.0001
	13		4.464	2.345	2.439	3.159	4.106				P value summary	****											How big is the difference?
	14		4.428	2.614	2.649	3.1	2.812				Are SDs significantly different (P < 0.05)?	Yes											Mean of column C	2.863
	15		3.335	2.331	2.759	3.329	3.061																Mean of column D	2.412
	16		4.37	3.17	2.724	3.793	2.767				Bartlett's test												Difference between means (D - C) ± SEM	-0.4513 ± 0.06145
	17		4.156	3.157	3.311	3.547	3.401				Bartlett's statistic (corrected)	138											95% confidence interval	-0.5724 to -0.3302
	18		4.162	3.408	3.109	3.665	2.563				P value	<0.0001											R squared (eta squared)	0.1927
	19		4.113	2.887	2.435	3.587	2.861				P value summary	****
	20		3.884	2.362	2.581	3.21	2.757				Are SDs significantly different (P < 0.05)?	Yes											F test to compare variances
	21		4.74	3.083	2.738	3.419	3.069																F, DFn, Dfd	3.647, 112, 114
	22		4.498	2.45	2.434	4.583	3.443				ANOVA table	SS	DF	MS	F (DFn, DFd)	P value							P value	<0.0001
	23		4.031	3.208	2.83	3.693	2.843				Treatment (between columns)	133.7	4	33.42	F (4, 579) = 87.99	P<0.0001							P value summary	****
	24		4.41	2.404	2.462	3.413	3.024				Residual (within columns)	220	579	0.3799									Significantly different (P < 0.05)?	Yes
	25		4.9	2.88	2.521	3.882	3.04				Total	353.7	583
	26		4.846	3.02	2.496	3.745	3.251																Data analyzed
	27		3.572	3.411	2.201	3.5	2.96				Data summary												Sample size, column C	113
	28		4.77		2.449	3.719	2.82				Number of treatments (columns)	5											Sample size, column D	115
	29		5.6		2.29		3.167				Number of values (total)	584
	30		4.62		2.196		3.148
Trial 2	1		5.342	2.035	2.1	3.266	2.757
	2		2.935	2.421	2.316	3.157	3.547																UNPAIRED T-TEST
	3		3.431	2.487	2.477	3.45	2.799				MULTIPLE COMPARISON												Table Analyzed	DAPI_AoVNC
	4		4.014	2.355	2.416	3.367	2.697				Number of families	1
	5		4.989	2.64	2.758	3.127	3.251				Number of comparisons per family	4											Column G	nlg-1 (tm474)
	6		4.768	2.178	2.349	2.979	3.076				Alpha	0.05											vs.	vs.
	7		5.361	2.306	2.661	3.242	2.674																Column F	nlg-1 (ok259)
	8		5.17	2.297	2.372	3.424	3.995				Dunnett's multiple comparisons test	Mean Diff.	95.00% CI of diff.	Significant?	Summary	Adjusted P Value	A-?
	9		2.904	3.558	2.9	2.991	3.019				N2 (wildtype) vs. nrx-1 (ok1649)	0.9979	0.7992 to 1.197	Yes	****	<0.0001	C	nrx-1 (ok1649)					Unpaired t test
	10		2.827	2.327	2.187	3.111	2.533				N2 (wildtype) vs. nrx-1 (tm1961)	1.449	1.251 to 1.647	Yes	****	<0.0001	D	nrx-1 (tm1961)					P value	0.5052
	11		3.125	2.262	2.132	3.059	2.593				N2 (wildtype) vs. nlg-1 (ok259)	0.5902	0.3937 to 0.7868	Yes	****	<0.0001	F	nlg-1 (ok259)					P value summary	ns
	12		3.702	2.842	2.056	4.1	2.159				N2 (wildtype) vs. nlg-1 (tm474)	0.6426	0.4469 to 0.8384	Yes	****	<0.0001	G	nlg-1 (tm474)					Significantly different (P < 0.05)?	No
	13		3.062	2.367	2.636	3.281	2.868																One- or two-tailed P value?	Two-tailed
	14		3.316	2.325	2.152	3.087	3.093				Test details	Mean 1	Mean 2	Mean Diff.	SE of diff.	n1	n2	q	DF				t, df	t=0.6674, df=236
	15		3.526	1.836	2.112	3.457	3.077				N2 (wildtype) vs. nrx-1 (ok1649)	3.861	2.863	0.9979	0.08112	118	113	12.3	579
	16		4.238	3.371	2.698	2.376	3.346				N2 (wildtype) vs. nrx-1 (tm1961)	3.861	2.412	1.449	0.08076	118	115	17.94	579				How big is the difference?
	17		4.058	2.852	2.442	2.734	2.289				N2 (wildtype) vs. nlg-1 (ok259)	3.861	3.27	0.5902	0.08024	118	118	7.356	579				Mean of column F	3.27
	18		4.26	3.485	2.153	3.574	3.615				N2 (wildtype) vs. nlg-1 (tm474)	3.861	3.218	0.6426	0.07991	118	120	8.042	579				Mean of column G	3.218
	19		2.945	2.821	2.662	3.669	3.836																Difference between means (G - F) ± SEM	-0.05242 ± 0.07854
	20		4.208	3.405	2.347	3.76	2.817																95% confidence interval	-0.2071 to 0.1023
	21		3.683	3.286	2.442	3.98	3.642																R squared (eta squared)	0.001884
	22		3.692	3.28	2.2	4.146	7.763
	23		4.28	3.029	2.449	3.392	4.022																F test to compare variances
	24		3.822	3.046	2.096	3.933	1.826																F, DFn, Dfd	2.954, 119, 117
	25		4.308	2.915	2.408	3.653	2.342																P value	<0.0001
	26		3.782	3.294	2.388	3.272	2.61																P value summary	****
	27		3.519	2.67	2.216	3.424	4.255																Significantly different (P < 0.05)?	Yes
	28		3.925	3.328	2.559	3.406	4.341
	29		3.539	2.7	2.068	3.496	3.164																Data analyzed
	30		4.325	2.98	2.361	3.878	3.289																Sample size, column F	118
Trial 3	1		3.457	2.086	3.133	2.723	2.807																Sample size, column G	120
	2		3.459	2.032	2.152	2.747	2.196
	3		4.35	2.045	1.949	2.85	2.027
	4		3.095	2.185	2.187	2.811	2.433
	5		4.465	2.662	2.702	3.38	2.961
	6		3.199	2.089	2.843	2.834	2.901
	7		3.085	2.34	2.55	2.674	3.311
	8		2.844	2.231	2.132	3.089	3.365
	9		2.776	2.328	2.621	3.137	4.196
	10		2.601	2.032	1.779	2.98	3.037
	11		3.2	2.815	1.954	3.196	2.941
	12		3.613	2.972	2.292	3.26	2.665
	13		2.762	2.864	2.107	3.702	3.186
	14		2.465	3.277	2.336	2.922	3.457
	15		3.535	3.382	2.026	3.152	4.389
	16		3.859	2.962	3.51	3.802	4.265
	17		3.6	3.445	2.232	3.808	3.025
	18		3.937	2.72	2.237	2.948	2.056
	19		4.264	4.023	2.904	3.651	2.021
	20		3.619	4.124	2.579	2.973	2.682
	21		3.201	3.454	2.369	2.69	3.386
	22		3.759	2.742	2.302	2.719	3.393
	23		3.481	3.68	2.235	2.854	3.985
	24		3.519	4.726	2.201	3.174	4.044
	25		3.386	2.94	2.528	2.787	3.797
	26		3.195	2.784	2.617	3.275	3.074
	27		4.28	3.244	2.679	3.45	4.244
	28		3.069	3.23		3.352	4.937
	29		3.8	3.726		2.93	3.004
	30		2.996	4.07		3.514	3.192
Trial 4	1		4.278	2.419	2.011	3.371	3.096
	2		3.093	2.559	2.581	3.344	3.136
	3		5.202	2.49	2.46	2.992	2.749
	4		3.659	2.785	2.097	2.798	2.707
	5		4.691	2.95	2.135	2.659	2.883
	6		3.64	2.566	2.545	2.671	2.829
	7		3.328	2.086	2.429	3.845	2.838
	8		3.592	2.866	2.191	3.927	4.126
	9		3.987	2.687	2.442	3.502	3.051
	10		4.13	2.295	1.883	3.849	2.714
	11		4.863	2.703	2.263	2.909	2.771
	12		3.006	2.1	2.685	2.822	3.129
	13		3.635	2.214	2.369	3.084	3.774
	14		2.701	3.642	2.324	3.157	3.224
	15		3.446	3.585	2.7	2.425	2.753
	16		2.744	3.655	2.15	3.001	4.471
	17		2.632	2.96	2.342	4.168	3.55
	18		3.336	5.078	2.01	3.093	4.534
	19		3.027	3.405	2.239	4.516	3.524
	20		3.433	3.02	2.247	3.065	3.787
	21		2.995	3.087	1.976	3.72	4.421
	22		2.82	3.061	2.09	3.46	3.345
	23		2.901	3.16	3.133	2.653	3.838
	24		3.303	3.98	2.303	3.506	3.84
	25		2.402	3.242	2.264	2.844	4.647
	26		3.212	3.297	2.679	2.802	3.928
	27		2.77		2.545	3.342	2.61
	28		3.13		2.16	2.976	2.549
	29					2.824	2.689
	30					3.807	2.784

## Sheet: Fig S1-RC
Figure S1		Raw Counts (RC)
Before Normalization																																	After Normalization
	nrx-1 (ok1649)			N2 (WT)						nrx-1 (tm1961)		N2 (WT)						nlg-1 (ok259)		N2 (WT)						nlg-1 (tm474)		N2 (WT)						nrx-1 (ok1649)			N2 (WT)						nrx-1 (tm1961)		N2 (WT)
	S-03	S-02	S-01	S-03	S-02	S-01			S-03	S-02	S-01	S-03	S-02	S-01			S-03	S-02	S-01	S-03	S-02	S-01			S-03	S-02	S-01	S-03	S-02	S-01				S-03	S-02	S-01	S-03	S-02	S-01			S-03	S-02	S-01	S-03	S-02	S-01
WBGene00197333	0	0	0	0	0	0		WBGene00197333	0	0	0	0	0	0		WBGene00197333	0	0	0	0	0	0		WBGene00197333	0	0	0	0	0	0			WBGene00015153	15.9879	44.0651	14.8581	26.0587	56.3378	98.5817		WBGene00015153	13.6525	13.8888	89.5396	30.7899	66.3144	116.965		WBGene00015153
WBGene00198386	0	0	0	0	0	0		WBGene00198386	0	0	0	0	0	0		WBGene00198386	0	0	0	0	0	0		WBGene00198386	0	0	0	0	0	0			WBGene00002061	631.521	984.854	7750.51	3334.14	3802.35	3207.07		WBGene00002061	1611	2429.78	1502.14	3939.49	4475.7	3805.12		WBGene00002061
WBGene00015153	16	40	11	38	63	109		WBGene00015153	12	18	76	38	63	109		WBGene00015153	23	39	9	38	63	109		WBGene00015153	94	10	0	38	63	109			WBGene00001177	407.691	597.082	2558.29	1795.99	2251.72	2513.38		WBGene00235314	9.10167	7.71602	15.316	16.2052	3.15783	11.8038		WBGene00001177
WBGene00002061	632	894	5738	4862	4252	3546		WBGene00002061	1416	3149	1275	4862	4252	3546		WBGene00002061	1144	918	6026	4862	4252	3546		WBGene00002061	3010	2007	2713	4862	4252	3546			WBGene00015152	13.9894	20.9309	8.1044	16.4581	8.04825	11.7575		WBGene00001177	524.484	804.781	1985.19	2122.07	2650.47	2982.07		WBGene00015152
WBGene00255704	1	3	1	1	4	4		WBGene00255704	6	5	7	1	4	4		WBGene00255704	3	2	5	1	4	4		WBGene00255704	6	8	1	1	4	4			WBGene00021412	118.91	172.955	48.6264	41.831	31.2988	42.5077		WBGene00015152	17.0656	15.432	14.1378	19.4463	9.47349	13.95		WBGene00021412
WBGene00235314	8	2	0	20	3	11		WBGene00235314	8	10	13	20	3	11		WBGene00235314	3	10	10	20	3	11		WBGene00235314	20	7	0	20	3	11			WBGene00018976	41.9682	84.8253	128.32	80.2332	263.804	293.032		WBGene00021412	40.9575	39.3517	32.9883	49.4259	36.8414	50.4345		WBGene00018976
WBGene00001177	408	542	1894	2619	2518	2779		WBGene00001177	461	1043	1685	2619	2518	2779		WBGene00001177	683	571	1646	2619	2518	2779		WBGene00001177	3619	819	578	2619	2518	2779			WBGene00004496	3478.36	6824.58	20294.8	18099.8	28724.2	24992.7		WBGene00018976	19.3411	58.6418	177.901	94.8006	310.52	347.676		WBGene00004496
WBGene00169236	2	0	2	8	2	4		WBGene00169236	0	1	1	8	2	4		WBGene00169236	0	2	2	8	2	4		WBGene00169236	10	2	0	8	2	4			WBGene00018975	196.851	317.268	2566.39	946.341	1220.65	1203.78		WBGene00004496	8065.22	12334.1	10584.5	21386	33810.9	29653.3		WBGene00018975
WBGene00219784	4	3	4	6	7	4		WBGene00219784	0	2	1	6	7	4		WBGene00219784	5	3	0	6	7	4		WBGene00219784	4	4	1	6	7	4			WBGene00000480	284.784	399.89	2697.41	1070.46	1533.64	1389.19		WBGene00018975	463.048	641.973	680.972	1118.16	1436.81	1428.26		WBGene00000480
WBGene00015152	14	19	6	24	9	13		WBGene00015152	15	20	12	24	9	13		WBGene00015152	21	31	6	24	9	13		WBGene00015152	23	14	0	24	9	13			WBGene00020999	334.746	441.752	2589.36	1687.64	1899.39	1865.82		WBGene00000480	443.707	734.565	1062.69	1264.82	1805.23	1648.24		WBGene00020999
WBGene00015151	0	0	0	0	0	0		WBGene00015151	0	0	0	0	0	0		WBGene00015151	0	0	0	0	0	0		WBGene00015151	0	1	0	0	0	0			WBGene00021000	82.9371	79.3171	249.886	154.295	134.138	133.854		WBGene00020999	506.281	943.67	856.517	1994.05	2235.74	2213.75		WBGene00021000
WBGene00021413	0	0	0	0	0	0		WBGene00021413	0	9	0	0	0	0		WBGene00021413	0	0	0	0	0	0		WBGene00021413	3	1	1	0	0	0			WBGene00021004	281.786	434.041	3106.69	1139.04	1737.53	1559.22		WBGene00021000	116.046	173.61	103.677	182.309	157.892	158.815		WBGene00021004
WBGene00021412	119	157	36	61	35	47		WBGene00021412	36	51	28	61	35	47		WBGene00021412	231	176	52	61	35	47		WBGene00021412	60	39	13	61	35	47			WBGene00021001	69.947	91.435	29.7161	91.2053	144.869	83.2066		WBGene00021004	455.084	737.652	837.667	1345.84	2045.22	1849.98		WBGene00021001
WBGene00021414	0	1	0	0	0	0		WBGene00021414	1	0	0	0	0	0		WBGene00021414	1	0	0	0	0	0		WBGene00021414	0	0	0	0	0	0			WBGene00044512	9.99243	17.626	31.0669	56.9176	31.2988	25.3237		WBGene00021001	100.118	87.9627	121.35	107.765	170.523	98.7228		WBGene00044512
WBGene00018976	42	77	95	117	295	324		WBGene00018976	17	76	151	117	295	324		WBGene00018976	111	98	51	117	295	324		WBGene00018976	377	45	18	117	295	324			WBGene00021002	98.925	153.126	97.2528	264.015	299.574	142.898		WBGene00044512	12.5148	31.6357	35.3446	67.2517	36.8414	30.0461		WBGene00021002
WBGene00199654	0	0	0	0	0	0		WBGene00199654	0	0	0	0	0	0		WBGene00199654	0	0	0	0	0	0		WBGene00199654	0	0	0	0	0	0			WBGene00006648	199.849	233.545	1441.23	750.901	835.23	709.969		WBGene00021002	48.9215	72.5306	57.7295	311.951	352.624	169.546		WBGene00006648
WBGene00200227	0	0	0	0	0	0		WBGene00200227	0	0	0	0	0	0		WBGene00200227	0	0	0	0	0	0		WBGene00200227	0	0	0	0	0	0			WBGene00022435	28.978	62.7927	86.4469	54.1746	50.9723	78.6845		WBGene00006648	471.012	601.85	444.164	887.236	983.138	842.363		WBGene00022435
WBGene00169451	0	2	0	0	0	0		WBGene00169451	1	0	0	0	0	0		WBGene00169451	0	0	0	0	0	0		WBGene00169451	0	0	0	0	0	0			WBGene00022434	331.749	266.594	418.727	352.478	259.333	222.487		WBGene00022435	47.7838	61.7282	62.4421	64.0106	59.9988	93.3575		WBGene00022434
WBGene00004496	3481	6195	15025	26394	32121	27634		WBGene00004496	7089	15985	8984	26394	32121	27634		WBGene00004496	3318	3860	11759	26394	32121	27634		WBGene00004496	21703	7726	9536	26394	32121	27634			WBGene00000838	541.59	775.545	5448.86	2852.74	3205.89	3310.17		WBGene00022434	523.346	486.109	217.958	416.474	305.257	263.976		WBGene00235163
WBGene00018975	197	288	1900	1380	1365	1331		WBGene00018975	407	832	578	1380	1365	1331		WBGene00018975	399	353	2062	1380	1365	1331		WBGene00018975	1623	545	748	1380	1365	1331			WBGene00044689	301.771	345.911	3563.23	1274.13	1444.21	1372.91		WBGene00235163	30.7181	19.2901	22.3849	12.1539	8.42088	6.43845		WBGene00000838
WBGene00000480	285	363	1997	1561	1715	1536		WBGene00000480	390	952	902	1561	1715	1536		WBGene00000480	315	338	1994	1561	1715	1536		WBGene00000480	1900	478	691	1561	1715	1536			WBGene00077643	72.9447	94.7399	301.214	183.782	174.379	203.494		WBGene00000838	1229.86	1567.12	1881.51	3370.69	3773.61	3927.45		WBGene00044689
WBGene00020999	335	401	1917	2461	2124	2063		WBGene00020999	445	1223	727	2461	2124	2063		WBGene00020999	589	547	2051	2461	2124	2063		WBGene00020999	1871	569	823	2461	2124	2063			WBGene00017080	521.605	658.773	999.543	783.817	886.202	916.177		WBGene00044689	440.293	750.769	639.737	1505.47	1699.97	1628.93		WBGene00077643
WBGene00021000	83	72	185	225	150	148		WBGene00021000	102	225	88	225	150	148		WBGene00021000	79	90	200	225	150	148		WBGene00021000	130	134	77	225	150	148			WBGene00017082	166.874	165.244	59.4323	20.5726	39.347	53.3607		WBGene00077643	166.106	251.542	184.97	217.15	205.259	241.442		WBGene00017080
WBGene00021004	282	394	2300	1661	1943	1724		WBGene00021004	400	956	711	1661	1943	1724		WBGene00021004	453	437	2155	1661	1943	1724		WBGene00021004	2782	588	871	1661	1943	1724			WBGene00019818	101.923	109.061	16.2088	21.9441	23.2505	24.4193		WBGene00017080	868.072	1012.34	1317.17	926.129	1043.14	1087.02		WBGene00017082
WBGene00021001	70	83	22	133	162	92		WBGene00021001	88	114	103	133	162	92		WBGene00021001	74	96	12	133	162	92		WBGene00021001	64	51	5	133	162	92			WBGene00255728	7.99394	16.5244	1.35073	19.2011	18.7793	22.6105		WBGene00017082	196.824	105.71	81.2925	24.3078	46.3148	63.3114		WBGene00019818
WBGene00044512	10	16	23	83	35	28		WBGene00044512	11	41	30	83	35	28		WBGene00044512	19	15	17	83	35	28		WBGene00044512	39	29	9	83	35	28			WBGene00019816	62.9523	91.435	94.5513	154.295	114.464	168.222		WBGene00019818	55.7477	23.9197	32.9883	25.9284	27.3679	28.973		WBGene00255728
WBGene00021003	7	1	1	9	5	8		WBGene00021003	4	9	6	9	5	8		WBGene00021003	0	0	2	9	5	8		WBGene00021003	3	1	0	9	5	8			WBGene00021981	92.9296	123.382	44.5742	93.9483	152.023	158.273		WBGene00255728	2.27542	6.94442	14.1378	22.6873	22.1048	26.8269		WBGene00019816
WBGene00023356	0	0	0	0	0	0		WBGene00023356	7	0	0	0	0	0		WBGene00023356	0	0	0	0	0	0		WBGene00023356	0	0	0	0	0	0			WBGene00044513	50.9614	41.8618	5.40293	41.831	37.5585	42.5077		WBGene00019816	70.538	98.7651	183.792	182.309	134.734	199.592		WBGene00021981
WBGene00005302	0	0	1	0	0	0		WBGene00005302	0	0	0	0	0	0		WBGene00005302	0	0	0	0	0	0		WBGene00005302	0	0	0	0	0	0			WBGene00021983	26.9796	64.996	163.439	115.207	198.524	256.855		WBGene00021981	130.837	106.481	81.2925	111.006	178.944	187.788		WBGene00044513
WBGene00170056	0	0	0	0	0	0		WBGene00170056	0	0	0	0	0	0		WBGene00170056	0	0	0	0	0	0		WBGene00170056	0	0	0	0	0	0			WBGene00018010	112.914	138.805	1311.56	728.957	662.64	559.836		WBGene00044513	48.9215	30.8641	130.775	49.4259	44.2096	50.4345		WBGene00021983
WBGene00005303	0	0	0	1	0	0		WBGene00005303	0	0	0	1	0	0		WBGene00005303	0	4	0	1	0	0		WBGene00005303	0	2	0	1	0	0			WBGene00018011	321.756	299.642	1846.45	822.905	806.614	664.748		WBGene00021983	31.8559	100.308	204.999	136.124	233.679	304.753		WBGene00018010
WBGene00021002	99	139	72	385	335	158		WBGene00021002	43	94	49	385	335	158		WBGene00021002	93	111	62	385	335	158		WBGene00021002	439	99	15	385	335	158			WBGene00018013	352.733	350.317	1885.62	1173.33	838.807	802.22		WBGene00018010	303.768	396.604	282.757	861.308	779.984	664.233		WBGene00018011
WBGene00006648	200	212	1067	1095	934	785		WBGene00006648	414	780	377	1095	934	785		WBGene00006648	350	296	1203	1095	934	785		WBGene00006648	996	605	528	1095	934	785			WBGene00003614	25.9803	37.4553	28.3654	36.345	33.0873	55.1696		WBGene00018011	736.098	821.756	470.083	972.313	949.454	788.71		WBGene00018013
WBGene00022435	29	57	64	79	57	87		WBGene00022435	42	80	53	79	57	87		WBGene00022435	39	40	63	79	57	87		WBGene00022435	204	91	43	79	57	87			WBGene00000022	142.892	272.102	2267.88	895.595	1725.9	1730.15		WBGene00018013	616.638	904.318	557.266	1386.36	987.348	951.817		WBGene00003614
WBGene00022434	332	242	310	514	290	246		WBGene00022434	460	630	185	514	290	246		WBGene00022434	253	242	318	514	290	246		WBGene00022434	292	353	119	514	290	246			WBGene00020708	5.99546	9.91464	47.2757	11.6578	42.924	82.3022		WBGene00003614	92.1544	52.469	48.3043	42.9438	38.9466	65.4575		WBGene00000022
WBGene00235163	12	15	4	15	8	6		WBGene00235163	27	25	19	15	8	6		WBGene00235163	29	28	2	15	8	6		WBGene00235163	16	20	2	15	8	6			WBGene00020707	16.9871	85.9269	117.514	252.358	584.84	543.556		WBGene00000022	251.434	463.733	894.218	1058.2	2031.54	2052.79		WBGene00020708
WBGene00201724	0	0	0	0	0	0		WBGene00201724	0	0	0	0	0	0		WBGene00201724	0	0	0	0	0	0		WBGene00201724	0	0	0	0	0	0			WBGene00020706	316.76	420.821	3114.79	2115.55	1779.56	1596.3		WBGene00020708	9.10167	21.6049	82.4707	13.7744	50.5253	97.6498		WBGene00020707
WBGene00202280	0	0	0	0	0	0		WBGene00202280	0	0	0	0	0	0		WBGene00202280	0	0	0	0	0	0		WBGene00202280	0	0	0	0	0	0			WBGene00020705	308.766	272.102	687.523	683.011	596.465	549.887		WBGene00020707	32.9936	70.2158	374.653	298.176	688.407	644.918		WBGene00020706
WBGene00000838	542	704	4034	4160	3585	3660		WBGene00000838	1081	2031	1597	4160	3585	3660		WBGene00000838	989	1012	4721	4160	3585	3660		WBGene00000838	3665	1426	1628	4160	3585	3660			WBGene00021451	1.99849	6.60976	16.2088	15.0866	25.039	26.2282		WBGene00020706	662.147	915.12	1703.61	2499.66	2094.69	1893.98		WBGene00020705
WBGene00044689	302	314	2638	1858	1615	1518		WBGene00044689	387	973	543	1858	1615	1518		WBGene00044689	255	242	2522	1858	1615	1518		WBGene00044689	1525	461	976	1858	1615	1518			WBGene00022643	214.837	268.797	498.421	1058.8	989.041	662.939		WBGene00020705	482.389	506.171	473.617	807.02	702.091	652.429		WBGene00021451
WBGene00077643	73	86	223	268	195	225		WBGene00077643	146	326	157	268	195	225		WBGene00077643	123	96	292	268	195	225		WBGene00077643	310	141	91	268	195	225			WBGene00022642	3761.15	3759.85	8293.5	9126.7	8166.29	10986		WBGene00021451	9.10167	6.17282	14.1378	17.8257	29.4731	31.1192		WBGene00022643
WBGene00017080	522	598	740	1143	991	1013		WBGene00017080	763	1312	1118	1143	991	1013		WBGene00017080	611	644	765	1143	991	1013		WBGene00017080	979	661	357	1143	991	1013			WBGene00022641	9.99243	4.40651	0	4.80028	10.731	27.1326		WBGene00022643	212.752	361.881	594.967	1251.04	1164.19	786.563		WBGene00022642
WBGene00017082	167	150	44	30	44	59		WBGene00017082	173	137	69	30	44	59		WBGene00017082	128	136	24	30	44	59		WBGene00017082	118	151	22	30	44	59			WBGene00022644	1304.01	1825.4	4054.9	1554.6	4570.51	3406.95		WBGene00022642	5256.22	6969.11	17382.5	10783.8	9612.44	13034.6		WBGene00022641
WBGene00005299	0	0	1	3	0	3		WBGene00005299	3	1	1	3	0	3		WBGene00005299	0	3	0	3	0	3		WBGene00005299	5	0	0	3	0	3			WBGene00022645	2647.99	3182.6	3948.19	696.04	2796.32	3245.06		WBGene00022641	3.41313	10.0308	2.35631	5.67183	12.6313	32.1922		WBGene00022644
WBGene00005301	0	0	0	0	0	0		WBGene00005301	0	0	0	0	0	0		WBGene00005301	0	0	0	0	0	0		WBGene00005301	0	0	0	0	0	0			WBGene00021448	40.969	67.1992	43.2235	34.2877	34.8758	61.5005		WBGene00022644	2745.29	5928.99	1621.14	1836.86	5379.89	4042.27		WBGene00022645
WBGene00005298	1	0	0	0	0	0		WBGene00005298	0	1	1	0	0	0		WBGene00005298	0	0	0	0	0	0		WBGene00005298	0	0	0	0	0	0			WBGene00015258	39.9697	44.0651	27.0147	30.8589	30.4045	73.258		WBGene00022645	3557.62	4682.08	999.074	822.415	3291.51	3850.19		WBGene00021448
WBGene00017083	0	1	15	9	2	7		WBGene00017083	3	5	5	9	2	7		WBGene00017083	0	1	25	9	2	7		WBGene00017083	11	7	18	9	2	7			WBGene00015260	12.9902	20.9309	5.40293	5.48603	16.0965	17.184		WBGene00021448	42.0952	84.8762	51.8387	40.5131	41.0518	72.969		WBGene00015258
WBGene00019814	2	0	2	3	0	0		WBGene00019814	1	5	0	3	0	0		WBGene00019814	0	1	18	3	0	0		WBGene00019814	0	8	4	3	0	0			WBGene00019744	348.736	328.285	357.944	466.999	664.428	792.271		WBGene00015258	27.305	33.9505	121.35	36.4618	35.7887	86.919		WBGene00015257
WBGene00019817	3	0	5	2	0	0		WBGene00019817	14	5	0	2	0	0		WBGene00019817	0	1	8	2	0	0		WBGene00019817	0	15	8	2	0	0			WBGene00003713	23.9818	18.7277	13.5073	10.2863	8.9425	18.0884		WBGene00015260	12.5148	5.40122	30.632	6.48209	18.947	20.3884		WBGene00015260
WBGene00019818	102	99	12	32	26	27		WBGene00019818	49	31	28	32	26	27		WBGene00019818	31	53	9	32	26	27		WBGene00019818	32	31	10	32	26	27			WBGene00003688	47.9637	41.8618	63.4845	39.7737	32.193	30.7503		WBGene00019744	844.18	670.522	716.317	551.788	782.089	940.013		WBGene00019744
WBGene00255728	8	15	1	28	21	25		WBGene00255728	2	9	12	28	21	25		WBGene00255728	13	28	1	28	21	25		WBGene00255728	26	3	0	28	21	25			WBGene00019743	95.9273	124.484	32.4176	43.2025	52.7608	47.0298		WBGene00003713	20.4788	30.0925	20.0286	12.1539	10.5261	21.4615		WBGene00003713
WBGene00019815	0	0	8	3	5	0		WBGene00019815	1	0	0	3	5	0		WBGene00019815	0	0	6	3	5	0		WBGene00019815	0	5	13	3	5	0			WBGene00019742	53.9591	98.0448	45.9249	58.2891	33.0873	47.9342		WBGene00003688	45.5084	26.2345	53.0169	46.9951	37.894	36.4845		WBGene00003688
WBGene00006419	0	0	1	0	0	0		WBGene00006419	1	0	0	0	0	0		WBGene00006419	0	0	0	0	0	0		WBGene00006419	3	0	1	0	0	0			WBGene00019741	108.917	105.756	33.7683	60.3464	40.2413	50.6475		WBGene00019743	127.423	74.8454	44.7698	51.0465	62.104	55.7999		WBGene00019743
WBGene00006172	1	2	2	1	2	0		WBGene00006172	4	2	3	1	2	0		WBGene00006172	3	7	1	1	2	0		WBGene00006172	0	8	0	1	2	0			WBGene00003689	54.9584	79.3171	24.3132	164.581	67.963	78.6845		WBGene00019742	96.7053	59.4134	118.993	68.8722	38.9466	56.8729		WBGene00019742
WBGene00019816	63	83	70	225	128	186		WBGene00019816	62	128	156	225	128	186		WBGene00019816	63	101	84	225	128	186		WBGene00019816	173	87	34	225	128	186			WBGene00003645	154.883	128.89	240.431	245.5	197.629	222.487		WBGene00019741	96.7053	54.7838	197.93	71.303	47.3675	60.0922		WBGene00019741
WBGene00021981	93	112	33	137	170	175		WBGene00021981	115	138	69	137	170	175		WBGene00021981	270	217	65	137	170	175		WBGene00021981	176	169	29	137	170	175			WBGene00003720	282.786	194.988	91.8499	244.128	151.128	195.355		WBGene00003689	111.495	91.0491	235.631	194.463	79.9984	93.3575		WBGene00003689
WBGene00044513	51	38	4	61	42	47		WBGene00044513	43	40	111	61	42	47		WBGene00044513	43	48	12	61	42	47		WBGene00044513	22	24	4	61	42	47			WBGene00020153	29.9773	59.4878	52.6786	82.2905	39.347	44.3165		WBGene00003645	189.997	223.765	246.234	290.074	232.627	263.976		WBGene00003645
WBGene00021983	27	59	121	168	222	284		WBGene00021983	28	130	174	168	222	284		WBGene00021983	53	57	118	168	222	284		WBGene00021983	383	43	47	168	222	284			WBGene00020152	27.9788	40.7602	56.7308	56.9176	36.6643	26.2282		WBGene00003720	329.936	193.672	590.255	288.453	177.891	231.784		WBGene00003720
WBGene00018010	113	126	971	1063	741	619		WBGene00018010	267	514	240	1063	741	619		WBGene00018010	108	104	1179	1063	741	619		WBGene00018010	463	278	445	1063	741	619			WBGene00003696	129.902	134.398	70.2381	91.2053	64.386	92.2508		WBGene00020153	54.61	67.1294	90.7178	97.2313	46.3148	52.5806		WBGene00020153
WBGene00018011	322	272	1367	1200	902	735		WBGene00018011	647	1065	399	1200	902	735		WBGene00018011	209	204	1564	1200	902	735		WBGene00018011	762	566	570	1200	902	735			WBGene00003721	78.9402	56.183	170.192	197.497	152.023	177.266		WBGene00020152	36.4067	40.8949	90.7178	67.2517	43.157	31.1192		WBGene00020152
WBGene00018013	353	318	1396	1711	938	887		WBGene00018013	542	1172	473	1711	938	887		WBGene00018013	299	339	1369	1711	938	887		WBGene00018013	810	518	493	1711	938	887			WBGene00004144	326.752	148.72	145.879	128.922	59.9148	58.7873		WBGene00003696	225.266	111.111	217.958	107.765	75.7879	109.454		WBGene00003696
WBGene00219932	2	7	7	8	5	7		WBGene00219932	20	6	8	8	5	7		WBGene00219932	6	4	15	8	5	7		WBGene00219932	8	7	1	8	5	7			WBGene00020014	151.885	250.069	5.40293	8.22905	40.2413	70.5447		WBGene00003721	144.489	184.413	250.947	233.355	178.944	210.323		WBGene00003721
WBGene00003614	26	34	21	53	37	61		WBGene00003614	81	68	41	53	37	61		WBGene00003614	36	52	59	53	37	61		WBGene00003614	61	56	34	53	37	61			WBGene00020015	82.9371	83.7236	44.5742	34.2877	39.347	25.3237		WBGene00004144	558.615	186.728	62.4421	152.329	70.5249	69.7498		WBGene00004144
WBGene00000022	143	247	1679	1306	1930	1913		WBGene00000022	221	601	759	1306	1930	1913		WBGene00000022	309	210	1238	1306	1930	1913		WBGene00000022	2220	379	686	1306	1930	1913			WBGene00020016	26.9796	13.2195	2.70147	208.469	68.8573	72.3535		WBGene00020014	17.0656	56.327	240.343	9.72313	47.3675	83.6998		WBGene00020014
WBGene00044750	0	0	0	0	0	0		WBGene00044750	0	0	0	0	0	0		WBGene00044750	0	0	0	0	0	0		WBGene00044750	0	0	0	0	0	0			WBGene00003648	199.849	223.63	56.7308	169.381	118.041	261.377		WBGene00020015	55.7477	61.7282	84.827	40.5131	46.3148	30.0461		WBGene00020015
WBGene00020708	6	9	35	17	48	91		WBGene00020708	8	28	70	17	48	91		WBGene00020708	37	19	10	17	48	91		WBGene00020708	101	12	5	17	48	91			WBGene00003722	140.893	102.451	63.4845	80.919	54.5493	79.5889		WBGene00020016	15.9279	17.7469	379.365	246.319	81.051	85.8459		WBGene00020016
WBGene00020707	17	78	87	368	654	601		WBGene00020707	29	91	318	368	654	601		WBGene00020707	142	166	47	368	654	601		WBGene00020707	767	68	7	368	654	601			WBGene00015759	500.621	811.899	1853.21	1852.91	2316.11	1994.24		WBGene00003648	276.463	148.148	754.018	200.135	138.945	310.118		WBGene00003648
WBGene00020706	317	382	2306	3085	1990	1765		WBGene00020706	582	1186	1446	3085	1990	1765		WBGene00020706	509	560	3051	3085	1990	1765		WBGene00020706	1598	761	782	3085	1990	1765			WBGene00015758	14.9886	0	1.35073	0	25.9333	62.4049		WBGene00003722	110.358	97.9935	197.93	95.6108	64.2092	94.4305		WBGene00003722
WBGene00020705	309	247	509	996	667	608		WBGene00020705	424	656	402	996	667	608		WBGene00020705	286	322	426	996	667	608		WBGene00020705	532	312	170	996	667	608			WBGene00015760	0	0	0	2.05726	24.1448	33.4635		WBGene00015759	1838.54	1976.07	1126.31	2189.33	2726.26	2366.13		WBGene00015759
WBGene00021450	0	6	0	0	1	2		WBGene00021450	4	1	0	0	1	2		WBGene00021450	0	3	0	0	1	2		WBGene00021450	2	1	0	0	1	2			WBGene00015756	99.9243	182.87	609.181	711.813	556.224	629.476		WBGene00015758	5.68855	1.5432	96.6085	0	30.5257	74.0421		WBGene00015758
WBGene00021449	0	0	6	1	0	0		WBGene00021449	0	0	1	1	0	0		WBGene00021449	0	0	2	1	0	0		WBGene00021449	2	0	4	1	0	0			WBGene00019450	0	0	0	7.5433	91.2135	134.758		WBGene00015757	0	0	48.3043	0	11.5787	34.3384		WBGene00015760
WBGene00196358	0	0	0	1	0	0		WBGene00196358	0	0	0	1	0	0		WBGene00196358	0	0	0	1	0	0		WBGene00196358	1	0	0	1	0	0			WBGene00019449	0	0	0	6.85754	53.655	76.8756		WBGene00015760	2.27542	0	101.321	2.43078	28.4205	39.7037		WBGene00015756
WBGene00021451	2	6	12	22	28	29		WBGene00021451	8	8	12	22	28	29		WBGene00021451	5	5	4	22	28	29		WBGene00021451	38	18	6	22	28	29			WBGene00003680	182.861	131.094	89.1484	181.039	82.271	133.854		WBGene00015762	0	0	87.1833	3.24104	12.6313	33.2653		WBGene00019450
WBGene00201032	0	0	0	0	1	0		WBGene00201032	0	2	0	0	1	0		WBGene00201032	0	0	0	0	1	0		WBGene00201032	0	2	0	0	1	0			WBGene00018615	179.864	208.207	48.6264	44.574	49.1838	50.6475		WBGene00015756	226.404	300.153	341.664	841.051	654.724	746.86		WBGene00019449
WBGene00022643	215	244	369	1544	1106	733		WBGene00022643	187	469	505	1544	1106	733		WBGene00022643	460	347	296	1544	1106	733		WBGene00022643	683	408	145	1544	1106	733			WBGene00018616	125.905	350.317	312.019	519.802	1094.56	986.721		WBGene00019450	3.41313	0	543.128	8.91287	107.366	159.888		WBGene00004176
WBGene00022642	3764	3413	6140	13309	9132	12147		WBGene00022642	4620	9032	14754	13309	9132	12147		WBGene00022642	3181	4535	8417	13309	9132	12147		WBGene00022642	11970	4228	4139	13309	9132	12147			WBGene00018619	58.9553	181.768	37.8205	114.521	150.234	122.097		WBGene00019449	0	0	234.452	8.10261	63.1566	91.2113		WBGene00003680
WBGene00022641	10	4	0	7	12	30		WBGene00022641	3	13	2	7	12	30		WBGene00022641	4	7	8	7	12	30		WBGene00022641	22	8	2	7	12	30			WBGene00003673	82.9371	52.8781	25.6639	31.5447	25.039	28.9414		WBGene00004177	30.7181	13.1172	9.42522	1.62052	0	9.65767		WBGene00018615
WBGene00022640	0	0	0	0	1	0		WBGene00022640	0	4	1	0	1	0		WBGene00022640	0	0	0	0	1	0		WBGene00022640	0	1	0	0	1	0			WBGene00018621	11.9909	1.10163	17.5595	106.978	58.1263	34.3679		WBGene00004176	52.3346	13.8888	10.6034	4.05131	7.36827	7.51152		WBGene00018616
WBGene00022639	2	0	1	1	2	1		WBGene00022639	1	0	2	1	2	1		WBGene00022639	1	0	0	1	2	1		WBGene00022639	0	0	0	1	2	1			WBGene00018622	36.972	46.2683	24.3132	52.1173	52.7608	40.6989		WBGene00003680	228.68	189.043	331.061	213.909	96.8401	158.815		WBGene00018619
WBGene00022638	2	1	3	4	0	0		WBGene00022638	9	3	0	4	0	0		WBGene00022638	0	0	3	4	0	0		WBGene00022638	0	5	4	4	0	0			WBGene00017959	46.9644	101.35	21.6117	20.5726	24.1448	15.3751		WBGene00018624	42.0952	12.3456	12.9597	0	2.10522	1.07307		WBGene00003673
WBGene00005284	0	0	0	0	0	0		WBGene00005284	0	0	0	0	0	0		WBGene00005284	0	0	0	0	0	0		WBGene00005284	0	0	0	0	0	0			WBGene00017963	33.9743	106.858	1.35073	1.37151	19.6735	11.7575		WBGene00018615	178.62	131.944	187.326	52.667	57.8936	60.0922		WBGene00018621
WBGene00022637	0	0	1	0	0	0		WBGene00022637	0	1	0	0	0	0		WBGene00022637	0	0	0	0	0	0		WBGene00022637	3	0	0	0	0	0			WBGene00017961	51.9606	22.0325	51.3279	95.3198	59.9148	72.3535		WBGene00018616	88.7413	387.344	516.031	614.178	1288.39	1170.72		WBGene00018614
WBGene00022636	0	0	0	0	0	0		WBGene00022636	0	0	0	0	0	0		WBGene00022636	0	0	0	0	0	0		WBGene00022636	0	0	0	0	0	0			WBGene00017962	278.789	306.252	307.967	26.0587	94.7905	123.001		WBGene00018619	51.1969	118.055	280.4	135.314	176.839	144.865		WBGene00018622
WBGene00219773	5	1	0	2	0	0		WBGene00219773	5	3	2	2	0	0		WBGene00219773	4	4	0	2	0	0		WBGene00219773	3	7	0	2	0	0			WBGene00017957	264.799	333.793	110.76	199.554	169.013	186.31		WBGene00003673	51.1969	40.8949	118.993	37.272	29.4731	34.3384		WBGene00017959
WBGene00022644	1305	1657	3002	2267	5111	3767		WBGene00022644	2413	7684	1376	2267	5111	3767		WBGene00022644	2382	1252	1685	2267	5111	3767		WBGene00022644	6498	1877	1053	2267	5111	3767			WBGene00019244	25.9803	63.8943	488.965	209.841	268.275	233.34		WBGene00018621	10.2394	16.2036	28.2757	126.401	68.4197	40.7768		WBGene00017963
WBGene00022645	2650	2889	2923	1015	3127	3588		WBGene00022645	3127	6068	848	1015	3127	3588		WBGene00022645	4830	3252	1567	1015	3127	3588		WBGene00022645	5417	2559	1254	1015	3127	3588			WBGene00021709	413.686	454.972	259.341	160.466	189.581	257.76		WBGene00018614	48.9215	11.574	67.1547	11.3437	3.15783	6.43845		WBGene00017961
WBGene00021448	41	61	32	50	39	68		WBGene00021448	37	110	44	50	39	68		WBGene00021448	22	35	29	50	39	68		WBGene00021448	91	44	19	50	39	68			WBGene00001564	2451.14	3781.88	9776.61	33962	20446.1	35677.5		WBGene00018622	48.9215	42.4381	82.4707	61.5798	62.104	48.2883		WBGene00017962
WBGene00015259	1	16	6	5	1	2		WBGene00015259	0	5	4	5	1	2		WBGene00015259	2	7	2	5	1	2		WBGene00015259	10	5	0	5	1	2			WBGene00005228	67.9485	27.5407	9.45513	57.6034	7.154	28.037		WBGene00017959	34.1313	35.4937	47.1261	24.3078	28.4205	18.2423		WBGene00017957
WBGene00015258	40	40	20	45	34	81		WBGene00015258	24	44	103	45	34	81		WBGene00015258	27	78	23	45	34	81		WBGene00015258	69	46	4	45	34	81			WBGene00005642	88.9326	67.1992	199.909	183.096	140.397	151.942		WBGene00017963	9.10167	19.2901	34.1664	1.62052	23.1574	13.95		WBGene00019244
WBGene00015257	0	8	0	1	5	17		WBGene00015257	2	3	6	1	5	17		WBGene00015257	19	32	0	1	5	17		WBGene00015257	9	2	0	1	5	17			WBGene00005643	484.633	64.996	707.784	294.189	118.935	55.1696		WBGene00017961	59.1609	28.5493	75.4018	112.626	70.5249	85.8459		WBGene00021709
WBGene00015255	0	0	0	0	0	0		WBGene00015255	0	3	2	0	0	0		WBGene00015255	0	2	0	0	0	0		WBGene00015255	3	0	0	0	0	0			WBGene00019983	650.507	937.484	4339.91	2238.3	3701.3	3381.62		WBGene00017962	453.946	271.604	71.8673	30.7899	111.577	145.938		WBGene00019242
WBGene00170618	0	0	0	0	0	0		WBGene00170618	0	0	0	0	0	0		WBGene00170618	0	0	0	0	0	0		WBGene00170618	0	0	0	0	0	0			WBGene00044514	28.978	8.81301	2.70147	11.6578	6.25975	14.4707		WBGene00017957	324.247	411.264	505.428	235.786	198.943	221.053		WBGene00001564
WBGene00015260	13	19	4	8	18	19		WBGene00015260	11	7	26	8	18	19		WBGene00015260	24	14	5	8	18	19		WBGene00015260	42	12	8	8	18	19			WBGene00020058	166.874	218.122	64.8352	76.8045	79.5883	68.7359		WBGene00019244	81.9151	159.722	121.35	247.94	315.783	276.853		WBGene00219801
WBGene00015254	0	0	0	0	0	0		WBGene00015254	0	0	5	0	0	0		WBGene00015254	0	6	0	0	0	0		WBGene00015254	0	0	0	0	0	0			WBGene00019561	470.643	488.021	270.147	477.971	387.21	240.576		WBGene00021709	632.566	413.579	342.842	189.601	223.153	305.826		WBGene00005228
WBGene00005256	0	0	0	1	0	0		WBGene00005256	0	4	0	1	0	0		WBGene00005256	0	0	3	1	0	0		WBGene00005256	0	3	1	1	0	0			WBGene00019562	48.9629	57.2846	12.1566	97.3771	128.772	117.575		WBGene00019242	3.41313	4.62961	36.5227	4.05131	5.26305	19.3153		WBGene00005642
WBGene00005257	0	0	1	0	0	1		WBGene00005257	1	0	0	0	0	1		WBGene00005257	0	0	1	0	0	1		WBGene00005257	2	0	0	0	0	1			WBGene00019563	33.9743	55.0813	33.7683	35.6592	54.5493	56.9784		WBGene00001564	5173.16	4463.72	57178.1	40128.2	24066.9	42330.6		WBGene00005643
WBGene00005258	1	0	1	4	1	0		WBGene00005258	3	2	2	4	1	0		WBGene00005258	2	4	0	4	1	0		WBGene00005258	3	3	0	4	1	0			WBGene00019556	33.9743	76.0122	20.261	85.0335	95.6848	73.258		WBGene00219801	26.1673	16.9752	30.632	2.43078	2.10522	5.36537		WBGene00019983
WBGene00019744	349	298	265	681	743	876		WBGene00019744	742	869	608	681	743	876		WBGene00019744	295	577	268	681	743	876		WBGene00019744	562	537	192	681	743	876			WBGene00020155	286.783	489.122	1153.53	974.457	1376.25	1829.64		WBGene00005228	67.1248	43.9813	213.246	68.0619	8.42088	33.2653		WBGene00044514
WBGene00003713	24	17	10	15	10	20		WBGene00003713	18	39	17	15	10	20		WBGene00003713	41	34	16	15	10	20		WBGene00003713	17	26	1	15	10	20			WBGene00020156	73.944	92.5366	114.812	47.317	106.416	129.332		WBGene00005642	113.771	99.5367	316.923	216.34	165.26	180.276		WBGene00020058
WBGene00003688	48	38	47	58	36	34		WBGene00003688	40	34	45	58	36	34		WBGene00003688	24	30	13	58	36	34		WBGene00003688	63	43	20	58	36	34			WBGene00044777	89.9318	132.195	91.8499	153.609	195.841	139.281		WBGene00005643	717.894	584.874	110.746	347.602	139.997	65.4575		WBGene00019561
WBGene00019743	96	113	24	63	59	52		WBGene00019743	112	97	38	63	59	52		WBGene00019743	112	120	39	63	59	52		WBGene00019743	68	128	26	63	59	52			WBGene00044776	212.839	129.992	54.0293	57.6034	55.4435	60.5961		WBGene00019983	1177.53	1673.61	1360.77	2644.69	4356.75	4012.22		WBGene00019562
WBGene00019742	54	89	34	85	37	53		WBGene00019742	85	77	101	85	37	53		WBGene00019742	53	83	30	85	37	53		WBGene00019742	51	88	32	85	37	53			WBGene00020157	14.9886	16.5244	36.4698	24.0014	17.885	25.3237		WBGene00044514	62.574	10.0308	10.6034	13.7744	7.36827	17.1692		WBGene00019563
WBGene00019741	109	96	25	88	45	56		WBGene00019741	85	71	168	88	45	56		WBGene00019741	87	142	40	88	45	56		WBGene00019741	77	133	11	88	45	56			WBGene00003550	20.9841	34.1504	45.9249	37.0307	37.5585	62.4049		WBGene00020058	207.063	153.549	177.901	90.7493	93.6823	81.5536		WBGene00019556
WBGene00019745	3	0	0	0	0	1		WBGene00019745	0	0	0	0	0	1		WBGene00019745	3	0	0	0	0	1		WBGene00019745	0	4	0	0	0	1			WBGene00001480	217.835	203.801	312.019	497.858	287.054	479.342		WBGene00019561	617.776	541.665	378.187	564.752	455.78	285.438		WBGene00020155
WBGene00019740	0	0	1	0	0	4		WBGene00019740	0	0	7	0	0	4		WBGene00019740	1	1	0	0	0	4		WBGene00019740	0	2	0	0	0	4			WBGene00019241	1331.99	1182.05	1722.19	1414.03	1466.57	1549.27		WBGene00019562	28.4427	65.5862	83.6489	115.057	151.576	139.5		WBGene00020156
WBGene00003689	55	72	18	240	76	87		WBGene00003689	98	118	200	240	76	87		WBGene00003689	87	200	132	240	76	87		WBGene00003689	64	102	12	240	76	87			WBGene00019240	865.344	1234.92	3106.69	1832.34	2637.14	2500.72		WBGene00019563	28.4427	21.6049	116.637	42.1336	64.2092	67.6037		WBGene00044777
WBGene00003645	155	117	178	358	221	246		WBGene00003645	167	290	209	358	221	246		WBGene00003645	162	187	207	358	221	246		WBGene00003645	253	138	71	358	221	246			WBGene00021747	20.9841	40.7602	162.088	80.919	52.7608	47.9342		WBGene00019556	53.4723	48.6109	104.856	100.472	112.629	86.919		WBGene00044776
WBGene00003720	283	177	68	356	169	216		WBGene00003720	290	251	501	356	169	216		WBGene00003720	213	406	101	356	169	216		WBGene00003720	176	191	21	356	169	216			WBGene00021748	115.912	156.431	899.588	670.668	499.886	588.777		WBGene00020155	341.313	445.986	1211.14	1151.38	1619.97	2170.83		WBGene00020157
WBGene00166752	0	0	0	0	0	0		WBGene00166752	0	0	0	0	0	0		WBGene00166752	0	0	0	0	0	0		WBGene00166752	0	0	0	0	0	0			WBGene00021750	95.9273	56.183	232.326	163.895	80.4825	66.927		WBGene00020156	51.1969	42.4381	56.5513	55.908	125.261	153.45		WBGene00003550
WBGene00020153	30	54	39	120	44	49		WBGene00020153	48	87	77	120	44	49		WBGene00020153	39	48	56	120	44	49		WBGene00020153	50	29	1	120	44	49			WBGene00005024	797.396	768.935	2211.15	1267.27	1014.08	983.104		WBGene00044777	161.555	122.685	110.746	181.499	230.522	165.253		WBGene00001480
WBGene00020152	28	37	42	83	41	29		WBGene00020152	32	53	77	83	41	29		WBGene00020152	36	44	37	83	41	29		WBGene00020152	54	28	8	83	41	29			WBGene00006770	121.908	182.87	1869.41	881.194	1055.22	1026.52		WBGene00044776	217.302	139.66	150.804	68.0619	65.2618	71.896		WBGene00019241
WBGene00003696	130	122	52	133	72	102		WBGene00003696	198	144	185	133	72	102		WBGene00003696	134	207	65	133	72	102		WBGene00003696	77	161	24	133	72	102			WBGene00021749	64.9508	110.163	2266.53	700.841	907.664	795.889		WBGene00020157	25.0296	21.6049	23.5631	28.3591	21.0522	30.0461		WBGene00019240
WBGene00006233	3	0	0	6	0	4		WBGene00006233	2	0	2	6	0	4		WBGene00006233	0	2	1	6	0	4		WBGene00006233	6	2	0	6	0	4			WBGene00019971	331.749	322.777	5070.65	1290.59	1618.59	1506.76		WBGene00003550	14.7902	18.5185	82.4707	43.7541	44.2096	74.0421		WBGene00021747
WBGene00003721	79	51	126	288	170	196		WBGene00003721	127	239	213	288	170	196		WBGene00003721	59	91	90	288	170	196		WBGene00003721	195	74	39	288	170	196			WBGene00019972	60.9538	118.976	174.245	295.56	335.344	247.811		WBGene00001480	204.788	177.469	735.167	588.25	337.888	568.729		WBGene00021748
WBGene00020151	5	3	3	0	4	4		WBGene00020151	4	5	13	0	4	4		WBGene00020151	11	5	2	0	4	4		WBGene00020151	13	1	0	0	4	4			WBGene00019973	48.9629	113.468	17.5595	33.602	30.4045	90.4419		WBGene00019241	2216.26	2160.49	1731.88	1670.76	1726.28	1838.18		WBGene00021750
WBGene00006282	2	0	0	0	0	0		WBGene00006282	2	0	3	0	0	0		WBGene00006282	0	2	0	0	0	0		WBGene00006282	3	6	0	0	0	0			WBGene00019975	116.911	64.996	31.0669	54.8603	56.3378	66.0226		WBGene00019240	1609.86	2111.1	2291.51	2165.02	3104.15	2967.05		WBGene00005024
WBGene00020154	4	1	1	1	1	2		WBGene00020154	0	1	1	1	1	2		WBGene00020154	1	3	0	1	1	2		WBGene00020154	3	2	1	1	1	2			WBGene00015344	472.642	967.228	4403.39	1308.42	3516.19	4324.93		WBGene00021747	86.4659	60.9566	3.53446	95.6108	62.104	56.8729		WBGene00006770
WBGene00004144	327	135	108	188	67	65		WBGene00004144	491	242	53	188	67	65		WBGene00004144	138	118	46	188	67	65		WBGene00004144	148	431	72	188	67	65			WBGene00044515	18.9856	23.1342	10.8059	0	7.154	5.42652		WBGene00021748	201.375	327.931	433.56	792.435	588.409	698.571		WBGene00021749
WBGene00020014	152	227	4	12	45	78		WBGene00020014	15	73	204	12	45	78		WBGene00020014	285	336	0	12	45	78		WBGene00020014	148	70	2	12	45	78			WBGene00019624	83.9364	218.122	379.556	259.901	547.281	607.77		WBGene00021750	151.315	141.203	57.7295	193.652	94.7349	79.4075		WBGene00019971
WBGene00005851	0	0	0	0	0	0		WBGene00005851	1	0	1	0	0	0		WBGene00005851	0	0	0	0	0	0		WBGene00005851	0	0	0	0	0	0			WBGene00019626	282.786	349.216	82.3947	205.726	252.179	195.355		WBGene00005024	1358.42	1224.53	1067.41	1497.36	1193.66	1166.43		WBGene00019972
WBGene00005260	0	5	0	0	0	0		WBGene00005260	0	1	0	0	0	0		WBGene00005260	0	0	0	0	0	0		WBGene00005260	0	0	0	0	0	0			WBGene00019623	57.9561	67.1992	9.45513	19.8869	23.2505	35.2724		WBGene00006770	229.817	442.128	643.271	1041.19	1242.08	1217.94		WBGene00019973
WBGene00005852	0	0	0	0	4	1		WBGene00005852	0	0	0	0	4	1		WBGene00005852	0	0	0	0	4	1		WBGene00005852	0	0	0	0	4	1			WBGene00268190	13.9894	19.8293	0	9.60056	13.4138	2.71326		WBGene00021749	172.932	432.869	335.774	828.087	1068.4	944.305		WBGene00019975
WBGene00005853	0	2	0	2	0	0		WBGene00005853	0	1	0	2	0	0		WBGene00005853	0	2	0	2	0	0		WBGene00005853	0	3	0	2	0	0			WBGene00021745	53.9591	35.2521	39.1713	14.4008	15.2023	10.853		WBGene00019971	575.681	1016.97	915.425	1524.91	1905.22	1787.74		WBGene00015344
WBGene00020015	83	76	33	50	44	28		WBGene00020015	49	80	72	50	44	28		WBGene00020015	41	85	4	50	44	28		WBGene00020015	80	51	8	50	44	28			WBGene00021743	407.691	274.305	534.89	331.905	210.149	217.061		WBGene00019972	91.0167	175.154	169.654	349.223	394.729	294.022		WBGene00019624
WBGene00005854	0	2	0	0	0	0		WBGene00005854	0	0	0	0	0	0		WBGene00005854	0	0	0	0	0	0		WBGene00005854	0	0	0	0	0	0			WBGene00021741	7.99394	4.40651	36.4698	17.8296	5.3655	4.5221		WBGene00019973	83.0528	57.8702	252.125	39.7028	35.7887	107.307		WBGene00019626
WBGene00020016	27	12	2	304	77	80		WBGene00020016	14	23	322	304	77	80		WBGene00020016	9	125	25	304	77	80		WBGene00020016	0	3	1	304	77	80			WBGene00021740	56.9568	81.5204	99.9543	200.926	189.581	213.443		WBGene00019975	56.8855	86.4194	96.6085	64.8209	66.3144	78.3344		WBGene00019623
WBGene00255729	0	0	0	0	0	0		WBGene00255729	0	0	0	0	0	0		WBGene00255729	0	0	0	0	0	0		WBGene00255729	0	0	0	0	0	0			WBGene00021072	12.9902	2.20325	8.1044	35.6592	12.5195	94.964		WBGene00015344	777.055	1162.8	2855.84	1545.98	4138.86	5131.44		WBGene00268190
WBGene00006119	0	0	0	0	0	0		WBGene00006119	0	0	0	0	0	0		WBGene00006119	0	0	0	0	0	0		WBGene00006119	0	0	0	0	0	0			WBGene00000785	1037.21	2019.28	6914.4	8702.91	11605.6	13341.1		WBGene00019624	91.0167	220.678	454.767	307.089	644.197	721.106		WBGene00021745
WBGene00005855	0	0	0	1	0	2		WBGene00005855	0	3	0	1	0	2		WBGene00005855	0	5	1	1	0	2		WBGene00005855	0	3	0	1	0	2			WBGene00021070	227.827	176.26	243.132	154.295	177.956	236.053		WBGene00019626	317.421	249.228	240.343	243.078	296.836	231.784		WBGene00021743
WBGene00005600	0	1	0	0	2	0		WBGene00005600	0	0	1	0	2	0		WBGene00005600	0	0	2	0	2	0		WBGene00005600	0	3	0	0	2	0			WBGene00020663	13.9894	19.8293	1.35073	8.9148	17.885	44.3165		WBGene00019623	71.6757	32.4073	70.6892	23.4976	27.3679	41.8499		WBGene00021741
WBGene00020013	0	0	0	0	0	0		WBGene00020013	0	1	0	0	0	0		WBGene00020013	2	2	0	0	0	0		WBGene00020013	1	3	0	0	0	0			WBGene00219734	46.9644	78.2155	63.4845	53.4888	52.7608	102.199		WBGene00021745	60.2986	49.3825	8.24707	17.0155	17.8944	12.8769		WBGene00021740
WBGene00003648	200	203	42	247	132	289		WBGene00003648	243	192	640	247	132	289		WBGene00003648	234	364	92	247	132	289		WBGene00003648	185	153	20	247	132	289			WBGene00000552	637.517	1514.74	8994.53	5009.43	8301.33	8369.5		WBGene00021743	1033.04	624.998	217.958	392.166	247.363	257.538		WBGene00021072
WBGene00003722	141	93	47	118	61	88		WBGene00003722	97	127	168	118	61	88		WBGene00003722	101	142	44	118	61	88		WBGene00003722	91	77	14	118	61	88			WBGene00004230	86.9341	361.334	147.23	93.9483	532.079	1002.1		WBGene00021741	10.2394	10.0308	14.1378	21.0668	6.31566	5.36537		WBGene00000785
WBGene00015759	501	737	1372	2702	2590	2205		WBGene00015759	1616	2561	956	2702	2590	2205		WBGene00015759	591	690	1463	2702	2590	2205		WBGene00015759	2534	1136	683	2702	2590	2205			WBGene00020662	1947.52	4069.41	20533.8	13362.6	23214.7	23216.4		WBGene00021740	81.9151	85.6478	148.447	237.407	223.153	253.246		WBGene00021070
WBGene00015758	15	0	1	0	29	69		WBGene00015758	5	2	82	0	29	69		WBGene00015758	0	6	0	0	29	69		WBGene00015758	12	7	0	0	29	69			WBGene00017764	12.9902	11.0163	21.6117	10.2863	18.7793	20.8016		WBGene00021072	14.7902	6.17282	189.683	42.1336	14.7365	112.673		WBGene00020663
WBGene00015757	0	0	0	0	11	32		WBGene00015757	0	0	41	0	11	32		WBGene00015757	0	0	0	0	11	32		WBGene00015757	1	0	0	0	11	32			WBGene00021738	98.925	143.211	726.695	339.448	391.682	343.679		WBGene00000785	2006.92	3531.62	6363.2	10283	13660.8	15828.9		WBGene00219734
WBGene00015760	0	0	0	3	27	37		WBGene00015760	2	0	86	3	27	37		WBGene00015760	0	0	0	3	27	37		WBGene00015760	0	0	0	3	27	37			WBGene00021736	146.889	131.094	722.642	394.309	353.229	325.591		WBGene00021070	193.411	216.82	305.142	182.309	209.469	280.072		WBGene00000552
WBGene00015761	1	0	0	0	14	6		WBGene00015761	0	4	24	0	14	6		WBGene00015761	0	0	0	0	14	6		WBGene00015761	0	0	0	0	14	6			WBGene00195169	53.9591	45.1667	27.0147	50.0601	76.9055	55.1696		WBGene00020663	5.68855	19.2901	34.1664	10.5334	21.0522	52.5806		WBGene00004230
WBGene00015762	0	0	0	4	12	31		WBGene00015762	0	0	74	4	12	31		WBGene00015762	3	1	0	4	12	31		WBGene00015762	0	5	0	4	12	31			WBGene00021739	298.774	215.919	68.8874	107.663	101.945	72.3535		WBGene00219734	80.7774	75.617	101.321	63.2004	62.104	121.257		WBGene00020662
WBGene00005899	5	1	0	2	4	0		WBGene00005899	3	2	0	2	4	0		WBGene00005899	5	6	3	2	4	0		WBGene00005899	3	1	1	2	4	0			WBGene00021735	149.886	259.984	1144.07	525.973	531.185	507.379		WBGene00000552	1303.81	2633.48	4423.96	5918.96	9771.38	9930.23		WBGene00017764
WBGene00005898	0	1	1	0	1	3		WBGene00005898	3	1	0	0	1	3		WBGene00005898	1	2	2	0	1	3		WBGene00005898	1	0	0	0	1	3			WBGene00235315	86.9341	104.655	8.1044	33.602	50.9723	53.3607		WBGene00020664	3.41313	10.0308	8.24707	8.91287	10.5261	18.2423		WBGene00021738
WBGene00015756	100	166	451	1038	622	696		WBGene00015756	199	389	290	1038	622	696		WBGene00015756	103	89	495	1038	622	696		WBGene00015756	372	150	127	1038	622	696			WBGene00016539	106.919	217.02	309.318	288.017	431.923	520.041		WBGene00004230	22.7542	93.3639	1191.11	111.006	626.303	1188.97		WBGene00021736
WBGene00005585	6	1	0	1	0	0		WBGene00005585	1	2	0	1	0	0		WBGene00005585	5	0	0	1	0	0		WBGene00005585	4	1	0	1	0	0			WBGene00016538	19.9849	42.9634	9.45513	26.7444	25.9333	37.9856		WBGene00020662	4820.47	8158.92	13369.7	15788.7	27325.8	27545.8		WBGene00195169
WBGene00005584	1	1	1	0	1	0		WBGene00005584	0	5	0	0	1	0		WBGene00005584	1	0	0	0	1	0		WBGene00005584	0	6	0	0	1	0			WBGene00004266	1295.02	2365.19	6032.38	4362.08	5816.2	6027.95		WBGene00017764	26.1673	26.2345	4.71261	12.1539	22.1048	24.6807		WBGene00021739
WBGene00015763	4	7	0	5	11	5		WBGene00015763	3	17	6	5	11	5		WBGene00015763	12	7	4	5	11	5		WBGene00015763	12	2	2	5	11	5			WBGene00016540	84.9356	67.1992	148.581	144.008	128.772	213.443		WBGene00021738	194.548	210.647	334.595	401.079	461.043	407.768		WBGene00021735
WBGene00015764	0	0	0	1	0	0		WBGene00015764	0	1	0	1	0	0		WBGene00015764	0	0	1	1	0	0		WBGene00015764	0	0	0	1	0	0			WBGene00022288	115.912	111.264	41.8727	77.4902	72.4343	43.4121		WBGene00021736	398.198	366.511	254.481	465.9	415.781	386.307		WBGene00235315
WBGene00019453	0	0	0	2	1	0		WBGene00019453	0	0	0	2	1	0		WBGene00019453	0	0	2	2	1	0		WBGene00019453	0	0	0	2	1	0			WBGene00022289	17.9864	22.0325	6.75367	24.0014	39.347	29.8458		WBGene00195169	52.3346	60.9566	53.0169	59.1491	90.5245	65.4575		WBGene00255579
WBGene00019452	0	0	0	0	5	4		WBGene00019452	0	0	24	0	5	4		WBGene00019452	0	0	0	0	5	4		WBGene00019452	0	0	0	0	5	4			WBGene00004053	223.83	269.899	2991.87	995.715	1495.19	1673.18		WBGene00021739	426.641	200.617	242.699	127.211	119.998	85.8459		WBGene00016539
WBGene00019451	0	0	0	0	1	13		WBGene00019451	1	0	27	0	1	13		WBGene00019451	0	0	0	0	1	13		WBGene00019451	0	0	0	0	1	13			WBGene00001171	46.9644	105.756	104.006	102.177	138.609	200.781		WBGene00021735	344.726	374.999	358.158	621.47	625.25	601.995		WBGene00016538
WBGene00199860	0	0	0	0	0	0		WBGene00199860	0	0	0	0	0	0		WBGene00199860	0	0	0	0	0	0		WBGene00199860	0	0	0	0	0	0			WBGene00017502	10.9917	9.91464	6.75367	15.7723	8.9425	12.6619		WBGene00235315	104.669	66.3578	103.677	39.7028	59.9988	63.3114		WBGene00004266
WBGene00019454	0	0	0	0	4	4		WBGene00019454	0	0	4	0	4	4		WBGene00019454	0	0	0	0	4	4		WBGene00019454	0	0	0	0	4	4			WBGene00044774	179.864	210.411	41.8727	108.349	82.271	69.6403		WBGene00255579	19.3411	10.0308	36.5227	3.24104	2.10522	4.2923		WBGene00016540
WBGene00019450	0	0	0	11	102	149		WBGene00019450	3	0	461	11	102	149		WBGene00019450	0	0	0	11	102	149		WBGene00019450	0	16	0	11	102	149			WBGene00022285	28.978	48.4716	12.1566	48.0028	33.9815	23.5149		WBGene00016539	104.669	126.543	876.546	340.31	508.411	617.018		WBGene00022288
WBGene00165423	0	0	0	0	0	0		WBGene00165423	0	0	0	0	0	0		WBGene00165423	0	0	0	0	0	0		WBGene00165423	0	0	0	0	0	0			WBGene00022284	84.9356	113.468	45.9249	122.75	106.416	117.575		WBGene00016538	29.5804	45.5245	62.4421	31.6002	30.5257	45.0691		WBGene00022289
WBGene00019449	0	0	0	10	60	85		WBGene00019449	0	0	199	10	60	85		WBGene00019449	0	0	0	10	60	85		WBGene00019449	0	4	0	10	60	85			WBGene00004923	68.9477	69.4025	47.2757	86.405	54.5493	61.5005		WBGene00004266	2311.83	3408.17	5797.69	5154.07	6846.18	7152.04		WBGene00004053
WBGene00022758	0	0	0	1	6	14		WBGene00022758	0	0	21	1	6	14		WBGene00022758	0	0	0	1	6	14		WBGene00022758	0	0	0	1	6	14			WBGene00022286	391.703	473.699	4930.18	2354.88	3049.39	2923.08		WBGene00016540	98.9807	94.9071	172.01	170.155	151.576	253.246		WBGene00001171
WBGene00022757	0	0	0	0	6	6		WBGene00022757	1	0	24	0	6	6		WBGene00022757	0	0	0	0	6	6		WBGene00022757	0	0	0	0	6	6			WBGene00022287	29.9773	305.151	58.0815	109.035	749.382	1410.89		WBGene00022288	124.01	64.043	83.6489	91.5595	85.2614	51.5076		WBGene00017502
WBGene00022756	0	1	1	1	0	0		WBGene00022756	0	0	0	1	0	0		WBGene00022756	0	4	0	1	0	0		WBGene00022756	1	0	0	1	0	0			WBGene00004925	119.909	103.553	333.631	165.953	193.158	211.634		WBGene00022289	6.82625	18.5185	29.4538	28.3591	46.3148	35.4114		WBGene00044774
WBGene00004177	16	14	6	2	0	9		WBGene00004177	27	17	8	2	0	9		WBGene00004177	7	24	10	2	0	9		WBGene00004177	11	20	6	2	0	9			WBGene00020017	49.9621	245.663	82.3947	88.4623	677.842	685.55		WBGene00004053	341.313	551.696	1172.26	1176.5	1759.96	1985.19		WBGene00022285
WBGene00005857	0	0	0	0	0	0		WBGene00005857	0	0	0	0	0	0		WBGene00005857	0	0	0	0	0	0		WBGene00005857	0	0	0	0	0	0			WBGene00001578	281.786	412.008	617.285	625.408	650.12	967.729		WBGene00001171	27.305	84.8762	248.59	120.729	163.155	238.222		WBGene00022284
WBGene00005856	0	0	0	0	0	0		WBGene00005856	0	0	0	0	0	0		WBGene00005856	0	0	0	0	0	0		WBGene00005856	0	0	0	0	0	0			WBGene00019979	194.852	224.732	285.005	161.152	219.091	283.083		WBGene00017502	31.8559	4.62961	16.4941	18.636	10.5261	15.023		WBGene00004923
WBGene00023402	0	0	0	0	0	0		WBGene00023402	0	0	0	0	0	0		WBGene00023402	0	0	0	0	0	0		WBGene00023402	0	0	0	0	0	0			WBGene00000558	325.753	488.021	55.3801	207.784	363.066	529.99		WBGene00044774	255.985	128.086	266.263	128.021	96.8401	82.6267		WBGene00022286
WBGene00004176	30	8	0	5	7	7		WBGene00004176	46	18	9	5	7	7		WBGene00004176	8	32	6	5	7	7		WBGene00004176	11	13	1	5	7	7			WBGene00000557	146.889	250.069	12.1566	10.2863	47.3953	151.038		WBGene00022285	43.2329	44.7529	41.2353	56.7183	39.9992	27.8999		WBGene00022287
WBGene00003680	183	119	66	264	92	148		WBGene00003680	201	245	281	264	92	148		WBGene00003680	130	208	70	264	92	148		WBGene00003680	111	124	20	264	92	148			WBGene00000556	154.883	127.789	22.9625	7.5433	9.83675	18.0884		WBGene00022284	62.574	84.1046	167.298	145.037	125.261	139.5		WBGene00004925
WBGene00022755	2	7	0	1	6	3		WBGene00022755	3	0	1	1	6	3		WBGene00022755	5	4	2	1	6	3		WBGene00022755	3	0	0	1	6	3			WBGene00019980	146.889	164.142	22.9625	76.8045	67.0688	62.4049		WBGene00004923	97.843	92.5923	142.556	102.093	64.2092	72.969		WBGene00020017
WBGene00018624	13	19	3	0	2	1		WBGene00018624	37	16	11	0	2	1		WBGene00018624	5	11	2	0	2	1		WBGene00018624	17	15	5	0	2	1			WBGene00019978	1376.96	705.041	2785.21	1930.4	1839.47	2488.96		WBGene00022286	789.57	1158.17	1261.8	2782.44	3589.4	3468.18		WBGene00001578
WBGene00018615	180	189	36	65	55	56		WBGene00018615	157	171	159	65	55	56		WBGene00018615	127	142	44	65	55	56		WBGene00018615	122	190	39	65	55	56			WBGene00019977	32.975	23.1342	164.789	81.6047	47.3953	66.0226		WBGene00022287	14.7902	60.185	715.139	128.832	882.087	1674		WBGene00019979
WBGene00018616	126	318	231	758	1224	1091		WBGene00018616	78	502	438	758	1224	1091		WBGene00018616	304	299	78	758	1224	1091		WBGene00018616	453	131	16	758	1224	1091			WBGene00004139	55.9576	254.476	251.236	299.675	1544.37	1139.57		WBGene00004925	150.178	184.413	136.666	196.083	227.364	251.099		WBGene00000558
WBGene00018617	0	0	0	0	0	0		WBGene00018617	0	1	1	0	0	0		WBGene00018617	1	2	0	0	0	0		WBGene00018617	0	1	0	0	0	0			WBGene00018757	198.849	211.512	275.55	366.193	241.448	265.899		WBGene00020017	6.82625	65.5862	401.75	104.524	797.879	813.39		WBGene00000557
WBGene00018618	2	10	0	0	0	2		WBGene00018618	3	5	21	0	0	2		WBGene00018618	7	36	0	0	0	2		WBGene00018618	0	0	1	0	0	2			WBGene00006794	1077.18	2562.38	14500.1	6850	10644.3	10487.6		WBGene00001578	539.274	463.733	1167.55	738.958	765.248	1148.19		WBGene00000556
WBGene00018619	59	165	28	167	168	135		WBGene00018619	45	153	238	167	168	135		WBGene00018619	210	273	22	167	168	135		WBGene00018619	90	49	2	167	168	135			WBGene00016513	110.916	78.2155	101.305	202.983	72.4343	99.4861		WBGene00019979	178.62	208.333	412.353	190.411	257.889	335.872		WBGene00019980
WBGene00018620	1	0	0	5	0	1		WBGene00018620	1	2	0	5	0	1		WBGene00018620	0	1	1	5	0	1		WBGene00018620	0	2	0	5	0	1			WBGene00045390	61.9531	68.3009	21.6117	24.0014	41.1355	25.3237		WBGene00000558	77.3642	97.9935	177.901	245.509	427.36	628.821		WBGene00019978
WBGene00255730	1	1	1	0	1	3		WBGene00255730	4	0	1	0	1	3		WBGene00255730	2	3	1	0	1	3		WBGene00255730	1	0	0	0	1	3			WBGene00016512	187.858	164.142	272.848	497.172	446.231	340.062		WBGene00000557	26.1673	40.8949	342.842	12.1539	55.7883	179.203		WBGene00019977
WBGene00003673	83	48	19	46	28	32		WBGene00003673	45	53	101	46	28	32		WBGene00003673	81	96	21	46	28	32		WBGene00003673	45	58	7	46	28	32			WBGene00016516	11.9909	25.3374	8.1044	87.7765	148.446	94.0596		WBGene00000556	9.10167	6.94442	15.316	8.91287	11.5787	21.4615		WBGene00004139
WBGene00018621	12	1	13	156	65	38		WBGene00018621	9	21	24	156	65	38		WBGene00018621	12	3	20	156	65	38		WBGene00018621	20	7	2	156	65	38			WBGene00019348	30.9765	58.3862	8.1044	8.9148	21.462	19.8972		WBGene00019980	145.627	106.481	122.528	90.7493	78.9458	74.0421		WBGene00018757
WBGene00018614	16	7	6	14	3	6		WBGene00018614	43	15	57	14	3	6		WBGene00018614	4	48	8	14	3	6		WBGene00018614	5	12	2	14	3	6			WBGene00018707	3.99697	23.1342	10.8059	20.5726	17.885	40.6989		WBGene00019978	2739.6	2283.17	3779.51	2280.89	2165.22	2953.1		WBGene00006794
WBGene00005621	0	0	0	0	0	1		WBGene00005621	2	1	0	0	0	1		WBGene00005621	0	0	1	0	0	1		WBGene00005621	3	0	0	0	0	1			WBGene00018708	19.9849	60.5895	29.7161	12.3436	85.848	87.7287		WBGene00019977	75.0888	77.1602	43.5917	96.4211	55.7883	78.3344		WBGene00016513
WBGene00018622	37	42	18	76	59	45		WBGene00018622	43	55	70	76	59	45		WBGene00018622	43	59	32	76	59	45		WBGene00018622	44	14	2	76	59	45			WBGene00018706	110.916	254.476	40.522	107.663	286.16	414.224		WBGene00004139	14.7902	100.308	365.227	354.084	1817.86	1352.07		WBGene00045390
WBGene00018623	4	1	1	11	1	0		WBGene00018623	3	1	1	11	1	0		WBGene00018623	0	1	0	11	1	0		WBGene00018623	0	1	1	11	1	0			WBGene00000387	27.9788	22.0325	679.419	169.381	168.119	142.898		WBGene00018757	274.188	255.4	465.37	432.679	284.205	315.484		WBGene00016512
WBGene00197369	0	0	0	0	0	0		WBGene00197369	0	0	0	0	0	0		WBGene00197369	0	0	0	0	0	0		WBGene00197369	0	0	0	0	0	0			WBGene00017508	25.9803	29.7439	2.70147	14.4008	8.9425	21.7061		WBGene00006794	2360.75	4111.1	5928.47	8093.7	12529.2	12443.4		WBGene00016516
WBGene00017959	47	92	16	30	27	17		WBGene00017959	30	46	40	30	27	17		WBGene00017959	39	39	9	30	27	17		WBGene00017959	123	30	11	30	27	17			WBGene00017507	23.9818	41.8618	6.75367	55.5461	44.7125	56.9784		WBGene00016513	129.699	97.2219	260.372	239.837	85.2614	118.038		WBGene00019348
WBGene00005593	0	0	0	0	0	1		WBGene00005593	0	0	0	0	0	1		WBGene00005593	0	0	0	0	0	1		WBGene00005593	2	0	0	0	0	1			WBGene00017506	2318.24	1659.05	3505.15	3459.63	2775.75	1789.85		WBGene00045390	50.0592	33.1789	40.0572	28.3591	48.4201	30.0461		WBGene00018707
WBGene00005594	0	0	1	0	0	1		WBGene00005594	1	0	0	0	0	1		WBGene00005594	0	5	0	0	0	1		WBGene00005594	0	0	0	0	0	1			WBGene00017504	165.874	190.581	49.9771	43.2025	50.9723	44.3165		WBGene00016512	278.739	416.665	219.136	587.439	525.252	403.476		WBGene00018708
WBGene00005451	0	0	1	1	0	0		WBGene00005451	3	0	1	1	0	0		WBGene00005451	0	0	0	1	0	0		WBGene00005451	0	0	0	1	0	0			WBGene00017510	32.975	29.7439	1.35073	15.0866	7.154	29.8458		WBGene00016516	18.2033	36.2653	56.5513	103.713	174.733	111.6		WBGene00018706
WBGene00005452	10	2	0	0	0	1		WBGene00005452	3	7	0	0	0	1		WBGene00005452	3	4	0	0	0	1		WBGene00005452	6	0	0	0	0	1			WBGene00017503	147.888	135.5	24.3132	82.2905	100.156	81.3977		WBGene00019348	5.68855	13.8888	62.4421	10.5334	25.2626	23.6076		WBGene00000387
WBGene00017963	34	97	1	2	22	13		WBGene00017963	8	25	29	2	22	13		WBGene00017963	34	58	1	2	22	13		WBGene00017963	14	14	0	2	22	13			WBGene00017512	46.9644	27.5407	14.8581	40.4595	30.4045	30.7503		WBGene00018707	12.5148	28.5493	57.7295	24.3078	21.0522	48.2883		WBGene00017508
WBGene00005320	0	3	1	0	0	0		WBGene00005320	2	8	1	0	0	0		WBGene00005320	1	5	0	0	0	0		WBGene00005320	3	1	0	0	0	0			WBGene00003707	167.873	115.671	36.4698	172.81	89.425	74.1624		WBGene00018708	18.2033	53.2406	18.8504	14.5847	101.051	104.088		WBGene00017507
WBGene00017960	3	0	0	1	2	8		WBGene00017960	1	1	7	1	2	8		WBGene00017960	4	4	0	1	2	8		WBGene00017960	1	0	0	1	2	8			WBGene00003700	215.836	182.87	51.3279	150.18	67.963	63.3094		WBGene00018706	30.7181	103.395	406.463	127.211	336.835	491.468		WBGene00017506
WBGene00005472	0	0	0	0	0	0		WBGene00005472	0	0	1	0	0	0		WBGene00005472	0	0	0	0	0	0		WBGene00005472	0	0	0	0	0	0			WBGene00021610	43.9667	17.626	22.9625	10.2863	9.83675	6.33094		WBGene00000387	58.0232	96.4503	80.1144	200.135	197.891	169.546		WBGene00017504
WBGene00017961	52	20	38	139	67	80		WBGene00017961	52	37	64	139	67	80		WBGene00017961	42	70	52	139	67	80		WBGene00017961	73	24	10	139	67	80			WBGene00021611	122.907	138.805	18.9103	25.3729	25.9333	30.7503		WBGene00017508	32.9936	22.3765	24.7412	17.0155	10.5261	25.7538		WBGene00017510
WBGene00005687	0	0	0	0	2	0		WBGene00005687	5	1	0	0	2	0		WBGene00005687	0	0	0	0	2	0		WBGene00005687	0	0	0	0	2	0			WBGene00021608	13.9894	35.2521	14.8581	85.0335	125.195	94.0596		WBGene00017507	40.9575	31.6357	61.2639	65.6312	52.6305	67.6037		WBGene00017503
WBGene00005688	2	0	1	0	0	0		WBGene00005688	6	0	0	0	0	0		WBGene00005688	3	3	2	0	0	0		WBGene00005688	0	3	2	0	0	0			WBGene00019391	20.9841	29.7439	4.0522	6.85754	6.25975	9.04419		WBGene00017506	1781.65	3735.33	1358.41	4087.77	3267.3	2123.61		WBGene00017512
WBGene00017962	279	278	228	38	106	136		WBGene00017962	399	352	61	38	106	136		WBGene00017962	205	185	47	38	106	136		WBGene00017962	225	459	118	38	106	136			WBGene00019384	9.99243	7.71139	1.35073	13.7151	37.5585	23.5149		WBGene00017504	227.542	98.7651	129.597	51.0465	59.9988	52.5806		WBGene00003707
WBGene00005912	0	1	0	0	0	1		WBGene00005912	0	3	0	0	0	1		WBGene00005912	3	2	1	0	0	1		WBGene00005912	0	0	0	0	0	1			WBGene00019388	301.771	93.6383	95.9021	101.492	63.4918	25.3237		WBGene00017510	28.4427	20.8333	34.1664	17.8257	8.42088	35.4114		WBGene00003700
WBGene00005913	0	0	0	0	0	0		WBGene00005913	0	0	0	0	0	0		WBGene00005913	0	0	0	0	0	0		WBGene00005913	1	0	0	0	0	0			WBGene00021607	2.99773	3.30488	33.7683	25.3729	5.3655	3.61768		WBGene00017503	124.01	140.432	137.844	97.2313	117.892	96.5767		WBGene00021610
WBGene00005914	0	1	0	1	0	0		WBGene00005914	0	0	0	1	0	0		WBGene00005914	0	0	0	1	0	0		WBGene00005914	3	0	0	1	0	0			WBGene00021606	68.9477	63.8943	45.9249	86.405	59.0205	78.6845		WBGene00017512	58.0232	32.4073	15.316	47.8054	35.7887	36.4845		WBGene00021611
WBGene00017957	265	303	82	291	189	206		WBGene00017957	285	533	429	291	189	206		WBGene00017957	250	286	140	291	189	206		WBGene00017957	417	447	42	291	189	206			WBGene00001769	67.9485	50.6748	33.7683	14.4008	13.4138	20.8016		WBGene00003707	226.404	138.117	275.688	204.186	105.261	87.9921		WBGene00021608
WBGene00019244	26	58	362	306	300	258		WBGene00019244	72	207	103	306	300	258		WBGene00019244	45	43	337	306	300	258		WBGene00019244	239	61	135	306	300	258			WBGene00022805	93.9288	131.094	171.543	152.923	152.917	127.523		WBGene00003700	359.516	191.357	219.136	177.447	79.9984	75.1152		WBGene00019391
WBGene00005895	0	1	3	1	1	0		WBGene00005895	2	4	0	1	1	0		WBGene00005895	3	3	0	1	1	0		WBGene00005895	2	1	0	1	1	0			WBGene00021603	38.9705	22.0325	136.424	91.2053	119.83	82.3022		WBGene00021610	43.2329	41.6665	21.2068	12.1539	11.5787	7.51152		WBGene00019384
WBGene00005632	0	0	0	0	0	0		WBGene00005632	0	0	0	0	0	0		WBGene00005632	0	0	1	0	0	0		WBGene00005632	0	0	0	0	0	0			WBGene00021602	23.9818	31.9472	125.618	99.4344	101.05	101.295		WBGene00021611	186.584	74.8454	71.8673	29.9797	30.5257	36.4845		WBGene00019388
WBGene00005631	3	1	0	6	1	2		WBGene00005631	2	3	1	6	1	2		WBGene00005631	0	8	1	6	1	2		WBGene00005631	0	4	0	6	1	2			WBGene00000976	310.764	427.431	2565.04	1256.3	1619.49	1566.45		WBGene00021608	28.4427	40.8949	47.1261	100.472	147.365	111.6		WBGene00021607
WBGene00021709	414	413	192	234	212	285		WBGene00021709	556	536	291	234	212	285		WBGene00021709	383	383	137	234	212	285		WBGene00021709	202	489	84	234	212	285			WBGene00018115	15.9879	7.71139	17.5595	15.0866	16.0965	14.4707		WBGene00019391	14.7902	9.25923	30.632	8.10261	7.36827	10.7307		WBGene00021606
WBGene00005896	0	0	0	0	0	0		WBGene00005896	0	0	0	0	0	0		WBGene00005896	0	0	0	0	0	0		WBGene00005896	0	0	0	0	0	0			WBGene00018112	455.655	166.346	191.804	198.183	91.2135	47.0298		WBGene00019384	6.82625	8.48762	15.316	16.2052	44.2096	27.8999		WBGene00001769
WBGene00021708	4	1	0	0	0	0		WBGene00021708	1	3	0	0	0	0		WBGene00021708	0	4	1	0	0	0		WBGene00021708	1	1	0	0	0	0			WBGene00018113	36.972	133.297	16.2088	29.4874	202.995	249.62		WBGene00019388	286.703	180.555	50.6606	119.919	74.7353	30.0461		WBGene00022805
WBGene00021707	0	3	0	0	0	2		WBGene00021707	1	0	0	0	0	2		WBGene00021707	1	4	0	0	0	2		WBGene00021707	1	0	0	0	0	2			WBGene00018111	144.89	132.195	16.2088	38.4022	75.117	75.9712		WBGene00021607	10.2394	3.85801	1.17815	29.9797	6.31566	4.2923		WBGene00021603
WBGene00021706	0	1	1	0	1	1		WBGene00021706	0	0	3	0	1	1		WBGene00021706	2	5	0	0	1	1		WBGene00021706	0	0	0	0	1	1			WBGene00002016	149.886	142.11	22.9625	33.602	64.386	86.8243		WBGene00021606	187.722	125	109.568	102.093	69.4723	93.3575		WBGene00021602
WBGene00021710	6	4	0	2	0	6		WBGene00021710	1	2	3	2	0	6		WBGene00021710	6	6	0	2	0	6		WBGene00021710	6	4	0	2	0	6			WBGene00002018	100.924	103.553	10.8059	13.7151	56.3378	49.7431		WBGene00001769	54.61	34.7221	53.0169	17.0155	15.7892	24.6807		WBGene00000976
WBGene00019242	13	11	3	5	5	18		WBGene00019242	3	6	31	5	5	18		WBGene00019242	10	21	2	5	5	18		WBGene00019242	5	7	0	5	5	18			WBGene00021600	19.9849	14.3211	8.1044	14.4008	17.885	16.2795		WBGene00022805	92.1544	149.691	177.901	180.688	179.996	151.303		WBGene00018115
WBGene00019243	4	0	5	2	6	1		WBGene00019243	22	9	4	2	6	1		WBGene00019243	0	3	5	2	6	1		WBGene00019243	5	9	16	2	6	1			WBGene00001632	598.546	751.309	2415.11	1219.96	1564.94	1930.03		WBGene00021603	21.6165	62.4998	25.9194	107.765	141.05	97.6498		WBGene00018112
WBGene00001564	2453	3433	7238	49525	22864	39448		WBGene00001564	4547	5785	48532	49525	22864	39448		WBGene00001564	4328	10876	23726	49525	22864	39448		WBGene00001564	30476	5314	1858	49525	22864	39448			WBGene00044344	198.849	228.037	1140.02	772.845	812.874	756.999		WBGene00021602	55.7477	80.2466	77.7581	117.488	118.945	120.184		WBGene00018113
WBGene00219801	24	12	0	3	2	5		WBGene00219801	23	22	26	3	2	5		WBGene00219801	27	25	2	3	2	5		WBGene00219801	12	47	1	3	2	5			WBGene00021309	105.92	322.777	64.8352	67.8897	409.567	568.88		WBGene00000976	717.894	1146.6	799.966	1484.4	1906.28	1858.56		WBGene00018111
WBGene00005228	68	25	7	84	8	31		WBGene00005228	59	57	181	84	8	31		WBGene00005228	33	137	18	84	8	31		WBGene00005228	38	60	2	84	8	31			WBGene00020394	122.907	91.435	85.0962	88.4623	131.455	49.7431		WBGene00018115	10.2394	10.0308	27.0975	17.8257	18.947	17.1692		WBGene00002016
WBGene00005613	0	0	0	0	0	3		WBGene00005613	0	0	0	0	0	3		WBGene00005613	0	0	0	0	0	3		WBGene00005613	2	0	0	0	0	3			WBGene00020393	342.74	342.606	1234.57	1226.13	1172.36	1249.91		WBGene00018112	689.452	314.814	106.034	234.165	107.366	55.7999		WBGene00002018
WBGene00005612	0	0	0	4	0	1		WBGene00005612	0	0	5	4	0	1		WBGene00005612	0	0	1	4	0	1		WBGene00005612	0	0	0	4	0	1			WBGene00020388	57.9561	123.382	29.7161	154.295	203.889	153.751		WBGene00018113	9.10167	56.327	285.113	34.8412	238.943	296.168		WBGene00021600
WBGene00015489	0	0	0	0	0	0		WBGene00015489	0	0	0	0	0	0		WBGene00015489	0	2	0	0	0	0		WBGene00015489	0	1	0	0	0	0			WBGene00020396	35.9727	99.1464	24.3132	10.9721	86.7423	150.134		WBGene00018111	34.1313	65.5862	97.7867	45.3746	88.4193	90.1382		WBGene00001632
WBGene00006182	8	4	0	2	0	3		WBGene00006182	0	0	1	2	0	3		WBGene00006182	0	0	0	2	0	3		WBGene00006182	0	0	0	2	0	3			WBGene00020389	2252.29	1855.14	2100.39	1944.11	1820.69	1948.12		WBGene00002016	187.722	58.6418	4.71261	39.7028	75.7879	103.015		WBGene00044344
WBGene00006181	0	0	0	0	0	1		WBGene00006181	0	0	0	0	0	1		WBGene00006181	0	4	0	0	0	1		WBGene00006181	0	0	0	0	0	1			WBGene00020392	839.364	553.017	1820.79	1202.81	1234.96	966.824		WBGene00002018	159.279	31.6357	4.71261	16.2052	66.3144	59.0191		WBGene00021309
WBGene00005516	1	2	0	2	0	0		WBGene00005516	0	0	0	2	0	0		WBGene00005516	0	2	0	2	0	0		WBGene00005516	0	1	0	2	0	0			WBGene00020390	117.911	153.126	64.8352	71.3184	82.271	115.766		WBGene00021600	7.96396	12.3456	25.9194	17.0155	21.0522	19.3153		WBGene00020394
WBGene00006288	7	7	0	6	1	0		WBGene00006288	4	9	9	6	1	0		WBGene00006288	2	3	9	6	1	0		WBGene00006288	5	4	0	6	1	0			WBGene00020391	915.306	2080.97	10073.8	3806.62	6896.46	6493.73		WBGene00021601	14.7902	7.71602	24.7412	12.9642	3.15783	7.51152		WBGene00020393
WBGene00005642	89	61	148	267	157	168		WBGene00005642	100	129	269	267	157	168		WBGene00005642	117	181	363	267	157	168		WBGene00005642	200	96	76	267	157	168			WBGene00021305	341.741	665.383	4316.94	2538.66	3864.95	3148.28		WBGene00001632	988.669	1226.85	1617.6	1441.45	1842.07	2289.94		WBGene00020388
WBGene00006087	1	0	1	0	0	0		WBGene00006087	7	0	0	0	0	0		WBGene00006087	0	0	0	0	0	0		WBGene00006087	0	0	3	0	0	0			WBGene00021304	22.9826	25.3374	12.1566	15.7723	30.4045	48.8386		WBGene00044344	293.529	628.856	454.767	913.164	956.823	898.163		WBGene00020396
WBGene00206359	2	3	4	6	0	0		WBGene00206359	12	9	0	6	0	0		WBGene00206359	0	3	4	6	0	0		WBGene00206359	0	7	1	6	0	0			WBGene00005644	33.9743	84.8253	60.783	51.4316	58.1263	53.3607		WBGene00021309	40.9575	101.851	572.582	80.2159	482.095	674.964		WBGene00020389
WBGene00015491	0	2	0	2	0	0		WBGene00015491	2	0	0	2	0	0		WBGene00015491	0	0	2	2	0	0		WBGene00015491	0	6	0	2	0	0			WBGene00021302	47.9637	95.8415	29.7161	43.8883	81.3768	69.6403		WBGene00020394	141.076	322.53	47.1261	104.524	154.734	59.0191		WBGene00020392
WBGene00005643	485	59	524	429	133	61		WBGene00005643	631	758	94	429	133	61		WBGene00005643	105	114	459	429	133	61		WBGene00005643	163	435	198	429	133	61			WBGene00044517	50.9614	38.5569	27.0147	24.0014	19.6735	11.7575		WBGene00020393	775.918	866.509	749.305	1448.75	1379.97	1482.99		WBGene00020390
WBGene00006266	0	2	0	4	1	2		WBGene00006266	1	2	0	4	1	2		WBGene00006266	0	5	0	4	1	2		WBGene00006266	2	0	0	4	1	2			WBGene00021301	19.9849	26.439	10.8059	6.85754	9.83675	12.6619		WBGene00020388	48.9215	77.9318	193.217	182.309	239.995	182.423		WBGene00020391
WBGene00019983	651	851	3213	3264	4139	3739		WBGene00019983	1035	2169	1155	3264	4139	3739		WBGene00019983	1485	1101	3990	3264	4139	3739		WBGene00019983	4332	1908	1773	3264	4139	3739			WBGene00020277	5.99546	9.91464	2.70147	2.05726	20.5678	20.8016		WBGene00020396	5.68855	27.7777	292.182	12.9642	102.103	178.13		WBGene00021305
WBGene00019982	0	1	1	5	1	5		WBGene00019982	4	2	1	5	1	5		WBGene00019982	9	3	1	5	1	5		WBGene00019982	1	2	0	5	1	5			WBGene00020280	231.824	415.313	425.481	306.532	845.961	856.485		WBGene00020389	3148.04	2770.05	2070.01	2297.09	2143.11	2311.4		WBGene00021304
WBGene00044514	29	8	2	17	7	16		WBGene00044514	55	13	9	17	7	16		WBGene00044514	12	24	5	17	7	16		WBGene00044514	22	33	9	17	7	16			WBGene00020279	96.9265	95.8415	48.6264	55.5461	59.9148	68.7359		WBGene00020392	1191.18	1376.54	599.68	1421.2	1453.65	1147.12		WBGene00005644
WBGene00019981	1	0	0	0	0	0		WBGene00019981	0	1	1	0	0	0		WBGene00019981	3	0	0	0	0	0		WBGene00019981	1	0	0	0	0	0			WBGene00020343	85.9349	179.565	64.8352	145.38	104.627	191.737		WBGene00020390	152.453	131.944	120.172	84.2672	96.8401	137.353		WBGene00021302
WBGene00044091	1	1	1	0	2	2		WBGene00044091	0	1	0	0	2	2		WBGene00044091	1	0	0	0	2	2		WBGene00044091	4	1	0	0	2	2			WBGene00020342	8.99318	12.1179	8.1044	21.2584	29.5103	28.9414		WBGene00020391	2402.84	3040.11	3279.98	4497.76	8117.73	7704.67		WBGene00044517
WBGene00020060	8	8	0	7	1	1		WBGene00020060	3	4	1	7	1	1		WBGene00020060	1	6	0	7	1	1		WBGene00020060	5	2	0	7	1	1			WBGene00020341	81.9379	146.516	95.9021	79.5475	136.82	224.296		WBGene00021305	856.695	1278.54	1837.92	2999.59	4549.38	3735.37		WBGene00021301
WBGene00020059	0	3	0	0	2	4		WBGene00020059	2	0	1	0	2	4		WBGene00020059	0	0	0	0	2	4		WBGene00020059	1	2	0	0	2	4			WBGene00020340	462.649	669.789	1777.57	1352.31	1413.81	1498.62		WBGene00021304	19.3411	14.6604	64.7984	18.636	35.7887	57.946		WBGene00020277
WBGene00020062	16	12	7	1	3	8		WBGene00020062	3	5	24	1	3	8		WBGene00020062	8	3	0	1	3	8		WBGene00020062	15	7	0	1	3	8			WBGene00006589	77.9409	146.516	375.504	478.656	700.198	728.962		WBGene00005644	59.1609	40.8949	168.476	60.7696	68.4197	63.3114		WBGene00020280
WBGene00206411	5	0	0	2	0	0		WBGene00206411	1	0	0	2	0	0		WBGene00206411	2	0	0	2	0	0		WBGene00206411	1	0	0	2	0	0			WBGene00000111	83.9364	101.35	189.103	819.476	337.132	520.041		WBGene00021302	72.8134	65.5862	97.7867	51.8567	95.7875	82.6267		WBGene00020279
WBGene00020058	167	198	48	112	89	76		WBGene00020058	182	199	151	112	89	76		WBGene00020058	219	200	32	112	89	76		WBGene00020058	146	154	28	112	89	76			WBGene00019089	6.9947	4.40651	4.0522	6.85754	24.1448	74.1624		WBGene00044517	83.0528	47.8393	44.7698	28.3591	23.1574	13.95		WBGene00020343
WBGene00020063	0	2	0	0	0	0		WBGene00020063	0	0	6	0	0	0		WBGene00020063	1	0	0	0	0	0		WBGene00020063	1	0	0	0	0	0			WBGene00019096	76.9417	107.959	35.1191	96.6913	145.763	96.7729		WBGene00021301	30.7181	29.3209	28.2757	8.10261	11.5787	15.023		WBGene00020342
WBGene00020057	0	0	0	0	0	0		WBGene00020057	0	0	0	0	0	0		WBGene00020057	0	0	0	0	0	0		WBGene00020057	0	0	0	0	0	0			WBGene00019095	98.925	110.163	221.52	296.932	264.698	261.377		WBGene00020277	1.13771	6.94442	12.9597	2.43078	24.21	24.6807		WBGene00020341
WBGene00020056	0	0	0	1	0	0		WBGene00020056	0	0	0	1	0	0		WBGene00020056	0	0	0	1	0	0		WBGene00020056	0	0	0	1	0	0			WBGene00019094	31.9758	31.9472	6.75367	30.1732	25.039	9.04419		WBGene00020280	126.286	523.918	666.835	362.187	995.769	1016.2		WBGene00020340
WBGene00005923	0	0	0	0	0	0		WBGene00005923	0	0	0	0	0	0		WBGene00005923	0	0	0	0	0	0		WBGene00005923	0	0	0	0	0	0			WBGene00019090	35.9727	37.4553	6.75367	34.2877	60.809	65.1182		WBGene00020279	56.8855	91.0491	240.343	65.6312	70.5249	81.5536		WBGene00006589
WBGene00005922	0	0	0	0	0	0		WBGene00005922	0	0	0	0	0	0		WBGene00005922	0	0	0	0	0	0		WBGene00005922	0	0	0	0	0	0			WBGene00019092	125.905	129.992	71.5889	75.433	77.7998	106.721		WBGene00020343	128.561	118.055	401.75	171.775	123.155	227.492		WBGene00000111
WBGene00005921	0	2	0	0	0	0		WBGene00005921	0	0	0	0	0	0		WBGene00005921	0	0	0	0	0	0		WBGene00005921	0	0	0	0	0	0			WBGene00021489	11.9909	44.0651	14.8581	34.2877	59.0205	40.6989		WBGene00020342	17.0656	14.6604	28.2757	25.1181	34.7361	34.3384		WBGene00019089
WBGene00018313	0	0	1	0	0	3		WBGene00018313	3	0	2	0	0	3		WBGene00018313	0	3	0	0	0	3		WBGene00018313	0	1	1	0	0	3			WBGene00021491	258.804	96.9432	178.297	23.3156	10.731	58.7873		WBGene00020341	67.1248	102.623	517.209	93.9903	161.049	266.122		WBGene00019096
WBGene00018312	0	1	4	1	7	1		WBGene00018312	0	1	1	1	7	1		WBGene00018312	1	0	0	1	7	1		WBGene00018312	1	2	0	1	7	1			WBGene00021492	15.9879	26.439	6.75367	8.9148	12.5195	23.5149		WBGene00020340	623.465	1152	1115.71	1597.84	1664.18	1778.08		WBGene00019095
WBGene00201947	0	0	0	0	0	0		WBGene00201947	0	0	0	0	0	0		WBGene00201947	0	0	0	0	0	0		WBGene00201947	0	0	0	0	0	0			WBGene00021487	331.749	383.366	364.698	111.778	281.689	333.731		WBGene00006589	42.0952	113.426	326.348	565.562	824.194	864.898		WBGene00019094
WBGene00019561	471	443	200	697	433	266		WBGene00019561	543	702	321	697	433	266		WBGene00019561	324	410	154	697	433	266		WBGene00019561	245	383	52	697	433	266			WBGene00003676	352.733	388.874	1227.82	635.694	654.591	670.175		WBGene00000111	149.04	163.58	405.285	968.262	396.834	617.018		WBGene00019090
WBGene00044778	1	0	1	0	0	3		WBGene00044778	2	2	0	0	0	3		WBGene00044778	5	0	0	0	0	3		WBGene00044778	4	0	0	0	0	3			WBGene00021486	5820.59	3062.52	7118.36	6889.09	6217.72	5009.58		WBGene00019089	5.68855	7.71602	3.53446	8.10261	28.4205	87.9921		WBGene00019092
WBGene00019562	49	52	9	142	144	130		WBGene00019562	25	85	71	142	144	130		WBGene00019562	75	82	4	142	144	130		WBGene00019562	78	22	0	142	144	130			WBGene00021493	203.846	112.366	132.372	197.497	119.83	116.67		WBGene00019096	117.184	114.969	182.614	114.247	171.575	114.819		WBGene00021489
WBGene00019560	6	5	2	7	1	1		WBGene00019560	3	4	2	7	1	1		WBGene00019560	1	10	0	7	1	1		WBGene00019560	3	1	0	7	1	1			WBGene00018099	57.9561	87.0285	745.605	308.589	286.16	188.119		WBGene00019095	113.771	162.808	206.177	350.843	311.573	310.118		WBGene00021491
WBGene00201938	0	0	0	0	0	0		WBGene00201938	0	0	0	0	0	0		WBGene00201938	0	0	0	0	0	0		WBGene00201938	0	0	0	0	0	0			WBGene00018098	94.9281	89.2318	28.3654	82.2905	142.186	97.6773		WBGene00019094	89.879	33.1789	67.1547	35.6515	29.4731	10.7307		WBGene00021492
WBGene00019559	0	0	0	0	0	0		WBGene00019559	0	0	0	0	0	0		WBGene00019559	0	0	0	0	0	0		WBGene00019559	0	0	0	0	0	0			WBGene00000514	55.9576	91.435	178.297	102.177	154.705	208.016		WBGene00019090	51.1969	13.1172	86.0052	40.5131	71.5775	77.2613		WBGene00021487
WBGene00019558	0	0	0	0	0	0		WBGene00019558	0	1	0	0	0	0		WBGene00019558	0	0	0	0	0	0		WBGene00019558	0	0	0	0	0	0			WBGene00194908	615.534	299.642	366.049	53.4888	145.763	143.803		WBGene00019092	97.843	71.759	234.452	89.1287	91.5771	126.623		WBGene00003676
WBGene00019557	0	0	0	0	0	0		WBGene00019557	3	0	4	0	0	0		WBGene00019557	0	1	0	0	0	0		WBGene00019557	0	2	0	0	0	0			WBGene00017720	17.9864	19.8293	32.4176	17.8296	16.9908	27.1326		WBGene00021489	3.41313	30.8641	37.7009	40.5131	69.4723	48.2883		WBGene00021486
WBGene00019563	34	50	25	52	61	63		WBGene00019563	25	28	99	52	61	63		WBGene00019563	24	59	47	52	61	63		WBGene00019563	54	33	14	52	61	63			WBGene00017719	867.343	1230.52	8808.13	1852.91	3348.07	3572.46		WBGene00021491	9.10167	4.62961	553.732	27.5489	12.6313	69.7498		WBGene00021493
WBGene00019556	34	69	15	124	107	81		WBGene00019556	47	63	89	124	107	81		WBGene00019556	70	95	9	124	107	81		WBGene00019556	79	51	3	124	107	81			WBGene00017724	91.9303	181.768	421.429	545.86	781.575	690.072		WBGene00021492	26.1673	14.6604	35.3446	10.5334	14.7365	27.8999		WBGene00018099
WBGene00023103	1	0	0	0	0	1		WBGene00023103	0	0	0	0	0	1		WBGene00023103	1	0	0	0	0	1		WBGene00023103	0	0	0	0	0	1			WBGene00016695	42.9674	4.40651	129.67	49.3743	4.47125	0		WBGene00021487	516.52	557.868	428.848	132.073	331.572	395.964		WBGene00018097
WBGene00235188	0	0	0	0	0	0		WBGene00235188	0	0	0	0	0	0		WBGene00235188	0	0	0	0	0	0		WBGene00235188	0	0	0	0	0	0			WBGene00003612	127.903	118.976	299.863	182.411	177.062	177.266		WBGene00003676	717.894	700.615	614.996	751.112	770.511	795.148		WBGene00018098
WBGene00020155	287	444	854	1421	1539	2023		WBGene00020155	300	578	1028	1421	1539	2023		WBGene00020155	306	445	645	1421	1539	2023		WBGene00020155	1448	350	257	1421	1539	2023			WBGene00021167	271.794	208.207	183.7	598.663	219.091	487.482		WBGene00021486	8304.14	8539.32	4915.25	8139.88	7318.8	5943.76		WBGene00000514
WBGene00020156	74	84	85	69	119	143		WBGene00020156	45	55	48	69	119	143		WBGene00020156	30	62	30	69	119	143		WBGene00020156	139	58	12	69	119	143			WBGene00003723	69.947	79.3171	83.7455	148.123	169.013	158.273		WBGene00021493	177.483	175.925	339.308	233.355	141.05	138.427		WBGene00194908
WBGene00006118	0	0	0	0	0	0		WBGene00006118	0	0	0	0	0	0		WBGene00006118	0	0	0	0	0	0		WBGene00006118	0	0	0	0	0	0			WBGene00018415	51.9606	46.2683	51.3279	61.0321	47.3953	61.5005		WBGene00018099	135.387	156.635	103.677	364.618	336.835	223.199		WBGene00017720
WBGene00044777	90	120	68	224	219	154		WBGene00044777	142	159	94	224	219	154		WBGene00044777	134	154	30	224	219	154		WBGene00044777	149	109	15	224	219	154			WBGene00018414	19.9849	47.3699	0	1.37151	6.25975	11.7575		WBGene00018097	4.55084	5.40122	18.8504	19.4463	2.10522	13.95		WBGene00017719
WBGene00044776	213	118	40	84	62	67		WBGene00044776	191	181	128	84	62	67		WBGene00044776	217	233	46	84	62	67		WBGene00044776	82	163	16	84	62	67			WBGene00003646	82.9371	81.5204	40.522	63.0894	46.501	57.8828		WBGene00018098	56.8855	94.9071	227.384	97.2313	167.365	115.892		WBGene00017724
WBGene00005210	0	0	0	1	5	1		WBGene00005210	2	12	6	1	5	1		WBGene00005210	2	1	1	1	5	1		WBGene00005210	0	0	0	1	5	1			WBGene00003718	140.893	145.415	82.3947	122.75	94.7905	72.3535		WBGene00000514	65.9871	148.148	174.367	120.729	182.102	246.807		WBGene00016695
WBGene00005622	0	0	0	0	0	0		WBGene00005622	0	1	0	0	0	0		WBGene00005622	0	0	0	0	0	0		WBGene00005622	0	0	0	0	0	0			WBGene00003693	122.907	122.281	63.4845	96.6913	57.232	67.8314		WBGene00194908	560.891	498.455	220.315	63.2004	171.575	170.619		WBGene00003612
WBGene00020157	15	15	27	35	20	28		WBGene00020157	22	28	20	35	20	28		WBGene00020157	19	17	14	35	20	28		WBGene00020157	34	38	3	35	20	28			WBGene00003617	177.865	161.939	67.5367	144.008	60.809	67.8314		WBGene00017720	42.0952	27.7777	25.9194	21.0668	19.9996	32.1922		WBGene00021167
WBGene00255731	0	0	0	0	0	0		WBGene00255731	0	0	0	0	0	0		WBGene00255731	0	0	0	0	0	0		WBGene00255731	0	0	0	0	0	0			WBGene00003716	128.902	147.618	28.3654	116.578	48.2895	79.5889		WBGene00017719	3049.06	2665.11	1629.39	2189.33	3940.97	4238.64		WBGene00003723
WBGene00255732	0	0	0	0	0	0		WBGene00255732	0	0	0	0	0	0		WBGene00255732	0	0	0	0	0	0		WBGene00255732	0	0	0	0	0	0			WBGene00003724	321.756	214.817	129.67	272.93	152.023	149.229		WBGene00017724	221.853	261.573	605.571	644.968	919.981	818.756		WBGene00018415
WBGene00255733	0	0	0	0	0	0		WBGene00255733	0	0	0	0	0	0		WBGene00255733	0	0	0	0	0	0		WBGene00255733	0	0	0	0	0	0			WBGene00003686	169.871	155.329	70.2381	138.522	77.7998	80.4933		WBGene00016695	119.459	43.9813	0	58.3388	5.26305	0		WBGene00018414
WBGene00235327	0	0	0	0	0	0		WBGene00235327	0	0	0	0	0	0		WBGene00235327	0	0	0	0	0	0		WBGene00235327	0	0	0	0	0	0			WBGene00018413	96.9265	64.996	68.8874	90.5196	52.7608	69.6403		WBGene00003612	246.883	216.82	144.913	215.529	208.417	210.323		WBGene00003646
WBGene00003550	21	31	34	54	42	69		WBGene00003550	13	24	70	54	42	69		WBGene00003550	49	41	41	54	42	69		WBGene00003550	61	27	15	54	42	69			WBGene00018262	19.9849	33.0488	27.0147	65.1466	18.7793	20.8016		WBGene00021167	281.014	237.653	903.643	707.358	257.889	578.387		WBGene00003718
WBGene00001480	218	185	231	726	321	530		WBGene00001480	180	230	624	726	321	530		WBGene00001480	358	320	204	726	321	530		WBGene00001480	962	202	60	726	321	530			WBGene00018261	99.9243	106.858	41.8727	39.088	57.232	56.074		WBGene00021168	0	6.17282	22.3849	20.2565	4.21044	10.7307		WBGene00003693
WBGene00019241	1333	1073	1275	2062	1640	1713		WBGene00019241	1948	2800	1470	2062	1640	1713		WBGene00019241	1254	1304	1504	2062	1640	1713		WBGene00019241	1786	1739	709	2062	1640	1713			WBGene00018260	282.786	299.642	87.7977	153.609	117.147	134.758		WBGene00003723	136.525	135.802	209.711	175.016	198.943	187.788		WBGene00003617
WBGene00019240	866	1121	2300	2672	2949	2765		WBGene00019240	1415	2736	1945	2672	2949	2765		WBGene00019240	1006	826	2397	2672	2949	2765		WBGene00019240	3207	1602	1122	2672	2949	2765			WBGene00023284	146.889	154.228	55.3801	52.1173	33.0873	53.3607		WBGene00018415	64.8494	60.185	89.5396	72.1132	55.7883	72.969		WBGene00003716
WBGene00019239	6	5	0	2	0	0		WBGene00019239	3	1	1	2	0	0		WBGene00019239	0	2	3	2	0	0		WBGene00019239	0	6	9	2	0	0			WBGene00018265	42.9674	47.3699	132.372	102.177	92.1078	148.325		WBGene00003646	128.561	80.2466	141.378	74.544	54.7357	68.6767		WBGene00003724
WBGene00172957	0	0	0	0	0	0		WBGene00172957	0	0	0	0	0	0		WBGene00172957	0	0	0	0	0	0		WBGene00172957	0	0	0	0	0	0			WBGene00018266	22.9826	30.8455	22.9625	39.088	51.8665	39.7944		WBGene00003718	141.076	80.2466	267.441	145.037	111.577	85.8459		WBGene00003686
WBGene00021747	21	37	120	118	59	53		WBGene00021747	76	79	3	118	59	53		WBGene00021747	40	41	107	118	59	53		WBGene00021747	41	56	47	118	59	53			WBGene00021163	24.9811	16.5244	14.8581	18.5154	9.83675	16.2795		WBGene00003693	141.076	104.166	229.74	114.247	67.3671	80.4806		WBGene00018413
WBGene00021748	116	142	666	978	559	651		WBGene00021748	177	425	368	978	559	651		WBGene00021748	271	267	812	978	559	651		WBGene00021748	633	236	220	978	559	651			WBGene00021162	6.9947	8.81301	0	3.42877	23.2505	21.7061		WBGene00003617	254.847	122.685	294.538	170.155	71.5775	80.4806		WBGene00018262
WBGene00021750	96	51	172	239	90	74		WBGene00021750	133	183	49	239	90	74		WBGene00021750	53	82	174	239	90	74		WBGene00021750	85	119	69	239	90	74			WBGene00044521	5.99546	11.0163	18.9103	7.5433	81.3768	46.1254		WBGene00003716	143.351	115.74	176.723	137.744	56.8409	94.4305		WBGene00018261
WBGene00005024	798	698	1637	1848	1134	1087		WBGene00005024	1194	1587	906	1848	1134	1087		WBGene00005024	894	787	1836	1848	1134	1087		WBGene00005024	1274	1194	599	1848	1134	1087			WBGene00000027	2.99773	15.4228	16.2088	21.9441	117.147	99.4861		WBGene00003724	507.418	301.696	533.703	322.484	178.944	177.057		WBGene00018260
WBGene00196278	0	0	0	0	0	0		WBGene00196278	0	0	0	0	0	0		WBGene00196278	0	0	0	0	0	0		WBGene00196278	0	0	0	0	0	0			WBGene00003649	67.9485	100.248	14.8581	56.2318	17.885	25.3237		WBGene00003686	273.05	127.314	301.607	163.673	91.5771	95.5036		WBGene00023284
WBGene00197318	0	0	0	0	0	0		WBGene00197318	0	0	0	0	0	0		WBGene00197318	0	0	0	0	0	0		WBGene00197318	0	0	0	0	0	0			WBGene00020852	191.855	201.598	147.23	150.18	106.416	110.339		WBGene00018413	58.0232	65.5862	175.545	106.954	62.104	82.6267		WBGene00018265
WBGene00201430	1	1	0	4	2	5		WBGene00201430	0	5	0	4	2	5		WBGene00201430	0	0	1	4	2	5		WBGene00201430	7	0	1	4	2	5			WBGene00020851	35.9727	25.3374	22.9625	21.2584	16.0965	11.7575		WBGene00018262	32.9936	37.0369	48.3043	76.9748	22.1048	24.6807		WBGene00018266
WBGene00200351	0	0	0	0	0	0		WBGene00200351	0	0	0	0	0	0		WBGene00200351	0	0	0	0	0	0		WBGene00200351	0	0	0	0	0	0			WBGene00020849	38.9705	35.2521	9.45513	17.1439	25.039	30.7503		WBGene00018261	30.7181	89.5059	176.723	46.1849	67.3671	66.5306		WBGene00021163
WBGene00006770	122	166	1384	1285	1180	1135		WBGene00006770	202	573	546	1285	1180	1135		WBGene00006770	192	163	1355	1285	1180	1135		WBGene00006770	1288	233	484	1285	1180	1135			WBGene00003705	217.835	230.24	48.6264	30.8589	42.924	37.0812		WBGene00018260	317.421	249.999	493.646	181.499	137.892	159.888		WBGene00021162
WBGene00220173	3	0	0	0	0	0		WBGene00220173	4	2	1	0	0	0		WBGene00220173	1	1	2	0	0	0		WBGene00220173	5	7	0	0	0	0			WBGene00020850	164.875	176.26	43.2235	40.4595	37.5585	40.6989		WBGene00023284	314.008	121.913	213.246	61.5798	38.9466	63.3114		WBGene00044521
WBGene00021749	65	100	1678	1022	1015	880		WBGene00021749	152	561	285	1022	1015	880		WBGene00021749	61	81	1500	1022	1015	880		WBGene00021749	907	165	407	1022	1015	880			WBGene00021235	111.915	166.346	70.2381	63.7751	87.6365	96.7729		WBGene00018265	78.5019	63.2714	153.16	120.729	108.419	175.984		WBGene00000027
WBGene00019971	332	293	3754	1882	1810	1666		WBGene00019971	506	1318	777	1882	1810	1666		WBGene00019971	341	330	3958	1882	1810	1666		WBGene00019971	2492	686	1493	1882	1810	1666			WBGene00021236	34.9735	28.6423	6.75367	0.685754	4.47125	0		WBGene00018266	32.9936	43.2097	53.0169	46.1849	61.0514	47.2153		WBGene00003649
WBGene00019972	61	108	129	431	375	274		WBGene00019972	80	227	144	431	375	274		WBGene00019972	84	96	101	431	375	274		WBGene00019972	215	111	27	431	375	274			WBGene00017501	26788.7	25707.6	8424.52	283.216	4393.45	1666.84		WBGene00021163	29.5804	15.432	48.3043	21.8771	11.5787	19.3153		WBGene00020852
WBGene00019973	49	103	13	49	34	100		WBGene00019973	73	75	214	49	34	100		WBGene00019973	61	136	26	49	34	100		WBGene00019973	90	38	4	49	34	100			WBGene00017498	7662.19	9328.58	2359.73	237.957	1525.59	747.05		WBGene00021162	2.27542	3.85801	93.0741	4.05131	27.3679	25.7538		WBGene00020851
WBGene00019975	117	59	23	80	63	73		WBGene00019975	50	112	82	80	63	73		WBGene00019975	88	116	23	80	63	73		WBGene00019975	71	64	7	80	63	73			WBGene00017490	30.9765	51.7765	9.45513	0.685754	2.68275	2.71326		WBGene00044521	4.55084	1.5432	57.7295	8.91287	95.7875	54.7268		WBGene00020849
WBGene00195716	0	0	0	0	0	0		WBGene00195716	0	0	0	0	0	0		WBGene00195716	0	0	0	0	0	0		WBGene00195716	0	0	0	0	0	0			WBGene00015273	10.9917	23.1342	87.7977	30.8589	66.1745	60.5961		WBGene00000027	1.13771	6.94442	114.281	25.9284	137.892	118.038		WBGene00003705
WBGene00015344	473	878	3260	1908	3932	4782		WBGene00015344	683	1507	2424	1908	3932	4782		WBGene00015344	1143	758	3318	1908	3932	4782		WBGene00015344	7547	1056	1474	1908	3932	4782			WBGene00001758	1252.05	2270.45	1150.82	242.071	2132.79	1513.09		WBGene00003649	84.1905	53.2406	87.1833	66.4414	21.0522	30.0461		WBGene00020850
WBGene00019625	0	3	5	2	0	6		WBGene00019625	2	0	7	2	0	6		WBGene00019625	3	7	4	2	0	6		WBGene00019625	5	5	0	2	0	6			WBGene00021565	87.9334	93.6383	75.6411	40.4595	81.3768	73.258		WBGene00020852	307.181	206.789	235.631	177.447	125.261	130.915		WBGene00021235
WBGene00044515	19	21	8	0	8	6		WBGene00044515	4	4	9	0	8	6		WBGene00044515	7	9	4	0	8	6		WBGene00044515	16	6	1	0	8	6			WBGene00016233	29.9773	51.7765	2.70147	6.85754	5.3655	23.5149		WBGene00020851	72.8134	45.5245	42.4135	25.1181	18.947	13.95		WBGene00017501
WBGene00197358	0	0	0	0	0	0		WBGene00197358	0	0	0	0	0	0		WBGene00197358	0	0	0	0	0	0		WBGene00197358	0	0	0	0	0	0			WBGene00016234	478.637	253.374	502.473	247.557	233.399	232.436		WBGene00020849	35.269	32.4073	53.0169	20.2565	29.4731	36.4845		WBGene00017498
WBGene00201957	0	0	0	0	0	0		WBGene00201957	0	0	0	0	0	0		WBGene00201957	0	0	0	0	0	0		WBGene00201957	0	0	0	0	0	0			WBGene00016230	110.916	53.9797	86.4469	39.7737	30.4045	20.8016		WBGene00003705	144.489	97.2219	128.419	36.4618	50.5253	43.996		WBGene00015273
WBGene00006255	3	0	0	3	3	0		WBGene00006255	0	0	0	3	3	0		WBGene00006255	2	5	4	3	3	0		WBGene00006255	2	1	1	3	3	0			WBGene00018760	1309.01	1597.36	2895.97	798.218	2788.27	1851.35		WBGene00020850	162.692	118.827	76.5799	47.8054	44.2096	48.2883		WBGene00001758
WBGene00019624	84	198	281	379	612	672		WBGene00019624	80	286	386	379	612	672		WBGene00019624	198	175	374	379	612	672		WBGene00019624	1138	130	135	379	612	672			WBGene00018762	652.506	540.899	514.629	535.574	555.33	574.306		WBGene00021235	76.2265	152.777	164.941	75.3543	103.156	114.819		WBGene00021565
WBGene00006129	8	3	1	6	2	2		WBGene00006129	7	6	9	6	2	2		WBGene00006129	6	2	4	6	2	2		WBGene00006129	11	0	0	6	2	2			WBGene00000056	15.9879	22.0325	35.1191	24.0014	16.0965	25.3237		WBGene00017501	31758	13517.7	2313.89	334.638	5171.47	1977.68		WBGene00016233
WBGene00019626	283	317	61	300	282	216		WBGene00019626	279	323	204	300	282	216		WBGene00019626	299	354	50	300	282	216		WBGene00019626	190	249	17	300	282	216			WBGene00018758	415.685	396.586	262.042	268.13	217.303	303.885		WBGene00017498	8933.29	4004.62	1669.44	281.161	1795.75	886.359		WBGene00016234
WBGene00019623	58	61	7	29	26	39		WBGene00019623	63	42	60	29	26	39		WBGene00019623	83	91	13	29	26	39		WBGene00019623	32	37	3	29	26	39			WBGene00194896	26.9796	14.3211	14.8581	2.05726	8.04825	3.61768		WBGene00015273	29.5804	23.9197	40.0572	36.4618	77.8932	71.896		WBGene00016230
WBGene00173041	0	0	0	0	0	0		WBGene00173041	0	0	0	0	0	0		WBGene00173041	0	0	0	0	0	0		WBGene00173041	0	0	0	0	0	0			WBGene00020957	281.786	489.122	2596.11	1251.5	1539.9	1324.97		WBGene00001758	1103.58	2063.26	527.812	286.022	2510.48	1795.25		WBGene00018760
WBGene00268190	14	18	0	14	15	3		WBGene00268190	6	9	7	14	15	3		WBGene00268190	15	33	2	14	15	3		WBGene00268190	12	11	0	14	15	3			WBGene00020962	50.9614	62.7927	245.833	233.156	266.487	249.62		WBGene00021565	79.6396	112.654	84.827	47.8054	95.7875	86.919		WBGene00018762
WBGene00268189	1	0	0	0	0	2		WBGene00268189	2	0	0	0	0	2		WBGene00268189	0	1	0	0	0	2		WBGene00268189	0	5	0	0	0	2			WBGene00020955	119.909	183.972	940.11	403.223	581.263	494.717		WBGene00016233	5.68855	12.3456	21.2068	8.10261	6.31566	27.8999		WBGene00000056
WBGene00021746	4	0	0	1	0	0		WBGene00021746	2	1	0	1	0	0		WBGene00021746	1	2	1	1	0	0		WBGene00021746	4	9	2	1	0	0			WBGene00003579	31.9758	69.4025	180.998	205.726	356.806	366.29		WBGene00016234	610.95	491.511	534.881	292.504	274.731	275.78		WBGene00018758
WBGene00021745	54	32	29	21	17	12		WBGene00021745	53	64	7	21	17	12		WBGene00021745	40	18	11	21	17	12		WBGene00021745	39	115	15	21	17	12			WBGene00020954	219.833	251.171	422.78	583.577	657.274	746.146		WBGene00016230	193.411	104.938	14.1378	46.9951	35.7887	24.6807		WBGene00194896
WBGene00021744	3	4	0	0	1	5		WBGene00021744	0	3	1	0	1	5		WBGene00021744	3	7	0	0	1	5		WBGene00021744	4	0	0	0	1	5			WBGene00020952	118.91	186.175	583.517	288.017	540.127	554.409		WBGene00018760	2028.54	3085.64	604.392	943.144	3282.04	2196.58		WBGene00020957
WBGene00021743	408	249	396	484	235	240		WBGene00021743	908	810	185	484	235	240		WBGene00021743	413	291	485	484	235	240		WBGene00021743	297	1123	483	484	235	240			WBGene00020953	559.576	564.033	798.283	407.338	505.251	507.379		WBGene00018762	902.203	712.96	371.118	632.814	653.671	681.402		WBGene00020962
WBGene00021741	8	4	27	26	6	5		WBGene00021741	9	13	12	26	6	5		WBGene00021741	3	5	23	26	6	5		WBGene00021741	21	9	7	26	6	5			WBGene00021564	132.899	220.325	678.068	391.566	515.088	532.703		WBGene00000056	35.269	24.6913	31.8101	28.3591	18.947	30.0461		WBGene00020955
WBGene00021740	57	74	74	293	212	236		WBGene00021740	72	111	126	293	212	236		WBGene00021740	83	65	73	293	212	236		WBGene00021740	112	64	19	293	212	236			WBGene00021563	174.867	294.134	1279.14	581.52	815.556	755.19		WBGene00018758	368.618	325.616	975.511	316.812	255.784	360.553		WBGene00003579
WBGene00196172	3	0	0	0	0	0		WBGene00196172	0	0	0	0	0	0		WBGene00196172	0	0	0	0	0	0		WBGene00196172	1	0	0	0	0	0			WBGene00021562	793.399	1744.98	12301.1	4728.96	8826.25	8438.23		WBGene00194896	73.9511	26.2345	4.71261	2.43078	9.47349	4.2923		WBGene00020954
WBGene00021072	13	2	6	52	14	105		WBGene00021072	13	8	161	52	14	105		WBGene00021072	4	67	20	52	14	105		WBGene00021072	5	14	4	52	14	105			WBGene00016048	902.316	1058.66	2625.83	2535.23	2562.92	2531.47		WBGene00020957	769.091	1153.55	742.236	1478.73	1812.59	1572.05		WBGene00020952
WBGene00000785	1038	1833	5119	12691	12978	14751		WBGene00000785	1764	4577	5401	12691	12978	14751		WBGene00000785	732	1082	3975	12691	12978	14751		WBGene00000785	13725	2508	1148	12691	12978	14751			WBGene00016052	75.9424	57.2846	39.1713	853.078	191.37	768.756		WBGene00020962	161.555	185.956	181.436	275.489	313.678	296.168		WBGene00020953
WBGene00021070	228	160	180	225	199	261		WBGene00021070	170	281	259	225	199	261		WBGene00021070	127	94	104	225	199	261		WBGene00021070	327	137	43	225	199	261			WBGene00000977	521.605	643.35	248.535	274.987	247.707	319.26		WBGene00020955	254.847	351.079	382.9	476.434	684.197	586.972		WBGene00021564
WBGene00200572	0	0	0	0	0	0		WBGene00200572	0	0	0	0	0	0		WBGene00200572	0	0	0	0	0	0		WBGene00200572	0	0	0	0	0	0			WBGene00000978	25.9803	18.7277	18.9103	32.2304	18.7793	18.0884		WBGene00003579	100.118	128.858	201.464	243.078	419.991	434.595		WBGene00021563
WBGene00020663	14	18	1	13	20	49		WBGene00020663	5	25	29	13	20	49		WBGene00020663	21	29	4	13	20	49		WBGene00020663	55	23	0	13	20	49			WBGene00004130	1238.06	2459.93	13423.6	4654.21	11528.7	13280.5		WBGene00020954	478.976	463.733	1042.67	689.532	773.668	885.286		WBGene00021562
WBGene00219734	47	71	47	78	59	113		WBGene00219734	71	98	86	78	59	113		WBGene00219734	59	44	38	78	59	113		WBGene00219734	155	72	11	78	59	113			WBGene00018823	1809.63	2425.78	1951.81	392.251	1335.12	1112.44		WBGene00020952	114.909	199.073	585.542	340.31	635.777	657.794		WBGene00016048
WBGene00000552	638	1375	6659	7305	9283	9254		WBGene00000552	1146	3413	3755	7305	9283	9254		WBGene00000552	627	628	5857	7305	9283	9254		WBGene00000552	12023	1709	2427	7305	9283	9254			WBGene00020183	201.847	156.431	268.796	224.242	148.446	130.236		WBGene00020953	977.292	683.64	433.56	481.295	594.725	601.995		WBGene00016052
WBGene00020664	2	10	4	11	10	17		WBGene00020664	3	13	7	11	10	17		WBGene00020664	9	10	1	11	10	17		WBGene00020664	9	5	4	11	10	17			WBGene00020182	81.9379	76.0122	44.5742	61.0321	46.501	79.5889		WBGene00021564	308.319	350.307	868.299	462.659	606.303	632.041		WBGene00019885
WBGene00196225	0	0	0	0	0	0		WBGene00196225	0	0	0	0	0	0		WBGene00196225	0	0	0	0	0	0		WBGene00196225	4	0	0	0	0	0			WBGene00018138	611.537	638.943	1615.48	219.441	1246.59	2304.46		WBGene00021563	369.755	577.158	643.271	687.101	959.98	896.017		WBGene00000977
WBGene00198904	0	0	0	0	0	4		WBGene00198904	0	0	2	0	0	4		WBGene00198904	1	0	0	0	0	4		WBGene00198904	2	0	0	0	0	4			WBGene00018140	204.845	172.955	70.2381	55.5461	19.6735	36.1768		WBGene00021562	1876.08	2592.58	4957.67	5587.56	10389.3	10011.8		WBGene00000978
WBGene00004230	87	328	109	137	595	1108		WBGene00004230	20	121	1011	137	595	1108		WBGene00004230	526	511	41	137	595	1108		WBGene00004230	1689	159	20	137	595	1108			WBGene00002055	350.734	458.277	1289.95	2547.58	1361.94	1418.13		WBGene00016048	1836.26	1934.41	2864.09	2995.54	3016.78	3003.53		WBGene00004130
WBGene00202436	5	0	0	0	0	3		WBGene00202436	0	0	5	0	0	3		WBGene00202436	1	4	0	0	0	3		WBGene00202436	4	1	0	0	0	3			WBGene00016281	42.9674	12.1179	16.2088	65.1466	10.731	18.9928		WBGene00016052	469.874	131.172	1080.37	1007.96	225.259	912.113		WBGene00018823
WBGene00197740	0	0	0	0	0	0		WBGene00197740	0	0	0	0	0	0		WBGene00197740	0	0	0	0	0	0		WBGene00197740	0	0	0	0	0	0			WBGene00016282	174.867	266.594	87.7977	26.7444	92.1078	97.6773		WBGene00019885	19.3411	6.94442	5.89076	11.3437	12.6313	9.65767		WBGene00020183
WBGene00020662	1949	3694	15202	19486	25960	25670		WBGene00020662	4237	10574	11348	19486	25960	25670		WBGene00020662	2026	2101	11941	19486	25960	25670		WBGene00020662	28660	6744	10303	19486	25960	25670			WBGene00016283	130.901	113.468	714.538	327.105	253.073	159.178		WBGene00000977	661.009	503.085	401.75	324.915	291.573	378.795		WBGene00020182
WBGene00017764	13	10	16	15	21	23		WBGene00017764	23	34	4	15	21	23		WBGene00017764	9	2	27	15	21	23		WBGene00017764	44	12	7	15	21	23			WBGene00016285	49.9621	36.3537	5.40293	27.4302	33.0873	22.6105		WBGene00000978	35.269	24.6913	75.4018	38.0823	22.1048	21.4615		WBGene00018138
WBGene00268191	0	0	0	0	0	0		WBGene00268191	1	0	0	0	0	0		WBGene00268191	0	0	0	0	0	0		WBGene00268191	0	0	0	0	0	0			WBGene00019105	206.843	245.663	375.504	421.053	457.856	652.991		WBGene00004130	2099.07	3067.12	8247.07	5499.24	13570.3	15757		WBGene00018140
WBGene00021737	3	0	0	0	0	0		WBGene00021737	0	0	0	0	0	0		WBGene00021737	0	0	0	0	0	0		WBGene00021737	1	0	0	0	0	0			WBGene00019104	5.99546	5.50813	4.0522	21.9441	16.9908	20.8016		WBGene00018823	1748.66	2546.29	623.243	463.469	1571.55	1319.88		WBGene00002055
WBGene00200332	0	0	0	0	0	0		WBGene00200332	0	0	0	0	0	0		WBGene00200332	0	0	0	0	0	0		WBGene00200332	0	0	0	0	0	0			WBGene00019108	118.91	81.5204	18.9103	53.4888	6.25975	22.6105		WBGene00020183	365.205	312.499	237.987	264.955	174.733	154.523		WBGene00016281
WBGene00197345	0	0	0	0	0	0		WBGene00197345	0	0	0	0	0	0		WBGene00197345	0	0	0	0	0	0		WBGene00197345	0	0	0	0	0	0			WBGene00016849	159.879	113.468	66.1859	86.405	50.078	73.258		WBGene00020182	78.5019	57.0986	45.948	72.1132	54.7357	94.4305		WBGene00016282
WBGene00021738	99	130	538	495	438	380		WBGene00021738	171	273	284	495	438	380		WBGene00021738	155	161	628	495	438	380		WBGene00021738	586	173	248	495	438	380			WBGene00016860	82.9371	99.1464	168.842	126.865	196.735	227.914		WBGene00018138	1675.85	853.392	210.889	259.284	1467.34	2734.19		WBGene00016283
WBGene00021736	147	119	535	575	395	360		WBGene00021736	350	475	216	575	395	360		WBGene00021736	97	135	564	575	395	360		WBGene00021736	351	227	186	575	395	360			WBGene00017175	49.9621	57.2846	99.9543	225.613	176.167	135.663		WBGene00018140	362.929	127.314	180.257	65.6312	23.1574	42.923		WBGene00016285
WBGene00195169	54	41	20	73	86	61		WBGene00195169	46	79	45	73	86	61		WBGene00195169	28	44	27	73	86	61		WBGene00195169	40	34	5	73	86	61			WBGene00017172	32.975	50.6748	1.35073	25.3729	28.616	27.1326		WBGene00002055	562.028	692.899	1229.99	3010.12	1603.13	1682.58		WBGene00019105
WBGene00219759	0	1	1	2	0	1		WBGene00219759	0	2	0	2	0	1		WBGene00219759	0	0	1	2	0	1		WBGene00219759	0	0	0	2	0	1			WBGene00016474	344.739	722.667	124.267	97.3771	156.494	155.56		WBGene00016281	76.2265	31.6357	220.315	76.9748	12.6313	22.5346		WBGene00019104
WBGene00021739	299	196	51	157	114	80		WBGene00021739	375	260	206	157	114	80		WBGene00021739	246	262	108	157	114	80		WBGene00021739	96	207	53	157	114	80			WBGene00016481	92.9296	169.651	16.2088	18.5154	21.462	7.23535		WBGene00016282	110.358	212.191	226.205	31.6002	108.419	115.892		WBGene00019108
WBGene00021735	150	236	847	767	594	561		WBGene00021735	303	486	304	767	594	561		WBGene00021735	303	259	1024	767	594	561		WBGene00021735	703	404	308	767	594	561			WBGene00016483	7.99394	72.7074	5.40293	0.685754	5.3655	6.33094		WBGene00016283	211.614	242.283	259.194	386.495	297.889	188.861		WBGene00016849
WBGene00235315	87	95	6	49	57	59		WBGene00235315	92	86	88	49	57	59		WBGene00235315	152	181	9	49	57	59		WBGene00235315	50	68	11	49	57	59			WBGene00022260	1502.86	1641.42	537.592	351.792	629.552	660.226		WBGene00016285	35.269	33.9505	37.7009	32.4104	38.9466	26.8269		WBGene00016860
WBGene00255579	12	16	1	4	2	4		WBGene00255579	17	13	31	4	2	4		WBGene00255579	24	23	5	4	2	4		WBGene00255579	12	31	1	4	2	4			WBGene00022259	154.883	138.805	93.2006	89.8338	95.6848	92.2508		WBGene00019105	233.23	385.03	1006.14	497.5	538.936	774.76		WBGene00017175
WBGene00016539	107	197	229	420	483	575		WBGene00016539	92	164	744	420	483	575		WBGene00016539	246	269	268	420	483	575		WBGene00016539	775	159	76	420	483	575			WBGene00022258	214.837	317.268	66.1859	97.3771	91.2135	124.81		WBGene00019104	1.13771	6.94442	12.9597	25.9284	19.9996	24.6807		WBGene00017172
WBGene00199913	0	2	3	14	9	3		WBGene00199913	0	0	6	14	9	3		WBGene00199913	1	0	1	14	9	3		WBGene00199913	6	0	0	14	9	3			WBGene00044525	18.9856	20.9309	6.75367	3.42877	5.3655	7.23535		WBGene00019108	163.83	44.7529	127.241	63.2004	7.36827	26.8269		WBGene00016474
WBGene00195268	0	0	0	0	0	0		WBGene00195268	0	0	3	0	0	0		WBGene00195268	0	0	0	0	0	0		WBGene00195268	3	0	0	0	0	0			WBGene00019525	73.944	110.163	28.3654	87.7765	69.7515	86.8243		WBGene00016849	137.663	82.5614	176.723	102.093	58.9462	86.919		WBGene00016481
WBGene00016538	20	39	7	39	29	42		WBGene00016538	26	59	53	39	29	42		WBGene00016538	39	42	15	39	29	42		WBGene00016538	52	35	4	39	29	42			WBGene00000168	132.899	188.378	2516.42	814.676	938.069	751.572		WBGene00016860	120.597	128.858	259.194	149.898	231.574	270.415		WBGene00022260
WBGene00004266	1296	2147	4466	6361	6504	6665		WBGene00004266	2032	4417	4921	6361	6504	6665		WBGene00004266	3248	2542	5304	6361	6504	6665		WBGene00004266	7561	2820	1847	6361	6504	6665			WBGene00235094	140.893	24.2358	67.5367	40.4595	30.4045	10.853		WBGene00017175	65.9871	118.827	174.367	266.576	207.364	160.961		WBGene00022259
WBGene00198782	1	0	0	1	4	0		WBGene00198782	0	2	1	1	4	0		WBGene00198782	0	4	0	1	4	0		WBGene00198782	0	2	1	1	4	0			WBGene00001771	55.9576	123.382	4.0522	12.3436	25.039	47.9342		WBGene00017172	46.6461	33.9505	80.1144	29.9797	33.6835	32.1922		WBGene00022258
WBGene00016540	85	61	110	210	144	236		WBGene00016540	87	123	146	210	144	236		WBGene00016540	90	125	132	210	144	236		WBGene00016540	303	107	80	210	144	236			WBGene00020878	12.9902	20.9309	1.35073	43.8883	17.885	16.2795		WBGene00016474	336.762	288.579	335.774	115.057	184.207	184.569		WBGene00019525
WBGene00022288	116	101	31	113	81	48		WBGene00022288	109	83	71	113	81	48		WBGene00022288	112	140	19	113	81	48		WBGene00022288	70	130	7	113	81	48			WBGene00020879	31.9758	2.20325	6.75367	14.4008	10.731	6.33094		WBGene00016481	75.0888	54.0122	87.1833	21.8771	25.2626	8.58459		WBGene00000168
WBGene00022289	18	20	5	35	44	33		WBGene00022289	6	24	25	35	44	33		WBGene00022289	17	20	1	35	44	33		WBGene00022289	21	7	1	35	44	33			WBGene00020881	2.99773	1.10163	0	39.7737	5.3655	14.4707		WBGene00022260	1124.06	1202.16	1193.47	415.664	741.038	783.344		WBGene00235094
WBGene00004053	224	245	2215	1452	1672	1850		WBGene00004053	300	715	995	1452	1672	1850		WBGene00004053	504	350	1911	1452	1672	1850		WBGene00004053	2824	512	634	1452	1672	1850			WBGene00020883	324.754	385.569	72.9396	61.0321	65.2803	56.074		WBGene00022259	205.925	141.975	133.131	106.144	112.629	109.454		WBGene00001771
WBGene00044747	0	0	0	0	0	0		WBGene00044747	0	0	0	0	0	0		WBGene00044747	0	0	0	0	0	0		WBGene00044747	0	0	0	0	0	0			WBGene00020869	154.883	176.26	41.8727	177.61	102.839	182.693		WBGene00022258	210.476	138.117	168.476	115.057	107.366	148.084		WBGene00020878
WBGene00001171	47	96	77	149	155	222		WBGene00001171	24	110	211	149	155	222		WBGene00001171	126	179	55	149	155	222		WBGene00001171	314	84	15	149	155	222			WBGene00018055	4.99621	1.10163	4.0522	30.8589	28.616	24.4193		WBGene00019525	60.2986	84.8762	153.16	103.713	82.1036	103.015		WBGene00020879
WBGene00201332	0	0	0	0	0	2		WBGene00201332	0	0	1	0	0	2		WBGene00201332	0	0	0	0	0	2		WBGene00201332	1	1	0	0	0	2			WBGene00018056	37.9712	39.6586	10.8059	4.80028	7.154	23.5149		WBGene00000168	395.923	533.177	333.417	962.59	1104.19	891.725		WBGene00020881
WBGene00017502	11	9	5	23	10	14		WBGene00017502	28	6	14	23	10	14		WBGene00017502	8	11	4	23	10	14		WBGene00017502	14	23	2	23	10	14			WBGene00018054	10.9917	33.0488	9.45513	3.42877	14.308	10.853		WBGene00235094	311.732	125.771	24.7412	47.8054	35.7887	12.8769		WBGene00020883
WBGene00044774	180	191	31	158	92	77		WBGene00044774	225	166	226	158	92	77		WBGene00044774	318	321	58	158	92	77		WBGene00044774	124	251	19	158	92	77			WBGene00018060	18.9856	22.0325	122.917	65.8324	112.676	190.832		WBGene00001771	26.1673	38.5801	80.1144	14.5847	29.4731	56.8729		WBGene00020869
WBGene00220206	3	1	0	0	2	2		WBGene00220206	0	3	0	0	2	2		WBGene00220206	1	0	1	0	2	2		WBGene00220206	1	0	0	0	2	2			WBGene00018061	21.9833	39.6586	141.827	72.0042	76.9055	117.575		WBGene00020878	48.9215	21.6049	38.879	51.8567	21.0522	19.3153		WBGene00018055
WBGene00022285	29	44	9	70	38	26		WBGene00022285	38	58	35	70	38	26		WBGene00022285	62	79	15	70	38	26		WBGene00022285	51	85	6	70	38	26			WBGene00018052	156.881	79.3171	101.305	220.127	86.7423	157.369		WBGene00020873	34.1313	14.6604	31.8101	12.1539	4.21044	10.7307		WBGene00018056
WBGene00197907	0	0	0	0	0	0		WBGene00197907	0	0	0	0	0	0		WBGene00197907	0	0	0	0	0	0		WBGene00197907	0	0	0	0	0	0			WBGene00015879	5.99546	19.8293	8.1044	8.22905	5.3655	13.5663		WBGene00020879	25.0296	17.7469	17.6723	17.0155	12.6313	7.51152		WBGene00018054
WBGene00199852	0	0	0	0	0	0		WBGene00199852	0	0	0	0	0	0		WBGene00199852	0	0	0	0	0	0		WBGene00199852	0	0	0	0	0	0			WBGene00015878	0.999243	1.10163	0	47.317	11.6253	37.0812		WBGene00020881	5.68855	3.85801	22.3849	46.9951	6.31566	17.1692		WBGene00018060
WBGene00199049	0	0	0	3	0	2		WBGene00199049	0	0	0	3	0	2		WBGene00199049	0	0	0	3	0	2		WBGene00199049	1	3	0	3	0	2			WBGene00015885	393.702	387.773	106.708	56.9176	64.386	75.0668		WBGene00020883	459.635	199.845	162.585	72.1132	76.8405	66.5306		WBGene00018061
WBGene00022284	85	103	34	179	119	130		WBGene00022284	55	109	142	179	119	130		WBGene00022284	108	137	47	179	119	130		WBGene00022284	140	74	30	179	119	130			WBGene00015437	23.9818	12.1179	18.9103	14.4008	17.885	18.9928		WBGene00020869	215.027	143.518	237.987	209.858	121.05	216.761		WBGene00018052
WBGene00004923	69	63	35	126	61	68		WBGene00004923	86	120	121	126	61	68		WBGene00004923	112	121	48	126	61	68		WBGene00004923	116	84	9	126	61	68			WBGene00015434	169.871	100.248	235.028	296.246	132.349	179.979		WBGene00018055	53.4723	25.4629	2.35631	36.4618	33.6835	28.973		WBGene00015879
WBGene00196449	1	0	0	0	1	0		WBGene00196449	0	0	1	0	1	0		WBGene00196449	0	0	1	0	1	0		WBGene00196449	0	1	0	0	1	0			WBGene00015433	46.9644	29.7439	9.45513	57.6034	53.655	45.221		WBGene00018056	55.7477	29.3209	50.6606	5.67183	8.42088	27.8999		WBGene00015878
WBGene00022286	392	430	3650	3434	3410	3232		WBGene00022286	694	1501	1071	3434	3410	3232		WBGene00022286	440	542	3856	3434	3410	3232		WBGene00022286	2830	999	1494	3434	3410	3232			WBGene00015440	18.9856	9.91464	24.3132	33.602	20.5678	35.2724		WBGene00018054	44.3707	11.574	18.8504	4.05131	16.8418	12.8769		WBGene00015884
WBGene00022287	30	277	43	159	838	1560		WBGene00022287	13	78	607	159	838	1560		WBGene00022287	69	99	10	159	838	1560		WBGene00022287	1170	33	1	159	838	1560			WBGene00015441	5.99546	3.30488	10.8059	22.6299	23.2505	21.7061		WBGene00018060	25.0296	35.4937	131.953	77.7851	132.629	226.419		WBGene00015885
WBGene00004925	120	94	247	242	216	234		WBGene00004925	132	239	116	242	216	234		WBGene00004925	130	125	128	242	216	234		WBGene00004925	193	161	48	242	216	234			WBGene00020617	54.9584	59.4878	5.40293	55.5461	30.4045	87.7287		WBGene00018061	22.7542	40.1233	96.6085	85.0774	90.5245	139.5		WBGene00015437
WBGene00195319	0	0	0	2	1	0		WBGene00195319	0	0	0	2	1	0		WBGene00195319	1	0	0	2	1	0		WBGene00195319	2	0	0	2	1	0			WBGene00020616	48.9629	64.996	4.0522	46.6313	33.9815	46.1254		WBGene00018052	238.919	172.839	182.614	260.094	102.103	186.715		WBGene00015435
WBGene00020017	50	223	61	129	758	758		WBGene00020017	6	85	341	129	758	758		WBGene00020017	91	114	5	129	758	758		WBGene00020017	532	55	1	129	758	758			WBGene00020615	33.9743	49.5732	2.70147	15.0866	10.731	13.5663		WBGene00015879	23.8919	14.6604	34.1664	9.72313	6.31566	16.0961		WBGene00015434
WBGene00001578	282	374	457	912	727	1070		WBGene00001578	474	601	991	912	727	1070		WBGene00001578	560	713	766	912	727	1070		WBGene00001578	790	385	196	912	727	1070			WBGene00020612	4.99621	19.8293	47.2757	40.4595	98.3675	109.435		WBGene00015878	20.4788	8.48762	32.9883	55.908	13.6839	43.996		WBGene00015433
WBGene00019976	6	6	1	12	6	21		WBGene00019976	1	5	12	12	6	21		WBGene00019976	2	12	1	12	6	21		WBGene00019976	10	1	3	12	6	21			WBGene00020611	75.9424	84.8253	37.8205	61.0321	33.0873	14.4707		WBGene00015884	1.13771	3.08641	11.7815	28.3591	3.15783	11.8038		WBGene00015440
WBGene00019979	195	204	211	235	245	313		WBGene00019979	157	270	350	235	245	313		WBGene00019979	291	236	160	235	245	313		WBGene00019979	500	242	103	235	245	313			WBGene00020609	28.978	9.91464	10.8059	12.3436	12.5195	8.13977		WBGene00015885	530.172	209.104	139.022	67.2517	75.7879	89.0652		WBGene00015441
WBGene00044900	3	1	0	11	0	3		WBGene00044900	17	2	6	11	0	3		WBGene00044900	0	2	2	11	0	3		WBGene00044900	1	1	2	11	0	3			WBGene00000478	17.9864	39.6586	43.2235	22.6299	68.8573	90.4419		WBGene00015437	40.9575	13.1172	23.5631	17.0155	21.0522	22.5346		WBGene00020617
WBGene00000555	1	0	0	0	1	0		WBGene00000555	0	0	0	0	1	0		WBGene00000555	1	0	0	0	1	0		WBGene00000555	0	0	0	0	1	0			WBGene00017868	53.9591	58.3862	63.4845	89.148	60.809	74.1624		WBGene00015435	37.5444	11.574	10.6034	2.43078	7.36827	4.2923		WBGene00020616
WBGene00000559	0	0	0	1	0	0		WBGene00000559	0	2	1	1	0	0		WBGene00000559	0	0	0	1	0	0		WBGene00000559	0	0	0	1	0	0			WBGene00017867	154.883	106.858	101.305	203.669	164.542	128.428		WBGene00015434	326.523	220.678	259.194	350.033	155.786	213.542		WBGene00020615
WBGene00000558	326	443	41	303	406	586		WBGene00000558	68	127	151	303	406	586		WBGene00000558	347	257	23	303	406	586		WBGene00000558	476	114	8	303	406	586			WBGene00001781	48.9629	59.4878	28.3654	41.1453	32.193	51.5519		WBGene00015433	89.879	65.5862	68.3329	68.0619	63.1566	53.6537		WBGene00020612
WBGene00000557	147	227	9	15	53	167		WBGene00000557	23	53	291	15	53	167		WBGene00000557	202	298	9	15	53	167		WBGene00000557	387	103	15	15	53	167			WBGene00003096	396.699	654.366	1433.13	2641.53	2095.23	3507.34		WBGene00015440	6.82625	20.0617	44.7698	39.7028	24.21	41.8499		WBGene00020611
WBGene00000556	155	116	17	11	11	20		WBGene00000556	8	9	13	11	11	20		WBGene00000556	49	47	4	11	11	20		WBGene00000556	65	38	7	11	11	20			WBGene00015577	618.531	564.033	942.812	397.052	470.376	490.195		WBGene00015441	5.68855	7.71602	24.7412	26.7386	27.3679	25.7538		WBGene00020609
WBGene00005611	0	1	0	1	0	0		WBGene00005611	0	0	1	1	0	0		WBGene00005611	0	0	0	1	0	0		WBGene00005611	2	1	0	1	0	0			WBGene00015574	57.9561	88.1301	24.3132	10.2863	13.4138	19.8972		WBGene00020619	25.0296	7.71602	25.9194	10.5334	8.42088	3.21922		WBGene00000478
WBGene00174088	7	2	0	3	1	0		WBGene00174088	1	3	8	3	1	0		WBGene00174088	6	2	0	3	1	0		WBGene00174088	2	1	0	3	1	0			WBGene00003683	31.9758	15.4228	9.45513	18.5154	19.6735	18.0884		WBGene00020617	63.7117	66.3578	234.452	65.6312	35.7887	104.088		WBGene00017868
WBGene00019980	147	149	17	112	75	69		WBGene00019980	128	138	104	112	75	69		WBGene00019980	133	187	18	112	75	69		WBGene00019980	59	122	10	112	75	69			WBGene00020756	95.9273	80.4188	289.057	111.778	151.128	100.391		WBGene00020616	68.2625	43.2097	123.706	55.0978	39.9992	54.7268		WBGene00017867
WBGene00019978	1378	640	2062	2815	2057	2752		WBGene00019978	2408	2959	3208	2815	2057	2752		WBGene00019978	945	1968	3176	2815	2057	2752		WBGene00019978	1194	1036	675	2815	2057	2752			WBGene00020744	71.9455	69.4025	36.4698	33.602	33.9815	44.3165		WBGene00020615	11.3771	20.0617	23.5631	17.8257	12.6313	16.0961		WBGene00001781
WBGene00019977	33	21	122	119	53	73		WBGene00019977	66	100	37	119	53	73		WBGene00019977	58	57	158	119	53	73		WBGene00019977	54	79	60	119	53	73			WBGene00001736	2.99773	0	8.1044	3.42877	213.726	263.186		WBGene00020613	12.5148	10.8024	12.9597	3.24104	13.6839	8.58459		WBGene00003096
WBGene00004139	56	231	186	437	1727	1260		WBGene00004139	13	130	310	437	1727	1260		WBGene00004139	136	104	37	437	1727	1260		WBGene00004139	709	68	14	437	1727	1260			WBGene00020696	1764.66	3364.37	29679.7	7865.6	15853.3	13848.5		WBGene00020612	19.3411	44.7529	68.3329	47.8054	115.787	129.842		WBGene00015577
WBGene00018757	199	192	204	534	270	294		WBGene00018757	241	331	395	534	270	294		WBGene00018757	241	248	367	534	270	294		WBGene00018757	356	191	89	534	270	294			WBGene00004422	20276.6	14067.8	24984.5	24465	24120.6	20074.5		WBGene00020611	155.866	102.623	48.3043	72.1132	38.9466	17.1692		WBGene00015574
WBGene00006794	1078	2326	10735	9989	11903	11596		WBGene00006794	2075	5328	5032	9989	11903	11596		WBGene00006794	1978	1713	11029	9989	11903	11596		WBGene00006794	14834	3090	4655	9989	11903	11596			WBGene00020695	240.818	257.781	1612.78	745.415	854.903	804.029		WBGene00020609	51.1969	47.0677	25.9194	14.5847	14.7365	9.65767		WBGene00003683
WBGene00016513	111	71	75	296	81	110		WBGene00016513	114	126	221	296	81	110		WBGene00016513	69	141	126	296	81	110		WBGene00016513	141	80	29	296	81	110			WBGene00023145	26.9796	33.0488	10.8059	10.2863	30.4045	39.7944		WBGene00000478	11.3771	20.0617	73.0455	26.7386	81.051	107.307		WBGene00020756
WBGene00016514	3	6	4	10	12	13		WBGene00016514	3	3	10	10	12	13		WBGene00016514	2	4	5	10	12	13		WBGene00016514	6	1	0	10	12	13			WBGene00044705	8.99318	8.81301	4.0522	15.0866	10.731	6.33094		WBGene00017868	69.4003	83.333	110.746	105.334	71.5775	87.9921		WBGene00020744
WBGene00045390	62	62	16	35	46	28		WBGene00045390	44	43	34	35	46	28		WBGene00045390	41	82	6	35	46	28		WBGene00045390	27	51	7	35	46	28			WBGene00020697	42.9674	18.7277	28.3654	15.0866	9.83675	8.13977		WBGene00017867	193.411	189.043	213.246	240.648	193.68	152.377		WBGene00001736
WBGene00016512	188	149	202	725	499	376		WBGene00016512	245	540	186	725	499	376		WBGene00016512	72	122	148	725	499	376		WBGene00016512	217	132	50	725	499	376			WBGene00020698	49.9621	31.9472	13.5073	31.5447	18.7793	17.184		WBGene00001781	67.1248	112.654	90.7178	48.6157	37.894	61.1652		WBGene00020696
WBGene00005690	5	17	0	0	1	1		WBGene00005690	3	7	2	0	1	1		WBGene00005690	21	13	0	0	1	1		WBGene00005690	10	9	0	0	1	1			WBGene00020699	37.9712	13.2195	20.261	160.466	19.6735	42.5077		WBGene00003096	1956.86	2037.03	4144.74	3121.13	2466.27	4161.38		WBGene00004422
WBGene00016516	12	23	6	128	166	104		WBGene00016516	16	47	48	128	166	104		WBGene00016516	25	26	6	128	166	104		WBGene00016516	99	19	0	128	166	104			WBGene00020700	154.883	22.0325	22.9625	8105.61	282.583	2398.52		WBGene00015577	695.14	900.46	431.204	469.141	553.673	581.606		WBGene00020695
WBGene00005691	4	4	0	2	2	3		WBGene00005691	3	16	1	2	2	3		WBGene00005691	2	6	0	2	2	3		WBGene00005691	1	6	0	2	2	3			WBGene00019097	1250.05	1396.86	2162.52	2029.15	2659.5	2702.4		WBGene00015574	78.5019	68.6726	68.3329	12.1539	15.7892	23.6076		WBGene00023145
WBGene00016517	1	4	0	5	3	2		WBGene00016517	0	2	8	5	3	2		WBGene00016517	3	3	2	5	3	2		WBGene00016517	18	2	0	5	3	2			WBGene00019100	81.9379	79.3171	185.05	97.3771	115.358	145.612		WBGene00003683	22.7542	34.7221	24.7412	21.8771	23.1574	21.4615		WBGene00044705
WBGene00023317	0	0	0	2	0	1		WBGene00023317	0	0	0	2	0	1		WBGene00023317	1	0	0	2	0	1		WBGene00023317	0	1	0	2	0	1			WBGene00019101	25.9803	16.5244	17.5595	8.22905	4.47125	6.33094		WBGene00020756	155.866	145.833	87.1833	132.073	177.891	119.111		WBGene00020697
WBGene00006268	0	3	0	0	0	0		WBGene00006268	0	1	0	0	0	0		WBGene00006268	0	3	0	0	0	0		WBGene00006268	0	0	0	0	0	0			WBGene00000062	18.9856	36.3537	9.45513	8.22905	16.0965	14.4707		WBGene00020744	134.25	84.8762	55.3732	39.7028	39.9992	52.5806		WBGene00020698
WBGene00006270	3	1	0	0	1	0		WBGene00006270	0	0	0	0	1	0		WBGene00006270	2	1	0	0	1	0		WBGene00006270	3	0	0	0	1	0			WBGene00044527	579.561	564.033	172.894	161.152	165.436	118.479		WBGene00001736	0	12.3456	54.195	4.05131	251.574	312.265		WBGene00020699
WBGene00006267	0	1	1	0	1	0		WBGene00006267	0	0	0	0	1	0		WBGene00006267	0	3	0	0	1	0		WBGene00006267	2	0	0	0	1	0			WBGene00021080	6.9947	7.71139	25.6639	24.0014	38.4528	51.5519		WBGene00020696	3993.36	4618.81	8476.81	9293.7	18660.7	16430.9		WBGene00020700
WBGene00006265	0	3	0	0	0	0		WBGene00006265	1	0	0	0	0	0		WBGene00006265	0	5	0	0	0	0		WBGene00006265	1	0	0	0	0	0			WBGene00021079	234.822	142.11	140.476	205.726	139.503	114.861		WBGene00004422	32394	25360.3	13165.9	28906.9	28392.1	23818		WBGene00019097
WBGene00019348	31	53	6	13	24	22		WBGene00019348	5	18	53	13	24	22		WBGene00019348	32	69	1	13	24	22		WBGene00019348	109	32	0	13	24	22			WBGene00021078	260.802	567.338	3995.47	1818.62	3015.41	2511.57		WBGene00020695	385.683	706.788	571.404	880.754	1006.3	953.963		WBGene00019100
WBGene00006248	1	6	0	2	0	0		WBGene00006248	0	1	3	2	0	0		WBGene00006248	1	0	1	2	0	0		WBGene00006248	1	1	0	2	0	0			WBGene00003025	238.819	438.447	3090.48	1234.36	1970.93	1934.55		WBGene00023145	23.8919	23.1481	51.8387	12.1539	35.7887	47.2153		WBGene00019101
WBGene00019349	3	1	0	0	0	0		WBGene00019349	0	0	0	0	0	0		WBGene00019349	0	1	0	0	0	0		WBGene00019349	0	1	0	0	0	0			WBGene00020854	220.833	329.386	848.261	878.451	862.057	1219.16		WBGene00044705	26.1673	10.0308	12.9597	17.8257	12.6313	7.51152		WBGene00000062
WBGene00019350	1	7	0	1	2	10		WBGene00019350	3	12	7	1	2	10		WBGene00019350	7	2	1	1	2	10		WBGene00019350	8	11	0	1	2	10			WBGene00020855	31.9758	68.3009	64.8352	19.2011	80.4825	222.487		WBGene00020697	60.2986	24.6913	47.1261	17.8257	11.5787	9.65767		WBGene00044527
WBGene00018707	4	21	8	30	20	45		WBGene00018707	11	37	49	30	20	45		WBGene00018707	14	21	17	30	20	45		WBGene00018707	168	20	24	30	20	45			WBGene00003479	108.917	163.041	1249.43	432.711	518.665	449.496		WBGene00020698	43.2329	32.4073	77.7581	37.272	22.1048	20.3884		WBGene00021080
WBGene00198331	0	0	0	0	0	0		WBGene00198331	0	0	0	0	0	0		WBGene00198331	0	0	0	0	0	0		WBGene00198331	0	0	0	0	0	0			WBGene00021482	412.687	551.915	530.838	821.533	695.727	855.581		WBGene00020699	47.7838	60.9566	97.7867	189.601	23.1574	50.4345		WBGene00021079
WBGene00018708	20	55	22	18	96	97		WBGene00018708	16	69	16	18	96	97		WBGene00018708	87	41	17	18	96	97		WBGene00018708	120	16	4	18	96	97			WBGene00000498	526.601	387.773	2411.06	1407.85	1183.99	1063.6		WBGene00020700	893.102	354.165	4901.12	9577.29	332.625	2845.79		WBGene00021078
WBGene00018706	111	231	30	157	320	458		WBGene00018706	27	134	345	157	320	458		WBGene00018706	152	183	12	157	320	458		WBGene00018706	577	108	11	157	320	458			WBGene00019961	19.9849	40.7602	113.462	45.9455	45.6068	66.927		WBGene00019097	2973.97	2528.54	1809.64	2397.56	3130.46	3206.35		WBGene00003025
WBGene00018709	0	0	0	0	2	0		WBGene00018709	16	2	0	0	2	0		WBGene00018709	4	6	4	0	2	0		WBGene00018709	9	13	0	0	2	0			WBGene00019963	1942.53	5134.68	4479.03	1854.28	4204.77	6633.92		WBGene00019100	125.148	138.888	209.711	115.057	135.787	172.765		WBGene00020854
WBGene00197355	0	0	0	0	0	0		WBGene00197355	0	0	0	0	0	0		WBGene00197355	0	0	0	0	0	0		WBGene00197355	0	0	0	0	0	0			WBGene00019962	197.85	256.679	669.964	344.249	360.383	624.954		WBGene00019101	50.0592	33.9505	16.4941	9.72313	5.26305	7.51152		WBGene00020855
WBGene00199430	0	0	0	0	0	0		WBGene00199430	0	0	0	0	0	0		WBGene00199430	0	0	0	0	0	0		WBGene00199430	0	0	0	0	0	0			WBGene00019965	100.924	83.7236	1325.07	274.987	380.951	376.238		WBGene00000062	4.55084	6.94442	42.4135	9.72313	18.947	17.1692		WBGene00003479
WBGene00000387	28	20	503	247	188	158		WBGene00000387	51	125	68	247	188	158		WBGene00000387	14	21	465	247	188	158		WBGene00000387	245	82	216	247	188	158			WBGene00019970	18.9856	22.0325	110.76	355.906	83.1653	247.811		WBGene00044527	928.371	587.189	248.59	190.411	194.733	140.573		WBGene00021482
WBGene00017509	7	1	5	20	2	3		WBGene00017509	3	2	4	20	2	3		WBGene00017509	0	2	2	20	2	3		WBGene00017509	5	0	0	20	2	3			WBGene00019967	266.798	137.703	172.894	111.778	120.724	126.619		WBGene00021081	23.8919	15.432	21.2068	13.7744	4.21044	3.21922		WBGene00000498
WBGene00017508	26	27	2	21	10	24		WBGene00017508	29	29	21	21	10	24		WBGene00017508	38	41	7	21	10	24		WBGene00017508	22	19	5	21	10	24			WBGene00019968	45.9652	15.4228	17.5595	13.7151	10.731	12.6619		WBGene00021080	30.7181	24.6913	41.2353	28.3591	45.2622	61.1652		WBGene00019961
WBGene00017507	24	38	5	81	50	63		WBGene00017507	36	41	52	81	50	63		WBGene00017507	14	33	24	81	50	63		WBGene00017507	65	33	5	81	50	63			WBGene00019180	31.9758	68.3009	98.6035	83.662	140.397	147.42		WBGene00021079	695.14	290.122	334.595	243.078	164.207	136.28		WBGene00019963
WBGene00017506	2320	1506	2595	5045	3104	1979		WBGene00017506	1566	4841	1153	5045	3104	1979		WBGene00017506	1074	1012	594	5045	3104	1979		WBGene00017506	2990	1755	1021	5045	3104	1979			WBGene00019177	0.999243	8.81301	1.35073	20.5726	16.9908	20.8016		WBGene00021078	567.717	939.04	1389.04	2148.81	3549.4	2979.93		WBGene00019962
WBGene00017505	2	2	0	0	0	0		WBGene00017505	2	6	0	0	0	0		WBGene00017505	3	0	0	0	0	0		WBGene00017505	0	2	0	0	0	0			WBGene00018543	21.9833	16.5244	14.8581	10.2863	6.25975	24.4193		WBGene00003025	671.248	1067.9	973.154	1458.47	2319.95	2295.31		WBGene00019965
WBGene00017504	166	173	37	63	57	49		WBGene00017504	200	128	110	63	57	49		WBGene00017504	168	179	45	63	57	49		WBGene00017504	64	209	22	63	57	49			WBGene00018540	253.808	355.825	54.0293	139.894	93.002	126.619		WBGene00020854	270.775	352.622	1186.4	1037.94	1014.72	1446.5		WBGene00019970
WBGene00167824	0	0	0	0	0	0		WBGene00167824	0	0	0	0	0	0		WBGene00167824	0	0	0	0	0	0		WBGene00167824	0	0	0	0	0	0			WBGene00015901	17.9864	7.71139	9.45513	8.22905	10.731	14.4707		WBGene00020855	4.55084	30.8641	270.975	22.6873	94.7349	263.976		WBGene00019967
WBGene00017510	33	27	1	22	8	33		WBGene00017510	25	27	29	22	8	33		WBGene00017510	15	31	5	22	8	33		WBGene00017510	21	29	6	22	8	33			WBGene00015906	14.9886	27.5407	0	10.2863	31.2988	20.8016		WBGene00003479	228.68	317.9	318.101	511.275	610.514	533.318		WBGene00019968
WBGene00017503	148	123	18	120	112	90		WBGene00017503	109	182	117	120	112	90		WBGene00017503	138	175	51	120	112	90		WBGene00017503	124	135	30	120	112	90			WBGene00015903	30.9765	17.626	262.042	106.292	26.8275	14.4707		WBGene00021482	737.236	704.473	1496.25	970.693	818.931	1015.13		WBGene00019180
WBGene00017511	1	0	0	2	0	2		WBGene00017511	3	0	5	2	0	2		WBGene00017511	1	2	0	2	0	2		WBGene00017511	3	4	0	2	0	2			WBGene00015905	371.718	107.959	220.17	124.122	47.3953	20.8016		WBGene00000498	1001.18	1292.43	876.546	1663.47	1393.66	1261.94		WBGene00019177
WBGene00017512	47	25	11	59	34	34		WBGene00017512	51	42	13	59	34	34		WBGene00017512	31	57	22	59	34	34		WBGene00017512	37	56	5	59	34	34			WBGene00015899	398.698	79.3171	722.642	278.416	64.386	31.6547		WBGene00019961	11.3771	51.6973	40.0572	54.2875	53.6831	79.4075		WBGene00018543
WBGene00003707	168	105	27	252	100	82		WBGene00003707	199	179	234	252	100	82		WBGene00003707	146	232	88	252	100	82		WBGene00003707	119	200	12	252	100	82			WBGene00015897	49.9621	50.6748	16.2088	39.088	40.2413	50.6475		WBGene00019963	1451.72	3588.72	5637.46	2190.95	4949.37	7871		WBGene00018540
WBGene00003700	216	166	38	219	76	70		WBGene00003700	316	248	186	219	76	70		WBGene00003700	203	301	82	219	76	70		WBGene00003700	117	340	28	219	76	70			WBGene00019473	147.888	240.155	52.6786	22.6299	110.887	179.979		WBGene00019962	409.575	441.356	315.745	406.751	424.202	741.494		WBGene00015901
WBGene00021610	44	16	17	15	11	7		WBGene00021610	38	54	18	15	11	7		WBGene00021610	28	19	16	15	11	7		WBGene00021610	37	37	9	15	11	7			WBGene00019472	17.9864	16.5244	1.35073	23.3156	15.2023	22.6105		WBGene00019965	250.296	195.215	312.211	324.915	448.412	446.399		WBGene00015906
WBGene00021611	123	126	14	37	29	34		WBGene00021611	164	97	61	37	29	34		WBGene00021611	88	125	18	37	29	34		WBGene00021611	31	149	18	37	29	34			WBGene00020386	43.9667	139.907	12.1566	80.2332	104.627	83.2066		WBGene00019970	53.4723	21.6049	61.2639	420.526	97.8927	294.022		WBGene00015903
WBGene00021612	0	0	0	0	0	0		WBGene00021612	0	0	0	0	0	0		WBGene00021612	0	0	0	0	0	0		WBGene00021612	0	0	0	0	0	0			WBGene00015041	54.9584	24.2358	20.261	28.1159	23.2505	28.9414		WBGene00019967	227.542	225.308	230.918	132.073	142.102	150.23		WBGene00015905
WBGene00198427	0	0	0	0	0	0		WBGene00198427	0	0	0	0	0	0		WBGene00198427	0	0	0	0	0	0		WBGene00198427	0	0	0	0	0	0			WBGene00015043	179.864	84.8253	224.222	168.696	104.627	62.4049		WBGene00019968	3.41313	20.0617	38.879	16.2052	12.6313	15.023		WBGene00015899
WBGene00021609	0	0	0	0	1	0		WBGene00021609	0	3	0	0	1	0		WBGene00021609	0	0	1	0	1	0		WBGene00021609	2	1	0	0	1	0			WBGene00015044	448.66	685.212	85.0962	501.972	146.657	312.929		WBGene00019180	21.6165	58.6418	177.901	98.8519	165.26	174.911		WBGene00015897
WBGene00006253	0	0	0	2	0	0		WBGene00006253	0	0	0	2	0	0		WBGene00006253	0	0	0	2	0	0		WBGene00006253	0	0	0	2	0	0			WBGene00015045	12.9902	15.4228	8.1044	19.2011	7.154	4.5221		WBGene00019177	3.41313	7.71602	23.5631	24.3078	19.9996	24.6807		WBGene00019473
WBGene00006252	0	0	0	0	0	0		WBGene00006252	0	0	0	0	0	0		WBGene00006252	0	0	0	0	0	0		WBGene00006252	0	0	0	0	0	0			WBGene00015046	313.762	363.537	78.3425	21.9441	99.2618	123.905		WBGene00018543	59.1609	38.5801	10.6034	12.1539	7.36827	28.973		WBGene00019472
WBGene00021608	14	32	11	124	140	104		WBGene00021608	25	53	40	124	140	104		WBGene00021608	13	16	6	124	140	104		WBGene00021608	61	18	4	124	140	104			WBGene00003769	644.512	699.533	90.4991	264.701	221.774	374.43		WBGene00018540	320.834	141.975	338.13	165.293	109.471	150.23		WBGene00020386
WBGene00000108	0	0	1	0	0	1		WBGene00000108	0	0	0	0	0	1		WBGene00000108	0	0	0	0	0	1		WBGene00000108	0	0	0	0	0	1			WBGene00003768	209.841	361.334	22.9625	21.9441	110.887	134.758		WBGene00015901	5.68855	10.8024	20.0286	9.72313	12.6313	17.1692		WBGene00015041
WBGene00019393	1	0	1	7	1	0		WBGene00019393	5	1	0	7	1	0		WBGene00019393	6	3	0	7	1	0		WBGene00019393	1	1	0	7	1	0			WBGene00003767	251.809	115.671	64.8352	59.6606	50.9723	47.9342		WBGene00015906	0	12.3456	29.4538	12.1539	36.8414	24.6807		WBGene00015043
WBGene00019392	0	0	0	0	0	3		WBGene00019392	2	1	2	0	0	3		WBGene00019392	5	7	0	0	0	3		WBGene00019392	3	4	0	0	0	3			WBGene00003766	428.675	61.6911	113.462	322.304	135.926	38.89		WBGene00015903	85.3282	84.1046	0	125.59	31.5783	17.1692		WBGene00015044
WBGene00019391	21	27	3	10	7	10		WBGene00019391	13	12	26	10	7	10		WBGene00019391	29	35	4	10	7	10		WBGene00019391	18	23	0	10	7	10			WBGene00003765	1694.72	529.882	714.538	525.973	388.999	189.024		WBGene00015905	821.426	273.147	12.9597	146.657	55.7883	24.6807		WBGene00015045
WBGene00019384	10	7	1	20	42	26		WBGene00019384	6	11	13	20	42	26		WBGene00019384	8	10	1	20	42	26		WBGene00019384	83	4	1	20	42	26			WBGene00019568	23.9818	56.183	14.8581	61.0321	48.2895	40.6989		WBGene00015899	959.089	388.116	16.4941	328.966	75.7879	37.5576		WBGene00015046
WBGene00019390	1	1	0	0	5	0		WBGene00019390	1	1	0	0	5	0		WBGene00019390	2	1	2	0	5	0		WBGene00019390	3	3	0	0	5	0			WBGene00019569	11.9909	3.30488	28.3654	40.4595	26.8275	25.3237		WBGene00015897	72.8134	43.2097	91.8959	46.1849	47.3675	60.0922		WBGene00003769
WBGene00019389	0	6	0	0	3	11		WBGene00019389	3	0	5	0	3	11		WBGene00019389	0	1	0	0	3	11		WBGene00019389	1	4	0	0	3	11			WBGene00019565	171.87	279.813	129.67	49.3743	270.958	393.422		WBGene00005959	13.6525	11.574	4.71261	9.72313	11.5787	8.58459		WBGene00003768
WBGene00019388	302	85	71	148	71	28		WBGene00019388	252	234	43	148	71	28		WBGene00019388	123	119	17	148	71	28		WBGene00019388	47	294	7	148	71	28			WBGene00019564	45.9652	94.7399	21.6117	10.2863	15.2023	21.7061		WBGene00019473	83.0528	103.395	48.3043	26.7386	130.524	213.542		WBGene00003767
WBGene00019387	2	0	0	0	0	0		WBGene00019387	0	2	0	0	0	0		WBGene00019387	0	0	1	0	0	0		WBGene00019387	0	0	0	0	0	0			WBGene00016786	43.9667	55.0813	44.5742	7.5433	66.1745	69.6403		WBGene00019472	19.3411	16.2036	84.827	27.5489	17.8944	26.8269		WBGene00003766
WBGene00019386	0	5	0	1	0	0		WBGene00019386	0	5	3	1	0	0		WBGene00019386	6	3	1	1	0	0		WBGene00019386	3	0	0	1	0	0			WBGene00077593	53.9591	53.9797	12.1566	6.17179	6.25975	20.8016		WBGene00020386	59.1609	58.6418	196.752	94.8006	123.155	98.7228		WBGene00003765
WBGene00019385	1	0	0	0	0	0		WBGene00019385	0	0	0	0	0	0		WBGene00019385	1	1	1	0	0	0		WBGene00019385	0	0	0	0	0	0			WBGene00016788	287.782	317.268	75.6411	45.2598	62.5975	140.185		WBGene00015041	60.2986	36.2653	61.2639	33.2207	27.3679	34.3384		WBGene00019568
WBGene00005843	1	1	0	0	0	0		WBGene00005843	2	1	1	0	0	0		WBGene00005843	0	0	0	0	0	0		WBGene00005843	4	2	0	0	0	0			WBGene00016783	25.9803	42.9634	2.70147	11.6578	15.2023	10.853		WBGene00015043	212.752	257.715	115.459	199.324	123.155	74.0421		WBGene00019569
WBGene00005845	3	0	0	1	1	5		WBGene00005845	0	6	0	1	1	5		WBGene00005845	2	0	0	1	1	5		WBGene00005845	0	4	0	1	1	5			WBGene00016782	25.9803	45.1667	159.387	222.184	93.8963	189.928		WBGene00015044	956.813	405.091	1908.61	593.111	172.628	371.284		WBGene00019565
WBGene00005838	0	2	0	0	0	0		WBGene00005838	1	0	0	0	0	0		WBGene00005838	0	4	0	0	0	0		WBGene00005838	0	2	0	0	0	0			WBGene00016781	558.577	1070.78	2223.31	2348.71	2279.44	2525.14		WBGene00015045	22.7542	14.6604	127.241	22.6873	8.42088	5.36537		WBGene00019564
WBGene00005229	1	3	0	0	0	0		WBGene00005229	0	1	0	0	0	0		WBGene00005229	0	0	0	0	0	0		WBGene00005229	1	1	0	0	0	0			WBGene00017035	21.9833	68.3009	10.8059	111.778	95.6848	116.67		WBGene00015046	15.9279	58.6418	127.241	25.9284	116.84	147.011		WBGene00016786
WBGene00005231	0	2	0	0	0	0		WBGene00005231	0	0	1	0	0	0		WBGene00005231	0	1	0	0	0	0		WBGene00005231	1	0	0	0	0	0			WBGene00268212	83.9364	41.8618	17.5595	6.85754	17.885	24.4193		WBGene00003769	287.84	178.24	610.283	312.761	261.047	444.253		WBGene00077593
WBGene00021604	0	0	0	0	0	0		WBGene00021604	2	0	1	0	0	0		WBGene00021604	0	0	0	0	0	0		WBGene00021604	0	0	0	0	0	0			WBGene00018189	32.975	61.6911	86.4469	39.088	29.5103	42.5077		WBGene00003768	25.0296	78.7034	122.528	25.9284	130.524	159.888		WBGene00016788
WBGene00195035	0	0	0	0	0	0		WBGene00195035	0	0	0	0	0	0		WBGene00195035	0	0	0	0	0	0		WBGene00195035	0	0	0	0	0	0			WBGene00194894	188.857	232.443	37.8205	72.0042	78.694	47.9342		WBGene00003767	62.574	60.185	40.0572	70.4927	59.9988	56.8729		WBGene00016783
WBGene00021605	2	1	13	25	8	1		WBGene00021605	3	12	0	25	8	1		WBGene00021605	0	0	13	25	8	1		WBGene00021605	0	0	9	25	8	1			WBGene00020239	24.9811	77.1139	54.0293	128.236	293.314	150.134		WBGene00003766	682.625	331.017	98.9648	380.823	159.997	46.1422		WBGene00016782
WBGene00021607	3	3	25	37	6	4		WBGene00021607	9	5	1	37	6	4		WBGene00021607	2	3	24	37	6	4		WBGene00021607	7	7	17	37	6	4			WBGene00020240	17.9864	67.1992	37.8205	109.035	240.553	110.339		WBGene00003765	1920.45	1011.57	336.952	621.47	457.885	224.273		WBGene00016781
WBGene00167741	0	0	0	0	0	0		WBGene00167741	0	0	0	0	0	0		WBGene00167741	0	1	0	0	0	0		WBGene00167741	0	1	0	0	0	0			WBGene00020241	18.9856	41.8618	14.8581	119.321	232.505	158.273		WBGene00019568	20.4788	54.7838	54.195	72.1132	56.8409	48.2883		WBGene00017035
WBGene00021606	69	58	34	126	66	87		WBGene00021606	165	162	93	126	66	87		WBGene00021606	78	99	39	126	66	87		WBGene00021606	74	119	18	126	66	87			WBGene00020242	24.9811	22.0325	10.8059	139.208	45.6068	101.295		WBGene00019569	22.7542	19.2901	5.89076	47.8054	31.5783	30.0461		WBGene00268212
WBGene00005837	0	0	0	1	0	0		WBGene00005837	0	0	0	1	0	0		WBGene00005837	0	0	0	1	0	0		WBGene00005837	2	1	0	1	0	0			WBGene00020243	1.99849	0	5.40293	3.42877	30.4045	28.9414		WBGene00019565	229.817	221.45	23.5631	58.3388	318.941	466.787		WBGene00018189
WBGene00005846	0	0	0	1	0	0		WBGene00005846	0	0	0	1	0	0		WBGene00005846	0	0	0	1	0	0		WBGene00005846	0	0	0	1	0	0			WBGene00020237	390.704	825.118	1080.59	1226.13	1877.93	1553.79		WBGene00019564	114.909	58.6418	58.9076	12.1539	17.8944	25.7538		WBGene00194894
WBGene00005847	0	0	0	2	0	0		WBGene00005847	0	0	2	2	0	0		WBGene00005847	0	1	0	2	0	0		WBGene00005847	0	2	0	2	0	0			WBGene00003647	105.92	112.366	81.044	102.177	77.7998	108.53		WBGene00016786	63.7117	42.4381	15.316	8.91287	77.8932	82.6267		WBGene00020239
WBGene00005850	2	0	0	0	0	0		WBGene00005850	0	4	0	0	0	0		WBGene00005850	4	0	0	0	0	0		WBGene00005850	1	5	0	0	0	0			WBGene00020236	16.9871	11.0163	1.35073	19.2011	5.3655	9.04419		WBGene00016785	26.1673	14.6604	21.2068	5.67183	3.15783	5.36537		WBGene00020240
WBGene00005849	3	0	0	1	0	4		WBGene00005849	2	1	4	1	0	4		WBGene00005849	5	7	0	1	0	4		WBGene00005849	1	0	0	1	0	4			WBGene00021554	124.905	203.801	2393.5	795.475	1096.35	888.14		WBGene00077593	62.574	39.3517	44.7698	7.29235	7.36827	24.6807		WBGene00020241
WBGene00005848	0	3	0	0	2	3		WBGene00005848	2	0	1	0	2	3		WBGene00005848	2	0	1	0	2	3		WBGene00005848	0	0	0	0	2	3			WBGene00021558	55.9576	139.907	249.886	135.779	201.206	311.12		WBGene00016788	245.745	138.888	193.217	53.4772	73.6827	166.327		WBGene00020242
WBGene00005539	1	4	0	1	2	5		WBGene00005539	0	2	5	1	2	5		WBGene00005539	2	7	0	1	2	5		WBGene00005539	3	0	0	1	2	5			WBGene00021556	371.718	268.797	270.147	146.066	224.457	226.105		WBGene00016783	48.9215	16.2036	21.2068	13.7744	17.8944	12.8769		WBGene00020243
WBGene00022806	4	0	0	0	0	0		WBGene00022806	0	0	4	0	0	0		WBGene00022806	0	4	0	0	0	0		WBGene00022806	1	4	0	0	0	0			WBGene00021559	788.403	463.785	733.448	691.24	368.431	258.664		WBGene00016782	77.3642	39.3517	146.091	262.525	110.524	225.346		WBGene00020238
WBGene00170133	0	0	0	0	0	0		WBGene00170133	0	0	0	0	0	0		WBGene00170133	0	0	0	0	0	0		WBGene00170133	0	0	0	0	0	0			WBGene00021560	274.792	263.289	702.381	541.746	392.576	463.967		WBGene00016781	1046.69	631.171	1122.78	2775.14	2683.1	2996.02		WBGene00020237
WBGene00001769	68	46	25	21	15	23		WBGene00001769	48	45	45	21	15	23		WBGene00001769	64	41	5	21	15	23		WBGene00001769	68	40	17	21	15	23			WBGene00021555	292.778	259.984	1580.36	672.039	760.113	664.748		WBGene00017035	19.3411	43.2097	75.4018	132.073	112.629	138.427		WBGene00003647
WBGene00268192	0	5	0	0	0	0		WBGene00268192	1	2	12	0	0	0		WBGene00268192	3	1	1	0	0	0		WBGene00268192	0	4	0	0	0	0			WBGene00021561	77.9409	135.5	1372.35	593.177	789.623	643.947		WBGene00268212	72.8134	34.7221	31.8101	8.10261	21.0522	28.973		WBGene00020236
WBGene00006205	0	1	0	0	1	0		WBGene00006205	1	0	2	0	1	0		WBGene00006205	0	1	0	0	1	0		WBGene00006205	0	2	0	0	1	0			WBGene00003704	98.925	121.179	855.014	236.585	492.732	921.603		WBGene00018189	25.0296	38.5801	47.1261	46.1849	34.7361	50.4345		WBGene00021554
WBGene00268193	0	0	0	5	0	0		WBGene00268193	0	0	0	5	0	0		WBGene00268193	0	0	0	5	0	0		WBGene00268193	0	0	0	5	0	0			WBGene00019276	709.462	657.671	1146.77	722.785	958.636	858.294		WBGene00194894	249.158	159.722	83.6489	85.0774	92.6297	56.8729		WBGene00021558
WBGene00022807	0	2	0	0	0	0		WBGene00022807	1	1	2	0	0	0		WBGene00022807	0	6	0	0	0	0		WBGene00022807	0	1	0	0	0	0			WBGene00019275	335.746	458.277	1388.55	984.743	916.607	922.508		WBGene00020239	18.2033	55.5554	24.7412	151.519	345.256	178.13		WBGene00021556
WBGene00200752	0	0	0	0	0	0		WBGene00200752	0	0	0	0	0	0		WBGene00200752	0	0	0	0	0	0		WBGene00200752	0	1	0	0	0	0			WBGene00019274	468.645	603.691	1246.73	883.937	935.386	934.265		WBGene00020240	9.10167	40.8949	37.7009	128.832	283.152	130.915		WBGene00021559
WBGene00022805	94	119	127	223	171	141		WBGene00022805	81	194	151	223	171	141		WBGene00022805	131	104	136	223	171	141		WBGene00022805	221	130	52	223	171	141			WBGene00003747	102.922	136.602	143.178	254.415	239.659	330.113		WBGene00020241	9.10167	23.1481	24.7412	140.985	273.679	187.788		WBGene00021560
WBGene00022808	2	2	0	6	0	0		WBGene00022808	0	2	0	6	0	0		WBGene00022808	11	3	2	6	0	0		WBGene00022808	1	3	0	6	0	0			WBGene00003751	82.9371	125.585	175.595	254.415	294.208	342.775		WBGene00020242	2.27542	24.6913	25.9194	164.483	53.6831	120.184		WBGene00021555
WBGene00005410	0	1	0	0	1	0		WBGene00005410	0	0	0	0	1	0		WBGene00005410	0	0	0	0	1	0		WBGene00005410	0	3	0	0	1	0			WBGene00235310	49.9621	47.3699	16.2088	4.80028	4.47125	7.23535		WBGene00020243	1.13771	0.771602	0	4.05131	35.7887	34.3384		WBGene00021561
WBGene00022804	1	1	0	0	0	0		WBGene00022804	0	0	0	0	0	0		WBGene00022804	3	2	0	0	0	0		WBGene00022804	3	2	0	0	0	0			WBGene00003715	41.9682	38.5569	22.9625	27.4302	45.6068	29.8458		WBGene00020237	460.772	497.683	679.794	1448.75	2210.48	1843.54		WBGene00003704
WBGene00022809	1	6	0	1	3	1		WBGene00022809	2	2	0	1	3	1		WBGene00022809	1	2	0	1	3	1		WBGene00022809	0	5	0	1	3	1			WBGene00017060	175.867	347.012	159.387	26.7444	62.5975	56.074		WBGene00003647	145.627	128.858	248.59	120.729	91.5771	128.769		WBGene00019276
WBGene00021603	39	20	101	133	134	91		WBGene00021603	19	81	22	133	134	91		WBGene00021603	25	11	153	133	134	91		WBGene00021603	70	22	38	133	134	91			WBGene00044529	58.9553	68.3009	86.4469	206.412	206.572	160.987		WBGene00020236	17.0656	6.94442	14.1378	22.6873	6.31566	10.7307		WBGene00019275
WBGene00021602	24	29	93	145	113	112		WBGene00021602	49	104	66	145	113	112		WBGene00021602	54	28	165	145	113	112		WBGene00021602	91	31	40	145	113	112			WBGene00017062	793.399	819.61	2328.66	1617.69	1672.25	1618.91		WBGene00021554	334.486	409.721	622.065	939.903	1290.5	1053.76		WBGene00019274
WBGene00000976	311	388	1899	1832	1811	1732		WBGene00000976	631	1486	679	1832	1811	1732		WBGene00000976	243	207	1664	1832	1811	1732		WBGene00000976	1904	833	954	1832	1811	1732			WBGene00017981	420.681	366.842	1029.26	863.364	707.352	758.808		WBGene00021558	70.538	114.969	322.814	160.432	236.837	369.138		WBGene00003747
WBGene00018115	16	7	13	22	18	16		WBGene00018115	9	13	23	22	18	16		WBGene00018115	3	13	10	22	18	16		WBGene00018115	20	8	1	22	18	16			WBGene00017982	6351.19	5315.35	2319.21	2579.81	3728.13	2952.02		WBGene00021556	345.864	347.993	508.962	172.586	264.205	268.269		WBGene00003751
WBGene00018112	456	151	142	289	102	52		WBGene00018112	606	408	90	289	102	52		WBGene00018112	238	199	71	289	102	52		WBGene00018112	78	466	71	289	102	52			WBGene00003159	321.756	447.26	11174.6	2284.93	2990.37	2263.76		WBGene00021559	1195.73	870.367	293.36	816.743	433.675	306.899		WBGene00235310
WBGene00018113	37	121	12	43	227	276		WBGene00018113	8	73	242	43	227	276		WBGene00018113	146	142	9	43	227	276		WBGene00018113	368	103	7	43	227	276			WBGene00017983	39.9697	49.5732	21.6117	33.602	49.1838	76.8756		WBGene00021560	486.94	442.128	352.268	640.106	462.096	550.487		WBGene00003715
WBGene00018111	145	120	12	56	84	84		WBGene00018111	30	85	83	56	84	84		WBGene00018111	150	143	3	56	84	84		WBGene00018111	68	66	2	56	84	84			WBGene00044530	248.811	670.891	24.3132	24.0014	95.6848	208.016		WBGene00021555	433.467	478.393	298.073	794.056	894.719	788.71		WBGene00017060
WBGene00165613	0	0	0	0	0	0		WBGene00165613	0	0	0	0	0	0		WBGene00165613	0	0	0	0	0	0		WBGene00165613	0	0	0	0	0	0			WBGene00017984	809.387	1542.28	9609.12	4608.95	6017.41	5775.62		WBGene00021561	189.997	316.357	431.204	700.876	929.455	764.029		WBGene00017061
WBGene00018110	1	4	0	4	0	0		WBGene00018110	5	0	0	4	0	0		WBGene00018110	0	2	0	4	0	0		WBGene00018110	2	8	0	4	0	0			WBGene00017988	156.881	262.187	2407.01	867.479	1245.69	1170.32		WBGene00003704	130.837	218.363	381.722	279.54	579.988	1093.46		WBGene00044529
WBGene00268194	2	1	0	2	0	2		WBGene00268194	0	0	1	2	0	2		WBGene00268194	3	0	0	2	0	2		WBGene00268194	0	0	0	2	0	2			WBGene00017985	239.818	144.313	1161.63	705.641	427.452	304.789		WBGene00019276	988.669	1206.01	1168.73	854.015	1128.4	1018.35		WBGene00017062
WBGene00018114	0	0	0	13	0	0		WBGene00018114	0	0	1	13	0	0		WBGene00018114	0	1	1	13	0	0		WBGene00018114	1	0	0	13	0	0			WBGene00017986	206.843	107.959	2347.57	700.841	638.495	372.621		WBGene00019275	813.462	806.324	499.537	1163.54	1078.93	1094.54		WBGene00017981
WBGene00002016	150	129	17	49	72	96		WBGene00002016	165	76	4	49	72	96		WBGene00002016	86	73	2	49	72	96		WBGene00002016	164	141	7	49	72	96			WBGene00017413	73.944	51.7765	97.2528	71.3184	71.54	40.6989		WBGene00019274	886.275	1121.91	977.867	1044.43	1101.03	1108.49		WBGene00017982
WBGene00002018	101	94	8	20	63	55		WBGene00002018	140	41	4	20	63	55		WBGene00002018	71	72	1	20	63	55		WBGene00002018	104	135	7	20	63	55			WBGene00017415	8.99318	13.2195	4.0522	13.0293	16.9908	6.33094		WBGene00003747	114.909	162.808	344.021	300.607	282.1	391.672		WBGene00003159
WBGene00021599	6	3	3	2	3	9		WBGene00021599	1	1	1	2	3	9		WBGene00021599	4	4	0	2	3	9		WBGene00021599	3	2	2	2	3	9			WBGene00001714	214.837	1000.28	112.111	148.809	1135.7	2224.87		WBGene00003751	94.4299	142.746	381.722	300.607	346.309	406.695		WBGene00017983
WBGene00021600	20	13	6	21	20	18		WBGene00021600	7	16	22	21	20	18		WBGene00021600	1	11	10	21	20	18		WBGene00021600	17	6	15	21	20	18			WBGene00021619	255.806	22.0325	217.468	135.779	56.3378	18.9928		WBGene00235310	37.5444	37.0369	14.1378	5.67183	5.26305	8.58459		WBGene00044530
WBGene00021601	7	1	2	16	3	7		WBGene00021601	13	10	21	16	3	7		WBGene00021601	9	6	0	16	3	7		WBGene00021601	8	7	0	16	3	7			WBGene00021620	21.9833	5.50813	55.3801	45.2598	13.4138	2.71326		WBGene00003715	42.0952	47.0677	57.7295	32.4104	53.6831	35.4114		WBGene00017984
WBGene00001632	599	682	1788	1779	1750	2134		WBGene00001632	869	1590	1373	1779	1750	2134		WBGene00001632	960	835	1792	1779	1750	2134		WBGene00001632	2608	935	717	1779	1750	2134			WBGene00004820	93.9288	15.4228	94.5513	24.6872	0.89425	0		WBGene00017060	92.1544	114.197	95.4304	31.6002	73.6827	66.5306		WBGene00017988
WBGene00044344	199	207	844	1127	909	837		WBGene00044344	258	815	386	1127	909	837		WBGene00044344	278	255	732	1127	909	837		WBGene00044344	880	406	427	1127	909	837			WBGene00004813	121.908	7.71139	208.013	51.4316	5.3655	0		WBGene00044529	93.2922	165.123	136.666	243.889	243.153	191.007		WBGene00017985
WBGene00021309	106	293	48	99	458	629		WBGene00021309	36	132	486	99	458	629		WBGene00021309	235	248	20	99	458	629		WBGene00021309	836	121	21	99	458	629			WBGene00021621	18.9856	3.30488	28.3654	12.3436	11.6253	9.04419		WBGene00017062	1515.43	1537.8	1200.54	1911.41	1968.38	1920.8		WBGene00017986
WBGene00020394	123	83	63	129	147	55		WBGene00020394	124	418	40	129	147	55		WBGene00020394	289	96	40	129	147	55		WBGene00020394	177	149	49	129	147	55			WBGene00021627	741.438	3051.51	1874.82	4362.08	26229.3	21839		WBGene00017981	571.13	824.843	783.472	1020.12	832.615	900.309		WBGene00017413
WBGene00020393	343	311	914	1788	1311	1382		WBGene00020393	682	1123	636	1788	1311	1382		WBGene00020393	313	421	730	1788	1311	1382		WBGene00020393	1214	515	495	1788	1311	1382			WBGene00021625	1034.22	4500.15	1943.71	2030.52	12561.5	12070.4		WBGene00017982	8742.16	4637.33	4826.89	3048.2	4388.33	3502.51		WBGene00017415
WBGene00020388	58	112	22	225	228	170		WBGene00020388	43	101	164	225	228	170		WBGene00020388	120	225	9	225	228	170		WBGene00020388	195	43	0	225	228	170			WBGene00044637	273.793	273.203	174.245	87.7765	178.85	126.619		WBGene00003159	945.436	1134.26	803.5	2699.79	3519.93	2685.9		WBGene00001714
WBGene00020396	36	90	18	16	97	166		WBGene00020396	5	36	248	16	97	166		WBGene00020396	62	86	26	16	97	166		WBGene00020396	372	33	14	16	97	166			WBGene00021626	182.861	243.46	1045.47	617.179	471.27	478.438		WBGene00017983	36.4067	30.8641	104.856	39.7028	57.8936	91.2113		WBGene00021619
WBGene00195420	4	0	0	1	3	2		WBGene00195420	1	0	4	1	3	2		WBGene00195420	2	6	0	1	3	2		WBGene00195420	5	2	0	1	3	2			WBGene00019224	50.9614	47.3699	22.9625	30.8589	36.6643	21.7061		WBGene00044530	86.4659	138.888	865.942	28.3591	112.629	246.807		WBGene00021620
WBGene00219730	0	0	0	0	0	0		WBGene00219730	0	0	0	0	0	0		WBGene00219730	0	0	0	0	0	0		WBGene00219730	0	0	0	0	0	0			WBGene00020370	106.919	120.077	22.9625	136.465	101.05	61.5005		WBGene00017984	1851.05	2874.22	2355.13	5445.77	7083.01	6852.65		WBGene00004820
WBGene00020389	2254	1684	1555	2835	2036	2154		WBGene00020389	2767	3590	1757	2835	2036	2154		WBGene00020389	1809	1764	1649	2835	2036	2154		WBGene00020389	1876	1991	689	2835	2036	2154			WBGene00020369	720.454	1267.97	4069.76	2524.95	3644.96	4042.75		WBGene00017988	307.181	562.498	467.727	1024.98	1466.29	1388.56		WBGene00004813
WBGene00020392	840	502	1348	1754	1381	1069		WBGene00020392	1047	1784	509	1754	1381	1069		WBGene00020392	448	487	1515	1754	1381	1069		WBGene00020392	928	878	671	1754	1381	1069			WBGene00006796	145.889	310.659	1308.86	799.589	1197.4	1250.81		WBGene00017985	731.547	506.943	118.993	833.759	503.148	361.626		WBGene00021621
WBGene00020390	118	139	48	104	92	128		WBGene00020390	134	171	102	104	92	128		WBGene00020390	166	145	64	104	92	128		WBGene00020390	143	132	46	104	92	128			WBGene00020904	15.9879	39.6586	12.1566	42.5168	57.232	54.2652		WBGene00017986	408.438	773.145	102.499	828.087	751.564	442.107		WBGene00021627
WBGene00195501	1	2	0	2	1	0		WBGene00195501	1	1	2	2	1	0		WBGene00195501	1	0	0	2	1	0		WBGene00195501	2	1	0	2	1	0			WBGene00004947	318.758	568.439	2558.29	1317.33	1410.23	1760		WBGene00017413	139.938	172.839	80.1144	84.2672	84.2088	48.2883		WBGene00021625
WBGene00020391	916	1889	7458	5551	7712	7180		WBGene00020391	2112	3940	2784	5551	7712	7180		WBGene00020391	2574	1895	7102	5551	7712	7180		WBGene00020391	11659	4232	4085	5551	7712	7180			WBGene00044586	35.9727	33.0488	17.5595	19.8869	21.462	27.1326		WBGene00017415	14.7902	18.5185	1.17815	15.395	19.9996	7.51152		WBGene00044637
WBGene00021305	342	604	3196	3702	4322	3481		WBGene00021305	753	1657	1560	3702	4322	3481		WBGene00021305	533	482	2413	3702	4322	3481		WBGene00021305	3366	1148	1126	3702	4322	3481			WBGene00022017	6.9947	5.50813	12.1566	21.9441	12.5195	30.7503		WBGene00001714	27.305	270.832	2599.01	175.827	1336.81	2639.76		WBGene00021626
WBGene00220139	5	2	5	3	6	5		WBGene00220139	2	17	5	3	6	5		WBGene00220139	2	6	3	3	6	5		WBGene00220139	12	6	2	3	6	5			WBGene00022018	82.9371	134.398	14.8581	25.3729	73.3285	110.339		WBGene00021619	287.84	216.049	1.17815	160.432	66.3144	22.5346		WBGene00019224
WBGene00021304	23	23	9	23	34	54		WBGene00021304	17	19	55	23	34	54		WBGene00021304	31	48	5	23	34	54		WBGene00021304	64	25	10	23	34	54			WBGene00022019	335.746	425.228	2348.93	1204.18	1247.48	1151.33		WBGene00021620	19.3411	11.574	0	53.4772	15.7892	3.21922		WBGene00020370
WBGene00021303	0	0	0	5	2	10		WBGene00021303	0	0	2	5	2	10		WBGene00021303	0	0	0	5	2	10		WBGene00021303	0	1	0	5	2	10			WBGene00022015	1029.22	1023.41	1081.94	809.19	893.356	980.391		WBGene00004820	170.656	48.6109	0	29.1694	1.05261	0		WBGene00020369
WBGene00172418	0	0	0	0	0	1		WBGene00172418	0	0	0	0	0	1		WBGene00172418	0	0	0	0	0	1		WBGene00172418	0	0	0	0	0	1			WBGene00022014	30.9765	70.5041	719.941	262.644	422.98	381.665		WBGene00004813	216.165	67.901	0	60.7696	6.31566	0		WBGene00006796
WBGene00005644	34	77	45	75	65	59		WBGene00005644	52	53	143	75	65	59		WBGene00005644	83	136	55	75	65	59		WBGene00005644	118	26	12	75	65	59			WBGene00022022	107.918	121.179	390.362	235.214	244.13	266.804		WBGene00021621	46.6461	64.043	2.35631	14.5847	13.6839	10.7307		WBGene00020904
WBGene00021302	48	87	22	64	91	77		WBGene00021302	64	85	83	64	91	77		WBGene00021302	105	106	9	64	91	77		WBGene00021302	82	79	5	64	91	77			WBGene00022021	183.861	333.793	1628.98	1207.61	1176.83	1169.41		WBGene00021627	303.768	2910.48	11343.3	5154.07	30874.1	25911.5		WBGene00004947
WBGene00044517	51	35	20	35	22	13		WBGene00044517	73	62	38	35	22	13		WBGene00044517	20	34	18	35	22	13		WBGene00044517	26	40	0	35	22	13			WBGene00018814	71.9455	105.756	1227.82	535.574	822.71	706.351		WBGene00021625	378.857	1936.72	8036.18	2399.18	14786	14321.2		WBGene00044586
WBGene00021301	20	24	8	10	11	14		WBGene00021301	27	38	24	10	11	14		WBGene00021301	24	27	8	10	11	14		WBGene00021301	4	6	2	10	11	14			WBGene00018812	188.857	278.712	5063.9	1383.17	2240.1	2012.33		WBGene00044637	262.811	328.703	207.355	103.713	210.522	150.23		WBGene00022017
WBGene00044516	1	1	1	0	0	6		WBGene00044516	7	5	2	0	0	6		WBGene00044516	8	7	0	0	0	6		WBGene00044516	2	1	1	0	0	6			WBGene00018811	1653.75	2304.6	14265.1	3135.95	5580.12	5931.18		WBGene00021626	335.624	354.937	421.779	729.235	554.726	567.656		WBGene00022018
WBGene00001785	0	0	0	0	2	0		WBGene00001785	0	0	0	0	2	0		WBGene00001785	0	2	1	0	2	0		WBGene00001785	0	0	1	0	2	0			WBGene00018813	14.9886	12.1179	59.4323	58.9749	26.8275	22.6105		WBGene00019224	38.6821	28.5493	67.1547	36.4618	43.157	25.7538		WBGene00022016
WBGene00020277	6	9	2	3	23	23		WBGene00020277	1	9	11	3	23	23		WBGene00020277	5	6	4	3	23	23		WBGene00020277	31	9	0	3	23	23			WBGene00004928	108.917	112.366	189.103	183.096	168.119	142.898		WBGene00020370	195.686	142.746	114.281	161.242	118.945	72.969		WBGene00022019
WBGene00020280	232	377	315	447	946	947		WBGene00020280	111	679	566	447	946	947		WBGene00020280	451	318	164	447	946	947		WBGene00020280	877	229	62	447	946	947			WBGene00018297	2199.33	9832.02	2039.61	4923.71	33212.5	37531.6		WBGene00020369	1480.16	2165.12	3168.05	2983.38	4290.44	4796.64		WBGene00022015
WBGene00198113	0	0	0	0	0	0		WBGene00198113	0	0	0	0	0	0		WBGene00198113	0	0	0	0	0	0		WBGene00198113	0	0	0	0	0	0			WBGene00044533	58.9553	317.268	52.6786	67.8897	315.67	414.224		WBGene00006796	276.463	432.097	816.46	944.765	1409.45	1484.06		WBGene00022014
WBGene00200219	0	0	0	0	0	0		WBGene00200219	0	0	0	0	0	0		WBGene00200219	0	0	0	0	0	0		WBGene00200219	0	0	0	0	0	0			WBGene00000712	4821.35	4274.31	58392.2	38271.9	42207.7	22730.8		WBGene00020904	28.4427	44.7529	53.0169	50.2362	67.3671	64.3845		WBGene00022022
WBGene00020279	97	87	36	81	67	76		WBGene00020279	50	118	204	81	67	76		WBGene00020279	60	104	23	81	67	76		WBGene00020279	115	78	12	81	67	76			WBGene00018296	53.9591	48.4716	21.6117	41.1453	28.616	31.6547		WBGene00004947	501.73	608.023	1179.33	1556.51	1659.97	2088.2		WBGene00022021
WBGene00005604	0	0	0	0	0	0		WBGene00005604	0	0	0	0	0	0		WBGene00005604	0	0	0	0	0	0		WBGene00005604	0	0	0	0	0	0			WBGene00219236	33.9743	72.7074	2.70147	10.9721	2.68275	6.33094		WBGene00044586	58.0232	58.6418	51.8387	23.4976	25.2626	32.1922		WBGene00018814
WBGene00200073	0	0	0	0	0	0		WBGene00200073	0	0	0	0	0	0		WBGene00200073	0	0	0	0	0	0		WBGene00200073	0	0	0	0	0	0			WBGene00019356	74.9432	76.0122	16.2088	28.1159	27.7218	41.6033		WBGene00022017	13.6525	19.2901	24.7412	25.9284	14.7365	36.4845		WBGene00018812
WBGene00023343	2	0	0	0	0	0		WBGene00023343	0	0	0	0	0	0		WBGene00023343	0	1	0	0	0	0		WBGene00023343	0	0	0	0	0	0			WBGene00019355	63.9515	47.3699	33.7683	59.6606	71.54	84.111		WBGene00022018	13.6525	40.1233	131.953	29.9797	86.314	130.915		WBGene00018811
WBGene00044518	0	0	0	0	0	0		WBGene00044518	0	0	0	0	0	0		WBGene00044518	0	0	0	0	0	0		WBGene00044518	0	0	0	0	0	0			WBGene00006392	347.736	268.797	1017.1	770.788	522.242	425.981		WBGene00022016	23.8919	17.7469	40.0572	11.3437	11.5787	4.2923		WBGene00018813
WBGene00021494	0	0	1	0	0	0		WBGene00021494	0	0	2	0	0	0		WBGene00021494	0	0	0	0	0	0		WBGene00021494	1	0	0	0	0	0			WBGene00019354	352.733	360.232	2097.69	1911.88	1347.64	1245.39		WBGene00022019	549.514	763.115	713.961	1422.82	1468.39	1366.02		WBGene00004928
WBGene00005603	0	0	1	0	0	0		WBGene00005603	0	0	0	0	0	0		WBGene00005603	0	0	0	0	0	0		WBGene00005603	0	1	0	0	0	0			WBGene00019353	419.682	343.708	1106.25	695.355	659.063	700.925		WBGene00022015	1806.68	1189.81	1619.96	956.108	1051.56	1163.21		WBGene00018297
WBGene00200592	0	0	0	0	0	0		WBGene00200592	0	0	0	0	0	0		WBGene00200592	0	0	0	0	0	0		WBGene00200592	0	0	0	0	0	0			WBGene00019357	1492.87	906.639	1660.05	2152.58	1250.16	1289.7		WBGene00022020	9.10167	11.574	8.24707	15.395	7.36827	19.3153		WBGene00044533
WBGene00020343	86	163	48	212	117	212		WBGene00020343	113	153	341	212	117	212		WBGene00020343	279	184	75	212	117	212		WBGene00020343	425	126	56	212	117	212			WBGene00022584	37.9712	24.2358	180.998	67.8897	115.358	71.4491		WBGene00022014	143.351	182.87	278.044	310.33	497.885	452.837		WBGene00000712
WBGene00020342	9	11	6	31	33	32		WBGene00020342	15	19	24	31	33	32		WBGene00020342	25	26	1	31	33	32		WBGene00020342	52	8	0	31	33	32			WBGene00018211	61.9531	213.716	17.5595	0	15.2023	28.9414		WBGene00022022	220.716	253.857	154.338	277.92	287.363	316.557		WBGene00018296
WBGene00197537	0	0	0	0	0	0		WBGene00197537	0	0	0	0	0	0		WBGene00197537	0	0	0	0	0	0		WBGene00197537	0	0	0	0	0	0			WBGene00004195	104.92	154.228	118.865	127.55	160.071	149.229		WBGene00022021	262.811	502.313	580.829	1426.87	1385.23	1387.48		WBGene00269385
WBGene00020341	82	133	71	116	153	248		WBGene00020341	59	133	439	116	153	248		WBGene00020341	125	193	51	116	153	248		WBGene00020341	369	120	45	116	153	248			WBGene00018210	574.565	660.976	143.178	167.324	174.379	272.23		WBGene00018814	200.237	271.604	245.056	632.814	968.401	838.071		WBGene00219236
WBGene00020340	463	608	1316	1972	1581	1657		WBGene00020340	548	1493	947	1972	1581	1657		WBGene00020340	882	652	1230	1972	1581	1657		WBGene00020340	1953	597	491	1972	1581	1657			WBGene00006570	93.9288	55.0813	148.581	133.036	127.878	156.465		WBGene00018812	372.031	639.658	878.902	1634.3	2636.79	2387.59		WBGene00019356
WBGene00170432	1	0	0	0	0	0		WBGene00170432	1	2	0	0	0	0		WBGene00170432	0	0	0	0	0	0		WBGene00170432	0	2	0	0	0	0			WBGene00018208	183.861	256.679	1115.71	548.603	640.283	662.939		WBGene00018811	4058.21	4054	3190.44	3705.32	6568.29	7037.22		WBGene00019355
WBGene00006589	78	133	278	698	783	806		WBGene00006589	37	147	277	698	783	806		WBGene00006589	101	100	172	698	783	806		WBGene00006589	832	79	83	698	783	806			WBGene00018207	75.9424	150.923	71.5889	112.464	163.648	132.045		WBGene00018813	36.4067	33.1789	3.53446	69.6825	31.5783	26.8269		WBGene00006392
WBGene00000111	84	92	140	1195	377	575		WBGene00000111	131	212	344	1195	377	575		WBGene00000111	119	163	391	1195	377	575		WBGene00000111	303	143	26	1195	377	575			WBGene00018206	99.9243	88.1301	252.587	104.92	100.156	140.185		WBGene00004928	229.817	166.666	163.763	216.34	197.891	169.546		WBGene00019354
WBGene00019089	7	4	3	10	27	82		WBGene00019089	5	10	3	10	27	82		WBGene00019089	10	2	1	10	27	82		WBGene00019089	25	23	2	10	27	82			WBGene00015984	10.9917	36.3537	9.45513	8.9148	8.04825	18.9928		WBGene00018297	466.461	4141.96	29306.6	5817.68	39093.9	44530.4		WBGene00019353
WBGene00019096	77	98	26	141	163	107		WBGene00019096	103	149	155	141	163	107		WBGene00019096	81	149	24	141	163	107		WBGene00019096	86	82	1	141	163	107			WBGene00001855	700.469	827.322	10660	3769.59	5038.21	3444.03		WBGene00044533	31.8559	125	549.019	80.2159	371.571	491.468		WBGene00019357
WBGene00023306	0	0	0	0	0	0		WBGene00023306	0	0	0	0	0	0		WBGene00023306	0	0	0	0	0	0		WBGene00023306	0	0	0	0	0	0			WBGene00003994	338.743	442.854	5224.64	1521.69	2220.42	1826.02		WBGene00000712	8379.23	19699	9193.13	45220.7	49682.1	26969.6		WBGene00022584
WBGene00019095	99	100	164	433	296	289		WBGene00019095	100	211	175	433	296	289		WBGene00019095	103	86	193	433	296	289		WBGene00019095	293	83	39	433	296	289			WBGene00015982	89.9318	74.9106	25.6639	23.3156	30.4045	20.8016		WBGene00018296	67.1248	52.469	32.9883	48.6157	33.6835	37.5576		WBGene00018211
WBGene00019094	32	29	5	44	28	10		WBGene00019094	79	43	57	44	28	10		WBGene00019094	29	68	22	44	28	10		WBGene00019094	8	56	5	44	28	10			WBGene00015987	124.905	123.382	114.812	235.899	162.754	111.244		WBGene00269385	18.2033	5.40122	15.316	4.86157	11.5787	8.58459		WBGene00004195
WBGene00044519	0	0	0	0	0	0		WBGene00044519	0	0	3	0	0	0		WBGene00044519	0	1	0	0	0	0		WBGene00044519	0	0	0	0	0	0			WBGene00015981	165.874	174.057	91.8499	178.296	143.08	185.406		WBGene00219236	46.6461	13.1172	15.316	12.9642	3.15783	7.51152		WBGene00018210
WBGene00019090	36	34	5	50	68	72		WBGene00019090	45	17	73	50	68	72		WBGene00019090	26	38	6	50	68	72		WBGene00019090	35	62	0	50	68	72			WBGene00015980	55.9576	24.2358	9.45513	37.7165	36.6643	26.2282		WBGene00019356	56.8855	35.4937	64.7984	33.2207	32.6309	49.3614		WBGene00006570
WBGene00268196	11	14	1	2	3	6		WBGene00268196	22	6	12	2	3	6		WBGene00268196	16	16	0	2	3	6		WBGene00268196	5	7	0	2	3	6			WBGene00019840	40.969	50.6748	28.3654	67.2039	45.6068	45.221		WBGene00019355	21.6165	42.4381	81.2925	70.4927	84.2088	99.7959		WBGene00018208
WBGene00174154	0	0	0	0	0	0		WBGene00174154	0	0	0	0	0	0		WBGene00174154	0	0	0	0	0	0		WBGene00174154	0	0	0	0	0	0			WBGene00019839	227.827	664.281	128.32	263.33	1368.2	1894.76		WBGene00006392	628.015	765.429	433.56	910.734	614.724	505.418		WBGene00018207
WBGene00019092	126	118	53	110	87	118		WBGene00019092	86	93	199	110	87	118		WBGene00019092	84	161	42	110	87	118		WBGene00019092	121	61	11	110	87	118			WBGene00019841	77.9409	82.622	637.546	181.725	284.372	269.517		WBGene00019354	742.924	1180.55	1287.72	2259.01	1586.28	1477.62		WBGene00018206
WBGene00019091	0	2	0	3	0	1		WBGene00019091	0	4	3	3	0	1		WBGene00019091	4	1	0	3	0	1		WBGene00019091	0	0	0	3	0	1			WBGene00019842	368.721	305.151	909.044	477.971	331.767	376.238		WBGene00019353	805.498	615.739	552.554	821.605	775.774	831.633		WBGene00015984
WBGene00044520	9	2	5	12	5	5		WBGene00044520	12	11	7	12	5	5		WBGene00044520	5	14	11	12	5	5		WBGene00044520	3	11	6	12	5	5			WBGene00016509	439.667	696.228	7645.15	3489.12	4615.23	4446.13		WBGene00019357	2517.75	2056.32	1643.52	2543.41	1471.55	1530.2		WBGene00001855
WBGene00001857	0	1	5	6	6	1		WBGene00001857	2	3	2	6	6	1		WBGene00001857	0	4	1	6	6	1		WBGene00001857	1	0	1	6	6	1			WBGene00002010	1388.95	2674.75	22050.7	7371.86	11809.5	10995.9		WBGene00022584	65.9871	81.7898	27.0975	80.2159	135.787	84.7729		WBGene00003994
WBGene00021488	0	0	0	0	0	0		WBGene00021488	0	0	0	0	0	0		WBGene00021488	0	0	0	0	0	0		WBGene00021488	0	0	0	0	0	0			WBGene00201966	14.9886	9.91464	20.261	6.85754	7.154	11.7575		WBGene00018211	5.68855	19.2901	11.7815	0	17.8944	34.3384		WBGene00015982
WBGene00021489	12	40	11	50	66	45		WBGene00021489	3	40	32	50	66	45		WBGene00021489	48	21	5	50	66	45		WBGene00021489	28	4	0	50	66	45			WBGene00016508	1227.07	1250.35	1533.08	1363.97	1157.16	1159.47		WBGene00004195	144.489	148.148	148.447	150.709	188.417	177.057		WBGene00015987
WBGene00021490	4	11	0	1	1	6		WBGene00021490	3	3	7	1	1	6		WBGene00021490	8	9	0	1	1	6		WBGene00021490	11	2	1	1	1	6			WBGene00045308	23.9818	60.5895	70.2381	61.7179	110.887	115.766		WBGene00018210	565.441	415.894	594.967	197.704	205.259	322.995		WBGene00015981
WBGene00021491	259	88	132	34	12	65		WBGene00021491	8	6	470	34	12	65		WBGene00021491	1	113	9	34	12	65		WBGene00021491	9	5	16	34	12	65			WBGene00003528	268.796	136.602	601.076	815.362	449.808	243.289		WBGene00006570	72.8134	102.623	89.5396	157.191	150.523	185.642		WBGene00015980
WBGene00198913	0	0	0	1	0	0		WBGene00198913	0	0	0	1	0	0		WBGene00198913	0	0	0	1	0	0		WBGene00198913	0	0	0	1	0	0			WBGene00016507	317.759	318.37	171.543	266.758	245.025	218.869		WBGene00018208	294.667	489.967	320.458	648.209	753.669	786.563		WBGene00019840
WBGene00268197	0	0	0	1	0	0		WBGene00268197	0	0	0	1	0	0		WBGene00268197	0	0	0	1	0	0		WBGene00268197	0	0	0	1	0	0			WBGene00016506	35.9727	59.4878	28.3654	70.6327	37.5585	73.258		WBGene00018207	94.4299	98.7651	129.597	132.883	192.628	156.669		WBGene00019839
WBGene00021492	16	24	5	13	14	26		WBGene00021492	23	19	30	13	14	26		WBGene00021492	8	7	11	13	14	26		WBGene00021492	36	8	11	13	14	26			WBGene00003591	9.99243	24.2358	18.9103	27.4302	36.6643	30.7503		WBGene00018206	109.22	94.9071	78.9362	123.97	117.892	166.327		WBGene00019841
WBGene00021487	332	348	270	163	315	369		WBGene00021487	454	723	364	163	315	369		WBGene00021487	292	302	210	163	315	369		WBGene00021487	673	298	197	163	315	369			WBGene00016511	134.898	248.968	622.688	339.448	532.079	623.145		WBGene00015984	18.2033	27.7777	21.2068	10.5334	9.47349	22.5346		WBGene00019842
WBGene00003676	353	353	909	927	732	741		WBGene00003676	631	908	522	927	732	741		WBGene00003676	412	437	1035	927	732	741		WBGene00003676	813	606	378	927	732	741			WBGene00005110	5.99546	15.4228	4.0522	11.6578	9.83675	21.7061		WBGene00001855	2207.16	3074.83	1164.02	4454.01	5930.41	4086.27		WBGene00016509
WBGene00021486	5825	2780	5270	10046	6953	5539		WBGene00021486	7299	11067	4172	10046	6953	5539		WBGene00021486	2994	4033	7294	10046	6953	5539		WBGene00021486	4288	4541	2977	10046	6953	5539			WBGene00020590	14.9886	46.2683	5.40293	52.1173	91.2135	135.663		WBGene00003994	732.685	1056.32	817.638	1797.97	2613.63	2166.54		WBGene00002010
WBGene00021493	204	102	98	288	134	129		WBGene00021493	156	228	288	288	134	129		WBGene00021493	218	236	107	288	134	129		WBGene00021493	157	158	49	288	134	129			WBGene00020591	40.969	51.7765	12.1566	4.11453	8.04825	7.23535		WBGene00015982	69.4003	62.4998	34.1664	27.5489	35.7887	24.6807		WBGene00201966
WBGene00018094	2	1	10	10	3	1		WBGene00018094	5	12	1	10	3	1		WBGene00018094	0	0	23	10	3	1		WBGene00018094	1	1	4	10	3	1			WBGene00020589	361.726	402.094	117.514	98.0628	93.8963	135.663		WBGene00015987	183.171	229.937	101.321	278.73	191.575	131.988		WBGene00016508
WBGene00018099	58	79	552	450	320	208		WBGene00018099	119	203	88	450	320	208		WBGene00018099	57	66	572	450	320	208		WBGene00018099	245	172	226	450	320	208			WBGene00020592	2750.92	3420.55	1903.18	298.303	718.977	484.769		WBGene00015981	220.716	145.833	237.987	210.668	168.418	219.98		WBGene00045308
WBGene00018093	1	2	0	1	0	2		WBGene00018093	2	0	3	1	0	2		WBGene00018093	0	3	0	1	0	2		WBGene00018093	3	0	0	1	0	2			WBGene00020588	829.371	931.976	7949.07	4139.21	3889.1	3016.24		WBGene00015980	30.7181	38.5801	95.4304	44.5644	43.157	31.1192		WBGene00003528
WBGene00018096	2	0	0	14	4	12		WBGene00018096	5	2	0	14	4	12		WBGene00018096	2	3	5	14	4	12		WBGene00018096	1	2	4	14	4	12			WBGene00020593	52.9599	34.1504	66.1859	90.5196	53.655	30.7503		WBGene00022013	2.27542	6.94442	49.4824	0	5.26305	6.43845		WBGene00016507
WBGene00018097	3	8	2	24	2	13		WBGene00018097	4	7	16	24	2	13		WBGene00018097	9	21	2	24	2	13		WBGene00018097	5	6	0	24	2	13			WBGene00020587	11.9909	22.0325	49.9771	9.60056	17.885	29.8458		WBGene00019840	28.4427	25.4629	97.7867	79.4056	53.6831	53.6537		WBGene00016506
WBGene00018098	95	81	21	120	159	108		WBGene00018098	50	123	193	120	159	108		WBGene00018098	91	119	8	120	159	108		WBGene00018098	98	42	7	120	159	108			WBGene00019234	552.581	495.732	82.3947	125.493	133.243	275.848		WBGene00019839	25.0296	303.24	1153.41	311.14	1610.49	2248.09		WBGene00003591
WBGene00018092	3	1	0	3	0	1		WBGene00018092	2	1	10	3	0	1		WBGene00018092	3	4	0	3	0	1		WBGene00018092	2	0	0	3	0	1			WBGene00019233	36.972	56.183	44.5742	4.11453	8.04825	5.42652		WBGene00019841	83.0528	206.018	175.545	214.719	334.73	319.776		WBGene00016511
WBGene00017722	3	4	2	12	5	2		WBGene00017722	19	14	0	12	5	2		WBGene00017722	5	4	2	12	5	2		WBGene00017722	3	10	2	12	5	2			WBGene00019232	196.851	160.838	425.481	120.693	152.023	106.721		WBGene00019842	606.399	530.091	302.785	564.752	390.518	446.399		WBGene00005110
WBGene00199577	0	0	0	0	0	0		WBGene00199577	0	0	0	0	0	0		WBGene00199577	0	0	0	0	0	0		WBGene00199577	0	0	0	0	0	0			WBGene00019236	2149.37	4687.42	152.633	163.209	1667.78	2131.72		WBGene00016509	962.502	1705.24	2979.55	4122.61	5432.52	5275.23		WBGene00020590
WBGene00200886	0	0	0	0	0	0		WBGene00200886	0	0	0	0	0	0		WBGene00200886	0	0	0	0	0	0		WBGene00200886	0	0	0	0	0	0			WBGene00015340	485.632	840.541	145.879	447.112	3752.27	3971.31		WBGene00002010	2878.4	3815.57	4452.24	8710.31	13900.8	13046.4		WBGene00020591
WBGene00000514	56	83	132	149	173	230		WBGene00000514	58	192	148	149	173	230		WBGene00000514	72	63	87	149	173	230		WBGene00000514	303	42	50	149	173	230			WBGene00015339	326.752	1151.2	251.236	361.392	5389.65	6496.44		WBGene00201966	23.8919	20.8333	27.0975	8.10261	8.42088	13.95		WBGene00020589
WBGene00017721	2	13	2	3	7	8		WBGene00017721	11	11	8	3	7	8		WBGene00017721	27	13	2	3	7	8		WBGene00017721	18	6	0	3	7	8			WBGene00006523	280.787	425.228	3895.52	1713.01	2013.85	2014.14		WBGene00016508	1377.77	1580.24	1113.35	1611.61	1362.08	1375.68		WBGene00020592
WBGene00017723	0	0	0	0	0	0		WBGene00017723	1	0	0	0	0	0		WBGene00017723	0	0	0	0	0	0		WBGene00017723	0	0	0	0	0	0			WBGene00017843	26.9796	15.4228	590.27	154.98	52.7608	5.42652		WBGene00045308	38.6821	77.1602	74.2236	72.9235	130.524	137.353		WBGene00020588
WBGene00235326	10	3	0	2	9	4		WBGene00235326	3	5	9	2	9	4		WBGene00235326	5	11	0	2	9	4		WBGene00235326	2	2	0	2	9	4			WBGene00003573	11.9909	28.6423	28.3654	30.1732	24.1448	40.6989		WBGene00003528	325.385	505.399	445.342	963.401	529.463	288.657		WBGene00020593
WBGene00194908	616	272	271	78	163	159		WBGene00194908	493	646	187	78	163	159		WBGene00194908	185	433	126	78	163	159		WBGene00194908	294	732	153	78	163	159			WBGene00015739	207.842	213.716	120.215	56.9176	84.9538	47.0298		WBGene00016507	547.238	368.826	368.762	315.192	288.415	259.684		WBGene00020587
WBGene00017720	18	18	24	26	19	30		WBGene00017720	37	36	22	26	19	30		WBGene00017720	31	26	19	26	19	30		WBGene00017720	55	18	16	26	19	30			WBGene00005657	16.9871	11.0163	8.1044	30.8589	16.0965	26.2282		WBGene00016506	65.9871	77.9318	97.7867	83.4569	44.2096	86.919		WBGene00019234
WBGene00017719	868	1117	6521	2702	3744	3950		WBGene00017719	2680	3454	1383	2702	3744	3950		WBGene00017719	808	739	4256	2702	3744	3950		WBGene00017719	5762	3230	3250	2702	3744	3950			WBGene00005655	52.9599	60.5895	85.0962	129.608	172.59	245.098		WBGene00003591	7.96396	8.48762	43.5917	32.4104	43.157	36.4845		WBGene00019233
WBGene00017724	92	165	312	796	874	763		WBGene00017724	195	339	514	796	874	763		WBGene00017724	166	199	393	796	874	763		WBGene00017724	517	221	122	796	874	763			WBGene00019644	219.833	583.862	201.259	295.56	590.205	794.985		WBGene00016511	193.411	229.166	415.888	401.079	626.303	739.348		WBGene00019232
WBGene00268198	0	0	0	0	0	0		WBGene00268198	0	0	0	0	0	0		WBGene00268198	0	0	0	0	0	0		WBGene00268198	0	0	0	0	0	0			WBGene00019645	523.603	622.419	1026.56	771.473	1361.94	1249.91		WBGene00005110	13.6525	23.1481	16.4941	13.7744	11.5787	25.7538		WBGene00019236
WBGene00006117	0	0	0	0	0	0		WBGene00006117	0	0	0	0	0	0		WBGene00006117	0	0	0	0	0	0		WBGene00006117	0	0	0	0	0	0			WBGene00044535	405.693	56.183	1017.1	460.827	137.715	51.5519		WBGene00020590	18.2033	6.17282	64.7984	61.5798	107.366	160.961		WBGene00044534
WBGene00016693	8	0	0	11	1	1		WBGene00016693	21	4	4	11	1	1		WBGene00016693	0	3	5	11	1	1		WBGene00016693	1	10	0	11	1	1			WBGene00019647	1697.71	2214.27	466.003	256.472	405.095	397.04		WBGene00020591	30.7181	30.0925	35.3446	4.86157	9.47349	8.58459		WBGene00015340
WBGene00268199	1	0	0	8	1	1		WBGene00268199	2	0	0	8	1	1		WBGene00268199	0	0	2	8	1	1		WBGene00268199	5	5	0	8	1	1			WBGene00019650	185.859	125.585	66.1859	54.1746	88.5308	67.8314		WBGene00020589	379.995	218.363	254.481	115.867	110.524	160.961		WBGene00015339
WBGene00023255	3	3	0	3	0	0		WBGene00023255	2	1	1	3	0	0		WBGene00023255	3	0	0	3	0	0		WBGene00023255	1	3	2	3	0	0			WBGene00019648	46.9644	56.183	28.3654	16.4581	27.7218	22.6105		WBGene00020592	1689.5	2182.86	798.788	352.464	846.299	575.168		WBGene00006523
WBGene00016694	1	0	0	5	0	1		WBGene00016694	3	0	0	5	0	1		WBGene00016694	0	1	1	5	0	1		WBGene00016694	0	0	0	5	0	1			WBGene00019649	155.882	70.5041	37.8205	84.3478	69.7515	43.4121		WBGene00020588	2670.2	3245.36	1228.81	4890.74	4577.8	3578.7		WBGene00017843
WBGene00166784	0	0	0	0	0	0		WBGene00166784	0	0	0	0	0	0		WBGene00166784	0	0	0	0	0	0		WBGene00166784	0	0	0	0	0	0			WBGene00004136	236.821	418.618	3031.05	1566.95	1545.26	1355.72		WBGene00020593	68.2625	97.2219	38.879	106.954	63.1566	36.4845		WBGene00003573
WBGene00016692	0	2	0	4	4	1		WBGene00016692	1	1	0	4	4	1		WBGene00016692	2	3	0	4	4	1		WBGene00016692	0	0	0	4	4	1			WBGene00019651	236.821	132.195	147.23	139.208	75.117	93.1552		WBGene00020587	37.5444	27.7777	4.71261	11.3437	21.0522	35.4114		WBGene00015739
WBGene00016691	0	0	0	0	0	0		WBGene00016691	1	0	0	0	0	0		WBGene00016691	0	0	0	0	0	0		WBGene00016691	0	0	0	0	0	0			WBGene00000862	16.9871	27.5407	18.9103	19.8869	10.731	25.3237		WBGene00019234	387.959	272.376	527.812	148.278	156.839	327.288		WBGene00005657
WBGene00016689	0	0	0	0	0	0		WBGene00016689	0	0	0	0	0	0		WBGene00016689	0	0	0	0	0	0		WBGene00016689	0	0	0	0	0	0			WBGene00003374	206.843	212.614	651.053	488.257	505.251	561.644		WBGene00019233	29.5804	8.48762	11.7815	4.86157	9.47349	6.43845		WBGene00005655
WBGene00016690	2	2	0	2	0	0		WBGene00016690	1	1	1	2	0	0		WBGene00016690	5	1	0	2	0	0		WBGene00016690	0	0	0	2	0	0			WBGene00021975	641.514	646.655	665.912	182.411	410.461	372.621		WBGene00019232	271.912	226.079	140.2	142.606	178.944	126.623		WBGene00019644
WBGene00172926	0	0	0	0	0	0		WBGene00172926	0	0	0	0	0	0		WBGene00172926	0	0	0	0	0	0		WBGene00172926	0	0	0	0	0	0			WBGene00021976	42.9674	66.0976	5.40293	5.48603	5.3655	18.0884		WBGene00019236	449.395	1260.03	3431.96	192.842	1963.12	2529.24		WBGene00019645
WBGene00016695	43	4	96	72	5	0		WBGene00016695	105	57	0	72	5	0		WBGene00016695	1	7	121	72	5	0		WBGene00016695	0	57	83	72	5	0			WBGene00021977	235.821	397.687	153.984	165.953	222.668	197.163		WBGene00015340	135.387	665.121	2590.76	528.29	4416.75	4711.87		WBGene00044535
WBGene00006281	0	0	0	0	0	0		WBGene00006281	0	0	0	0	0	0		WBGene00006281	0	1	1	0	0	0		WBGene00006281	0	0	0	0	0	0			WBGene00021978	25.9803	23.1342	2.70147	9.60056	8.04825	18.0884		WBGene00015339	93.2922	510.801	4078.77	427.008	6344.08	7707.89		WBGene00019647
WBGene00016696	2	0	0	1	1	1		WBGene00016696	1	1	3	1	1	1		WBGene00016696	0	4	1	1	1	1		WBGene00016696	2	5	1	1	1	1			WBGene00021979	141.892	113.468	44.5742	21.2584	42.0298	65.1182		WBGene00006523	566.579	877.312	1351.34	2024.03	2370.48	2389.74		WBGene00019650
WBGene00016688	0	0	0	0	0	5		WBGene00016688	0	0	0	0	0	5		WBGene00016688	0	0	0	0	0	5		WBGene00016688	0	0	0	0	0	5			WBGene00021980	32.975	50.6748	4.0522	19.2011	8.9425	20.8016		WBGene00017843	95.5676	87.9627	2.35631	183.119	62.104	6.43845		WBGene00019648
WBGene00005709	0	4	0	0	3	1		WBGene00005709	2	2	0	0	3	1		WBGene00005709	3	0	0	0	3	1		WBGene00005709	0	3	0	0	3	1			WBGene00006782	65.95	58.3862	24.3132	17.1439	16.9908	28.037		WBGene00003573	7.96396	16.2036	32.9883	35.6515	28.4205	48.2883		WBGene00019649
WBGene00044087	0	0	0	0	0	0		WBGene00044087	0	0	0	0	0	0		WBGene00044087	0	0	0	0	0	0		WBGene00044087	0	0	0	0	0	0			WBGene00015449	367.721	136.602	960.371	53.4888	118.935	100.391		WBGene00015739	241.194	196.759	102.499	67.2517	99.998	55.7999		WBGene00004136
WBGene00016687	0	0	0	0	0	0		WBGene00016687	0	0	0	0	0	0		WBGene00016687	1	0	2	0	0	0		WBGene00016687	0	8	0	0	0	0			WBGene00015450	1472.88	1091.71	1015.75	1019.03	804.825	724.44		WBGene00005657	37.5444	47.0677	43.5917	36.4618	18.947	31.1192		WBGene00019651
WBGene00016686	0	3	0	2	0	1		WBGene00016686	1	0	0	2	0	1		WBGene00016686	1	0	0	2	0	1		WBGene00016686	0	0	1	2	0	1			WBGene00015451	178.864	137.703	425.481	281.159	195.841	162.795		WBGene00005655	43.2329	64.043	169.654	153.139	203.154	290.803		WBGene00000862
WBGene00016685	0	0	0	1	0	0		WBGene00016685	0	0	0	1	0	0		WBGene00016685	0	0	0	1	0	0		WBGene00016685	0	0	0	1	0	0			WBGene00004795	229.826	210.411	782.075	515.001	437.288	433.217		WBGene00019644	109.22	262.345	77.7581	349.223	694.723	943.232		WBGene00003374
WBGene00016697	7	1	4	7	1	4		WBGene00016697	8	4	12	7	1	4		WBGene00016697	8	6	4	7	1	4		WBGene00016697	1	2	5	7	1	4			WBGene00017468	138.895	120.077	48.6264	63.7751	71.54	55.1696		WBGene00019645	683.763	1010.03	600.858	911.544	1603.13	1482.99		WBGene00021975
WBGene00021165	1	0	1	1	0	0		WBGene00021165	3	0	0	1	0	0		WBGene00021165	0	0	3	1	0	0		WBGene00021165	0	4	6	1	0	0			WBGene00044536	34.9735	20.9309	9.45513	20.5726	8.04825	10.853		WBGene00044535	922.682	527.776	49.4824	544.496	162.102	61.1652		WBGene00021976
WBGene00021166	0	2	0	0	1	0		WBGene00021166	0	0	0	0	1	0		WBGene00021166	0	0	0	0	1	0		WBGene00021166	0	0	0	0	1	0			WBGene00017467	100.924	133.297	60.783	55.5461	68.8573	104.913		WBGene00019647	2272.01	1128.08	1650.59	303.038	476.832	471.08		WBGene00021977
WBGene00003612	128	108	222	266	198	196		WBGene00003612	217	281	123	266	198	196		WBGene00003612	100	122	238	266	198	196		WBGene00003612	250	109	78	266	198	196			WBGene00004099	60.9538	200.496	218.819	244.128	1203.66	803.124		WBGene00019650	141.076	101.08	161.407	64.0106	104.208	80.4806		WBGene00021978
WBGene00021167	272	189	136	873	245	539		WBGene00021167	247	308	767	873	245	539		WBGene00021167	137	384	229	873	245	539		WBGene00021167	324	114	20	873	245	539			WBGene00000029	49.9621	137.703	198.558	255.101	1027.49	694.594		WBGene00019648	32.9936	43.2097	106.034	19.4463	32.6309	26.8269		WBGene00021979
WBGene00021168	7	0	11	25	4	10		WBGene00021168	0	8	19	25	4	10		WBGene00021168	4	5	6	25	4	10		WBGene00021168	12	10	0	25	4	10			WBGene00000031	60.9538	304.049	347.138	445.74	2095.23	1480.53		WBGene00019649	114.909	76.3886	89.5396	99.6621	82.1036	51.5076		WBGene00021980
WBGene00197292	0	0	0	0	0	0		WBGene00197292	0	0	0	0	0	0		WBGene00197292	0	0	0	0	0	0		WBGene00197292	0	0	0	0	0	0			WBGene00000030	47.9637	172.955	153.984	244.814	1107.98	823.926		WBGene00004136	572.268	1126.54	874.189	1851.45	1818.91	1608.54		WBGene00006782
WBGene00021169	0	0	0	17	2	12		WBGene00021169	0	2	1	17	2	12		WBGene00021169	0	0	1	17	2	12		WBGene00021169	13	0	0	17	2	12			WBGene00015369	363.724	622.419	83.7455	203.669	151.128	167.318		WBGene00019651	444.844	230.709	239.165	164.483	88.4193	110.527		WBGene00015449
WBGene00021164	12	5	1	14	3	3		WBGene00021164	5	5	8	14	3	3		WBGene00021164	5	24	0	14	3	3		WBGene00021164	4	4	0	14	3	3			WBGene00015370	27.9788	18.7277	32.4176	75.433	30.4045	35.2724		WBGene00000862	14.7902	14.6604	30.632	23.4976	12.6313	30.0461		WBGene00015450
WBGene00003723	70	72	62	216	189	175		WBGene00003723	120	176	178	216	189	175		WBGene00003723	54	87	80	216	189	175		WBGene00003723	152	67	17	216	189	175			WBGene00015366	24.9811	41.8618	83.7455	130.293	113.57	112.148		WBGene00003374	275.326	203.703	617.352	576.906	594.725	666.379		WBGene00015451
WBGene00018415	52	42	38	89	53	68		WBGene00018415	57	78	76	89	53	68		WBGene00018415	48	94	41	89	53	68		WBGene00018415	73	40	10	89	53	68			WBGene00015371	195.852	208.207	83.7455	192.011	161.859	125.714		WBGene00021975	483.526	682.868	616.174	215.529	483.148	442.107		WBGene00004795
WBGene00018414	20	43	0	2	7	13		WBGene00018414	1	6	27	2	7	13		WBGene00018414	28	31	0	2	7	13		WBGene00018414	34	20	1	2	7	13			WBGene00021614	182.861	181.768	179.648	155.666	160.071	211.634		WBGene00021976	21.6165	15.432	35.3446	6.48209	6.31566	21.4615		WBGene00017468
WBGene00003646	83	74	30	92	52	64		WBGene00003646	113	104	120	92	52	64		WBGene00003646	75	119	59	92	52	64		WBGene00003646	75	87	18	92	52	64			WBGene00021613	196.851	386.671	1746.5	752.272	909.453	1018.38		WBGene00021977	303.768	226.079	276.866	196.083	262.1	233.93		WBGene00044536
WBGene00003718	141	132	61	179	106	80		WBGene00003718	124	104	227	179	106	80		WBGene00003718	158	228	80	179	106	80		WBGene00003718	93	124	15	179	106	80			WBGene00021732	91.9303	144.313	1437.18	429.282	658.168	563.453		WBGene00021978	7.96396	3.85801	24.7412	11.3437	9.47349	21.4615		WBGene00017467
WBGene00003693	123	111	47	141	64	75		WBGene00003693	124	135	195	141	64	75		WBGene00003693	56	154	47	141	64	75		WBGene00003693	88	91	30	141	64	75			WBGene00016862	441.665	458.277	426.832	238.642	381.845	344.584		WBGene00021979	226.404	67.901	155.516	25.1181	49.4727	77.2613		WBGene00004099
WBGene00003617	178	147	50	210	68	75		WBGene00003617	224	159	250	210	68	75		WBGene00003617	130	216	83	210	68	75		WBGene00003617	96	155	11	210	68	75			WBGene00016863	17.9864	24.2358	0	5.48603	8.04825	7.23535		WBGene00021980	27.305	24.6913	53.0169	22.6873	10.5261	24.6807		WBGene00000029
WBGene00003716	129	134	21	170	54	88		WBGene00003716	126	150	150	170	54	88		WBGene00003716	98	130	88	170	54	88		WBGene00003716	120	137	15	170	54	88			WBGene00016864	30.9765	7.71139	13.5073	4.80028	1.7885	3.61768		WBGene00006782	56.8855	34.7221	57.7295	20.2565	19.9996	33.2653		WBGene00000031
WBGene00003724	322	195	96	398	170	165		WBGene00003724	446	391	453	398	170	165		WBGene00003724	226	357	182	398	170	165		WBGene00003724	169	251	38	398	170	165			WBGene00015067	111.915	181.768	145.879	88.4623	79.5883	126.619		WBGene00015449	441.431	482.251	32.9883	63.2004	139.997	119.111		WBGene00000030
WBGene00003686	170	141	52	202	87	89		WBGene00003686	240	165	256	202	87	89		WBGene00003686	129	201	117	202	87	89		WBGene00003686	86	135	23	202	87	89			WBGene00015076	43.9667	19.8293	44.5742	41.1453	29.5103	44.3165		WBGene00015450	1969.37	1445.98	1096.86	1204.05	947.349	859.532		WBGene00015369
WBGene00018413	97	59	51	132	59	77		WBGene00018413	51	85	149	132	59	77		WBGene00018413	69	81	69	132	59	77		WBGene00018413	95	67	17	132	59	77			WBGene00015075	3360.45	2772.79	1893.73	1134.24	1075.78	922.508		WBGene00015451	257.122	219.135	95.4304	332.207	230.522	193.153		WBGene00015370
WBGene00023039	3	5	4	19	7	8		WBGene00023039	4	1	5	19	7	8		WBGene00023039	5	11	3	19	7	8		WBGene00023039	23	1	4	19	7	8			WBGene00015074	1686.72	1099.42	2001.79	1708.9	1516.65	1731.06		WBGene00004795	377.719	413.579	351.09	608.506	514.726	514.003		WBGene00015366
WBGene00018262	20	30	20	95	21	23		WBGene00018262	29	48	41	95	21	23		WBGene00018262	43	37	35	95	21	23		WBGene00018262	46	30	4	95	21	23			WBGene00015073	175.867	171.854	1859.96	1064.29	824.499	800.411		WBGene00017468	92.1544	124.228	180.257	75.3543	84.2088	65.4575		WBGene00015371
WBGene00018261	100	97	31	57	64	62		WBGene00018261	27	116	150	57	64	62		WBGene00018261	228	188	11	57	64	62		WBGene00018261	90	60	8	57	64	62			WBGene00021731	33.9743	39.6586	17.5595	0.685754	5.3655	7.23535		WBGene00044536	50.0592	18.5185	25.9194	24.3078	9.47349	12.8769		WBGene00021614
WBGene00018264	9	5	6	6	5	0		WBGene00018264	4	9	5	6	5	0		WBGene00018264	7	11	5	6	5	0		WBGene00018264	5	4	8	6	5	0			WBGene00003567	631.521	1097.22	3210.69	1846.74	2386.75	2892.33		WBGene00017467	32.9936	54.0122	236.809	65.6312	81.051	124.477		WBGene00021613
WBGene00018260	283	272	65	224	131	149		WBGene00018260	279	324	419	224	131	149		WBGene00018260	243	415	107	224	131	149		WBGene00018260	207	332	30	224	131	149			WBGene00015683	717.456	31.9472	382.258	341.506	58.1263	22.6105		WBGene00004099	19.3411	102.623	298.073	288.453	1416.81	952.89		WBGene00021732
WBGene00006279	5	1	0	1	4	1		WBGene00006279	1	2	11	1	4	1		WBGene00006279	0	6	0	1	4	1		WBGene00006279	0	2	0	1	4	1			WBGene00015682	5.99546	5.50813	0	0.685754	19.6735	27.1326		WBGene00000029	18.2033	53.2406	307.498	301.417	1209.45	824.121		WBGene00016862
WBGene00023284	147	140	41	76	37	59		WBGene00023284	276	158	181	76	37	59		WBGene00023284	215	248	82	76	37	59		WBGene00023284	64	270	30	76	37	59			WBGene00000455	17.9864	39.6586	36.4698	58.9749	45.6068	77.7801		WBGene00000031	12.5148	135.03	524.278	526.67	2466.27	1756.62		WBGene00015067
WBGene00018265	43	43	98	149	103	164		WBGene00018265	69	82	130	149	103	164		WBGene00018265	93	65	79	149	103	164		WBGene00018265	151	73	39	149	103	164			WBGene00015684	1383.95	1789.04	941.461	653.524	1038.22	667.461		WBGene00000030	11.3771	85.6478	341.664	289.263	1304.18	977.571		WBGene00015076
WBGene00202502	0	1	0	3	0	0		WBGene00202502	0	0	0	3	0	0		WBGene00202502	6	0	0	3	0	0		WBGene00202502	3	0	6	3	0	0			WBGene00044538	105.92	176.26	9.45513	18.5154	71.54	68.7359		WBGene00015369	465.323	220.678	328.705	240.648	177.891	198.519		WBGene00015075
WBGene00018266	23	28	17	57	58	44		WBGene00018266	29	56	45	57	58	44		WBGene00018266	33	45	21	57	58	44		WBGene00018266	61	38	6	57	58	44			WBGene00016429	39.9697	80.4188	22.9625	74.0615	64.386	112.148		WBGene00015370	20.4788	13.8888	41.2353	89.1287	35.7887	41.8499		WBGene00015074
WBGene00021163	25	15	11	27	11	18		WBGene00021163	26	20	41	27	11	18		WBGene00021163	21	24	11	27	11	18		WBGene00021163	26	18	2	27	11	18			WBGene00016431	265.799	297.439	467.354	108.349	377.374	274.039		WBGene00015366	106.945	57.8702	151.982	153.95	133.681	133.061		WBGene00015073
WBGene00021162	7	8	0	5	26	24		WBGene00021162	2	5	79	5	26	24		WBGene00021162	1	5	0	5	26	24		WBGene00021162	7	13	0	5	26	24			WBGene00016428	200.848	251.171	56.7308	78.176	64.386	78.6845		WBGene00015371	336.762	211.419	240.343	226.873	190.522	149.157		WBGene00003567
WBGene00044521	6	10	14	11	91	51		WBGene00044521	4	2	49	11	91	51		WBGene00044521	13	17	3	11	91	51		WBGene00044521	118	8	1	11	91	51			WBGene00016081	18.9856	30.8455	5.40293	48.0028	43.8183	49.7431		WBGene00021614	193.411	216.049	598.502	183.929	188.417	251.099		WBGene00015683
WBGene00000027	3	14	12	32	131	110		WBGene00000027	1	9	97	32	131	110		WBGene00000027	24	23	0	32	131	110		WBGene00000027	77	4	1	32	131	110			WBGene00017262	3099.65	2278.16	1354.79	743.358	1159.84	617.718		WBGene00021613	401.611	550.924	630.312	888.857	1070.5	1208.28		WBGene00015682
WBGene00196324	0	0	0	0	0	0		WBGene00196324	0	0	0	0	0	0		WBGene00196324	0	0	0	0	0	0		WBGene00196324	0	0	0	0	0	0			WBGene00017266	42.9674	59.4878	9.45513	10.9721	7.154	9.04419		WBGene00021732	163.83	255.4	365.227	507.223	774.721	668.525		WBGene00000455
WBGene00003649	68	91	11	82	20	28		WBGene00003649	74	69	74	82	20	28		WBGene00003649	61	132	38	82	20	28		WBGene00003649	41	105	13	82	20	28			WBGene00017263	273.793	67.1992	1010.35	419.682	152.917	61.5005		WBGene00016862	565.441	659.72	459.48	281.971	449.465	408.841		WBGene00000454
WBGene00020853	2	10	2	0	1	3		WBGene00020853	2	4	11	0	1	3		WBGene00020853	10	6	3	0	1	3		WBGene00020853	14	5	0	0	1	3			WBGene00000373	183.861	349.216	149.931	74.0615	213.726	337.348		WBGene00016863	15.9279	12.3456	9.42522	6.48209	9.47349	8.58459		WBGene00015684
WBGene00020852	192	183	109	219	119	122		WBGene00020852	270	268	200	219	119	122		WBGene00020852	162	255	130	219	119	122		WBGene00020852	181	223	49	219	119	122			WBGene00219673	24.9811	15.4228	9.45513	6.85754	11.6253	1.80884		WBGene00016864	69.4003	13.8888	0	5.67183	2.10522	4.2923		WBGene00044538
WBGene00020851	36	23	17	31	18	13		WBGene00020851	64	59	36	31	18	13		WBGene00020851	41	41	29	31	18	13		WBGene00020851	19	49	9	31	18	13			WBGene00004358	1678.73	1072.98	8897.28	4334.65	3940.96	2619.2		WBGene00015067	113.771	140.432	286.291	104.524	93.6823	150.23		WBGene00016429
WBGene00020849	39	32	7	25	28	34		WBGene00020849	31	42	45	25	28	34		WBGene00020849	21	35	27	25	28	34		WBGene00020849	25	29	8	25	28	34			WBGene00017264	146.889	165.244	39.1713	96.0056	74.2228	73.258		WBGene00015076	51.1969	29.3209	75.4018	48.6157	34.7361	52.5806		WBGene00016431
WBGene00003705	218	209	36	45	48	41		WBGene00003705	127	126	109	45	48	41		WBGene00003705	130	129	37	45	48	41		WBGene00003705	79	154	10	45	48	41			WBGene00017261	722.453	755.716	1939.65	1205.56	1124.07	1055.46		WBGene00015075	6150.46	3085.64	1504.5	1340.17	1266.29	1094.54		WBGene00016428
WBGene00174687	0	0	0	0	0	0		WBGene00174687	0	0	0	0	0	0		WBGene00174687	0	0	0	0	0	0		WBGene00174687	0	0	0	0	0	0			WBGene00017265	41.9682	36.3537	18.9103	34.9735	33.9815	66.927		WBGene00015074	1563.21	2442.12	3351.84	2019.17	1785.23	2053.86		WBGene00016081
WBGene00020850	165	160	32	59	42	45		WBGene00020850	143	154	65	59	42	45		WBGene00020850	143	192	37	59	42	45		WBGene00020850	104	147	28	59	42	45			WBGene00017260	54.9584	69.4025	14.8581	26.0587	22.3563	44.3165		WBGene00015073	377.719	493.054	318.101	1257.53	970.507	949.671		WBGene00017262
WBGene00268202	0	0	0	0	0	0		WBGene00268202	0	1	0	0	0	0		WBGene00268202	0	1	0	0	0	0		WBGene00268202	0	0	0	0	0	0			WBGene00001593	2.99773	15.4228	6.75367	9.60056	7.154	19.8972		WBGene00021731	26.1673	18.5185	23.5631	0.810261	6.31566	8.58459		WBGene00017266
WBGene00235117	0	0	0	0	0	0		WBGene00235117	0	0	0	0	0	0		WBGene00235117	0	0	0	0	0	0		WBGene00235117	0	0	0	0	0	0			WBGene00022589	200.848	111.264	87.7977	207.784	156.494	103.104		WBGene00003567	604.124	820.213	2541.28	2182.03	2809.42	3431.69		WBGene00017263
WBGene00021232	4	1	0	0	1	0		WBGene00021232	0	2	1	0	1	0		WBGene00021232	1	1	0	0	1	0		WBGene00021232	0	1	0	0	1	0			WBGene00022590	111.915	101.35	364.698	238.642	136.82	133.854		WBGene00015683	1879.5	378.857	8.24707	403.51	68.4197	26.8269		WBGene00000373
WBGene00021233	2	2	1	0	1	0		WBGene00021233	25	10	1	0	1	0		WBGene00021233	0	3	4	0	1	0		WBGene00021233	23	15	9	0	1	0			WBGene00022587	68.9477	76.0122	20.261	28.8017	32.193	26.2282		WBGene00015682	9.10167	16.2036	15.316	0.810261	23.1574	32.1922		WBGene00004358
WBGene00021230	4	7	2	0	3	1		WBGene00021230	13	8	0	0	3	1		WBGene00021230	9	5	0	0	3	1		WBGene00021230	13	21	6	0	3	1			WBGene00001727	4.99621	23.1342	4.0522	2.05726	11.6253	18.9928		WBGene00000455	12.5148	16.9752	43.5917	69.6825	53.6831	92.2844		WBGene00017264
WBGene00021234	11	12	2	0	8	5		WBGene00021234	5	15	13	0	8	5		WBGene00021234	7	19	3	0	8	5		WBGene00021234	6	6	1	0	8	5			WBGene00020256	424.678	510.053	460.6	348.363	381.845	331.922		WBGene00000454	4.55084	8.48762	17.6723	4.86157	14.7365	23.6076		WBGene00017261
WBGene00021235	112	151	52	93	98	107		WBGene00021235	67	198	140	93	98	107		WBGene00021235	184	142	82	93	98	107		WBGene00021235	226	125	25	93	98	107			WBGene00020254	15.9879	31.9472	28.3654	17.8296	23.2505	18.0884		WBGene00015684	1549.56	1729.93	870.655	772.179	1222.08	791.929		WBGene00017265
WBGene00021236	35	26	5	1	5	0		WBGene00021236	25	21	6	1	5	0		WBGene00021236	30	21	2	1	5	0		WBGene00021236	5	25	8	1	5	0			WBGene00001037	1752.67	1716.33	5616.35	2990.57	4094.77	4085.26		WBGene00044538	12.5148	87.1911	163.763	21.8771	84.2088	81.5536		WBGene00017260
WBGene00017500	17	14	3	0	3	1		WBGene00017500	18	11	5	0	3	1		WBGene00017500	7	12	2	0	3	1		WBGene00017500	5	7	1	0	3	1			WBGene00003637	161.877	127.789	153.984	168.01	140.397	174.553		WBGene00016429	23.8919	50.1541	311.032	87.5082	75.7879	133.061		WBGene00001593
WBGene00017501	26809	23336	6237	413	4913	1843		WBGene00017501	27914	17519	1964	413	4913	1843		WBGene00017501	18753	10308	6341	413	4913	1843		WBGene00017501	6714	10973	4577	413	4913	1843			WBGene00016061	997.244	866.98	1726.24	1828.91	813.768	802.22		WBGene00016431	216.165	425.924	113.103	128.021	444.201	325.141		WBGene00022588
WBGene00017498	7668	8468	1747	347	1706	826		WBGene00017498	7852	5190	1417	347	1706	826		WBGene00017498	6659	4680	1488	347	1706	826		WBGene00017498	2452	3369	1465	347	1706	826			WBGene00016060	805.39	872.488	1071.13	1027.26	653.697	583.35		WBGene00016428	134.25	109.568	281.579	92.3698	75.7879	93.3575		WBGene00022589
WBGene00017490	31	47	7	1	3	3		WBGene00017490	19	24	4	1	3	3		WBGene00017490	19	13	7	1	3	3		WBGene00017490	5	17	4	1	3	3			WBGene00016059	480.636	629.029	316.072	397.052	420.298	425.077		WBGene00016081	4.55084	23.9197	60.0858	56.7183	51.5779	59.0191		WBGene00022590
WBGene00017499	16	23	3	1	0	0		WBGene00017499	23	12	7	1	0	0		WBGene00017499	13	18	3	1	0	0		WBGene00017499	3	19	4	1	0	0			WBGene00001710	7.99394	16.5244	18.9103	18.5154	42.0298	29.8458		WBGene00017262	2178.71	2700.61	762.265	878.323	1365.24	732.91		WBGene00022587
WBGene00017497	4	4	2	5	6	2		WBGene00017497	13	5	10	5	6	2		WBGene00017497	2	11	2	5	6	2		WBGene00017497	7	8	6	5	6	2			WBGene00016062	323.755	410.907	2446.18	1260.42	1273.41	1407.28		WBGene00017266	63.7117	42.4381	50.6606	12.9642	8.42088	10.7307		WBGene00001727
WBGene00017491	1	6	0	0	3	0		WBGene00017491	2	10	1	0	3	0		WBGene00017491	2	1	0	0	3	0		WBGene00017491	2	1	0	0	3	0			WBGene00006376	1493.87	796.476	806.388	532.145	404.201	312.025		WBGene00017263	591.609	479.937	29.4538	495.88	179.996	72.969		WBGene00020256
WBGene00017492	0	7	0	3	1	2		WBGene00017492	0	5	1	3	1	2		WBGene00017492	4	2	2	3	1	2		WBGene00017492	0	0	0	3	1	2			WBGene00000477	178.864	234.646	102.656	87.0908	98.3675	131.141		WBGene00000373	142.214	339.505	453.589	87.5082	251.574	400.257		WBGene00020254
WBGene00017493	1	5	0	4	2	2		WBGene00017493	3	7	0	4	2	2		WBGene00017493	3	3	3	4	2	2		WBGene00017493	3	0	0	4	2	2			WBGene00015965	517.608	938.586	455.197	91.2053	320.142	475.725		WBGene00219673	25.0296	17.7469	8.24707	8.10261	13.6839	2.14615		WBGene00001037
WBGene00017494	5	3	0	0	0	1		WBGene00017494	0	0	0	0	0	1		WBGene00017494	2	1	1	0	0	1		WBGene00017494	0	1	0	0	0	1			WBGene00015966	749.432	1575.33	407.921	390.88	627.764	663.844		WBGene00004358	2499.55	4270.82	1974.58	5121.66	4638.85	3107.62		WBGene00003637
WBGene00017496	0	0	0	1	0	0		WBGene00017496	0	0	0	1	0	0		WBGene00017496	0	0	0	1	0	0		WBGene00017496	0	0	0	1	0	0			WBGene00015968	32.975	82.622	1.35073	14.4008	25.9333	31.6547		WBGene00017264	215.027	147.376	222.671	113.437	87.3666	86.919		WBGene00016061
WBGene00021222	0	0	0	0	0	0		WBGene00021222	0	0	0	0	0	0		WBGene00021222	0	0	0	0	0	0		WBGene00021222	0	1	0	0	0	0			WBGene00015969	6.9947	5.50813	21.6117	35.6592	11.6253	18.0884		WBGene00017261	1046.69	1067.9	526.634	1424.44	1323.13	1252.28		WBGene00016060
WBGene00021224	5	6	11	0	0	0		WBGene00021224	5	2	1	0	0	0		WBGene00021224	1	4	6	0	0	0		WBGene00021224	7	2	3	0	0	0			WBGene00002215	386.707	566.236	846.91	647.352	792.306	891.757		WBGene00017265	116.046	55.5554	116.637	41.3233	39.9992	79.4075		WBGene00016059
WBGene00021223	0	0	0	0	0	0		WBGene00021223	0	0	0	0	0	0		WBGene00021223	0	0	0	0	0	0		WBGene00021223	0	0	0	0	0	0			WBGene00219824	4224.8	4041.87	1083.29	1024.52	1233.17	1319.55		WBGene00017260	34.1313	51.6973	106.034	30.7899	26.3153	52.5806		WBGene00001710
WBGene00021221	0	0	0	0	0	0		WBGene00021221	0	0	0	0	0	0		WBGene00021221	0	0	0	0	0	0		WBGene00021221	0	0	0	0	0	0			WBGene00003927	678.486	1041.04	5116.58	2699.13	3196.95	3276.71		WBGene00001593	5.68855	10.8024	35.3446	11.3437	8.42088	23.6076		WBGene00016062
WBGene00021225	0	0	0	0	0	0		WBGene00021225	0	0	0	0	0	0		WBGene00021225	0	0	0	0	0	0		WBGene00021225	0	0	0	0	0	0			WBGene00235161	102.922	100.248	72.9396	70.6327	101.05	113.052		WBGene00022588	12.5148	16.2036	16.4941	8.91287	2.10522	6.43845		WBGene00006376
WBGene00021226	3	6	0	5	2	1		WBGene00021226	6	4	4	5	2	1		WBGene00021226	2	7	1	5	2	1		WBGene00021226	1	3	1	5	2	1			WBGene00235160	1041.21	1068.58	860.417	696.04	1041.8	983.104		WBGene00022589	201.375	257.715	126.062	245.509	184.207	122.33		WBGene00000477
WBGene00021227	2	0	0	2	7	8		WBGene00021227	0	3	0	2	7	8		WBGene00021227	0	0	0	2	7	8		WBGene00021227	2	0	1	2	7	8			WBGene00235159	511.612	397.687	214.767	573.29	498.097	451.305		WBGene00022590	100.118	117.284	70.6892	281.971	161.049	158.815		WBGene00015965
WBGene00021220	0	0	0	0	0	0		WBGene00021220	0	1	0	0	0	0		WBGene00021220	0	0	0	0	0	0		WBGene00021220	0	0	0	0	0	0			WBGene00016990	560.575	468.191	1480.4	699.469	458.75	429.599		WBGene00022587	31.8559	45.5245	49.4824	34.031	37.894	31.1192		WBGene00015966
WBGene00021219	0	0	0	0	0	4		WBGene00021219	1	0	0	0	0	4		WBGene00021219	0	0	0	0	0	4		WBGene00021219	0	0	0	0	0	4			WBGene00016989	1009.24	630.13	533.54	420.367	422.98	389.805		WBGene00001727	14.7902	6.94442	14.1378	2.43078	13.6839	22.5346		WBGene00015968
WBGene00044734	1	0	0	0	2	0		WBGene00044734	0	0	0	0	2	0		WBGene00044734	0	0	0	0	2	0		WBGene00044734	0	0	0	0	2	0			WBGene00000795	100.924	131.094	421.429	247.557	219.091	257.76		WBGene00020256	554.064	702.158	345.199	411.613	449.465	393.818		WBGene00015969
WBGene00044099	0	0	0	0	0	0		WBGene00044099	0	0	0	0	0	0		WBGene00044099	0	0	0	0	0	0		WBGene00044099	0	0	0	0	0	0			WBGene00016992	812.384	387.773	414.675	335.334	190.475	167.318		WBGene00020254	29.5804	14.6604	18.8504	21.0668	27.3679	21.4615		WBGene00002215
WBGene00021218	0	0	0	0	0	0		WBGene00021218	0	0	0	0	0	0		WBGene00021218	0	0	0	0	0	0		WBGene00021218	0	0	0	0	0	0			WBGene00022970	573.565	381.163	313.37	195.44	214.62	133.854		WBGene00001037	2009.19	3023.14	1728.35	3533.55	4819.9	4847.08		WBGene00219824
WBGene00021217	0	0	0	0	0	0		WBGene00021217	0	0	0	0	0	0		WBGene00021217	0	0	0	0	0	0		WBGene00021217	0	0	0	0	0	0			WBGene00016993	495.624	372.35	636.195	456.027	421.192	406.989		WBGene00003637	183.171	199.845	167.298	198.514	165.26	207.103		WBGene00003927
WBGene00021228	0	0	0	0	0	0		WBGene00021228	0	0	0	0	0	0		WBGene00021228	0	0	0	0	0	0		WBGene00021228	0	0	0	0	0	0			WBGene00016988	160.878	200.496	45.9249	51.4316	81.3768	78.6845		WBGene00016061	907.892	1027	1237.06	2160.97	957.875	951.817		WBGene00235161
WBGene00044902	0	0	0	0	0	0		WBGene00044902	0	0	0	0	0	0		WBGene00044902	0	0	0	0	0	0		WBGene00044902	0	0	0	0	0	0			WBGene00019756	17.9864	88.1301	14.8581	30.8589	191.37	220.678		WBGene00016060	1360.7	1476.85	644.45	1213.77	769.458	692.133		WBGene00235160
WBGene00021216	0	0	0	0	0	0		WBGene00021216	0	0	0	0	0	0		WBGene00021216	0	0	0	0	0	0		WBGene00021216	0	0	0	0	0	0			WBGene00019755	33.9743	37.4553	4.0522	17.1439	16.9908	22.6105		WBGene00016059	461.91	519.288	592.611	469.141	494.727	504.345		WBGene00235159
WBGene00044735	0	0	0	0	0	0		WBGene00044735	0	0	0	0	0	0		WBGene00044735	0	0	0	0	0	0		WBGene00044735	0	0	0	0	0	0			WBGene00019754	109.917	149.821	1.35073	30.1732	79.5883	71.4491		WBGene00001710	1.13771	9.25923	38.879	21.8771	49.4727	35.4114		WBGene00016990
WBGene00005137	1	0	0	0	0	0		WBGene00005137	0	0	0	0	0	0		WBGene00005137	0	0	0	0	0	0		WBGene00005137	0	0	0	0	0	0			WBGene00019757	1323	1160.01	494.368	377.165	238.765	193.546		WBGene00016062	571.13	658.177	676.26	1489.26	1498.92	1669.7		WBGene00016989
WBGene00015731	0	0	0	0	1	0		WBGene00015731	0	0	0	0	1	0		WBGene00015731	0	0	0	0	1	0		WBGene00015731	1	0	0	0	1	0			WBGene00019753	23.9818	35.2521	13.5073	28.1159	20.5678	15.3751		WBGene00006376	2105.9	1316.35	514.853	628.763	475.78	370.211		WBGene00000795
WBGene00005148	0	0	0	0	0	0		WBGene00005148	0	0	0	0	0	0		WBGene00005148	0	0	0	0	0	0		WBGene00005148	0	0	0	0	0	0			WBGene00000071	286.783	306.252	153.984	183.782	165.436	124.81		WBGene00000477	121.735	112.654	289.826	102.903	115.787	155.596		WBGene00016992
WBGene00006170	0	0	0	0	0	0		WBGene00006170	0	0	0	0	0	0		WBGene00006170	0	0	0	0	0	0		WBGene00006170	0	0	0	0	0	0			WBGene00015768	50.9614	60.5895	185.05	115.892	135.032	127.523		WBGene00015965	524.484	709.874	399.394	107.765	376.834	564.437		WBGene00022970
WBGene00006171	0	0	0	0	0	0		WBGene00006171	0	0	0	0	0	0		WBGene00006171	0	0	0	0	0	0		WBGene00006171	0	0	0	0	0	0			WBGene00015767	766.419	1182.05	525.435	383.337	622.398	633.094		WBGene00015966	864.659	513.887	849.448	461.849	738.932	787.636		WBGene00016993
WBGene00015730	0	0	0	0	0	0		WBGene00015730	0	0	0	0	0	0		WBGene00015730	0	0	0	0	0	0		WBGene00015730	0	0	0	0	0	0			WBGene00003507	809.387	603.691	1017.1	654.209	591.1	545.365		WBGene00015968	17.0656	13.8888	113.103	17.0155	30.5257	37.5576		WBGene00016988
WBGene00018913	0	0	0	0	0	0		WBGene00018913	0	0	0	0	0	0		WBGene00018913	0	0	0	0	0	0		WBGene00018913	0	0	0	0	0	0			WBGene00015766	243.815	193.886	683.471	525.973	301.362	258.664		WBGene00015969	12.5148	3.85801	15.316	42.1336	13.6839	21.4615		WBGene00019756
WBGene00018914	0	0	0	0	0	0		WBGene00018914	0	0	0	0	0	0		WBGene00018914	0	0	0	0	0	0		WBGene00018914	0	0	0	0	0	0			WBGene00015765	208.842	154.228	122.917	266.073	265.592	165.509		WBGene00002215	532.448	562.498	1094.5	764.887	932.613	1058.05		WBGene00019755
WBGene00018912	0	0	0	0	0	0		WBGene00018912	0	0	0	0	0	0		WBGene00018912	0	0	0	0	0	0		WBGene00018912	0	0	0	0	0	0			WBGene00015769	117.911	113.468	503.824	348.363	325.507	270.421		WBGene00219824	6161.83	2647.37	8189.34	1210.53	1451.55	1565.62		WBGene00019754
WBGene00195293	0	0	0	0	0	0		WBGene00195293	0	0	0	0	0	0		WBGene00195293	0	0	0	0	0	0		WBGene00195293	0	0	0	0	0	0			WBGene00004104	30.9765	168.549	74.2903	65.1466	490.049	826.639		WBGene00003927	1473.33	1837.96	1751.91	3189.19	3763.08	3887.75		WBGene00019757
WBGene00018915	0	0	0	0	0	0		WBGene00018915	0	0	0	0	0	0		WBGene00018915	0	0	0	0	0	0		WBGene00018915	0	0	0	0	0	0			WBGene00017768	217.835	315.065	2496.16	879.823	1204.56	1194.74		WBGene00235161	177.483	97.2219	156.694	83.4569	118.945	134.134		WBGene00019753
WBGene00018911	0	1	0	0	0	0		WBGene00018911	3	0	0	0	0	0		WBGene00018911	0	1	0	0	0	0		WBGene00018911	0	1	0	0	0	0			WBGene00017769	1648.75	1857.34	794.231	560.947	642.966	681.932		WBGene00235160	1778.24	864.194	1795.5	822.415	1226.29	1166.43		WBGene00000071
WBGene00018917	2	0	0	0	0	0		WBGene00018917	1	0	0	0	0	0		WBGene00018917	0	0	0	0	0	0		WBGene00018917	0	0	0	0	0	0			WBGene00017767	1089.17	763.427	426.832	226.985	169.908	124.81		WBGene00235159	1492.67	509.257	1206.43	677.378	586.304	535.464		WBGene00015768
WBGene00018910	1	1	0	0	1	0		WBGene00018910	5	6	1	0	1	0		WBGene00018910	1	2	0	0	1	0		WBGene00018910	4	3	0	0	1	0			WBGene00017770	1660.74	1305.43	713.187	569.862	377.374	298.458		WBGene00016990	1304.95	1095.68	400.572	826.466	539.989	509.71		WBGene00015767
WBGene00018918	0	0	0	0	0	0		WBGene00018918	0	0	0	0	0	0		WBGene00018918	0	0	0	0	0	0		WBGene00018918	0	0	0	0	0	0			WBGene00017771	585.556	629.029	263.393	109.035	257.544	208.921		WBGene00016989	1364.11	764.658	339.308	496.69	497.885	462.495		WBGene00003507
WBGene00003521	0	0	0	0	0	0		WBGene00003521	0	0	0	0	0	0		WBGene00003521	0	0	0	0	0	0		WBGene00003521	0	0	0	0	0	0			WBGene00017772	2640	1958.69	4068.41	3549.46	2562.92	2470.87		WBGene00000795	172.932	155.092	233.274	292.504	257.889	305.826		WBGene00015766
WBGene00018919	0	0	0	0	0	0		WBGene00018919	0	0	0	0	0	0		WBGene00018919	0	0	2	0	0	0		WBGene00018919	0	0	0	0	0	0			WBGene00017766	154.883	207.106	274.199	176.925	144.869	214.347		WBGene00016992	1271.96	679.01	192.039	396.218	224.206	198.519		WBGene00015765
WBGene00018920	3	3	1	0	0	0		WBGene00018920	1	0	9	0	0	0		WBGene00018920	0	0	0	0	0	0		WBGene00018920	0	0	2	0	0	0			WBGene00017765	1415.93	1436.52	3634.82	2567.46	2727.46	2602.92		WBGene00022970	829.39	589.504	208.533	230.924	252.626	158.815		WBGene00015769
WBGene00015273	11	21	65	45	74	67		WBGene00015273	26	31	34	45	74	67		WBGene00015273	17	21	97	45	74	67		WBGene00015273	43	21	42	45	74	67			WBGene00044539	42.9674	71.6057	5.40293	15.0866	16.0965	9.94861		WBGene00016993	558.615	656.633	375.831	538.824	495.779	482.883		WBGene00004104
WBGene00015272	0	0	0	0	0	0		WBGene00015272	1	2	0	0	0	0		WBGene00015272	0	0	0	0	0	0		WBGene00015272	0	0	0	0	0	0			WBGene00269384	30.9765	25.3374	6.75367	10.9721	7.154	3.61768		WBGene00016988	145.627	104.938	208.533	60.7696	95.7875	93.3575		WBGene00017768
WBGene00015271	0	0	0	1	1	0		WBGene00015271	1	0	0	1	1	0		WBGene00015271	0	0	0	1	1	0		WBGene00015271	0	0	0	1	1	0			WBGene00019600	357.729	280.915	5055.79	1337.22	1970.93	1683.12		WBGene00019756	3.41313	20.8333	164.941	36.4618	225.259	261.83		WBGene00017769
WBGene00015270	0	0	0	0	0	0		WBGene00015270	0	0	0	0	0	0		WBGene00015270	0	1	2	0	0	0		WBGene00015270	0	0	0	0	0	0			WBGene00019601	35.9727	27.5407	16.2088	40.4595	103.733	126.619		WBGene00019755	47.7838	30.8641	7.06892	20.2565	19.9996	26.8269		WBGene00017767
WBGene00005138	0	0	0	0	0	0		WBGene00005138	1	0	0	0	0	0		WBGene00005138	0	0	0	0	0	0		WBGene00005138	0	0	0	0	0	0			WBGene00019603	16.9871	41.8618	12.1566	24.0014	33.9815	30.7503		WBGene00019754	26.1673	47.0677	149.625	35.6515	93.6823	84.7729		WBGene00017770
WBGene00005139	0	0	1	1	0	0		WBGene00005139	0	0	0	1	0	0		WBGene00005139	0	0	0	1	0	0		WBGene00005139	0	1	0	1	0	0			WBGene00019599	1019.23	955.11	1221.06	693.297	612.562	681.932		WBGene00019757	2430.15	1062.5	563.157	445.644	281.047	229.638		WBGene00017771
WBGene00006284	0	0	0	0	0	0		WBGene00006284	0	0	0	0	0	0		WBGene00006284	0	0	0	0	0	0		WBGene00006284	0	0	0	0	0	0			WBGene00044541	7.99394	6.60976	17.5595	7.5433	15.2023	26.2282		WBGene00019753	34.1313	12.3456	40.0572	33.2207	24.21	18.2423		WBGene00017772
WBGene00006136	0	0	0	0	0	0		WBGene00006136	0	0	0	0	0	0		WBGene00006136	0	0	0	0	0	0		WBGene00006136	0	0	0	0	0	0			WBGene00016892	33.9743	102.451	99.9543	71.3184	153.811	263.186		WBGene00000071	358.378	329.474	234.452	217.15	194.733	148.084		WBGene00017766
WBGene00015269	0	0	0	0	0	0		WBGene00015269	0	0	0	0	0	0		WBGene00015269	0	0	0	0	0	0		WBGene00015269	0	0	0	0	0	0			WBGene00018424	48.9629	62.7927	275.55	119.321	114.464	131.141		WBGene00015768	78.5019	104.166	78.9362	136.934	158.944	151.303		WBGene00017765
WBGene00006283	0	0	0	0	0	0		WBGene00006283	0	0	0	0	0	0		WBGene00006283	0	0	0	0	0	0		WBGene00006283	0	0	0	0	0	0			WBGene00018425	14.9886	23.1342	0	10.9721	19.6735	11.7575		WBGene00015767	576.819	1006.94	884.793	452.936	732.617	751.152		WBGene00044539
WBGene00021571	0	0	0	0	0	0		WBGene00021571	0	0	0	0	0	0		WBGene00021571	0	0	0	0	0	0		WBGene00021571	0	0	0	0	0	0			WBGene00018426	1311.01	1793.45	9386.25	4701.53	4601.81	4545.61		WBGene00003507	916.994	1138.11	607.927	772.989	695.775	647.064		WBGene00269384
WBGene00021570	0	0	0	0	1	0		WBGene00021570	0	1	0	0	1	0		WBGene00021570	0	0	0	0	1	0		WBGene00021570	0	0	0	0	1	0			WBGene00235319	984.254	640.045	407.921	268.13	172.59	148.325		WBGene00015766	265.086	375.77	177.901	621.47	354.73	306.899		WBGene00019600
WBGene00044131	0	0	0	1	0	0		WBGene00044131	0	0	0	1	0	0		WBGene00044131	0	0	0	1	0	0		WBGene00044131	0	0	0	1	0	0			WBGene00018427	124.905	127.789	1156.23	567.119	530.29	482.96		WBGene00015765	249.158	368.826	150.804	314.381	312.625	196.373		WBGene00019601
WBGene00021572	0	0	0	0	0	0		WBGene00021572	0	0	0	0	0	0		WBGene00021572	0	0	0	0	0	0		WBGene00021572	0	0	0	0	0	0			WBGene00018428	57.9561	94.7399	4.0522	43.8883	25.9333	21.7061		WBGene00015769	211.614	386.573	270.975	411.613	383.15	320.849		WBGene00019603
WBGene00021573	0	0	0	0	0	0		WBGene00021573	0	0	0	0	0	0		WBGene00021573	0	0	0	0	0	0		WBGene00021573	0	0	0	0	0	0			WBGene00018429	59.9546	73.809	16.2088	10.2863	13.4138	11.7575		WBGene00004104	11.3771	44.7529	318.101	76.9748	576.83	980.79		WBGene00019599
WBGene00021569	0	0	0	0	0	0		WBGene00021569	0	0	0	0	0	0		WBGene00021569	0	0	0	0	0	0		WBGene00021569	0	0	0	0	0	0			WBGene00018430	94.9281	117.874	40.522	41.1453	35.77	47.9342		WBGene00017768	427.779	546.294	519.565	1039.57	1417.87	1417.53		WBGene00044541
WBGene00021568	0	0	0	0	0	0		WBGene00021568	0	0	0	0	0	0		WBGene00021568	0	0	0	0	0	0		WBGene00021568	0	0	0	0	0	0			WBGene00018431	431.673	483.614	1025.21	585.634	733.285	735.293		WBGene00017769	1786.2	1360.33	1060.34	662.794	756.827	809.098		WBGene00016892
WBGene00021567	0	0	0	0	0	0		WBGene00021567	0	0	0	0	0	0		WBGene00021567	0	0	0	0	0	0		WBGene00021567	0	0	0	0	0	0			WBGene00022576	265.799	301.846	81.044	31.5447	61.7033	56.074		WBGene00017767	1797.58	837.188	278.044	268.196	199.996	148.084		WBGene00018424
WBGene00021574	0	0	0	0	0	0		WBGene00021574	0	0	0	0	0	0		WBGene00021574	0	0	0	0	0	0		WBGene00021574	0	0	0	0	0	0			WBGene00022577	147.888	410.907	6.75367	8.9148	62.5975	112.148		WBGene00017770	2788.53	1339.5	703.357	673.327	444.201	354.114		WBGene00018425
WBGene00021566	0	0	0	0	0	0		WBGene00021566	0	0	0	0	0	0		WBGene00021566	0	0	0	0	0	0		WBGene00021566	0	0	0	0	0	0			WBGene00000893	59.9546	186.175	28.3654	43.8883	214.62	398.849		WBGene00017771	797.534	578.702	305.142	128.832	303.152	247.88		WBGene00018426
WBGene00006200	0	0	0	0	0	0		WBGene00006200	0	0	0	0	0	0		WBGene00006200	0	0	0	0	0	0		WBGene00006200	0	0	0	0	0	0			WBGene00045306	167.873	235.748	47.2757	91.2053	84.0595	54.2652		WBGene00017772	3099.12	3734.55	2626.1	4193.91	3016.78	2931.64		WBGene00235319
WBGene00001758	1253	2061	852	353	2385	1673		WBGene00001758	970	2674	448	353	2385	1673		WBGene00001758	2070	1214	537	353	2385	1673		WBGene00001758	3413	800	383	353	2385	1673			WBGene00045305	810.386	1048.75	587.569	188.582	583.946	494.717		WBGene00017766	176.345	233.795	261.55	209.047	170.523	254.319		WBGene00018427
WBGene00021565	88	85	56	59	91	81		WBGene00021565	70	146	72	59	91	81		WBGene00021565	105	80	24	59	91	81		WBGene00021565	177	93	22	59	91	81			WBGene00002637	661.499	885.708	4820.77	2175.21	2291.96	2307.17		WBGene00017765	1646.27	3281.62	2495.33	3033.62	3210.46	3088.31		WBGene00018428
WBGene00172849	2	2	0	0	1	3		WBGene00172849	0	0	1	0	1	3		WBGene00172849	0	3	0	0	1	3		WBGene00172849	3	3	0	0	1	3			WBGene00000713	18261.2	9873.88	101926	55810.1	50890	22438.6		WBGene00044539	20.4788	32.4073	28.2757	17.8257	18.947	11.8038		WBGene00018429
WBGene00005607	1	0	1	0	0	1		WBGene00005607	1	2	0	0	0	1		WBGene00005607	0	0	0	0	0	1		WBGene00005607	0	0	0	0	0	1			WBGene00017833	34.9735	45.1667	1.35073	15.7723	16.9908	15.3751		WBGene00269384	75.0888	23.9197	30.632	12.9642	8.42088	4.2923		WBGene00018430
WBGene00005608	2	0	0	0	0	0		WBGene00005608	1	0	1	0	0	0		WBGene00005608	0	2	0	0	0	0		WBGene00005608	0	0	0	0	0	0			WBGene00017834	668.493	600.387	1484.46	6002.41	2178.39	2134.43		WBGene00019600	526.759	806.324	450.054	1580.01	2319.95	1996.99		WBGene00018431
WBGene00016233	30	47	2	10	6	26		WBGene00016233	5	16	18	10	6	26		WBGene00016233	80	124	2	10	6	26		WBGene00016233	3	19	0	10	6	26			WBGene00044544	217.835	145.415	22.9625	50.0601	41.1355	55.1696		WBGene00019601	20.4788	35.4937	32.9883	47.8054	122.103	150.23		WBGene00022576
WBGene00268203	0	0	0	0	0	0		WBGene00268203	0	0	0	0	0	0		WBGene00268203	0	3	0	0	0	0		WBGene00268203	0	0	0	0	0	0			WBGene00017836	71.9455	36.3537	17.5595	28.8017	22.3563	12.6619		WBGene00019603	9.10167	13.1172	43.5917	28.3591	39.9992	36.4845		WBGene00022577
WBGene00016232	3	1	0	0	0	0		WBGene00016232	0	0	3	0	0	0		WBGene00016232	0	6	2	0	0	0		WBGene00016232	0	0	0	0	0	0			WBGene00017835	152.884	334.895	14.8581	28.8017	150.234	145.612		WBGene00019599	1074	1028.55	639.737	819.174	721.038	809.098		WBGene00000893
WBGene00016231	0	0	0	0	0	4		WBGene00016231	0	0	3	0	0	4		WBGene00016231	0	4	1	0	0	4		WBGene00016231	0	0	0	0	0	4			WBGene00015360	32.975	63.8943	6.75367	53.4888	44.7125	30.7503		WBGene00044541	7.96396	5.40122	12.9597	8.91287	17.8944	31.1192		WBGene00045306
WBGene00016234	479	230	372	361	261	257		WBGene00016234	537	637	454	361	261	257		WBGene00016234	294	358	163	361	261	257		WBGene00016234	318	524	191	361	261	257			WBGene00015359	21.9833	48.4716	18.9103	32.9162	50.078	40.6989		WBGene00016892	45.5084	59.4134	215.602	84.2672	181.049	312.265		WBGene00045305
WBGene00016230	111	49	64	58	34	23		WBGene00016230	170	136	12	58	34	23		WBGene00016230	30	44	68	58	34	23		WBGene00016230	17	93	24	58	34	23			WBGene00044803	14.9886	38.5569	8.1044	6.17179	16.9908	28.9414		WBGene00018424	80.7774	107.253	61.2639	140.985	134.734	155.596		WBGene00002637
WBGene00018760	1310	1450	2144	1164	3118	2047		WBGene00018760	1783	3999	513	1164	3118	2047		WBGene00018760	1895	1950	3856	1164	3118	2047		WBGene00018760	5102	3450	1660	1164	3118	2047			WBGene00015424	15.9879	36.3537	13.5073	19.8869	8.04825	15.3751		WBGene00018425	14.7902	20.8333	50.6606	12.9642	23.1574	13.95		WBGene00000713
WBGene00018761	0	0	11	6	1	2		WBGene00018761	0	1	0	6	1	2		WBGene00018761	5	3	3	6	1	2		WBGene00018761	0	2	3	6	1	2			WBGene00015423	284.784	235.748	93.2006	139.208	61.7033	71.4491		WBGene00018426	2245.84	2451.38	2776.91	5555.15	5416.73	5393.27		WBGene00017833
WBGene00268204	2	0	2	3	1	0		WBGene00268204	4	15	0	3	1	0		WBGene00268204	2	9	5	3	1	0		WBGene00268204	3	0	0	3	1	0			WBGene00015422	186.858	310.659	29.7161	104.92	122.512	71.4491		WBGene00235319	1364.11	633.485	234.452	316.812	203.154	175.984		WBGene00017834
WBGene00018762	653	491	381	781	621	635		WBGene00018762	793	924	315	781	621	635		WBGene00018762	361	345	289	781	621	635		WBGene00018762	542	393	181	781	621	635			WBGene00015421	69.947	114.569	10.8059	61.0321	67.963	69.6403		WBGene00018427	212.752	457.56	164.941	670.086	624.198	573.022		WBGene00044544
WBGene00018759	0	0	0	0	0	0		WBGene00018759	0	0	0	0	0	0		WBGene00018759	0	0	0	0	0	0		WBGene00018759	0	0	0	0	0	0			WBGene00015427	93.9288	70.5041	21.6117	31.5447	28.616	43.4121		WBGene00018428	35.269	33.9505	38.879	51.8567	30.5257	25.7538		WBGene00017836
WBGene00000056	16	20	26	35	18	28		WBGene00000056	31	32	27	35	18	28		WBGene00000056	25	32	20	35	18	28		WBGene00000056	37	38	6	35	18	28			WBGene00015425	483.633	540.899	936.058	660.381	501.674	362.672		WBGene00018429	93.2922	52.469	86.0052	12.1539	15.7892	13.95		WBGene00017835
WBGene00173048	0	0	0	0	0	0		WBGene00173048	0	0	0	0	0	0		WBGene00173048	0	0	0	0	0	0		WBGene00173048	0	0	0	0	0	0			WBGene00015426	43.9667	92.5366	8.1044	11.6578	11.6253	27.1326		WBGene00018430	55.7477	69.4442	88.3615	48.6157	42.1044	56.8729		WBGene00015360
WBGene00018758	416	360	194	391	243	336		WBGene00018758	324	422	828	391	243	336		WBGene00018758	464	633	234	391	243	336		WBGene00018758	401	173	107	391	243	336			WBGene00015419	20.9841	15.4228	12.1566	2.05726	10.731	2.71326		WBGene00018431	597.297	1092.59	492.468	691.963	863.14	872.409		WBGene00015359
WBGene00005477	1	1	2	5	0	6		WBGene00005477	0	12	0	5	0	6		WBGene00005477	4	13	1	5	0	6		WBGene00005477	1	4	0	5	0	6			WBGene00019763	119.909	136.602	13.5073	31.5447	81.3768	44.3165		WBGene00022576	368.618	155.864	150.804	37.272	72.6301	66.5306		WBGene00044803
WBGene00197330	0	0	0	0	0	0		WBGene00197330	0	0	0	0	0	0		WBGene00197330	0	0	0	0	0	0		WBGene00197330	1	0	0	0	0	0			WBGene00019764	16.9871	29.7439	8.1044	16.4581	3.577	7.23535		WBGene00022577	15.9279	67.1294	263.906	10.5334	73.6827	133.061		WBGene00015424
WBGene00020961	0	0	1	2	0	0		WBGene00020961	0	0	0	2	0	0		WBGene00020961	0	0	1	2	0	0		WBGene00020961	1	0	1	2	0	0			WBGene00019762	762.422	743.598	1492.56	1350.25	1026.6	840.206		WBGene00000893	6.82625	40.1233	190.861	51.8567	252.626	473.226		WBGene00015423
WBGene00195346	0	0	0	0	0	0		WBGene00195346	0	0	0	0	0	0		WBGene00195346	0	0	0	0	0	0		WBGene00195346	0	0	0	0	0	0			WBGene00004206	356.73	608.098	927.954	526.659	655.486	862.816		WBGene00045306	176.345	130.401	167.298	107.765	98.9454	64.3845		WBGene00015422
WBGene00196357	0	0	0	0	0	0		WBGene00196357	0	0	0	0	0	0		WBGene00196357	0	0	0	0	0	0		WBGene00196357	0	0	0	0	0	0			WBGene00019761	237.82	550.813	55.3801	91.2053	272.746	390.709		WBGene00045305	522.209	661.263	288.647	222.822	687.354	586.972		WBGene00015421
WBGene00206511	0	0	3	0	0	0		WBGene00206511	0	0	0	0	0	0		WBGene00206511	0	0	0	0	0	0		WBGene00206511	1	0	0	0	0	0			WBGene00019765	141.892	156.431	37.8205	38.4022	37.5585	48.8386		WBGene00002637	1086.51	1233.79	1541.02	2570.15	2697.84	2737.41		WBGene00015427
WBGene00194896	27	13	11	3	9	4		WBGene00194896	65	34	4	3	9	4		WBGene00194896	22	16	20	3	9	4		WBGene00194896	9	29	10	3	9	4			WBGene00003954	330.749	297.439	113.462	141.265	118.935	168.222		WBGene00000713	43352.4	44252.2	8990.48	65943.1	59901.9	26623		WBGene00015425
WBGene00020957	282	444	1922	1825	1722	1465		WBGene00020957	676	1495	630	1825	1722	1465		WBGene00020957	284	256	2685	1825	1722	1465		WBGene00020957	1782	855	1015	1825	1722	1465			WBGene00015678	76.9417	82.622	105.357	87.7765	99.2618	129.332		WBGene00017833	23.8919	34.7221	22.3849	18.636	19.9996	18.2423		WBGene00015426
WBGene00220114	0	0	0	0	0	0		WBGene00220114	0	0	0	0	0	0		WBGene00220114	0	0	0	0	0	0		WBGene00220114	0	0	0	0	0	0			WBGene00000069	34.9735	40.7602	13.5073	20.5726	28.616	36.1768		WBGene00017834	1418.72	1361.11	4501.72	7092.22	2564.16	2532.46		WBGene00019763
WBGene00220115	0	0	0	0	0	0		WBGene00220115	0	0	0	0	0	0		WBGene00220115	0	0	0	0	0	0		WBGene00220115	0	0	0	0	0	0			WBGene00000979	20.9841	18.7277	2.70147	4.11453	21.462	53.3607		WBGene00198767	18.2033	20.0617	17.6723	11.3437	9.47349	15.023		WBGene00019764
WBGene00020962	51	57	182	340	298	276		WBGene00020962	142	241	154	340	298	276		WBGene00020962	38	44	191	340	298	276		WBGene00020962	272	147	97	340	298	276			WBGene00001508	654.504	892.318	257.99	149.494	303.151	256.855		WBGene00044544	194.548	121.913	230.918	59.1491	48.4201	65.4575		WBGene00019762
WBGene00020955	120	167	696	588	650	547		WBGene00020955	224	455	325	588	650	547		WBGene00020955	179	191	829	588	650	547		WBGene00020955	603	247	252	588	650	547			WBGene00015677	448.66	250.069	2577.2	1232.3	980.993	688.263		WBGene00017836	120.597	77.1602	21.2068	34.031	26.3153	15.023		WBGene00004206
WBGene00201661	0	0	0	0	0	0		WBGene00201661	2	0	0	0	0	0		WBGene00201661	0	0	0	0	0	0		WBGene00201661	0	1	0	0	0	0			WBGene00219683	35.9727	35.2521	21.6117	61.0321	76.0113	72.3535		WBGene00017835	42.0952	94.9071	296.895	34.031	176.839	172.765		WBGene00019761
WBGene00003579	32	63	134	300	399	405		WBGene00003579	88	167	171	300	399	405		WBGene00003579	76	70	105	300	399	405		WBGene00003579	299	79	47	300	399	405			WBGene00001345	150.886	251.171	588.92	743.358	676.053	750.668		WBGene00015360	19.3411	37.8085	91.8959	63.2004	52.6305	36.4845		WBGene00019765
WBGene00202271	0	0	1	1	1	0		WBGene00202271	1	2	1	1	1	0		WBGene00202271	0	3	0	1	1	0		WBGene00202271	3	1	1	1	1	0			WBGene00004502	417.683	809.696	6383.57	2507.8	3095	3307.46		WBGene00015359	19.3411	29.3209	37.7009	38.8925	58.9462	48.2883		WBGene00003954
WBGene00023157	0	0	0	0	0	0		WBGene00023157	0	0	0	0	0	0		WBGene00023157	0	0	0	0	0	0		WBGene00023157	0	0	0	0	0	0			WBGene00000159	2084.42	1597.36	745.605	638.437	662.64	520.041		WBGene00044803	10.2394	6.94442	36.5227	7.29235	19.9996	34.3384		WBGene00015678
WBGene00020954	220	228	313	851	735	825		WBGene00020954	421	601	885	851	735	825		WBGene00020954	216	340	330	851	735	825		WBGene00020954	475	374	152	851	735	825			WBGene00017931	334.746	412.008	1685.72	1175.38	997.983	676.506		WBGene00015424	11.3771	13.8888	7.06892	23.4976	9.47349	18.2423		WBGene00000069
WBGene00020952	119	169	432	420	604	613		WBGene00020952	101	258	497	420	604	613		WBGene00020952	238	216	163	420	604	613		WBGene00020952	745	166	138	420	604	613			WBGene00000980	99.9243	105.756	262.042	134.408	86.7423	61.5005		WBGene00015423	402.749	246.141	187.326	164.483	72.6301	84.7729		WBGene00000979
WBGene00020953	560	512	591	594	565	561		WBGene00020953	859	886	368	594	565	561		WBGene00020953	506	499	610	594	565	561		WBGene00020953	551	658	197	594	565	561			WBGene00017933	108.917	29.7439	54.0293	49.3743	35.77	8.13977		WBGene00015422	212.752	212.191	133.131	123.97	144.208	84.7729		WBGene00001508
WBGene00201453	1	3	0	0	4	2		WBGene00201453	1	2	2	0	4	2		WBGene00201453	1	2	3	0	4	2		WBGene00201453	6	0	0	0	4	2			WBGene00000534	3505.34	2472.05	2065.27	2156.01	2059.46	2028.61		WBGene00015421	56.8855	73.3022	115.459	72.1132	79.9984	82.6267		WBGene00015677
WBGene00023158	0	0	0	0	0	0		WBGene00023158	0	0	0	0	0	0		WBGene00023158	0	0	0	0	0	0		WBGene00023158	0	0	0	0	0	0			WBGene00019806	734.443	612.504	210.714	230.413	137.715	177.266		WBGene00015427	93.2922	40.1233	121.35	37.272	33.6835	51.5076		WBGene00219683
WBGene00200238	2	0	5	0	0	0		WBGene00200238	0	1	2	0	0	0		WBGene00200238	0	1	0	0	0	0		WBGene00200238	1	0	0	0	0	0			WBGene00019807	296.775	199.394	695.628	501.286	477.53	458.541		WBGene00015425	689.452	669.751	381.722	780.282	590.514	430.303		WBGene00001345
WBGene00021564	133	200	502	571	576	589		WBGene00021564	271	454	737	571	576	589		WBGene00021564	322	303	787	571	576	589		WBGene00021564	830	407	333	571	576	589			WBGene00019808	411.688	311.76	430.884	442.997	306.728	251.429		WBGene00015426	22.7542	14.6604	73.0455	13.7744	13.6839	32.1922		WBGene00004502
WBGene00021563	175	267	947	848	912	835		WBGene00021563	325	748	546	848	912	835		WBGene00021563	277	267	967	848	912	835		WBGene00021563	1172	424	367	848	912	835			WBGene00021389	667.494	1589.65	58.0815	81.6047	273.641	435.93		WBGene00019763	79.6396	128.858	48.3043	37.272	95.7875	52.5806		WBGene00000159
WBGene00021562	794	1584	9107	6896	9870	9330		WBGene00021562	1649	3360	4208	6896	9870	9330		WBGene00021562	2026	1594	9591	6896	9870	9330		WBGene00021562	12277	3182	3716	6896	9870	9330			WBGene00021392	1494.87	1101.63	541.644	338.077	248.602	211.634		WBGene00019764	13.6525	3.85801	16.4941	19.4463	4.21044	8.58459		WBGene00017931
WBGene00016048	903	961	1944	3697	2866	2799		WBGene00016048	1614	2507	2431	3697	2866	2799		WBGene00016048	969	1227	2398	3697	2866	2799		WBGene00016048	2481	1455	928	3697	2866	2799			WBGene00021391	372.718	261.086	663.21	495.8	283.477	278.561		WBGene00019762	1238.97	1624.99	896.574	1595.4	1208.4	996.886		WBGene00000980
WBGene00199406	2	2	0	8	1	2		WBGene00199406	2	0	1	8	1	2		WBGene00199406	4	5	1	8	1	2		WBGene00199406	0	0	0	8	1	2			WBGene00000802	4517.58	9337.39	27829.2	18696.4	29927.9	33823.5		WBGene00004206	349.277	392.746	1087.44	622.281	771.563	1023.71		WBGene00017933
WBGene00016049	0	6	2	0	2	1		WBGene00016049	0	1	3	0	2	1		WBGene00016049	0	0	0	0	2	1		WBGene00016049	0	0	0	0	2	1			WBGene00017535	155.882	310.659	13.5073	17.8296	47.3953	116.67		WBGene00019761	52.3346	135.802	460.658	107.765	321.046	463.568		WBGene00000534
WBGene00016047	0	0	0	0	0	0		WBGene00016047	0	0	0	0	0	0		WBGene00016047	2	0	0	0	0	0		WBGene00016047	4	0	0	0	0	0			WBGene00017534	531.597	435.143	1221.06	815.362	659.063	558.027		WBGene00019765	149.04	84.8762	81.2925	45.3746	44.2096	57.946		WBGene00019806
WBGene00016050	0	0	0	0	0	0		WBGene00016050	0	0	0	0	0	0		WBGene00016050	0	0	0	0	0	0		WBGene00016050	3	0	0	0	0	0			WBGene00017536	1228.07	1390.25	613.233	534.202	513.3	599.63		WBGene00003954	510.831	239.968	638.559	166.914	139.997	199.592		WBGene00019807
WBGene00016051	0	1	0	0	0	1		WBGene00016051	0	0	0	0	0	1		WBGene00016051	0	0	0	0	0	1		WBGene00016051	4	0	0	0	0	1			WBGene00017537	3001.73	1204.08	833.402	1014.23	639.389	336.444		WBGene00015678	79.6396	66.3578	122.528	103.713	116.84	153.45		WBGene00019808
WBGene00005217	0	0	0	1	0	0		WBGene00005217	0	1	0	1	0	0		WBGene00005217	0	0	0	1	0	0		WBGene00005217	0	0	0	1	0	0			WBGene00017533	121.908	124.484	13.5073	48.6885	44.7125	32.5591		WBGene00000069	19.3411	32.4073	31.8101	24.3078	33.6835	42.923		WBGene00021389
WBGene00005216	0	0	0	0	1	0		WBGene00005216	0	0	0	0	1	0		WBGene00005216	0	0	0	0	1	0		WBGene00005216	1	0	0	0	1	0			WBGene00017538	282.786	56.183	259.341	103.549	35.77	18.0884		WBGene00000979	9.10167	7.71602	106.034	4.86157	25.2626	63.3114		WBGene00021392
WBGene00006081	0	0	0	0	0	0		WBGene00006081	0	0	0	0	0	0		WBGene00006081	0	0	0	0	0	0		WBGene00006081	0	0	0	0	0	0			WBGene00006436	2563.06	4425.23	4053.55	4042.52	5894.9	5828.08		WBGene00001508	442.569	577.93	360.515	176.637	356.835	304.753		WBGene00021391
WBGene00006099	0	0	0	0	0	0		WBGene00006099	0	0	1	0	0	0		WBGene00006099	0	0	0	0	0	0		WBGene00006099	0	0	0	0	0	0			WBGene00001374	53.9591	36.3537	67.5367	109.035	120.724	132.95		WBGene00015677	668.973	806.324	216.78	1456.04	1154.71	816.609		WBGene00000802
WBGene00016052	76	52	29	1244	214	850		WBGene00016052	413	170	917	1244	214	850		WBGene00016052	57	473	408	1244	214	850		WBGene00016052	161	101	24	1244	214	850			WBGene00021067	10.9917	4.40651	12.1566	9.60056	29.5103	28.9414		WBGene00219683	17.0656	33.1789	36.5227	72.1132	89.4719	85.8459		WBGene00017535
WBGene00005214	5	0	0	0	0	2		WBGene00005214	2	0	4	0	0	2		WBGene00005214	0	1	0	0	0	2		WBGene00005214	2	0	0	0	0	2			WBGene00021066	15.9879	15.4228	24.3132	8.9148	22.3563	27.1326		WBGene00001345	250.296	303.24	475.974	878.323	795.773	890.652		WBGene00017534
WBGene00005213	8	6	0	2	1	3		WBGene00005213	0	2	0	2	1	3		WBGene00005213	5	3	0	2	1	3		WBGene00005213	10	4	0	2	1	3			WBGene00004373	1154.13	1552.19	8778.42	3088.64	4024.13	4174.8		WBGene00004502	935.197	1257.71	1618.78	2963.13	3643.08	3924.23		WBGene00017536
WBGene00005218	0	0	0	0	0	0		WBGene00005218	0	0	0	0	0	0		WBGene00005218	1	0	0	0	0	0		WBGene00005218	0	0	0	0	0	0			WBGene00021068	303.77	555.22	2053.11	2031.89	2302.69	2850.73		WBGene00000159	2860.2	1584.1	604.392	754.353	779.984	617.018		WBGene00017537
WBGene00005219	6	14	3	3	7	3		WBGene00005219	1	9	3	3	7	3		WBGene00005219	11	7	2	3	7	3		WBGene00005219	0	5	11	3	7	3			WBGene00220123	18.9856	9.91464	12.1566	19.8869	20.5678	36.1768		WBGene00017931	474.425	680.553	632.668	1388.79	1174.71	802.66		WBGene00017533
WBGene00005916	5	0	0	0	0	0		WBGene00005916	0	0	0	0	0	0		WBGene00005916	0	0	0	0	0	0		WBGene00005916	1	0	0	0	0	0			WBGene00199016	28.978	37.4553	39.1713	28.1159	35.77	38.89		WBGene00000980	145.627	126.543	117.815	158.811	102.103	72.969		WBGene00017538
WBGene00268205	0	0	0	0	0	0		WBGene00268205	0	0	0	0	0	0		WBGene00268205	0	0	0	0	0	0		WBGene00268205	0	0	0	0	0	0			WBGene00019522	108.917	113.468	70.2381	58.2891	71.54	81.3977		WBGene00017933	147.902	94.1355	10.6034	58.3388	42.1044	9.65767		WBGene00006436
WBGene00005915	0	0	0	0	0	0		WBGene00005915	0	0	1	0	0	0		WBGene00005915	0	0	0	0	0	0		WBGene00005915	0	0	0	0	0	0			WBGene00023322	6.9947	3.30488	12.1566	14.4008	11.6253	9.94861		WBGene00000534	5209.57	3091.04	2673.23	2547.46	2424.16	2406.91		WBGene00001374
WBGene00005917	0	0	0	0	0	0		WBGene00005917	0	0	0	0	0	0		WBGene00005917	0	0	0	0	0	0		WBGene00005917	0	0	0	0	0	0			WBGene00196751	15.9879	24.2358	13.5073	19.8869	12.5195	17.184		WBGene00019806	973.879	534.72	374.653	272.248	162.102	210.323		WBGene00021067
WBGene00005918	0	0	0	0	0	0		WBGene00005918	0	0	0	0	0	0		WBGene00005918	0	0	0	0	0	0		WBGene00005918	0	0	0	0	0	0			WBGene00200627	14.9886	19.8293	10.8059	4.11453	13.4138	14.4707		WBGene00019807	416.402	341.048	235.631	592.301	562.094	544.049		WBGene00021066
WBGene00005919	0	0	0	0	0	0		WBGene00005919	0	0	0	0	0	0		WBGene00005919	0	0	0	0	0	0		WBGene00005919	0	0	0	0	0	0			WBGene00019521	248.811	351.419	1360.19	1180.18	1094.56	1038.27		WBGene00019808	635.979	608.794	431.204	523.429	361.045	298.315		WBGene00004373
WBGene00005215	0	0	0	0	0	0		WBGene00005215	0	0	0	0	0	0		WBGene00005215	0	0	0	0	0	0		WBGene00005215	0	0	0	0	0	0			WBGene00006437	607.54	816.305	3216.1	1682.15	1435.27	1608.96		WBGene00021389	102.394	429.782	1402	96.4211	322.099	517.222		WBGene00021068
WBGene00019885	9	3	8	14	12	9		WBGene00019885	17	9	5	14	12	9		WBGene00019885	13	13	3	14	12	9		WBGene00019885	16	9	6	14	12	9			WBGene00019520	86.9341	224.732	35.1191	34.9735	134.138	524.563		WBGene00021392	2457.45	969.904	309.854	399.459	292.626	251.099		WBGene00220123
WBGene00000977	522	584	184	401	277	353		WBGene00000977	581	652	341	401	277	353		WBGene00000977	540	505	151	401	277	353		WBGene00000977	368	323	51	401	277	353			WBGene00017964	922.301	438.447	1276.44	851.021	445.337	677.41		WBGene00021391	695.14	574.072	300.429	585.819	333.677	330.507		WBGene00199016
WBGene00019886	6	2	0	2	2	4		WBGene00019886	12	2	1	2	2	4		WBGene00019886	3	1	0	2	2	4		WBGene00019886	2	3	2	2	2	4			WBGene00019668	46.9644	25.3374	16.2088	30.1732	4.47125	2.71326		WBGene00000802	7909.35	11093.3	21835.9	22091	35227.7	40130.8		WBGene00019522
WBGene00000978	26	17	14	47	21	20		WBGene00000978	31	32	64	47	21	20		WBGene00000978	28	37	8	47	21	20		WBGene00000978	32	18	3	47	21	20			WBGene00019669	20.9841	34.1504	9.45513	8.9148	14.308	4.5221		WBGene00017535	26.1673	41.6665	146.091	21.0668	55.7883	138.427		WBGene00196751
WBGene00005279	2	0	0	2	2	0		WBGene00005279	0	1	0	2	2	0		WBGene00005279	0	1	1	2	2	0		WBGene00005279	4	0	0	2	2	0			WBGene00019667	138.895	202.699	40.522	77.4902	104.627	92.2508		WBGene00017534	778.193	949.071	402.928	963.401	775.774	662.087		WBGene00200627
WBGene00005606	4	4	3	2	9	7		WBGene00005606	6	4	11	2	9	7		WBGene00005606	12	12	1	2	9	7		WBGene00005606	3	11	1	2	9	7			WBGene00195164	79.9394	104.655	10.8059	10.2863	100.156	68.7359		WBGene00017536	1628.06	1296.29	953.126	631.193	604.198	711.448		WBGene00019521
WBGene00005605	0	1	0	7	4	0		WBGene00005605	1	7	2	7	4	0		WBGene00005605	3	0	0	7	4	0		WBGene00005605	1	0	0	7	4	0			WBGene00023432	443.664	250.069	140.476	267.444	180.639	166.413		WBGene00017537	4222.04	3154.31	1040.31	1198.38	752.616	399.184		WBGene00006437
WBGene00019887	0	0	0	1	0	0		WBGene00019887	0	0	0	1	0	0		WBGene00019887	0	0	0	1	0	0		WBGene00019887	0	0	0	1	0	0			WBGene00019666	456.654	512.256	1537.13	1256.3	1294.87	1545.65		WBGene00017533	78.5019	101.851	104.856	57.5285	52.6305	38.6307		WBGene00019520
WBGene00004130	1239	2233	9938	6787	12892	14684		WBGene00004130	1845	3975	7000	6787	12892	14684		WBGene00004130	4140	3703	15575	6787	12892	14684		WBGene00004130	26719	4048	3339	6787	12892	14684			WBGene00019672	26.9796	19.8293	76.9918	65.8324	55.4435	70.5447		WBGene00017538	463.048	208.333	0	122.349	42.1044	21.4615		WBGene00017964
WBGene00219966	0	0	0	1	0	0		WBGene00219966	0	0	0	1	0	0		WBGene00219966	0	0	0	1	0	0		WBGene00219966	0	0	0	1	0	0			WBGene00020891	557.577	327.183	1499.31	1713.7	814.662	853.772		WBGene00006436	2962.59	3459.86	5953.21	4776.49	6938.81	6914.89		WBGene00019668
WBGene00018824	0	3	0	1	2	0		WBGene00018824	0	3	0	1	2	0		WBGene00018824	5	1	0	1	2	0		WBGene00018824	1	0	0	1	2	0			WBGene00199776	12.9902	17.626	9.45513	44.574	26.8275	14.4707		WBGene00001374	36.4067	41.6665	234.452	128.832	142.102	157.742		WBGene00019669
WBGene00236799	4	2	0	2	0	1		WBGene00236799	2	2	0	2	0	1		WBGene00236799	6	1	3	2	0	1		WBGene00236799	10	2	0	2	0	1			WBGene00020890	163.876	185.073	29.7161	122.064	118.041	94.0596		WBGene00021067	4.55084	17.7469	18.8504	11.3437	34.7361	34.3384		WBGene00019667
WBGene00018823	1811	2202	1445	572	1493	1230		WBGene00018823	1537	3300	529	572	1493	1230		WBGene00018823	1872	1258	640	572	1493	1230		WBGene00018823	2840	1497	572	572	1493	1230			WBGene00020889	42.9674	77.1139	72.9396	39.088	69.7515	80.4933		WBGene00021066	21.6165	11.574	12.9597	10.5334	26.3153	32.1922		WBGene00195164
WBGene00268206	6	12	3	0	1	3		WBGene00268206	15	1	10	0	1	3		WBGene00268206	2	2	0	0	1	3		WBGene00268206	1	2	1	0	1	3			WBGene00020893	244.814	445.057	21.6117	66.5182	136.82	117.575		WBGene00004373	2286.8	2563.26	2796.93	3649.42	4736.75	4953.31		WBGene00023432
WBGene00018825	5	3	1	0	3	0		WBGene00018825	3	0	2	0	3	0		WBGene00018825	1	1	1	0	3	0		WBGene00018825	3	1	0	0	3	0			WBGene00017430	241.817	557.423	1129.21	1433.91	2854.45	3026.19		WBGene00021068	478.976	751.541	2339.81	2400.8	2710.47	3382.33		WBGene00019666
WBGene00018826	0	0	0	0	0	0		WBGene00018826	0	3	0	0	0	0		WBGene00018826	0	0	1	0	0	0		WBGene00018826	0	1	1	0	0	0			WBGene00197643	5.99546	19.8293	1.35073	12.3436	19.6735	15.3751		WBGene00220123	12.5148	20.0617	38.879	23.4976	24.21	42.923		WBGene00019672
WBGene00005259	0	0	0	0	0	0		WBGene00005259	0	0	0	0	0	0		WBGene00005259	0	0	0	0	0	0		WBGene00005259	1	0	0	0	0	0			WBGene00017431	789.402	861.472	624.039	453.969	595.571	731.675		WBGene00199016	81.9151	49.3825	83.6489	33.2207	42.1044	46.1422		WBGene00020891
WBGene00020183	202	142	199	327	166	144		WBGene00020183	321	405	202	327	166	144		WBGene00020183	81	150	229	327	166	144		WBGene00020183	169	201	95	327	166	144			WBGene00017433	63.9515	45.1667	37.8205	80.919	34.8758	33.4635		WBGene00019522	125.148	97.2219	84.827	68.8722	84.2088	96.5767		WBGene00199776
WBGene00005749	0	0	0	0	0	0		WBGene00005749	0	0	0	0	0	0		WBGene00005749	0	0	0	0	0	0		WBGene00005749	0	0	0	0	0	0			WBGene00019015	376.715	470.395	194.506	319.561	283.477	151.038		WBGene00023322	9.10167	5.40122	21.2068	17.0155	13.6839	11.8038		WBGene00020890
WBGene00005629	0	0	0	0	0	0		WBGene00005629	0	0	0	0	0	0		WBGene00005629	0	0	0	0	0	0		WBGene00005629	0	0	0	0	0	0			WBGene00001581	1028.22	1808.87	13641.1	11474	21238.4	20221.9		WBGene00196751	21.6165	31.6357	37.7009	23.4976	14.7365	20.3884		WBGene00020889
WBGene00005627	0	0	0	0	0	0		WBGene00005627	0	2	0	0	0	0		WBGene00005627	0	0	0	0	0	0		WBGene00005627	0	0	0	0	0	0			WBGene00019017	1914.55	4246.77	37135.7	15788.1	28707.2	25928.8		WBGene00200627	12.5148	23.9197	10.6034	4.86157	15.7892	17.1692		WBGene00020893
WBGene00023335	0	0	0	0	0	0		WBGene00023335	0	0	0	0	0	0		WBGene00023335	0	0	0	0	0	0		WBGene00023335	0	0	0	0	0	0			WBGene00020270	22.9826	60.5895	9.45513	26.7444	106.416	130.236		WBGene00019521	302.631	473.764	1182.87	1394.46	1288.39	1231.89		WBGene00017430
WBGene00023336	0	0	0	0	0	0		WBGene00023336	0	0	0	0	0	0		WBGene00023336	0	0	0	0	0	0		WBGene00023336	0	0	0	0	0	0			WBGene00020273	1466.89	1255.85	684.822	672.039	518.665	546.269		WBGene00006437	987.532	1091.82	1529.24	1987.57	1689.44	1909		WBGene00197643
WBGene00023337	0	0	0	0	0	0		WBGene00023337	0	1	0	0	0	0		WBGene00023337	0	0	0	0	0	0		WBGene00023337	0	0	0	0	0	0			WBGene00020274	2251.29	1774.72	1164.33	792.046	561.589	542.652		WBGene00019520	20.4788	57.8702	891.862	41.3233	157.892	622.383		WBGene00197663
WBGene00023338	0	0	0	0	0	0		WBGene00023338	0	0	0	0	0	0		WBGene00023338	0	0	0	0	0	0		WBGene00023338	0	0	0	0	0	0			WBGene00020275	1661.74	2437.9	7447.94	5036.18	7289.93	6461.17		WBGene00017964	1104.72	978.392	894.218	1005.53	524.2	803.733		WBGene00017431
WBGene00005626	0	0	0	0	0	0		WBGene00005626	0	0	0	0	0	0		WBGene00005626	0	0	0	0	0	0		WBGene00005626	0	0	0	0	0	0			WBGene00000110	835.367	1003.58	5450.21	4624.73	3636.02	3145.57		WBGene00019668	59.1609	22.3765	16.4941	35.6515	5.26305	3.21922		WBGene00017433
WBGene00005628	0	0	0	0	0	0		WBGene00005628	0	0	0	0	0	0		WBGene00005628	0	0	4	0	0	0		WBGene00005628	0	0	1	0	0	0			WBGene00001513	321.756	342.606	1966.67	1065.66	835.23	743.433		WBGene00019669	9.10167	10.0308	25.9194	10.5334	16.8418	5.36537		WBGene00019015
WBGene00020182	82	69	33	89	52	88		WBGene00020182	69	74	39	89	52	88		WBGene00020182	66	90	32	89	52	88		WBGene00020182	56	63	12	89	52	88			WBGene00020269	7863.04	8102.46	5986.45	3596.09	4094.77	3622.2		WBGene00019667	120.597	113.426	156.694	91.5595	123.155	109.454		WBGene00001581
WBGene00023339	0	0	0	0	0	0		WBGene00023339	0	0	0	0	0	0		WBGene00023339	0	0	0	0	0	0		WBGene00023339	0	0	0	0	0	0			WBGene00020268	4982.22	3032.78	3906.32	2304.82	2003.12	1830.54		WBGene00195164	35.269	48.6109	32.9883	12.1539	117.892	81.5536		WBGene00019017
WBGene00005635	0	0	0	0	0	0		WBGene00005635	0	1	1	0	0	0		WBGene00005635	0	0	0	0	0	0		WBGene00005635	0	0	0	0	0	0			WBGene00020267	45.9652	20.9309	41.8727	27.4302	10.731	7.23535		WBGene00023432	648.494	314.042	567.87	316.002	212.627	197.446		WBGene00020270
WBGene00005634	0	0	0	0	0	0		WBGene00005634	0	0	0	0	0	0		WBGene00005634	0	0	0	0	0	0		WBGene00005634	0	0	0	0	0	0			WBGene00020276	70.9462	44.0651	32.4176	28.8017	6.25975	20.8016		WBGene00019666	579.094	759.257	1969.87	1484.4	1524.18	1833.88		WBGene00020273
WBGene00005633	0	0	0	0	0	0		WBGene00005633	0	0	0	0	0	0		WBGene00005633	0	0	0	0	0	0		WBGene00005633	0	0	0	0	0	0			WBGene00020265	201.847	258.882	78.3425	80.919	65.2803	68.7359		WBGene00019672	37.5444	32.4073	40.0572	77.7851	65.2618	83.6998		WBGene00020274
WBGene00005476	0	0	0	3	1	0		WBGene00005476	0	0	0	3	1	0		WBGene00005476	0	0	1	3	1	0		WBGene00005476	0	0	0	3	1	0			WBGene00020264	208.842	206.004	1023.86	485.514	522.242	559.836		WBGene00020891	1235.55	536.264	602.036	2024.84	958.928	1012.98		WBGene00020275
WBGene00005478	0	0	0	3	0	3		WBGene00005478	0	0	2	3	0	3		WBGene00005478	2	5	0	3	0	3		WBGene00005478	0	1	0	3	0	3			WBGene00022646	700.469	560.728	1398.01	1257.67	973.839	875.478		WBGene00199776	54.61	20.0617	0	52.667	31.5783	17.1692		WBGene00000110
WBGene00005447	0	0	0	4	0	0		WBGene00005447	1	0	1	4	0	0		WBGene00005447	0	0	0	4	0	0		WBGene00005447	0	0	1	4	0	0			WBGene00006815	323.755	523.273	1703.27	1180.87	1963.77	2441.03		WBGene00020890	154.728	177.469	133.131	144.226	138.945	111.6		WBGene00001513
WBGene00005448	0	0	0	0	0	0		WBGene00005448	0	1	2	0	0	0		WBGene00005448	0	0	0	0	0	0		WBGene00005448	0	0	0	0	0	0			WBGene00002273	637.517	1348.39	5940.53	3194.24	7001.09	7163		WBGene00020889	18.2033	33.9505	63.6203	46.1849	82.1036	95.5036		WBGene00020269
WBGene00005449	0	0	0	0	0	0		WBGene00005449	0	0	0	0	0	0		WBGene00005449	0	0	0	0	0	0		WBGene00005449	0	0	0	0	0	0			WBGene00020911	189.856	255.577	208.013	115.207	146.657	242.384		WBGene00020893	152.453	150.462	279.222	78.5953	161.049	139.5		WBGene00020268
WBGene00018138	612	580	1196	320	1394	2548		WBGene00018138	1473	1106	179	320	1394	2548		WBGene00018138	503	436	632	320	1394	2548		WBGene00018138	1193	808	363	320	1394	2548			WBGene00020910	85.9349	52.8781	730.747	416.939	257.544	207.112		WBGene00017430	185.447	422.066	1837.92	1694.26	3359.93	3590.51		WBGene00020267
WBGene00018140	205	157	52	81	22	40		WBGene00018140	319	165	153	81	22	40		WBGene00018140	121	165	86	81	22	40		WBGene00018140	53	242	73	81	22	40			WBGene00020909	999.243	1210.69	1639.79	1470.26	1229.59	1523.95		WBGene00197643	5.68855	10.0308	20.0286	14.5847	23.1574	18.2423		WBGene00020276
WBGene00006104	0	0	0	1	0	0		WBGene00006104	0	1	1	1	0	0		WBGene00006104	0	2	0	1	0	0		WBGene00006104	0	0	0	1	0	0			WBGene00003385	158.88	254.476	158.036	130.979	186.004	185.406		WBGene00197663	2.27542	4.62961	11.7815	12.9642	16.8418	13.95		WBGene00020265
WBGene00002055	351	416	955	3715	1523	1568		WBGene00002055	494	898	1044	3715	1523	1568		WBGene00002055	439	523	601	3715	1523	1568		WBGene00002055	1375	431	187	3715	1523	1568			WBGene00020912	58.9553	79.3171	9.45513	14.4008	22.3563	24.4193		WBGene00017431	970.466	1019.29	726.92	536.393	701.038	868.117		WBGene00020264
WBGene00018139	0	1	0	0	0	1		WBGene00018139	0	0	0	0	0	1		WBGene00018139	0	0	0	0	0	1		WBGene00018139	0	0	1	0	0	1			WBGene00006723	1307.01	1089.51	629.442	557.518	595.571	540.843		WBGene00017433	64.8494	37.0369	62.4421	95.6108	41.0518	39.7037		WBGene00022646
WBGene00005751	0	0	0	0	0	0		WBGene00005751	0	0	0	0	0	0		WBGene00005751	0	0	0	0	0	0		WBGene00005751	0	0	0	0	0	0			WBGene00006722	221.832	174.057	355.243	274.987	182.427	212.539		WBGene00019015	532.448	543.208	269.797	377.582	333.677	179.203		WBGene00006815
WBGene00044523	0	0	0	1	0	0		WBGene00044523	0	0	0	1	0	0		WBGene00044523	0	0	0	1	0	0		WBGene00044523	0	0	0	1	0	0			WBGene00006721	170.871	207.106	293.109	294.189	304.939	344.584		WBGene00001581	1352.74	2931.32	6422.11	13557.3	24999.5	23992.9		WBGene00002273
WBGene00235329	0	3	0	0	0	0		WBGene00235329	0	1	1	0	0	0		WBGene00235329	1	1	0	0	0	0		WBGene00235329	3	1	0	0	0	0			WBGene00001073	485.632	1513.64	1692.47	1043.03	2418.05	4151.28		WBGene00019017	3903.48	6824.05	9518.3	18654.6	33790.9	30764		WBGene00020911
WBGene00005344	0	1	0	0	0	1		WBGene00005344	1	0	1	0	0	1		WBGene00005344	0	0	0	0	0	1		WBGene00005344	0	0	0	0	0	1			WBGene00018491	2387.19	3212.34	15887.3	7033.78	8980.06	9424.95		WBGene00020270	5.68855	23.9197	101.321	31.6002	125.261	154.523		WBGene00020910
WBGene00016281	43	11	12	95	12	21		WBGene00016281	67	41	187	95	12	21		WBGene00016281	31	167	12	95	12	21		WBGene00016281	11	88	13	95	12	21			WBGene00206358	71.9455	82.622	20.261	28.1159	39.347	30.7503		WBGene00020273	2236.74	1397.37	1055.62	794.056	610.514	648.137		WBGene00020909
WBGene00006111	3	11	1	2	0	3		WBGene00006111	4	6	0	2	0	3		WBGene00006111	2	1	0	2	0	3		WBGene00006111	0	2	0	2	0	3			WBGene00018488	406.692	494.63	2521.82	576.034	959.531	1703.93		WBGene00020274	3718.03	1907.4	746.949	935.852	661.039	643.845		WBGene00003385
WBGene00016282	175	242	65	39	103	108		WBGene00016282	97	275	192	39	103	108		WBGene00016282	158	190	38	39	103	108		WBGene00016282	229	145	39	39	103	108			WBGene00018492	137.895	84.8253	78.3425	141.951	109.993	47.9342		WBGene00020275	3770.37	4344.89	4680.8	5950.56	8580.88	7666.04		WBGene00020912
WBGene00016283	131	103	529	477	283	176		WBGene00016283	186	314	220	477	283	176		WBGene00016283	134	95	298	477	283	176		WBGene00016283	440	299	152	477	283	176			WBGene00001089	316.76	646.655	927.954	661.753	1210.82	1933.65		WBGene00000110	1574.59	2521.6	2615.5	5464.4	4279.91	3732.15		WBGene00006723
WBGene00016284	1	0	0	0	0	0		WBGene00016284	0	0	0	0	0	0		WBGene00016284	0	0	0	0	0	0		WBGene00016284	0	0	0	0	0	0			WBGene00019376	1.99849	12.1179	1.35073	17.1439	12.5195	27.1326		WBGene00001513	563.166	786.263	464.192	1259.15	983.138	882.067		WBGene00006722
WBGene00005362	5	1	1	1	2	6		WBGene00005362	2	6	4	1	2	6		WBGene00005362	5	12	0	1	2	6		WBGene00005362	3	6	0	1	2	6			WBGene00005004	29.9773	26.439	13.5073	2.74302	16.9908	11.7575		WBGene00020269	9216.58	8730.68	3071.44	4249.01	4819.9	4297.66		WBGene00006721
WBGene00016280	0	2	0	0	0	0		WBGene00016280	0	0	0	0	0	0		WBGene00016280	1	1	0	0	0	0		WBGene00016280	0	1	0	0	0	0			WBGene00019373	505.617	646.655	266.094	181.039	248.602	254.142		WBGene00020268	7040.14	4189.8	1452.66	2723.29	2357.85	2171.9		WBGene00001073
WBGene00005630	0	0	0	0	0	0		WBGene00005630	0	2	0	0	0	0		WBGene00005630	0	0	0	0	0	0		WBGene00005630	0	0	0	0	0	0			WBGene00001506	230.825	434.041	9.45513	46.6313	91.2135	105.817		WBGene00020267	94.4299	50.9257	15.316	32.4104	12.6313	8.58459		WBGene00018491
WBGene00005261	7	8	1	1	7	7		WBGene00005261	7	6	1	1	7	7		WBGene00005261	8	5	0	1	7	7		WBGene00005261	3	3	1	1	7	7			WBGene00017151	66.9493	149.821	13.5073	32.2304	32.193	33.4635		WBGene00020276	122.873	55.5554	113.103	34.031	7.36827	24.6807		WBGene00206358
WBGene00194830	0	0	0	0	0	0		WBGene00194830	0	2	0	0	0	0		WBGene00194830	0	0	1	0	0	0		WBGene00194830	0	2	0	0	0	0			WBGene00022845	47.9637	84.8253	4.0522	6.85754	14.308	53.3607		WBGene00020265	379.995	245.37	127.241	95.6108	76.8405	81.5536		WBGene00018488
WBGene00016285	50	33	4	40	37	25		WBGene00016285	31	44	32	40	37	25		WBGene00016285	67	74	0	40	37	25		WBGene00016285	39	40	1	40	37	25			WBGene00022843	35.9727	71.6057	4.0522	11.6578	10.731	15.3751		WBGene00020264	358.378	404.32	365.227	573.665	614.724	664.233		WBGene00018492
WBGene00044602	15	17	2	4	9	5		WBGene00044602	18	7	1	4	9	5		WBGene00044602	8	13	1	4	9	5		WBGene00044602	10	19	2	4	9	5			WBGene00001829	626.525	589.37	6611.84	2208.13	2388.54	1785.32		WBGene00022646	659.871	1408.95	1065.05	1486.02	1146.29	1038.74		WBGene00001089
WBGene00016279	9	3	3	9	5	4		WBGene00016279	9	4	6	9	5	4		WBGene00016279	3	7	1	9	5	4		WBGene00016279	1	18	0	9	5	4			WBGene00022847	176.866	266.594	153.984	75.433	100.156	128.428		WBGene00006815	276.463	519.288	1852.06	1395.27	2311.53	2896.23		WBGene00019376
WBGene00005453	0	0	0	0	0	0		WBGene00005453	0	0	0	0	0	0		WBGene00005453	0	0	0	0	0	0		WBGene00005453	0	0	0	0	0	0			WBGene00022848	232.824	434.041	713.187	265.387	665.322	723.535		WBGene00002273	1068.31	3267.74	2234.96	3774.2	8240.88	8498.75		WBGene00005004
WBGene00005455	0	0	0	0	0	0		WBGene00005455	0	0	0	0	0	0		WBGene00005455	0	0	0	0	0	0		WBGene00005455	0	0	0	0	0	0			WBGene00002148	344.739	349.216	2388.1	1191.15	856.692	728.058		WBGene00020911	143.351	209.104	173.188	136.124	172.628	287.584		WBGene00019373
WBGene00005888	0	1	0	0	0	0		WBGene00005888	0	0	2	0	0	0		WBGene00005888	0	0	2	0	0	0		WBGene00005888	0	1	0	0	0	0			WBGene00000784	1769.66	1944.37	4321	22752	12172.5	18681.7		WBGene00020910	176.345	247.684	80.1144	492.639	303.152	245.734		WBGene00001506
WBGene00005890	0	0	0	0	0	0		WBGene00005890	0	0	0	0	0	0		WBGene00005890	0	0	1	0	0	0		WBGene00005890	0	0	0	0	0	0			WBGene00004092	174.867	231.342	47.2757	40.4595	32.193	69.6403		WBGene00020909	1261.72	1462.96	2720.35	1737.2	1447.34	1808.13		WBGene00017151
WBGene00005884	0	0	0	0	0	0		WBGene00005884	0	0	0	0	0	0		WBGene00005884	0	0	0	0	0	0		WBGene00005884	0	0	0	0	0	0			WBGene00004740	86.9341	115.671	86.4469	96.0056	99.2618	140.185		WBGene00003385	317.421	162.036	314.567	154.76	218.943	219.98		WBGene00022845
WBGene00005308	1	0	0	0	0	0		WBGene00005308	1	1	0	0	0	0		WBGene00005308	0	0	1	0	0	0		WBGene00005308	0	3	0	0	0	0			WBGene00020424	4.99621	27.5407	39.1713	26.7444	39.347	42.5077		WBGene00020912	53.4723	23.1481	142.556	17.0155	26.3153	28.973		WBGene00022843
WBGene00005875	0	0	0	0	0	0		WBGene00005875	0	0	0	0	0	0		WBGene00005875	0	0	0	0	0	0		WBGene00005875	0	0	0	0	0	0			WBGene00044779	341.741	159.736	105.357	272.244	122.512	71.4491		WBGene00006723	1666.74	1165.12	834.132	658.742	701.038	641.698		WBGene00001829
WBGene00005869	0	0	0	0	0	0		WBGene00005869	0	0	0	0	0	0		WBGene00005869	0	0	1	0	0	0		WBGene00005869	0	2	0	0	0	0			WBGene00020425	406.692	288.626	891.484	813.99	504.357	479.342		WBGene00006722	326.523	266.203	220.315	324.915	214.732	252.172		WBGene00022847
WBGene00005873	0	0	0	0	0	0		WBGene00005873	0	0	0	0	0	0		WBGene00005873	0	0	0	0	0	0		WBGene00005873	0	0	0	0	0	0			WBGene00004897	464.648	680.805	1993.68	1529.92	1858.25	1639.71		WBGene00006721	242.332	246.141	380.543	347.602	358.94	408.841		WBGene00022848
WBGene00005454	0	0	0	0	0	0		WBGene00005454	0	0	0	0	0	0		WBGene00005454	0	0	0	0	0	0		WBGene00005454	0	0	0	0	0	0			WBGene00004062	471.643	519.968	453.846	384.022	896.039	1646.04		WBGene00001073	615.501	1120.37	2523.6	1232.41	2846.26	4925.41		WBGene00002148
WBGene00005889	0	3	0	0	0	0		WBGene00005889	0	0	0	0	0	0		WBGene00005889	0	0	0	0	0	0		WBGene00005889	1	0	0	0	0	0			WBGene00006224	70.9462	117.874	5.40293	19.2011	24.1448	42.5077		WBGene00195803	18.2033	20.8333	8.24707	4.05131	9.47349	11.8038		WBGene00000784
WBGene00005891	0	0	0	0	0	0		WBGene00005891	0	0	0	0	0	0		WBGene00005891	0	0	0	0	0	0		WBGene00005891	0	0	0	0	0	0			WBGene00019654	30.9765	31.9472	31.0669	36.345	60.809	45.221		WBGene00018491	5919.5	6307.08	8465.03	8310.85	10570.3	11182.5		WBGene00004092
WBGene00005885	0	0	0	0	0	0		WBGene00005885	4	0	0	0	0	0		WBGene00005885	0	0	0	0	0	0		WBGene00005885	0	0	0	0	0	0			WBGene00019653	44.9659	88.1301	55.3801	52.1173	77.7998	104.913		WBGene00206358	59.1609	47.8393	35.3446	33.2207	46.3148	36.4845		WBGene00004740
WBGene00005309	0	0	0	0	0	0		WBGene00005309	0	0	0	0	0	0		WBGene00005309	1	0	0	0	0	0		WBGene00005309	0	3	0	0	0	0			WBGene00019652	21.9833	17.626	14.8581	15.0866	13.4138	24.4193		WBGene00018488	1275.37	972.219	875.368	680.619	1129.45	2021.67		WBGene00020424
WBGene00005863	0	1	1	0	0	0		WBGene00005863	0	1	0	0	0	0		WBGene00005863	0	0	0	0	0	0		WBGene00005863	0	0	0	0	0	0			WBGene00001210	5.99546	11.0163	13.5073	14.4008	29.5103	8.13977		WBGene00018492	119.459	108.024	91.8959	167.724	129.471	56.8729		WBGene00044779
WBGene00005307	0	0	0	0	1	1		WBGene00005307	3	0	0	0	1	1		WBGene00005307	0	0	1	0	1	1		WBGene00005307	0	0	0	0	1	1			WBGene00019655	285.783	228.037	97.2528	80.919	116.253	255.951		WBGene00001089	328.798	467.591	1744.84	781.902	1425.23	2294.23		WBGene00020425
WBGene00165274	0	0	0	0	0	0		WBGene00165274	0	0	0	0	0	0		WBGene00165274	0	0	0	0	0	0		WBGene00165274	0	0	0	0	0	0			WBGene00003473	63.9515	24.2358	17.5595	91.2053	42.0298	64.2138		WBGene00019376	13.6525	6.94442	54.195	20.2565	14.7365	32.1922		WBGene00004897
WBGene00005876	0	0	0	0	0	0		WBGene00005876	0	0	0	0	0	0		WBGene00005876	0	0	0	0	0	0		WBGene00005876	0	0	0	0	0	0			WBGene00175027	285.783	465.988	17.5595	28.8017	151.128	206.208		WBGene00005004	21.6165	36.2653	14.1378	3.24104	19.9996	13.95		WBGene00004062
WBGene00005870	0	0	0	0	0	0		WBGene00005870	0	0	0	0	0	0		WBGene00005870	0	0	1	0	0	0		WBGene00005870	0	0	0	0	0	0			WBGene00020947	1036.21	1259.16	156.685	187.211	511.511	386.187		WBGene00019373	555.202	426.696	480.686	213.909	292.626	301.534		WBGene00006224
WBGene00005871	0	0	0	0	0	0		WBGene00005871	0	0	0	0	0	0		WBGene00005871	0	0	0	0	0	0		WBGene00005871	0	0	0	0	0	0			WBGene00020948	167.873	154.228	5181.41	1434.6	1141.06	577.924		WBGene00001506	120.597	128.086	372.296	55.0978	107.366	125.55		WBGene00019654
WBGene00005865	0	0	0	0	0	0		WBGene00005865	0	0	0	0	0	0		WBGene00005865	0	0	0	0	0	0		WBGene00005865	0	0	0	0	0	0			WBGene00020949	1023.22	589.37	711.836	568.49	320.142	247.811		WBGene00017151	119.459	47.8393	103.677	38.0823	37.894	39.7037		WBGene00019653
WBGene00005864	0	0	0	0	0	0		WBGene00005864	0	0	0	0	0	0		WBGene00005864	0	0	0	0	0	0		WBGene00005864	0	0	0	0	0	0			WBGene00020950	466.646	1132.47	11458.3	3873.83	7231.8	6730.69		WBGene00022845	4.55084	32.4073	86.0052	8.10261	16.8418	63.3114		WBGene00019652
WBGene00005886	0	8	0	0	0	0		WBGene00005886	7	0	2	0	0	0		WBGene00005886	3	1	0	0	0	0		WBGene00005886	1	0	0	0	0	0			WBGene00020951	1041.21	615.809	968.476	572.605	414.932	395.231		WBGene00022843	23.8919	17.7469	44.7698	13.7744	12.6313	18.2423		WBGene00001210
WBGene00005306	1	0	0	0	0	0		WBGene00005306	0	0	0	0	0	0		WBGene00005306	0	0	0	0	0	0		WBGene00005306	0	0	0	0	0	0			WBGene00023355	133.899	80.4188	83.7455	47.317	44.7125	35.2724		WBGene00001829	1185.49	1269.29	769.334	2609.04	2811.52	2118.25		WBGene00019655
WBGene00005305	1	0	0	0	7	0		WBGene00005305	0	0	0	0	7	0		WBGene00005305	1	2	0	0	7	0		WBGene00005305	0	0	0	0	7	0			WBGene00022623	89.9318	136.602	45.9249	56.9176	28.616	44.3165		WBGene00022847	226.404	202.16	177.901	89.1287	117.892	152.377		WBGene00003473
WBGene00005868	3	8	1	2	0	0		WBGene00005868	0	4	5	2	0	0		WBGene00005868	0	20	0	2	0	0		WBGene00005868	2	1	0	2	0	0			WBGene00001717	7.99394	6.60976	20.261	25.3729	23.2505	23.5149		WBGene00022848	276.463	467.591	448.876	313.571	783.142	858.459		WBGene00175027
WBGene00005862	0	0	0	0	0	0		WBGene00005862	0	0	0	0	0	0		WBGene00005862	0	0	0	0	0	0		WBGene00005862	0	0	0	0	0	0			WBGene00020806	127.903	338.199	370.101	429.282	1054.32	1044.6		WBGene00002148	599.573	778.547	583.186	1407.42	1008.4	863.825		WBGene00020947
WBGene00005867	0	1	0	0	0	0		WBGene00005867	0	0	0	0	0	0		WBGene00005867	0	1	0	0	0	0		WBGene00005867	0	0	0	0	0	0			WBGene00000936	101.923	187.277	124.267	202.297	246.813	300.267		WBGene00000784	2488.17	3895.05	10698.8	26882.8	14328.1	22165.4		WBGene00020948
WBGene00005872	0	0	0	0	0	0		WBGene00005872	0	0	0	0	0	0		WBGene00005872	1	0	0	0	0	0		WBGene00005872	0	0	0	0	0	0			WBGene00000244	37.9712	53.9797	2.70147	17.1439	12.5195	17.184		WBGene00004092	195.686	105.71	235.631	47.8054	37.894	82.6267		WBGene00020949
WBGene00005866	0	0	0	0	0	0		WBGene00005866	0	0	0	0	0	0		WBGene00005866	1	4	0	0	0	0		WBGene00005866	0	0	0	0	0	0			WBGene00020808	3852.08	9071.9	25377.6	17289.9	28118.8	27199.5		WBGene00004740	79.6396	66.3578	242.699	113.437	116.84	166.327		WBGene00020950
WBGene00005861	0	0	0	0	0	0		WBGene00005861	0	0	0	0	0	0		WBGene00005861	0	0	0	0	0	0		WBGene00005861	0	0	0	0	0	0			WBGene00195226	40.969	8.81301	18.9103	10.9721	17.885	9.04419		WBGene00020424	20.4788	30.0925	45.948	31.6002	46.3148	50.4345		WBGene00020951
WBGene00005859	0	0	0	0	0	0		WBGene00005859	0	0	0	0	0	0		WBGene00005859	0	0	0	0	0	0		WBGene00005859	0	0	0	0	0	0			WBGene00004984	566.571	352.521	11613.6	4573.29	3129.88	2116.34		WBGene00044779	532.448	314.814	137.844	321.674	144.208	84.7729		WBGene00023355
WBGene00005878	3	0	0	0	0	0		WBGene00005878	0	0	0	0	0	0		WBGene00005878	2	2	0	0	0	0		WBGene00005878	0	0	0	0	0	0			WBGene00004975	243.815	275.407	1172.44	852.392	596.465	536.321		WBGene00020425	633.704	718.362	353.446	961.78	593.672	568.729		WBGene00022623
WBGene00005883	0	1	1	0	0	0		WBGene00005883	0	0	0	0	0	0		WBGene00005883	0	0	0	0	0	0		WBGene00005883	0	0	0	0	0	0			WBGene00043952	62.9523	110.163	41.8727	80.919	75.117	58.7873		WBGene00004897	949.987	1056.32	1247.66	1807.69	2187.32	1945.48		WBGene00001717
WBGene00005882	0	0	2	0	0	0		WBGene00005882	3	0	0	0	0	0		WBGene00005882	0	0	0	0	0	0		WBGene00005882	0	0	0	0	0	0			WBGene00022603	147.888	199.394	1774.86	798.218	723.449	802.22		WBGene00004062	887.413	587.961	425.313	453.746	1054.72	1953		WBGene00020806
WBGene00219714	0	0	0	0	0	0		WBGene00219714	0	0	0	0	0	0		WBGene00219714	0	0	0	0	0	0		WBGene00219714	0	0	0	0	0	0			WBGene00022601	23.9818	18.7277	18.9103	13.7151	11.6253	16.2795		WBGene00006224	36.4067	50.1541	49.4824	22.6873	28.4205	50.4345		WBGene00000936
WBGene00169108	0	0	0	0	0	0		WBGene00169108	0	0	0	0	0	0		WBGene00169108	0	0	0	0	0	0		WBGene00169108	0	0	0	0	0	0			WBGene00020522	6.9947	34.1504	8.1044	4.11453	16.0965	13.5663		WBGene00019654	45.5084	63.2714	21.2068	42.9438	71.5775	53.6537		WBGene00000244
WBGene00019675	5	2	5	17	7	2		WBGene00019675	7	7	4	17	7	2		WBGene00019675	2	1	1	17	7	2		WBGene00019675	7	4	1	17	7	2			WBGene00000714	91.9303	40.7602	289.057	226.985	228.928	132.95		WBGene00019653	78.5019	70.9874	135.488	61.5798	91.5771	124.477		WBGene00020808
WBGene00077758	1	2	1	0	0	0		WBGene00077758	1	1	0	0	0	0		WBGene00077758	4	1	0	0	0	0		WBGene00077758	4	1	0	0	0	0			WBGene00000715	1009.24	319.472	11374.5	6079.9	3986.57	1618.91		WBGene00019652	12.5148	7.71602	34.1664	17.8257	15.7892	28.973		WBGene00195226
WBGene00019676	0	0	0	0	2	0		WBGene00019676	0	0	1	0	2	0		WBGene00019676	1	0	0	0	2	0		WBGene00019676	0	0	0	0	2	0			WBGene00020526	24.9811	20.9309	6.75367	35.6592	60.809	42.5077		WBGene00001210	2.27542	10.8024	24.7412	17.0155	34.7361	9.65767		WBGene00004984
WBGene00019105	207	223	278	614	512	722		WBGene00019105	205	499	854	614	512	722		WBGene00019105	359	479	410	614	512	722		WBGene00019105	960	291	193	614	512	722			WBGene00000716	1530.84	179.565	21052.5	3266.25	1657.94	436.835		WBGene00019655	134.25	223.765	273.331	95.6108	136.839	303.68		WBGene00004975
WBGene00019104	6	5	3	32	19	23		WBGene00019104	1	9	11	32	19	23		WBGene00019104	2	26	1	32	19	23		WBGene00019104	3	2	0	32	19	23			WBGene00020527	16.9871	17.626	14.8581	4.80028	8.04825	6.33094		WBGene00003473	160.417	28.5493	818.816	107.765	49.4727	76.1883		WBGene00043952
WBGene00019106	0	0	0	0	0	0		WBGene00019106	0	1	1	0	0	0		WBGene00019106	2	2	1	0	0	0		WBGene00019106	0	1	1	0	0	0			WBGene00020517	990.25	974.94	3488.94	2249.96	2456.51	2879.67		WBGene00175027	55.7477	84.1046	249.768	34.031	177.891	244.661		WBGene00022603
WBGene00005755	0	0	0	0	0	1		WBGene00005755	0	0	2	0	0	1		WBGene00005755	0	0	0	0	0	1		WBGene00005755	0	1	0	0	0	1			WBGene00020528	49.9621	29.7439	6.75367	7.5433	8.9425	17.184		WBGene00020947	430.054	628.084	430.026	221.201	602.093	458.203		WBGene00022601
WBGene00019107	0	0	0	0	0	0		WBGene00019107	0	0	1	0	0	0		WBGene00019107	0	1	0	0	0	0		WBGene00019107	0	0	0	0	0	0			WBGene00020516	1122.15	885.708	591.621	554.089	636.706	749.764		WBGene00020948	399.336	887.343	136.666	1695.07	1343.13	685.694		WBGene00020522
WBGene00019108	119	74	14	78	7	25		WBGene00019108	144	58	108	78	7	25		WBGene00019108	61	114	19	78	7	25		WBGene00019108	22	99	11	78	7	25			WBGene00020586	94.9281	83.7236	45.9249	84.3478	67.963	73.258		WBGene00020949	1444.89	968.361	230.918	671.707	376.834	294.022		WBGene00000714
WBGene00045353	0	0	0	0	0	0		WBGene00045353	0	0	1	0	0	0		WBGene00045353	0	2	0	0	0	0		WBGene00045353	0	0	0	0	0	0			WBGene00006803	2705.95	4460.49	10146.7	5012.18	7627.96	8921.19		WBGene00020950	1088.79	1781.63	3265.84	4577.17	8512.46	7985.82		WBGene00000715
WBGene00077727	0	0	0	0	0	0		WBGene00077727	0	0	0	0	0	0		WBGene00077727	1	0	1	0	0	0		WBGene00077727	0	0	0	0	0	0			WBGene00019643	75.9424	80.4188	78.3425	100.12	155.6	190.832		WBGene00020951	1702.01	931.324	256.837	676.568	488.411	468.933		WBGene00020526
WBGene00201230	0	0	0	0	0	0		WBGene00201230	0	0	0	0	0	0		WBGene00201230	0	0	0	0	0	0		WBGene00201230	0	0	0	0	0	0			WBGene00019642	475.64	507.85	97.2528	327.105	354.123	220.678		WBGene00023355	118.322	90.2775	81.2925	55.908	52.6305	41.8499		WBGene00000716
WBGene00202047	0	0	0	0	0	0		WBGene00202047	0	0	0	0	0	0		WBGene00202047	0	0	0	0	0	0		WBGene00202047	0	0	0	0	0	0			WBGene00003844	190.855	473.699	633.494	990.915	1383.41	1797.08		WBGene00022623	101.256	97.9935	137.844	67.2517	33.6835	52.5806		WBGene00020527
WBGene00019103	1	1	9	5	1	1		WBGene00019103	1	15	3	5	1	1		WBGene00019103	0	0	4	5	1	1		WBGene00019103	3	5	3	5	1	1			WBGene00006801	2004.48	3516.39	3284.98	2799.93	4908.54	4447.93		WBGene00001717	12.5148	16.9752	17.6723	29.9797	27.3679	27.8999		WBGene00020517
WBGene00016855	0	5	0	5	7	2		WBGene00016855	0	8	3	5	7	2		WBGene00016855	0	4	0	5	7	2		WBGene00016855	8	1	2	5	7	2			WBGene00021963	19.9849	66.0976	9.45513	5.48603	29.5103	90.4419		WBGene00020806	122.873	272.376	653.875	507.223	1241.03	1239.4		WBGene00020528
WBGene00255566	0	0	0	0	0	0		WBGene00255566	0	0	0	0	0	0		WBGene00255566	0	0	0	0	0	0		WBGene00255566	0	0	0	0	0	0			WBGene00005188	16.9871	24.2358	0	1.37151	3.577	22.6105		WBGene00000936	59.1609	133.487	346.377	239.027	290.52	356.261		WBGene00020516
WBGene00006271	10	1	0	0	0	0		WBGene00006271	0	0	2	0	0	0		WBGene00006271	1	1	0	0	0	0		WBGene00006271	3	1	0	0	0	0			WBGene00003165	115.912	245.663	159.387	106.978	84.9538	222.487		WBGene00000244	31.8559	26.2345	38.879	20.2565	14.7365	20.3884		WBGene00020586
WBGene00016856	0	0	0	0	0	0		WBGene00016856	0	0	2	0	0	0		WBGene00016856	0	0	0	0	0	0		WBGene00016856	3	0	0	0	0	0			WBGene00004229	126.904	275.407	16.2088	19.2011	79.5883	169.126		WBGene00020808	5861.48	12516.9	22017.3	20429.1	33098.3	32271.6		WBGene00006803
WBGene00016857	0	0	4	0	0	0		WBGene00016857	0	0	0	0	0	0		WBGene00016857	0	0	0	0	0	0		WBGene00016857	0	0	0	0	0	0			WBGene00016364	59.9546	57.2846	21.6117	18.5154	16.9908	12.6619		WBGene00195226	67.1248	30.0925	10.6034	12.9642	21.0522	10.7307		WBGene00196042
WBGene00005400	0	0	0	0	0	0		WBGene00005400	0	1	3	0	0	0		WBGene00005400	1	0	0	0	0	0		WBGene00005400	1	0	0	0	0	0			WBGene00016368	30.9765	41.8618	8.1044	18.5154	6.25975	4.5221		WBGene00194910	9.10167	12.3456	14.1378	1.62052	13.6839	13.95		WBGene00019643
WBGene00006105	0	0	0	0	0	0		WBGene00006105	0	0	0	0	0	0		WBGene00006105	0	0	0	0	0	0		WBGene00006105	0	0	0	0	0	0			WBGene00016365	68.9477	72.7074	14.8581	20.5726	16.0965	16.2795		WBGene00004984	1292.44	2172.83	471.261	5403.63	3684.14	2510.99		WBGene00019642
WBGene00016858	3	3	0	2	0	2		WBGene00016858	1	1	0	2	0	2		WBGene00016858	2	0	1	2	0	2		WBGene00016858	5	3	0	2	0	2			WBGene00016366	66.9493	72.7074	24.3132	24.0014	17.885	33.4635		WBGene00004975	368.618	684.411	341.664	1007.15	702.091	636.333		WBGene00003844
WBGene00174961	0	0	0	0	0	0		WBGene00174961	0	0	0	0	0	0		WBGene00174961	0	0	0	0	0	0		WBGene00174961	0	0	0	0	0	0			WBGene00016367	38.9705	31.9472	10.8059	26.7444	16.0965	19.8972		WBGene00043952	146.764	78.7034	51.8387	95.6108	88.4193	69.7498		WBGene00006801
WBGene00016854	0	3	0	0	0	1		WBGene00016854	0	1	0	0	0	1		WBGene00016854	0	2	0	0	0	1		WBGene00016854	0	1	0	0	0	1			WBGene00003697	197.85	320.573	76.9918	114.521	74.2228	55.1696		WBGene00022603	288.978	382.715	508.962	943.144	851.562	951.817		WBGene00021963
WBGene00016853	0	0	0	0	0	0		WBGene00016853	0	0	0	0	0	0		WBGene00016853	0	0	0	0	0	0		WBGene00016853	0	0	0	0	0	0			WBGene00003632	634.519	651.061	187.752	310.647	139.503	158.273		WBGene00022601	18.2033	27.0061	31.8101	16.2052	13.6839	19.3153		WBGene00005188
WBGene00016859	0	0	0	0	0	0		WBGene00016859	0	0	0	0	0	0		WBGene00016859	0	0	0	0	0	0		WBGene00016859	0	0	0	0	0	0			WBGene00016363	32.975	24.2358	16.2088	19.2011	22.3563	32.5591		WBGene00194821	40.9575	6.94442	11.7815	2.43078	3.15783	2.14615		WBGene00003165
WBGene00016852	3	10	0	3	2	1		WBGene00016852	1	5	7	3	2	1		WBGene00016852	9	2	0	3	2	1		WBGene00016852	6	3	1	3	2	1			WBGene00016362	251.809	295.236	180.998	158.409	243.236	268.613		WBGene00020522	12.5148	24.6913	36.5227	4.86157	18.947	16.0961		WBGene00004229
WBGene00016851	1	2	0	0	0	0		WBGene00016851	4	0	0	0	0	0		WBGene00016851	0	0	0	0	0	0		WBGene00016851	0	0	0	0	0	0			WBGene00016361	22.9826	3.30488	18.9103	15.7723	2.68275	0.904419		WBGene00000714	106.945	208.333	124.884	268.196	269.468	157.742		WBGene00016364
WBGene00016850	1	1	2	0	2	0		WBGene00016850	1	3	0	0	2	0		WBGene00016850	2	2	0	0	2	0		WBGene00016850	0	0	0	0	2	0			WBGene00016360	153.883	37.4553	105.357	171.439	69.7515	20.8016		WBGene00000715	2601.94	3617.27	594.967	7183.78	4692.54	1920.8		WBGene00016368
WBGene00016849	160	103	49	126	56	81		WBGene00016849	121	107	150	126	56	81		WBGene00016849	80	131	75	126	56	81		WBGene00016849	90	75	19	126	56	81			WBGene00017616	14.9886	37.4553	16.2088	17.1439	16.0965	28.9414		WBGene00020526	19.3411	28.5493	57.7295	42.1336	71.5775	50.4345		WBGene00016365
WBGene00016860	83	90	125	185	220	252		WBGene00016860	106	167	220	185	220	252		WBGene00016860	108	131	158	185	220	252		WBGene00016860	194	59	48	185	220	252			WBGene00017618	148.887	89.2318	31.0669	91.2053	50.9723	83.2066		WBGene00000716	5895.61	3577.15	43.5917	3859.27	1951.54	518.295		WBGene00016366
WBGene00006132	0	0	0	0	0	0		WBGene00006132	2	0	1	0	0	0		WBGene00006132	0	1	0	0	0	0		WBGene00006132	0	1	0	0	0	0			WBGene00006666	4.99621	30.8455	14.8581	25.3729	25.9333	56.9784		WBGene00020527	25.0296	20.0617	15.316	5.67183	9.47349	7.51152		WBGene00016367
WBGene00016861	0	5	0	0	0	2		WBGene00016861	4	0	0	0	0	2		WBGene00016861	0	3	1	0	0	2		WBGene00016861	0	3	0	0	0	2			WBGene00017614	42.9674	24.2358	16.2088	4.11453	6.25975	5.42652		WBGene00020517	1603.03	2432.86	3037.28	2658.47	2891.52	3416.67		WBGene00003697
WBGene00022263	1	7	2	14	3	5		WBGene00022263	7	6	3	14	3	5		WBGene00022263	6	2	3	14	3	5		WBGene00022263	8	6	0	14	3	5			WBGene00017620	1051.2	950.704	1306.16	1001.2	866.529	764.234		WBGene00020528	20.4788	33.9505	65.9766	8.91287	10.5261	20.3884		WBGene00003632
WBGene00006128	0	0	0	0	0	0		WBGene00006128	0	0	0	0	0	0		WBGene00006128	0	0	0	0	0	0		WBGene00006128	2	0	0	0	0	0			WBGene00017613	256.805	420.821	495.719	567.804	755.642	905.324		WBGene00020516	1488.12	1185.18	1122.78	654.691	749.458	889.579		WBGene00016363
WBGene00006131	0	0	0	0	0	0		WBGene00006131	0	0	0	0	0	0		WBGene00006131	0	0	0	0	0	0		WBGene00006131	0	0	0	0	0	0			WBGene00017621	192.854	264.39	398.466	384.022	549.07	586.064		WBGene00020586	70.538	76.3886	182.614	99.6621	79.9984	86.919		WBGene00016362
WBGene00006130	0	2	0	0	0	0		WBGene00006130	0	1	0	0	0	0		WBGene00006130	0	0	4	0	0	0		WBGene00006130	0	0	0	0	0	0			WBGene00003164	641.514	469.293	1181.89	621.293	490.943	333.731		WBGene00006803	3508.7	3802.46	7495.41	5922.2	8978.76	10584.8		WBGene00016360
WBGene00022264	0	0	0	0	0	0		WBGene00022264	0	0	0	0	0	0		WBGene00022264	0	0	0	0	0	0		WBGene00022264	0	0	0	0	0	0			WBGene00021959	697.471	908.842	2248.97	1597.12	1876.14	1572.79		WBGene00196042	14.7902	20.0617	17.6723	6.48209	8.42088	12.8769		WBGene00017616
WBGene00022265	0	0	15	1	0	0		WBGene00022265	0	0	0	1	0	0		WBGene00022265	0	0	22	1	0	0		WBGene00022265	0	7	17	1	0	0			WBGene00021956	867.343	1091.71	3937.39	2894.57	2510.16	2450.98		WBGene00019643	102.394	102.623	143.735	118.298	183.154	226.419		WBGene00017618
WBGene00022262	0	0	11	3	0	1		WBGene00022262	1	0	0	3	0	1		WBGene00022262	0	0	21	3	0	1		WBGene00022262	0	7	14	3	0	1			WBGene00021960	1652.75	1247.04	1180.54	1091.72	1343.16	1297.84		WBGene00019642	443.707	440.585	415.888	386.495	416.834	261.83		WBGene00006666
WBGene00022261	6	5	5	6	8	9		WBGene00022261	2	3	0	6	8	9		WBGene00022261	0	3	0	6	8	9		WBGene00022261	7	3	0	6	8	9			WBGene00044612	264.799	236.85	58.0815	106.292	168.119	166.413		WBGene00003844	204.788	324.845	1803.75	1170.83	1628.39	2132.2		WBGene00017614
WBGene00022266	0	0	0	0	0	0		WBGene00022266	0	0	0	0	0	0		WBGene00022266	0	0	0	0	0	0		WBGene00022266	0	0	0	0	0	0			WBGene00017850	97.9258	79.3171	29.7161	46.6313	43.8183	62.4049		WBGene00006801	1648.54	2543.97	4295.55	3308.3	5777.78	5277.38		WBGene00017620
WBGene00006269	0	0	0	0	0	0		WBGene00006269	0	1	0	0	0	0		WBGene00006269	0	0	0	0	0	0		WBGene00006269	0	1	0	0	0	0			WBGene00003786	2551.07	5681.09	9402.45	7380.09	10360.8	11200.3		WBGene00021963	17.0656	18.5185	137.844	6.48209	34.7361	107.307		WBGene00017613
WBGene00044524	0	0	0	0	0	0		WBGene00044524	0	0	0	0	0	0		WBGene00044524	0	0	0	0	0	0		WBGene00044524	0	0	0	0	0	0			WBGene00007029	949.281	675.297	960.371	703.584	412.249	340.966		WBGene00202501	18.2033	15.432	4.71261	19.4463	6.31566	2.14615		WBGene00017621
WBGene00022267	0	0	3	2	0	1		WBGene00022267	0	0	0	2	0	1		WBGene00022267	0	2	0	2	0	1		WBGene00022267	5	2	0	2	0	1			WBGene00020908	498.622	345.911	302.564	559.575	304.045	293.936		WBGene00005188	72.8134	27.7777	121.35	1.62052	4.21044	26.8269		WBGene00003164
WBGene00017174	8	0	15	20	8	5		WBGene00017174	9	7	6	20	8	5		WBGene00017174	5	8	12	20	8	5		WBGene00017174	19	9	0	20	8	5			WBGene00044699	129.902	98.0448	124.267	70.6327	59.9148	67.8314		WBGene00003165	124.01	97.9935	322.814	126.401	99.998	263.976		WBGene00021959
WBGene00017173	0	0	0	2	1	2		WBGene00017173	1	1	0	2	1	2		WBGene00017173	0	1	0	2	1	2		WBGene00017173	0	0	0	2	1	2			WBGene00003725	230.825	165.244	153.984	120.693	121.618	125.714		WBGene00004229	46.6461	84.1046	326.348	22.6873	93.6823	200.665		WBGene00021956
WBGene00017175	50	52	74	329	197	150		WBGene00017175	58	154	148	329	197	150		WBGene00017175	60	91	64	329	197	150		WBGene00017175	135	52	11	329	197	150			WBGene00003849	72.9447	85.9269	32.4176	45.9455	61.7033	86.8243		WBGene00016364	128.561	60.9566	35.3446	21.8771	19.9996	15.023		WBGene00021960
WBGene00017172	33	46	1	37	32	30		WBGene00017172	41	44	68	37	32	30		WBGene00017172	66	71	3	37	32	30		WBGene00017172	28	32	1	37	32	30			WBGene00017331	34.9735	12.1179	13.5073	15.0866	6.25975	8.13977		WBGene00016368	46.6461	19.2901	31.8101	21.8771	7.36827	5.36537		WBGene00044612
WBGene00016475	6	10	1	2	3	4		WBGene00016475	5	0	10	2	3	4		WBGene00016475	8	14	0	2	3	4		WBGene00016475	3	4	0	2	3	4			WBGene00017332	59.9546	69.4025	27.0147	27.4302	28.616	43.4121		WBGene00016365	83.0528	33.1789	61.2639	24.3078	18.947	19.3153		WBGene00017850
WBGene00016476	1	0	0	0	0	0		WBGene00016476	0	0	0	0	0	0		WBGene00016476	0	1	0	0	0	0		WBGene00016476	0	0	0	0	0	0			WBGene00001399	713.459	760.122	629.442	190.64	384.528	490.195		WBGene00016366	76.2265	49.3825	67.1547	28.3591	21.0522	39.7037		WBGene00003786
WBGene00016477	0	0	5	0	0	0		WBGene00016477	2	2	3	0	0	0		WBGene00016477	0	0	0	0	0	0		WBGene00016477	0	0	0	0	0	0			WBGene00017335	54.9584	79.3171	114.812	41.1453	111.781	106.721		WBGene00016367	38.6821	30.0925	24.7412	31.6002	18.947	23.6076		WBGene00007029
WBGene00016478	0	0	0	0	0	0		WBGene00016478	1	0	0	0	0	0		WBGene00016478	4	0	0	0	0	0		WBGene00016478	0	0	0	0	0	0			WBGene00017329	126.904	221.427	90.4991	15.0866	47.3953	23.5149		WBGene00003697	344.726	187.499	222.671	135.314	87.3666	65.4575		WBGene00020908
WBGene00016479	1	0	0	0	0	0		WBGene00016479	0	0	0	0	0	0		WBGene00016479	0	0	0	0	0	0		WBGene00016479	0	0	0	0	0	0			WBGene00017336	927.297	1010.19	752.358	118.635	206.572	189.928		WBGene00003632	1036.45	475.307	762.265	367.048	164.207	187.788		WBGene00044699
WBGene00016480	3	0	0	0	0	0		WBGene00016480	0	0	0	0	0	0		WBGene00016480	1	5	0	0	0	0		WBGene00016480	1	0	0	0	0	0			WBGene00017315	52.9599	14.3211	18.9103	26.7444	21.462	20.8016		WBGene00016363	34.1313	13.1172	37.7009	22.6873	26.3153	38.6307		WBGene00003725
WBGene00016474	345	656	92	142	175	172		WBGene00016474	296	374	285	142	175	172		WBGene00016474	757	521	57	142	175	172		WBGene00016474	501	498	54	142	175	172			WBGene00017314	15.9879	35.2521	56.7308	59.6606	81.3768	94.0596		WBGene00016362	259.398	222.993	318.101	187.17	286.31	318.703		WBGene00003849
WBGene00016481	93	154	12	27	24	8		WBGene00016481	66	70	74	27	24	8		WBGene00016481	66	78	2	27	24	8		WBGene00016481	80	52	20	27	24	8			WBGene00017313	411.688	477.004	860.417	1018.34	683.207	476.629		WBGene00016361	53.4723	6.94442	5.89076	18.636	3.15783	1.07307		WBGene00017331
WBGene00016483	8	66	4	1	6	7		WBGene00016483	11	8	2	1	6	7		WBGene00016483	20	8	0	1	6	7		WBGene00016483	87	25	1	1	6	7			WBGene00017312	27.9788	70.5041	63.4845	164.581	224.457	250.524		WBGene00016360	332.211	158.178	31.8101	202.565	82.1036	24.6807		WBGene00017332
WBGene00016473	0	1	2	0	0	0		WBGene00016473	0	0	5	0	0	0		WBGene00016473	1	4	0	0	0	0		WBGene00016473	0	3	0	0	0	0			WBGene00017316	1348.98	1014.6	1022.51	911.367	547.281	326.495		WBGene00017616	15.9279	16.9752	44.7698	20.2565	18.947	34.3384		WBGene00017334
WBGene00016484	7	27	0	0	3	1		WBGene00016484	1	2	8	0	3	1		WBGene00016484	13	6	0	0	3	1		WBGene00016484	54	3	0	0	3	1			WBGene00017317	410.689	657.671	6633.45	2824.62	3036.87	2809.13		WBGene00017618	194.548	114.969	117.815	107.765	59.9988	98.7228		WBGene00001399
WBGene00016472	0	0	1	1	1	0		WBGene00016472	0	0	0	1	1	0		WBGene00016472	3	0	0	1	1	0		WBGene00016472	0	0	0	1	1	0			WBGene00017311	147.888	221.427	3113.44	1339.28	1642.74	1444.36		WBGene00006666	6.82625	5.40122	35.3446	29.9797	30.5257	67.6037		WBGene00017335
WBGene00016471	1	0	0	0	0	1		WBGene00016471	0	1	7	0	0	1		WBGene00016471	0	6	0	0	0	1		WBGene00016471	0	0	0	0	0	1			WBGene00017310	137.895	129.992	295.811	337.391	311.199	283.083		WBGene00017614	22.7542	13.8888	30.632	4.86157	7.36827	6.43845		WBGene00017329
WBGene00016470	2	0	0	0	1	0		WBGene00016470	1	0	0	0	1	0		WBGene00016470	0	1	0	0	1	0		WBGene00016470	1	0	0	0	1	0			WBGene00015743	557.577	646.655	2321.91	1384.54	1388.77	1463.35		WBGene00017620	1921.59	1467.59	827.063	1182.98	1019.98	906.748		WBGene00017336
WBGene00219768	0	2	0	0	0	2		WBGene00219768	3	3	0	0	0	2		WBGene00219768	1	0	0	0	0	2		WBGene00219768	0	0	0	0	0	2			WBGene00015744	724.451	464.886	349.84	319.561	230.717	190.832		WBGene00017613	259.398	346.449	541.95	670.896	889.456	1074.15		WBGene00017315
WBGene00002246	0	6	7	7	13	13		WBGene00002246	0	2	8	7	13	13		WBGene00002246	1	2	11	7	13	13		WBGene00002246	49	8	6	7	13	13			WBGene00015745	1018.23	540.899	1071.13	685.754	397.941	275.848		WBGene00017621	219.578	303.24	282.757	453.746	646.303	695.352		WBGene00017314
WBGene00022260	1504	1490	398	513	704	730		WBGene00022260	988	1558	1013	513	704	730		WBGene00022260	1375	1373	183	513	704	730		WBGene00022260	1397	1085	182	513	704	730			WBGene00015742	437.668	242.358	218.819	107.663	83.1653	87.7287		WBGene00003164	1609.86	787.034	246.234	734.097	577.883	395.964		WBGene00017313
WBGene00022259	155	126	69	131	107	102		WBGene00022259	181	184	113	131	107	102		WBGene00022259	119	118	70	131	107	102		WBGene00022259	171	96	33	131	107	102			WBGene00015746	2357.21	1641.42	1141.37	561.633	409.567	342.775		WBGene00021959	1623.51	1574.07	943.7	1887.1	2208.38	1866.08		WBGene00017312
WBGene00235321	0	0	0	0	0	0		WBGene00235321	0	0	0	0	0	0		WBGene00235321	0	0	0	0	0	0		WBGene00235321	0	0	0	0	0	0			WBGene00015741	110.916	170.752	55.3801	58.2891	66.1745	68.7359		WBGene00021956	1607.58	1846.44	2756.88	3420.11	2954.68	2908.03		WBGene00017316
WBGene00022258	215	288	49	142	102	138		WBGene00022258	185	179	143	142	102	138		WBGene00022258	214	328	23	142	102	138		WBGene00022258	324	270	17	142	102	138			WBGene00001428	2187.34	5996.15	330.93	187.897	856.692	1372.91		WBGene00021960	2380.09	1696.75	1024.99	1289.94	1581.02	1539.86		WBGene00017317
WBGene00044525	19	19	5	5	6	8		WBGene00044525	3	5	4	5	6	8		WBGene00044525	5	13	0	5	6	8		WBGene00044525	12	3	0	5	6	8			WBGene00001563	288.781	335.996	2351.63	825.648	906.77	845.632		WBGene00044612	207.063	231.481	216.78	125.59	197.891	197.446		WBGene00219888
WBGene00019525	74	100	21	128	78	96		WBGene00019525	53	110	130	128	78	96		WBGene00019525	107	151	45	128	78	96		WBGene00019525	135	80	1	128	78	96			WBGene00015461	1553.82	1509.23	1206.2	797.532	741.334	600.534		WBGene00017850	87.6036	89.5059	134.309	55.0978	51.5779	74.0421		WBGene00017311
WBGene00174280	0	2	0	0	0	0		WBGene00174280	3	6	2	0	0	0		WBGene00174280	6	2	0	0	0	0		WBGene00174280	2	1	0	0	0	0			WBGene00015462	990.25	624.622	773.97	533.517	279.006	259.568		WBGene00003786	2687.27	4101.84	9429.94	8720.03	12195.5	13289		WBGene00017310
WBGene00171579	0	0	0	0	0	0		WBGene00171579	0	0	0	0	0	0		WBGene00171579	0	0	0	0	0	0		WBGene00171579	0	0	0	0	0	0			WBGene00015463	2563.06	2061.14	1992.33	1355.05	839.701	699.116		WBGene00007029	1570.04	1071.76	392.325	831.328	485.253	404.549		WBGene00015743
WBGene00202009	5	2	7	14	6	7		WBGene00202009	8	11	11	14	6	7		WBGene00202009	1	1	5	14	6	7		WBGene00202009	5	6	1	14	6	7			WBGene00015466	560.575	337.098	352.541	228.356	142.186	149.229		WBGene00020908	541.55	581.788	643.271	661.173	357.887	348.749		WBGene00015744
WBGene00195611	0	0	0	0	0	0		WBGene00195611	0	0	0	0	0	0		WBGene00195611	0	0	0	0	0	0		WBGene00195611	0	0	0	0	0	0			WBGene00015460	935.291	694.025	347.138	242.757	196.735	208.921		WBGene00044699	172.932	153.549	101.321	83.4569	70.5249	80.4806		WBGene00015745
WBGene00000168	133	171	1863	1188	1049	831		WBGene00000168	348	691	283	1188	1049	831		WBGene00000168	87	110	1779	1188	1049	831		WBGene00000168	736	333	613	1188	1049	831			WBGene00015464	486.631	696.228	1179.19	566.433	1102.61	1440.74		WBGene00003725	220.716	239.197	222.671	142.606	143.155	149.157		WBGene00015742
WBGene00019526	0	0	0	0	0	0		WBGene00019526	1	1	0	0	0	0		WBGene00019526	0	0	1	0	0	0		WBGene00019526	0	0	0	0	0	0			WBGene00015465	39.9697	14.3211	12.1566	6.17179	10.731	7.23535		WBGene00003849	51.1969	67.901	97.7867	54.2875	72.6301	103.015		WBGene00015746
WBGene00019524	1	0	0	0	0	0		WBGene00019524	0	0	0	0	0	0		WBGene00019524	0	1	1	0	0	0		WBGene00019524	0	0	0	0	0	0			WBGene00044547	21.9833	66.0976	4.0522	8.22905	4.47125	14.4707		WBGene00017331	39.8198	13.1172	17.6723	17.8257	7.36827	9.65767		WBGene00015741
WBGene00269352	0	0	0	0	0	0		WBGene00269352	0	0	0	0	0	0		WBGene00269352	0	0	0	0	0	0		WBGene00269352	0	0	0	0	0	0			WBGene00015720	12.9902	35.2521	0	2.05726	3.577	9.94861		WBGene00017332	27.305	60.185	21.2068	32.4104	33.6835	51.5076		WBGene00001428
WBGene00019527	3	4	1	2	2	1		WBGene00019527	11	7	5	2	2	1		WBGene00019527	8	4	0	2	2	1		WBGene00019527	2	3	1	2	2	1			WBGene00015718	14.9886	23.1342	2.70147	14.4008	11.6253	9.94861		WBGene00017334	25.0296	9.25923	32.9883	1.62052	6.31566	19.3153		WBGene00001563
WBGene00235094	141	22	50	59	34	12		WBGene00235094	274	163	21	59	34	12		WBGene00235094	45	51	35	59	34	12		WBGene00235094	21	170	76	59	34	12			WBGene00017231	11.9909	4.40651	18.9103	13.0293	3.577	7.23535		WBGene00001399	1505.19	474.535	546.663	225.253	452.622	581.606		WBGene00015461
WBGene00006084	0	0	8	1	4	3		WBGene00006084	2	6	0	1	4	3		WBGene00006084	2	0	4	1	4	3		WBGene00006084	0	3	0	1	4	3			WBGene00017365	39.9697	6.60976	27.0147	9.60056	0	0		WBGene00017335	72.8134	67.1294	70.6892	48.6157	131.576	126.623		WBGene00015462
WBGene00005599	0	1	0	0	0	1		WBGene00005599	4	0	0	0	0	1		WBGene00005599	1	3	0	0	0	1		WBGene00005599	6	0	0	0	0	1			WBGene00017364	279.788	103.553	129.67	914.11	138.609	187.215		WBGene00017329	195.686	87.9627	51.8387	17.8257	55.7883	27.8999		WBGene00015463
WBGene00001771	56	112	3	18	28	53		WBGene00001771	23	50	68	18	28	53		WBGene00001771	70	68	13	18	28	53		WBGene00001771	29	56	3	18	28	53			WBGene00017362	2373.2	2378.41	556.502	662.439	654.591	738.006		WBGene00017336	978.43	565.584	203.82	140.175	243.153	225.346		WBGene00015466
WBGene00005595	0	0	0	1	0	0		WBGene00005595	0	0	0	1	0	0		WBGene00005595	0	1	0	1	0	0		WBGene00005595	4	0	0	1	0	0			WBGene00017366	11.9909	31.9472	13.5073	13.0293	19.6735	20.8016		WBGene00017315	25.0296	32.4073	55.3732	31.6002	25.2626	24.6807		WBGene00015460
WBGene00202284	0	0	0	0	0	0		WBGene00202284	0	0	0	0	0	0		WBGene00202284	0	0	0	0	0	0		WBGene00202284	0	0	0	0	0	0			WBGene00015396	52.9599	45.1667	16.2088	10.2863	10.731	9.94861		WBGene00017314	17.0656	27.0061	73.0455	70.4927	95.7875	111.6		WBGene00015464
WBGene00005596	0	0	0	1	0	0		WBGene00005596	0	0	0	1	0	0		WBGene00005596	0	0	0	1	0	0		WBGene00005596	0	1	0	1	0	0			WBGene00015400	1566.81	2150.38	1465.55	648.038	1117.81	1380.14		WBGene00017313	687.176	847.219	474.796	1203.24	804.194	565.51		WBGene00015465
WBGene00020875	0	0	0	0	0	1		WBGene00020875	0	0	1	0	0	1		WBGene00020875	0	14	0	0	0	1		WBGene00020875	1	1	0	0	0	1			WBGene00015393	242.816	420.821	64.8352	85.0335	126.984	180.884		WBGene00017312	91.0167	67.1294	240.343	194.463	264.205	297.242		WBGene00044547
WBGene00006123	0	0	0	1	1	1		WBGene00006123	0	0	0	1	1	1		WBGene00006123	10	2	0	1	1	1		WBGene00006123	4	1	2	1	1	1			WBGene00005602	72.9447	81.5204	20.261	83.662	49.1838	57.8828		WBGene00017316	2282.24	1564.04	566.692	1076.84	644.197	387.38		WBGene00015720
WBGene00020877	2	0	0	1	0	0		WBGene00020877	2	1	2	1	0	0		WBGene00020877	1	1	1	1	0	0		WBGene00020877	1	1	1	1	0	0			WBGene00015402	77.9409	50.6748	35.1191	87.7765	29.5103	41.6033		WBGene00017317	890.826	1444.44	1575.19	3337.47	3574.66	3332.97		WBGene00015718
WBGene00044526	7	2	7	1	3	0		WBGene00044526	40	15	0	1	3	0		WBGene00044526	6	1	20	1	3	0		WBGene00044526	1	19	6	1	3	0			WBGene00005647	516.609	492.427	719.941	560.947	417.615	375.334		WBGene00219888	31.8559	27.0061	17.6723	0	4.21044	4.2923		WBGene00017364
WBGene00020878	13	19	1	64	20	18		WBGene00020878	43	28	33	64	20	18		WBGene00020878	67	79	7	64	20	18		WBGene00020878	61	65	2	64	20	18			WBGene00015362	152.884	256.679	28.3654	39.088	50.9723	35.2724		WBGene00017311	326.523	621.911	695.11	1582.44	1933.64	1713.7		WBGene00017362
WBGene00020874	0	0	0	0	0	0		WBGene00020874	0	0	2	0	0	0		WBGene00020874	0	0	0	0	0	0		WBGene00020874	0	0	0	0	0	0			WBGene00001789	54.9584	37.4553	25.6639	40.4595	16.0965	17.184		WBGene00017310	176.345	191.357	240.343	398.648	366.308	335.872		WBGene00017366
WBGene00020873	8	8	5	15	4	10		WBGene00020873	30	19	27	15	4	10		WBGene00020873	4	17	5	15	4	10		WBGene00020873	20	8	1	15	4	10			WBGene00020054	187.858	378.96	131.021	102.863	166.331	124.81		WBGene00015743	680.35	758.485	1187.58	1635.92	1634.7	1736.23		WBGene00015396
WBGene00020879	32	2	5	21	12	7		WBGene00020879	22	23	15	21	12	7		WBGene00020879	14	24	9	21	12	7		WBGene00020879	4	36	3	21	12	7			WBGene00017567	793.399	1126.96	262.042	191.325	750.276	482.055		WBGene00015744	1155.91	580.245	258.015	377.582	271.573	226.419		WBGene00015400
WBGene00020880	6	0	0	1	0	0		WBGene00020880	0	0	0	1	0	0		WBGene00020880	0	1	2	1	0	0		WBGene00020880	0	0	0	1	0	0			WBGene00045275	236.821	385.569	132.372	123.436	500.78	321.973		WBGene00015745	1698.6	1283.17	338.13	810.261	468.412	327.288		WBGene00015393
WBGene00020881	3	1	0	58	6	16		WBGene00020881	5	5	19	58	6	16		WBGene00020881	4	28	3	58	6	16		WBGene00020881	8	27	0	58	6	16			WBGene00045276	1104.16	1493.81	345.788	254.415	832.547	484.769		WBGene00015742	857.833	353.394	141.378	127.211	97.8927	104.088		WBGene00005602
WBGene00020872	0	0	0	7	0	1		WBGene00020872	0	1	4	7	0	1		WBGene00020872	1	0	1	7	0	1		WBGene00020872	2	0	0	7	0	1			WBGene00017565	1013.23	725.972	463.302	766.673	607.196	511.901		WBGene00015746	4621.37	1722.22	897.752	663.604	482.095	406.695		WBGene00015402
WBGene00020882	0	0	0	3	0	1		WBGene00020882	0	0	0	3	0	1		WBGene00020882	0	2	1	3	0	1		WBGene00020882	4	0	0	3	0	1			WBGene00017789	565.571	485.817	651.053	994.344	881.731	671.984		WBGene00015741	136.525	101.851	128.419	68.8722	77.8932	81.5536		WBGene00005647
WBGene00020871	0	0	0	0	0	0		WBGene00020871	0	0	0	0	0	0		WBGene00020871	0	0	0	0	0	0		WBGene00020871	0	0	0	0	0	0			WBGene00017792	71.9455	82.622	32.4176	32.2304	18.7793	20.8016		WBGene00001428	1002.32	1259.25	3027.85	222.012	1008.4	1628.93		WBGene00015362
WBGene00167221	0	0	0	0	0	0		WBGene00167221	0	0	0	0	0	0		WBGene00167221	0	0	0	0	0	0		WBGene00167221	0	0	0	0	0	0			WBGene00017787	4.99621	5.50813	6.75367	19.8869	10.731	9.94861		WBGene00001563	500.592	557.097	471.261	975.554	1067.35	1003.32		WBGene00001789
WBGene00020870	0	0	0	3	0	0		WBGene00020870	0	0	0	3	0	0		WBGene00020870	0	1	2	3	0	0		WBGene00020870	3	1	2	3	0	0			WBGene00017786	154.883	189.48	98.6035	91.2053	69.7515	73.258		WBGene00015461	2514.34	1695.98	799.966	942.334	872.614	712.521		WBGene00020054
WBGene00020883	325	350	54	89	73	62		WBGene00020883	404	259	138	89	73	62		WBGene00020883	227	268	76	89	73	62		WBGene00020883	174	353	58	89	73	62			WBGene00017785	17.9864	7.71139	2.70147	29.4874	14.308	19.8972		WBGene00015462	1722.49	1189.04	518.387	630.383	328.414	307.972		WBGene00017567
WBGene00020869	155	160	31	259	115	202		WBGene00020869	189	186	202	259	115	202		WBGene00020869	248	346	72	259	115	202		WBGene00020869	335	286	24	259	115	202			WBGene00017783	65.95	208.207	8.1044	11.6578	33.9815	84.111		WBGene00015463	3886.41	2896.59	1106.29	1601.08	988.401	829.486		WBGene00045275
WBGene00269355	0	1	0	4	10	6		WBGene00269355	10	8	6	4	10	6		WBGene00269355	6	8	7	4	10	6		WBGene00269355	7	7	1	4	10	6			WBGene00017782	108.917	127.789	533.54	266.073	217.303	317.451		WBGene00015466	992.082	530.091	166.12	269.817	167.365	177.057		WBGene00045276
WBGene00006127	0	0	0	1	2	1		WBGene00006127	0	0	5	1	2	1		WBGene00006127	0	0	0	1	2	1		WBGene00006127	1	0	0	1	2	1			WBGene00016926	28.978	26.439	12.1566	15.0866	26.8275	21.7061		WBGene00015460	1352.74	562.498	338.13	286.832	231.574	247.88		WBGene00005825
WBGene00018055	5	1	3	45	32	27		WBGene00018055	47	33	2	45	32	27		WBGene00018055	54	38	21	45	32	27		WBGene00018055	37	50	8	45	32	27			WBGene00016928	12.9902	14.3211	5.40293	11.6578	8.9425	13.5663		WBGene00015464	525.622	711.417	1327.78	669.276	1297.87	1709.41		WBGene00017565
WBGene00018057	0	0	0	0	1	0		WBGene00018057	0	0	0	0	1	0		WBGene00018057	1	0	0	0	1	0		WBGene00018057	0	1	0	0	1	0			WBGene00016924	29.9773	16.5244	14.8581	8.9148	15.2023	13.5663		WBGene00015465	30.7181	37.0369	10.6034	7.29235	12.6313	8.58459		WBGene00017789
WBGene00018056	38	36	8	7	8	26		WBGene00018056	49	38	43	7	8	26		WBGene00018056	39	39	11	7	8	26		WBGene00018056	57	38	4	7	8	26			WBGene00016923	6.9947	2.20325	2.70147	29.4874	12.5195	2.71326		WBGene00015718	1.13771	3.08641	29.4538	17.0155	13.6839	11.8038		WBGene00017792
WBGene00018054	11	30	7	5	16	12		WBGene00018054	39	15	16	5	16	12		WBGene00018054	30	36	10	5	16	12		WBGene00018054	37	14	5	5	16	12			WBGene00016921	79.9394	170.752	4.0522	7.5433	35.77	69.6403		WBGene00017365	78.5019	20.8333	0	11.3437	0	0		WBGene00017787
WBGene00170353	0	0	0	0	0	0		WBGene00170353	0	0	0	0	0	0		WBGene00170353	0	0	0	0	0	0		WBGene00170353	0	0	0	0	0	0			WBGene00016929	24.9811	9.91464	5.40293	26.7444	0	4.5221		WBGene00017364	765.678	394.289	586.72	1080.08	163.155	222.126		WBGene00017786
WBGene00269374	0	0	0	0	0	0		WBGene00269374	1	0	0	0	0	0		WBGene00269374	0	0	0	0	0	0		WBGene00269374	1	0	0	0	0	0			WBGene00003731	469.644	453.87	239.08	351.106	306.728	331.922		WBGene00017363	34.1313	16.2036	11.7815	1.62052	4.21044	4.2923		WBGene00017785
WBGene00269375	0	9	0	4	1	6		WBGene00269375	6	8	11	4	1	6		WBGene00269375	1	10	8	4	1	6		WBGene00269375	2	16	3	4	1	6			WBGene00001500	133.899	103.553	32.4176	131.665	74.2228	90.4419		WBGene00017362	2504.1	1529.32	2893.54	782.712	770.511	875.629		WBGene00017783
WBGene00006013	0	0	0	0	0	0		WBGene00006013	0	0	0	0	0	0		WBGene00006013	0	0	0	0	0	0		WBGene00006013	0	0	0	0	0	0			WBGene00017599	329.75	278.712	162.088	98.0628	156.494	107.626		WBGene00017366	10.2394	17.7469	30.632	15.395	23.1574	24.6807		WBGene00017782
WBGene00018058	2	0	0	1	0	0		WBGene00018058	0	0	0	1	0	0		WBGene00018058	2	0	0	1	0	0		WBGene00018058	1	0	0	1	0	0			WBGene00017600	484.633	354.724	132.372	133.722	130.561	117.575		WBGene00015396	50.0592	39.3517	16.4941	12.1539	12.6313	11.8038		WBGene00016926
WBGene00018059	2	0	0	0	2	0		WBGene00018059	3	0	0	0	2	0		WBGene00018059	1	1	0	0	2	0		WBGene00018059	0	0	0	0	2	0			WBGene00219905	84.9356	80.4188	33.7683	39.088	44.7125	40.6989		WBGene00015400	2846.55	1097.22	1300.68	765.697	1315.76	1637.51		WBGene00016928
WBGene00219257	0	0	0	0	0	0		WBGene00219257	0	0	0	0	0	0		WBGene00219257	0	0	0	0	0	0		WBGene00219257	0	0	0	0	0	0			WBGene00017605	509.614	614.708	922.551	961.427	735.968	520.946		WBGene00015393	211.614	171.296	201.464	100.472	149.471	214.615		WBGene00016924
WBGene00018053	0	0	0	0	1	0		WBGene00018053	3	0	3	0	1	0		WBGene00018053	1	0	4	0	1	0		WBGene00018053	0	0	0	0	1	0			WBGene00017608	265.799	275.407	891.484	681.64	399.73	434.121		WBGene00005602	56.8855	66.3578	51.8387	98.8519	57.8936	68.6767		WBGene00016923
WBGene00018060	19	20	91	96	126	211		WBGene00018060	22	46	112	96	126	211		WBGene00018060	51	40	75	96	126	211		WBGene00018060	206	37	42	96	126	211			WBGene00017606	108.917	166.346	721.292	424.482	364.854	363.577		WBGene00015402	128.561	87.9627	97.7867	103.713	34.7361	49.3614		WBGene00016921
WBGene00018061	22	36	105	105	86	130		WBGene00018061	20	52	82	105	86	130		WBGene00018061	29	21	106	105	86	130		WBGene00018061	154	51	37	105	86	130			WBGene00017607	269.796	301.846	1014.4	674.782	527.608	355.437		WBGene00005647	771.367	702.93	520.744	662.794	491.569	445.326		WBGene00016929
WBGene00018052	157	72	75	321	97	174		WBGene00018052	210	224	155	321	97	174		WBGene00018052	86	128	75	321	97	174		WBGene00018052	109	162	43	321	97	174			WBGene00016816	73.944	101.35	907.693	490.314	372.008	306.598		WBGene00015362	171.794	119.598	90.7178	46.1849	59.9988	41.8499		WBGene00003731
WBGene00018062	3	2	3	11	14	13		WBGene00018062	5	7	5	11	14	13		WBGene00018062	7	2	2	11	14	13		WBGene00018062	36	9	4	11	14	13			WBGene00016817	114.913	200.496	47.2757	69.2612	124.301	199.877		WBGene00001789	97.843	44.7529	21.2068	47.8054	18.947	20.3884		WBGene00001500
WBGene00018063	2	0	0	8	1	1		WBGene00018063	3	0	0	8	1	1		WBGene00018063	1	3	1	8	1	1		WBGene00018063	7	3	0	8	1	1			WBGene00016822	524.602	103.553	316.072	168.696	93.8963	47.0298		WBGene00020054	317.421	193.672	186.148	121.539	195.785	148.084		WBGene00017599
WBGene00194898	0	0	0	1	2	1		WBGene00194898	0	0	0	1	2	1		WBGene00194898	0	2	1	1	2	1		WBGene00194898	11	1	0	1	2	1			WBGene00016823	33.9743	13.2195	205.311	75.433	33.0873	22.6105		WBGene00017567	1269.68	648.146	288.647	226.063	883.14	571.949		WBGene00017600
WBGene00015882	3	4	0	4	7	8		WBGene00015882	0	5	0	4	7	8		WBGene00015882	5	11	1	4	7	8		WBGene00015882	20	7	1	4	7	8			WBGene00016824	8.99318	2.20325	285.005	102.863	52.7608	21.7061		WBGene00045275	543.825	416.665	167.298	145.847	589.462	382.014		WBGene00219905
WBGene00015883	2	2	0	6	0	2		WBGene00015883	3	8	3	6	0	2		WBGene00015883	1	7	0	6	0	2		WBGene00015883	5	1	2	6	0	2			WBGene00017201	40.969	41.8618	120.215	41.831	64.386	80.4933		WBGene00045276	1505.19	952.157	386.434	300.607	979.98	575.168		WBGene00017605
WBGene00015879	6	18	6	12	6	15		WBGene00015879	21	19	29	12	6	15		WBGene00015879	25	21	11	12	6	15		WBGene00015879	22	26	4	12	6	15			WBGene00017205	68.9477	7.71139	5.40293	482.771	16.9908	83.2066		WBGene00005825	12.5148	23.1481	10.6034	9.72313	7.36827	8.58459		WBGene00017608
WBGene00015878	1	1	0	69	13	41		WBGene00015878	18	11	28	69	13	41		WBGene00015878	16	63	8	69	13	41		WBGene00015878	4	47	4	69	13	41			WBGene00015709	245.814	248.968	212.065	163.209	152.917	187.215		WBGene00017565	1575.73	1006.94	778.759	905.872	714.722	607.36		WBGene00017606
WBGene00015884	0	0	0	35	3	11		WBGene00015884	1	4	10	35	3	11		WBGene00015884	0	9	3	35	3	11		WBGene00015884	5	3	0	35	3	11			WBGene00003684	82.9371	85.9269	18.9103	51.4316	52.7608	55.1696		WBGene00017789	790.708	1183.64	1324.24	1174.88	1037.87	797.294		WBGene00017607
WBGene00015877	1	1	0	1	1	1		WBGene00015877	1	4	0	1	1	1		WBGene00015877	8	10	0	1	1	1		WBGene00015877	9	1	0	1	1	1			WBGene00015705	31.9758	27.5407	12.1566	43.2025	17.885	28.9414		WBGene00017792	60.2986	70.9874	63.6203	38.0823	22.1048	24.6807		WBGene00016816
WBGene00015885	394	352	79	83	72	83		WBGene00015885	466	271	118	83	72	83		WBGene00015885	313	280	72	83	72	83		WBGene00015885	147	466	85	83	72	83			WBGene00015710	219.833	370.147	68.8874	63.0894	79.5883	66.0226		WBGene00017787	1.13771	5.40122	7.06892	23.4976	12.6313	11.8038		WBGene00016817
WBGene00015876	7	6	0	1	3	4		WBGene00015876	0	8	11	1	3	4		WBGene00015876	3	12	0	1	3	4		WBGene00015876	6	3	0	1	3	4			WBGene00015711	17.9864	51.7765	8.1044	6.85754	2.68275	3.61768		WBGene00017786	274.188	216.049	213.246	107.765	82.1036	86.919		WBGene00016822
WBGene00268213	4	2	0	2	4	1		WBGene00268213	0	1	1	2	4	1		WBGene00268213	1	8	0	2	4	1		WBGene00268213	8	1	0	2	4	1			WBGene00022654	52.9599	128.89	21.6117	38.4022	56.3378	47.9342		WBGene00017785	6.82625	8.48762	22.3849	34.8412	16.8418	23.6076		WBGene00016823
WBGene00006126	1	1	0	0	0	0		WBGene00006126	0	1	1	0	0	0		WBGene00006126	0	0	0	0	0	0		WBGene00006126	0	2	0	0	0	0			WBGene00235114	56.9568	72.7074	13.5073	11.6578	15.2023	19.8972		WBGene00017783	28.4427	48.6109	215.602	13.7744	39.9992	99.7959		WBGene00016824
WBGene00015886	0	0	0	0	0	0		WBGene00015886	0	2	0	0	0	0		WBGene00015886	0	0	0	0	0	0		WBGene00015886	7	1	0	0	0	0			WBGene00022653	1879.58	929.773	602.427	669.982	373.797	270.421		WBGene00017782	209.338	192.129	216.78	314.381	255.784	376.649		WBGene00017201
WBGene00015436	1	4	0	0	0	1		WBGene00015436	1	2	0	0	0	1		WBGene00015436	0	3	1	0	0	1		WBGene00015436	2	0	0	0	0	1			WBGene00235113	29.9773	57.2846	9.45513	13.7151	7.154	12.6619		WBGene00016927	15.9279	10.0308	1.17815	14.5847	5.26305	12.8769		WBGene00017205
WBGene00015437	24	11	14	21	20	21		WBGene00015437	36	17	20	21	20	21		WBGene00015437	11	26	15	21	20	21		WBGene00015437	22	20	2	21	20	21			WBGene00022657	16.9871	36.3537	5.40293	4.80028	6.25975	14.4707		WBGene00016926	31.8559	23.1481	12.9597	17.8257	31.5783	25.7538		WBGene00015706
WBGene00015435	7	6	2	3	7	4		WBGene00015435	33	15	9	3	7	4		WBGene00015435	26	17	5	3	7	4		WBGene00015435	6	16	0	3	7	4			WBGene00022410	213.838	605.895	740.202	996.401	1770.62	2011.43		WBGene00016928	7.96396	13.1172	29.4538	13.7744	10.5261	16.0961		WBGene00015709
WBGene00015434	170	91	174	432	148	199		WBGene00015434	287	286	220	432	148	199		WBGene00015434	139	212	178	432	148	199		WBGene00015434	203	339	72	432	148	199			WBGene00044342	37.9712	24.2358	2.70147	4.11453	10.731	7.23535		WBGene00016924	28.4427	21.6049	31.8101	10.5334	17.8944	16.0961		WBGene00003684
WBGene00015433	47	27	7	84	60	50		WBGene00015433	79	85	58	84	60	50		WBGene00015433	80	102	39	84	60	50		WBGene00015433	76	93	20	84	60	50			WBGene00020246	405.693	719.362	2651.49	1444.88	1765.25	1902.9		WBGene00016923	12.5148	6.94442	34.1664	34.8412	14.7365	3.21922		WBGene00015705
WBGene00006012	0	0	0	0	0	0		WBGene00006012	0	0	0	0	0	0		WBGene00006012	0	0	0	0	0	0		WBGene00006012	0	0	0	0	0	0			WBGene00020245	308.766	331.59	193.155	170.067	240.553	464.872		WBGene00016921	5.68855	41.6665	156.694	8.91287	42.1044	82.6267		WBGene00015710
WBGene00015438	0	0	0	0	0	0		WBGene00015438	0	0	0	0	0	0		WBGene00015438	0	0	0	0	0	0		WBGene00015438	0	0	0	0	0	0			WBGene00020247	571.567	232.443	302.564	135.779	101.945	45.221		WBGene00016929	29.5804	28.5493	11.7815	31.6002	0	5.36537		WBGene00015711
WBGene00015439	0	1	0	1	1	1		WBGene00015439	2	1	0	1	1	1		WBGene00015439	0	0	2	1	1	1		WBGene00015439	0	0	1	1	1	1			WBGene00016150	570.568	305.151	399.817	405.966	259.333	235.149		WBGene00003731	555.202	526.233	362.871	414.854	361.045	393.818		WBGene00022654
WBGene00219256	0	0	0	0	0	0		WBGene00219256	0	0	0	0	0	0		WBGene00219256	0	0	0	0	0	0		WBGene00219256	0	0	0	0	0	0			WBGene00016149	18.9856	16.5244	13.5073	8.9148	8.9425	17.184		WBGene00001500	160.417	75.617	189.683	155.57	87.3666	107.307		WBGene00235114
WBGene00015432	0	0	0	0	0	0		WBGene00015432	0	0	0	0	0	0		WBGene00015432	0	0	0	0	0	0		WBGene00015432	3	0	0	0	0	0			WBGene00001719	381.711	817.407	62.1337	87.7765	199.418	328.304		WBGene00017599	309.457	206.018	226.205	115.867	184.207	127.696		WBGene00022653
WBGene00015440	19	9	18	49	23	39		WBGene00015440	6	26	38	49	23	39		WBGene00015440	9	26	23	49	23	39		WBGene00015440	49	20	11	49	23	39			WBGene00004453	24982.1	20106.9	9745.54	14173.9	18414.4	15882.5		WBGene00017600	642.806	387.344	614.996	158.001	153.681	139.5		WBGene00235113
WBGene00015441	6	3	8	33	26	24		WBGene00015441	5	10	21	33	26	24		WBGene00015441	5	5	5	33	26	24		WBGene00015441	31	6	1	33	26	24			WBGene00004499	3283.51	6723.23	27072.7	27673.6	36866.4	34746.9		WBGene00219905	128.561	91.8207	111.925	46.1849	52.6305	48.2883		WBGene00022657
WBGene00020619	17	12	0	13	8	3		WBGene00020619	22	10	22	13	8	3		WBGene00020619	13	12	2	13	8	3		WBGene00020619	3	14	0	13	8	3			WBGene00016148	2030.46	1573.12	798.283	525.973	421.192	327.4		WBGene00017605	954.538	1050.92	461.836	1135.99	866.298	618.091		WBGene00022410
WBGene00020620	3	6	1	3	1	13		WBGene00020620	4	1	4	3	1	13		WBGene00020620	2	7	0	3	1	13		WBGene00020620	22	5	1	3	1	13			WBGene00016147	188.857	312.862	105.357	174.182	209.255	138.376		WBGene00017608	483.526	396.604	359.337	805.4	470.517	515.076		WBGene00044342
WBGene00020622	2	2	0	1	0	0		WBGene00020622	0	1	0	1	0	0		WBGene00020622	0	2	0	1	0	0		WBGene00020622	2	0	0	1	0	0			WBGene00016146	67.9485	280.915	148.581	283.216	1140.17	984.913		WBGene00017606	203.65	243.055	199.108	501.552	429.465	431.376		WBGene00020246
WBGene00020618	0	2	0	7	3	8		WBGene00020618	1	8	16	7	3	8		WBGene00020618	3	6	1	7	3	8		WBGene00020618	14	5	0	7	3	8			WBGene00001464	38.9705	39.6586	64.8352	95.3198	98.3675	162.795		WBGene00017607	556.34	554.782	431.204	797.297	621.04	421.718		WBGene00020245
WBGene00020617	55	54	4	81	34	97		WBGene00020617	56	86	199	81	34	97		WBGene00020617	95	265	12	81	34	97		WBGene00020617	101	112	10	81	34	97			WBGene00194921	50.9614	46.2683	6.75367	13.0293	28.616	26.2282		WBGene00016816	171.794	225.308	161.407	579.337	437.886	363.772		WBGene00020247
WBGene00020616	49	59	3	68	38	51		WBGene00020616	60	56	105	68	38	51		WBGene00020616	181	188	10	68	38	51		WBGene00020616	172	154	6	68	38	51			WBGene00022812	388.705	287.525	349.84	222.184	126.984	109.435		WBGene00016817	56.8855	79.475	302.785	81.8364	146.313	237.149		WBGene00016150
WBGene00044718	12	12	0	1	7	10		WBGene00044718	1	5	15	1	7	10		WBGene00044718	9	27	1	1	7	10		WBGene00044718	12	5	0	1	7	10			WBGene00002078	1047.21	1110.44	10333.1	4196.82	4653.68	5096.4		WBGene00016822	873.761	318.672	9.42522	199.324	110.524	55.7999		WBGene00016149
WBGene00020615	34	45	2	22	12	15		WBGene00020615	10	26	20	22	12	15		WBGene00020615	37	73	8	22	12	15		WBGene00020615	35	28	0	22	12	15			WBGene00022813	358.728	489.122	498.421	91.2053	180.639	174.553		WBGene00016823	110.358	83.333	1.17815	89.1287	38.9466	26.8269		WBGene00001719
WBGene00020614	7	2	0	4	0	3		WBGene00020614	0	6	3	4	0	3		WBGene00020614	6	8	0	4	0	3		WBGene00020614	8	2	0	4	0	3			WBGene00022814	65.95	25.3374	217.468	141.265	73.3285	85.9198		WBGene00016824	17.0656	33.1789	3.53446	121.539	62.104	25.7538		WBGene00004453
WBGene00020613	5	6	0	4	13	8		WBGene00020613	11	14	11	4	13	8		WBGene00020613	13	4	3	4	13	8		WBGene00020613	14	10	0	4	13	8			WBGene00045277	45.9652	48.4716	22.9625	19.2011	36.6643	31.6547		WBGene00017201	21.6165	66.3578	118.993	49.4259	75.7879	95.5036		WBGene00004499
WBGene00020612	5	18	35	59	110	121		WBGene00020612	17	58	58	59	110	121		WBGene00020612	27	34	38	59	110	121		WBGene00020612	139	35	18	59	110	121			WBGene00002256	1637.76	1466.27	498.421	301.732	265.592	268.613		WBGene00017205	186.584	81.0182	137.844	570.424	19.9996	98.7228		WBGene00016148
WBGene00020611	76	77	28	89	37	16		WBGene00020611	137	133	41	89	37	16		WBGene00020611	79	62	7	89	37	16		WBGene00020611	52	166	24	89	37	16			WBGene00003242	3021.71	6465.45	28762.5	9679.42	23200.4	23668.7		WBGene00015706	3.41313	6.94442	27.0975	11.3437	9.47349	19.3153		WBGene00016147
WBGene00020609	29	9	8	18	14	9		WBGene00020609	45	61	22	18	14	9		WBGene00020609	33	13	2	18	14	9		WBGene00020609	16	60	3	18	14	9			WBGene00016499	123.906	93.6383	44.5742	67.8897	50.9723	54.2652		WBGene00015709	347.001	286.264	285.113	192.842	179.996	222.126		WBGene00016146
WBGene00020623	0	0	0	0	0	0		WBGene00020623	4	0	0	0	0	0		WBGene00020623	0	0	0	0	0	0		WBGene00020623	0	1	0	0	0	0			WBGene00016505	1115.15	977.143	237.729	372.365	363.96	272.23		WBGene00003684	83.0528	64.8146	77.7581	60.7696	62.104	65.4575		WBGene00001464
WBGene00020608	1	0	0	0	0	0		WBGene00020608	0	0	2	0	0	0		WBGene00020608	0	1	0	0	0	0		WBGene00020608	0	0	0	0	0	0			WBGene00016504	103.921	51.7765	17.5595	52.1173	33.9815	32.5591		WBGene00015705	43.2329	31.6357	38.879	51.0465	21.0522	34.3384		WBGene00194921
WBGene00020607	8	11	0	3	0	0		WBGene00020607	2	4	2	3	0	0		WBGene00020607	7	8	0	3	0	0		WBGene00020607	1	3	3	3	0	0			WBGene00016500	337.744	312.862	324.176	822.219	450.702	546.269		WBGene00015710	191.135	185.956	109.568	74.544	93.6823	78.3344		WBGene00022812
WBGene00020624	0	0	0	0	0	0		WBGene00020624	2	4	0	0	0	0		WBGene00020624	2	3	3	0	0	0		WBGene00020624	2	9	0	0	0	0			WBGene00016501	1833.61	755.716	1785.67	1172.64	564.272	422.364		WBGene00015711	35.269	8.48762	23.5631	8.10261	3.15783	4.2923		WBGene00195454
WBGene00005597	0	0	0	0	0	0		WBGene00005597	0	0	0	0	0	0		WBGene00005597	0	0	2	0	0	0		WBGene00005597	0	1	7	0	0	0			WBGene00219659	65.95	72.7074	29.7161	15.7723	25.9333	36.1768		WBGene00022654	44.3707	52.469	94.2522	45.3746	66.3144	56.8729		WBGene00002078
WBGene00000478	18	36	32	33	77	100		WBGene00000478	10	26	62	33	77	100		WBGene00000478	27	30	35	33	77	100		WBGene00000478	112	20	25	33	77	100			WBGene00016496	1116.15	1427.71	4957.19	2956.97	3272.06	3581.5		WBGene00235114	31.8559	20.0617	56.5513	13.7744	17.8944	23.6076		WBGene00022813
WBGene00174026	0	0	0	0	0	0		WBGene00174026	0	0	0	0	0	0		WBGene00174026	0	0	0	0	0	0		WBGene00174026	0	0	0	0	0	0			WBGene00016495	583.558	528.781	598.375	484.142	279.006	243.289		WBGene00022653	5369.99	2094.13	1081.54	791.625	439.991	320.849		WBGene00022814
WBGene00195825	0	3	0	0	0	0		WBGene00195825	3	2	0	0	0	0		WBGene00195825	0	1	0	0	0	0		WBGene00195825	1	3	0	0	0	0			WBGene00016503	29.9773	22.0325	6.75367	7.5433	6.25975	9.04419		WBGene00235113	60.2986	57.0986	37.7009	16.2052	8.42088	15.023		WBGene00045277
WBGene00023017	0	1	0	0	1	0		WBGene00023017	0	0	0	0	1	0		WBGene00023017	0	1	0	0	1	0		WBGene00023017	1	0	0	0	1	0			WBGene00077712	37.9712	45.1667	105.357	61.7179	83.1653	93.1552		WBGene00022657	22.7542	16.9752	8.24707	5.67183	7.36827	17.1692		WBGene00002256
WBGene00017868	54	53	47	130	68	82		WBGene00017868	61	108	94	130	68	82		WBGene00017868	76	89	42	130	68	82		WBGene00017868	79	82	8	130	68	82			WBGene00018219	32.975	44.0651	2.70147	4.11453	11.6253	9.04419		WBGene00022410	199.099	428.239	1246.49	1177.31	2084.17	2386.52		WBGene00003242
WBGene00167632	1	0	0	0	0	0		WBGene00167632	5	6	0	0	0	0		WBGene00167632	0	0	0	0	0	0		WBGene00167632	1	2	0	0	0	0			WBGene00018218	1046.21	1243.74	1704.63	1455.86	2054.09	2173.32		WBGene00044342	22.7542	10.0308	32.9883	4.86157	12.6313	8.58459		WBGene00016499
WBGene00017867	155	97	75	297	184	142		WBGene00017867	170	245	181	297	184	142		WBGene00017867	259	266	82	297	184	142		WBGene00017867	113	157	21	297	184	142			WBGene00018217	725.45	386.671	551.099	255.101	118.041	254.142		WBGene00020246	856.695	1136.57	1374.9	1707.22	2077.85	2257.75		WBGene00016505
WBGene00001781	49	54	21	60	36	57		WBGene00001781	59	146	77	60	36	57		WBGene00001781	69	101	13	60	36	57		WBGene00001781	80	40	8	60	36	57			WBGene00018216	348.736	417.517	217.468	297.617	295.997	331.922		WBGene00020245	209.338	277.005	647.984	200.945	283.152	551.56		WBGene00016504
WBGene00015315	0	0	0	0	0	0		WBGene00015315	0	0	0	0	0	0		WBGene00015315	0	0	0	0	0	0		WBGene00015315	0	0	0	0	0	0			WBGene00018221	560.575	689.618	701.031	737.871	838.807	807.646		WBGene00020247	1265.13	481.48	104.856	160.432	119.998	53.6537		WBGene00016500
WBGene00044088	0	0	0	0	1	3		WBGene00044088	0	1	0	0	1	3		WBGene00044088	1	0	0	0	1	3		WBGene00044088	1	2	0	0	1	3			WBGene00018222	37.9712	52.8781	49.9771	91.2053	93.002	84.111		WBGene00016150	1015.97	593.362	315.745	479.675	305.257	278.999		WBGene00016501
WBGene00044089	0	0	0	0	0	0		WBGene00044089	0	1	0	0	0	0		WBGene00044089	0	0	0	0	0	0		WBGene00044089	0	0	0	0	0	0			WBGene00003575	5.99546	8.81301	5.40293	30.1732	26.8275	2.71326		WBGene00016149	29.5804	12.3456	40.0572	10.5334	10.5261	20.3884		WBGene00219659
WBGene00015316	0	0	0	0	0	0		WBGene00015316	0	0	0	0	0	0		WBGene00015316	0	0	0	0	0	0		WBGene00015316	0	0	0	0	0	0			WBGene00045392	173.868	176.26	41.8727	32.9162	41.1355	52.4563		WBGene00001719	170.656	202.16	1933.35	103.713	234.732	389.526		WBGene00016496
WBGene00003096	397	594	1061	3852	2343	3878		WBGene00003096	1720	2640	3518	3852	2343	3878		WBGene00003096	623	1771	3490	3852	2343	3878		WBGene00003096	1776	1505	1362	3852	2343	3878			WBGene00017823	64.9508	42.9634	55.3801	74.0615	30.4045	32.5591		WBGene00004453	31636.3	15866.5	9604.3	16747.3	21675.3	18844.3		WBGene00016495
WBGene00044090	2	7	1	1	3	1		WBGene00044090	0	1	10	1	3	1		WBGene00044090	12	14	2	1	3	1		WBGene00044090	5	4	0	1	3	1			WBGene00017819	23.9818	92.5366	1.35073	3.42877	15.2023	32.5591		WBGene00004499	6197.1	14252.3	16707.4	32698.1	43394.9	41226.4		WBGene00016503
WBGene00015317	1	0	0	0	0	0		WBGene00015317	0	0	0	0	0	0		WBGene00015317	0	0	0	0	0	0		WBGene00015317	0	0	0	0	0	0			WBGene00000488	27.9788	26.439	21.6117	30.1732	20.5678	24.4193		WBGene00016148	3533.72	1581.01	279.222	621.47	495.779	388.453		WBGene00077712
WBGene00015318	0	0	0	0	0	0		WBGene00015318	0	0	0	0	0	0		WBGene00015318	0	0	0	0	0	0		WBGene00015318	0	0	0	0	0	0			WBGene00002632	277.789	394.382	790.179	568.49	594.677	733.484		WBGene00016147	93.2922	266.203	339.308	205.806	246.311	164.18		WBGene00018219
WBGene00015575	3	0	0	0	0	0		WBGene00015575	0	0	1	0	0	0		WBGene00015575	0	0	0	0	0	0		WBGene00015575	0	1	0	0	0	0			WBGene00017818	344.739	199.394	220.17	193.383	167.225	155.56		WBGene00016146	46.6461	234.567	614.996	334.638	1342.08	1168.58		WBGene00018218
WBGene00269378	3	6	0	0	9	1		WBGene00269378	2	3	2	0	9	1		WBGene00269378	11	15	1	0	9	1		WBGene00269378	2	1	1	0	9	1			WBGene00022394	2055.44	1338.48	678.068	482.085	484.684	471.202		WBGene00001464	19.3411	45.5245	104.856	112.626	115.787	193.153		WBGene00018217
WBGene00015576	11	11	8	1	0	5		WBGene00015576	16	11	6	1	0	5		WBGene00015576	10	21	8	1	0	5		WBGene00015576	5	10	1	1	0	5			WBGene00022393	3540.32	2509.51	1685.72	1579.98	1178.62	1152.23		WBGene00194921	27.305	18.5185	76.5799	15.395	33.6835	31.1192		WBGene00018216
WBGene00015578	2	2	1	2	2	1		WBGene00015578	1	4	4	2	2	1		WBGene00015578	0	0	2	2	2	1		WBGene00015578	6	0	0	2	2	1			WBGene00022397	49.9621	122.281	105.357	68.5754	109.993	133.854		WBGene00022812	741.786	411.264	162.585	262.525	149.471	129.842		WBGene00018221
WBGene00015577	619	512	698	579	526	542		WBGene00015577	611	1167	366	579	526	542		WBGene00015577	575	459	700	579	526	542		WBGene00015577	623	611	238	579	526	542			WBGene00022396	138.895	201.598	64.8352	147.437	163.648	111.244		WBGene00195454	13.6525	20.0617	15.316	12.1539	11.5787	11.8038		WBGene00018222
WBGene00006256	2	0	0	0	0	0		WBGene00006256	0	0	2	0	0	0		WBGene00006256	0	1	1	0	0	0		WBGene00006256	2	0	0	0	0	0			WBGene00044552	29.9773	39.6586	2.70147	15.7723	20.5678	24.4193		WBGene00002078	1699.74	2020.05	2761.59	4958.8	5477.78	6046.77		WBGene00003575
WBGene00006259	0	0	0	0	0	0		WBGene00006259	0	0	0	0	0	0		WBGene00006259	0	0	0	0	0	0		WBGene00006259	0	0	0	0	0	0			WBGene00022398	1546.83	944.094	594.323	453.284	264.698	166.413		WBGene00022813	258.26	333.332	117.815	107.765	212.627	207.103		WBGene00045392
WBGene00006257	0	0	0	0	0	0		WBGene00006257	0	0	0	0	0	0		WBGene00006257	0	0	0	0	0	0		WBGene00006257	0	0	0	0	0	0			WBGene00022399	1247.05	768.935	886.081	591.806	414.932	308.407		WBGene00022814	63.7117	110.339	77.7581	166.914	86.314	101.942		WBGene00017823
WBGene00168557	0	0	0	0	0	0		WBGene00168557	0	0	0	0	0	0		WBGene00168557	0	0	0	0	0	0		WBGene00168557	0	0	0	0	0	0			WBGene00022402	2004.48	1205.18	823.947	813.304	691.256	656.608		WBGene00045277	46.6461	30.8641	47.1261	22.6873	43.157	37.5576		WBGene00017819
WBGene00006258	9	3	1	2	1	6		WBGene00006258	8	6	2	2	1	6		WBGene00006258	1	2	6	2	1	6		WBGene00006258	5	7	1	2	1	6			WBGene00022400	1601.79	989.261	694.277	484.828	428.346	428.695		WBGene00002256	2540.5	1057.1	633.846	356.515	312.625	318.703		WBGene00000488
WBGene00196310	0	0	0	0	0	0		WBGene00196310	0	0	0	0	0	0		WBGene00196310	0	0	0	0	0	0		WBGene00196310	0	0	0	0	0	0			WBGene00022401	3068.67	2700.09	1542.54	1243.27	989.041	814.882		WBGene00003242	3193.55	5317.88	13671.3	11436.8	27308.9	28082.4		WBGene00002632
WBGene00044119	0	0	0	0	3	0		WBGene00044119	0	0	0	0	3	0		WBGene00044119	3	1	0	0	3	0		WBGene00044119	0	1	0	0	3	0			WBGene00018398	2325.24	2294.69	1141.37	283.216	742.228	714.491		WBGene00016499	177.483	119.598	176.723	80.2159	59.9988	64.3845		WBGene00017818
WBGene00015574	58	80	18	15	15	22		WBGene00015574	69	89	58	15	15	22		WBGene00015574	125	106	17	15	15	22		WBGene00015574	53	56	4	15	15	22			WBGene00001152	342.74	419.72	137.775	117.95	101.945	109.435		WBGene00016505	827.115	657.405	360.515	439.972	428.412	322.995		WBGene00022394
WBGene00020747	4	3	0	0	0	2		WBGene00020747	1	3	6	0	0	2		WBGene00020747	3	16	0	0	0	2		WBGene00020747	2	5	0	0	0	2			WBGene00018399	326.752	196.09	445.742	258.529	176.167	130.236		WBGene00016504	108.082	60.9566	53.0169	61.5798	39.9992	38.6307		WBGene00022393
WBGene00006286	2	4	0	1	2	2		WBGene00006286	0	11	1	1	2	2		WBGene00006286	10	8	1	1	2	2		WBGene00006286	2	5	0	1	2	2			WBGene00018400	917.305	404.297	495.719	157.723	179.744	144.707		WBGene00016500	416.402	307.869	927.206	971.503	530.516	648.137		WBGene00022397
WBGene00020746	0	0	0	1	2	4		WBGene00020746	1	0	1	1	2	4		WBGene00020746	0	0	0	1	2	4		WBGene00020746	2	0	0	1	2	4			WBGene00003865	316.76	187.277	8904.03	3045.43	2041.57	1171.22		WBGene00016501	3186.72	2111.1	240.343	1385.55	664.197	501.126		WBGene00022396
WBGene00020748	1	8	0	2	0	0		WBGene00020748	1	1	0	2	0	0		WBGene00020748	3	9	2	2	0	0		WBGene00020748	7	6	0	2	0	0			WBGene00006935	1218.08	1243.74	1076.53	995.715	617.033	537.225		WBGene00219659	91.0167	47.0677	40.0572	18.636	30.5257	42.923		WBGene00044552
WBGene00003683	32	14	7	27	22	20		WBGene00003683	20	45	21	27	22	20		WBGene00003683	23	21	10	27	22	20		WBGene00003683	60	24	3	27	22	20			WBGene00022629	1020.23	610.301	1349.38	863.364	552.647	576.115		WBGene00016496	1649.68	1939.04	2398.72	3493.85	3851.5	4249.37		WBGene00022398
WBGene00020749	18	11	0	4	1	1		WBGene00020749	4	6	1	4	1	1		WBGene00020749	2	18	0	4	1	1		WBGene00020749	14	5	3	4	1	1			WBGene00194928	57.9561	47.3699	6.75367	7.5433	12.5195	1.80884		WBGene00016495	1153.64	695.214	361.693	572.044	328.414	288.657		WBGene00022399
WBGene00173848	0	0	0	0	0	0		WBGene00173848	0	0	0	0	0	0		WBGene00173848	0	0	0	0	0	0		WBGene00173848	0	0	0	0	0	0			WBGene00023209	769.417	703.939	3763.14	2609.98	2471.71	2654.47		WBGene00016503	26.1673	6.17282	35.3446	8.91287	7.36827	10.7307		WBGene00022402
WBGene00020750	0	0	0	0	1	6		WBGene00020750	3	0	0	0	1	6		WBGene00020750	0	4	2	0	1	6		WBGene00020750	0	0	0	0	1	6			WBGene00022628	31.9758	78.2155	36.4698	56.2318	69.7515	90.4419		WBGene00077712	15.9279	43.9813	84.827	72.9235	97.8927	110.527		WBGene00022400
WBGene00020751	0	0	0	0	0	0		WBGene00020751	0	0	0	0	0	0		WBGene00020751	0	0	0	0	0	0		WBGene00020751	0	0	0	0	0	0			WBGene00000620	6.9947	19.8293	143.178	3.42877	39.347	40.6989		WBGene00018219	18.2033	16.9752	14.1378	4.86157	13.6839	10.7307		WBGene00022401
WBGene00020752	0	0	0	0	0	0		WBGene00020752	0	0	0	0	0	0		WBGene00020752	0	0	0	0	0	0		WBGene00020752	0	0	0	0	0	0			WBGene00006060	1017.23	1097.22	152.633	312.018	471.27	377.143		WBGene00018218	1725.9	1609.56	2207.86	1720.18	2417.85	2578.6		WBGene00018398
WBGene00005877	0	0	0	0	1	0		WBGene00005877	0	0	0	0	1	0		WBGene00005877	0	0	0	0	1	0		WBGene00005877	0	0	0	0	1	0			WBGene00022627	265.799	689.618	66.1859	38.4022	204.783	314.738		WBGene00018217	1237.83	652.004	630.312	301.417	138.945	301.534		WBGene00001152
WBGene00005533	7	8	8	5	0	1		WBGene00005533	12	4	14	5	0	1		WBGene00005533	7	3	2	5	0	1		WBGene00005533	1	0	2	5	0	1			WBGene00022630	40.969	104.655	16.2088	63.0894	69.7515	75.9712		WBGene00018216	496.041	284.721	392.325	351.653	348.414	393.818		WBGene00018399
WBGene00001737	0	0	0	0	5	1		WBGene00001737	1	1	1	0	5	1		WBGene00001737	0	1	0	0	5	1		WBGene00001737	0	0	0	0	5	1			WBGene00006191	16.9871	33.0488	5.40293	14.4008	21.462	9.94861		WBGene00018221	623.465	858.022	1451.48	871.841	987.348	958.255		WBGene00018400
WBGene00020756	96	73	214	163	169	111		WBGene00020756	137	189	74	163	169	111		WBGene00020756	47	40	108	163	169	111		WBGene00020756	168	138	85	163	169	111			WBGene00015660	2119.39	2089.79	1791.07	3668.78	3156.7	2980.06		WBGene00018222	64.8494	71.759	101.321	107.765	109.471	99.7959		WBGene00003865
WBGene00001738	0	0	0	0	0	0		WBGene00001738	0	0	0	0	0	0		WBGene00001738	0	0	0	0	0	0		WBGene00001738	0	0	0	0	0	0			WBGene00006180	6.9947	35.2521	12.1566	19.8869	50.078	55.1696		WBGene00003575	9.10167	22.3765	21.2068	35.6515	31.5783	3.21922		WBGene00006935
WBGene00001739	7	3	2	0	2	5		WBGene00001739	0	3	4	0	2	5		WBGene00001739	0	2	0	0	2	5		WBGene00001739	2	0	0	0	2	5			WBGene00015661	252.808	356.927	62.1337	135.779	113.57	104.008		WBGene00045392	175.207	119.598	208.533	38.8925	48.4201	62.2383		WBGene00022629
WBGene00020755	3	0	1	3	0	1		WBGene00020755	5	0	4	3	0	1		WBGene00020755	1	1	3	3	0	1		WBGene00020755	0	0	1	3	0	1			WBGene00006193	25.9803	82.622	2.70147	10.2863	25.9333	22.6105		WBGene00017823	134.25	110.339	51.8387	87.5082	35.7887	38.6307		WBGene00194928
WBGene00197325	0	0	0	0	0	0		WBGene00197325	0	0	0	0	0	0		WBGene00197325	0	0	0	0	0	0		WBGene00197325	0	0	0	0	0	0			WBGene00019064	149.886	243.46	1007.65	768.045	754.747	649.373		WBGene00017819	13.6525	6.17282	76.5799	4.05131	17.8944	38.6307		WBGene00023209
WBGene00020744	72	63	27	49	38	49		WBGene00020744	118	110	47	49	38	49		WBGene00020744	60	75	49	49	38	49		WBGene00020744	42	78	10	49	38	49			WBGene00017019	4.99621	14.3211	0	1.37151	25.9333	14.4707		WBGene00000488	17.0656	29.3209	37.7009	35.6515	24.21	28.973		WBGene00022628
WBGene00044279	0	1	4	11	6	16		WBGene00044279	1	3	4	11	6	16		WBGene00044279	0	2	7	11	6	16		WBGene00044279	4	5	0	11	6	16			WBGene00017018	409.69	1298.82	40.522	33.602	160.071	277.657		WBGene00002632	375.444	377.313	528.991	671.707	699.986	870.263		WBGene00000620
WBGene00020753	0	5	4	8	3	1		WBGene00020753	4	1	9	8	3	1		WBGene00020753	1	3	1	8	3	1		WBGene00020753	0	0	0	8	3	1			WBGene00005006	1112.16	967.228	818.544	525.973	335.344	219.774		WBGene00017818	510.831	260.03	146.091	228.494	196.838	184.569		WBGene00006060
WBGene00020754	3	6	14	12	8	9		WBGene00020754	10	10	2	12	8	9		WBGene00020754	3	3	12	12	8	9		WBGene00020754	6	1	7	12	8	9			WBGene00017016	2675.97	2182.32	1633.04	1370.82	1082.04	957.78		WBGene00022394	2882.96	1454.47	490.112	569.614	570.515	559.072		WBGene00022627
WBGene00018229	0	4	6	15	14	8		WBGene00018229	6	4	2	15	14	8		WBGene00018229	4	0	2	15	14	8		WBGene00018229	7	5	2	15	14	8			WBGene00017017	795.397	464.886	339.034	243.443	193.158	118.479		WBGene00022393	4771.55	3109.56	2212.57	1866.84	1387.34	1367.1		WBGene00022630
WBGene00018228	4	1	2	0	3	5		WBGene00018228	2	4	1	0	3	5		WBGene00018228	1	5	0	0	3	5		WBGene00018228	3	0	0	0	3	5			WBGene00017015	149.886	156.431	82.3947	78.176	55.4435	45.221		WBGene00022392	19.3411	22.3765	11.7815	11.3437	7.36827	1.07307		WBGene00006191
WBGene00001736	3	0	6	5	239	291		WBGene00001736	0	16	46	5	239	291		WBGene00001736	7	14	9	5	239	291		WBGene00001736	144	28	6	5	239	291			WBGene00006309	161.877	226.935	116.163	128.236	132.349	163.7		WBGene00022397	68.2625	47.8393	120.172	81.0261	129.471	158.815		WBGene00015660
WBGene00020696	1766	3054	21973	11470	17728	15312		WBGene00020696	3510	5986	7195	11470	17728	15312		WBGene00020696	5025	3561	32051	11470	17728	15312		WBGene00020696	24697	7292	12522	11470	17728	15312			WBGene00017636	563.573	508.952	139.126	239.328	169.013	96.7729		WBGene00022396	169.519	185.185	270.975	174.206	192.628	131.988		WBGene00006180
WBGene00023146	0	0	0	0	0	0		WBGene00023146	1	0	0	0	0	0		WBGene00023146	0	1	0	0	0	0		WBGene00023146	0	0	0	0	0	0			WBGene00017635	308.766	377.858	194.506	163.209	145.763	144.707		WBGene00044552	26.1673	23.9197	48.3043	18.636	24.21	28.973		WBGene00015661
WBGene00023143	1	1	0	0	0	0		WBGene00023143	1	2	0	0	0	0		WBGene00023143	1	0	2	0	0	0		WBGene00023143	0	0	0	0	0	0			WBGene00017637	38.9705	69.4025	48.6264	66.5182	86.7423	80.4933		WBGene00022398	2712.3	1121.14	527.812	535.583	311.573	197.446		WBGene00006193
WBGene00004422	20292	12770	18497	35676	26973	22196		WBGene00004422	28473	32867	11175	35676	26973	22196		WBGene00004422	13230	14170	18551	35676	26973	22196		WBGene00004422	16428	18637	10515	35676	26973	22196			WBGene00005648	4134.87	2968.88	2525.87	1909.83	1446	1684.93		WBGene00022399	1570.04	1222.22	421.779	699.255	488.411	365.918		WBGene00019064
WBGene00020695	241	234	1194	1087	956	889		WBGene00020695	339	916	485	1087	956	889		WBGene00020695	302	264	1217	1087	956	889		WBGene00020695	1004	451	531	1087	956	889			WBGene00005649	50.9614	51.7765	21.6117	17.1439	9.83675	12.6619		WBGene00022402	2849.96	1542.43	1250.02	960.97	813.668	779.052		WBGene00017019
WBGene00023145	27	30	8	15	34	44		WBGene00023145	21	30	44	15	34	44		WBGene00023145	55	46	10	15	34	44		WBGene00023145	24	33	23	15	34	44			WBGene00017633	72.9447	117.874	8.1044	40.4595	48.2895	53.3607		WBGene00022400	2489.31	1262.34	724.564	572.855	504.2	508.637		WBGene00017018
WBGene00023144	0	0	0	0	1	0		WBGene00023144	0	0	0	0	1	0		WBGene00023144	0	0	0	0	1	0		WBGene00023144	0	0	0	0	1	0			WBGene00017639	166.874	274.305	27.0147	55.5461	62.5975	70.5447		WBGene00022401	4327.85	2430.55	2104.18	1469	1164.19	966.84		WBGene00005006
WBGene00044705	9	8	3	22	12	7		WBGene00044705	23	13	11	22	12	7		WBGene00044705	16	32	4	22	12	7		WBGene00044705	11	11	1	22	12	7			WBGene00017640	679.485	1303.22	767.217	333.962	629.552	632.189		WBGene00018398	2427.87	1790.89	623.243	334.638	873.666	847.729		WBGene00017016
WBGene00197317	0	1	2	0	0	0		WBGene00197317	1	2	0	0	0	0		WBGene00197317	0	0	3	0	0	0		WBGene00197317	0	0	0	0	0	0			WBGene00019478	383.709	370.147	403.869	211.898	179.744	208.921		WBGene00001152	489.215	314.814	223.849	139.365	119.998	129.842		WBGene00017017
WBGene00005423	0	0	1	2	0	2		WBGene00005423	3	1	1	2	0	2		WBGene00005423	1	2	4	2	0	2		WBGene00005423	1	6	1	2	0	2			WBGene00019477	183.861	243.46	210.714	240.7	272.746	446.783		WBGene00018399	444.844	560.183	143.735	305.468	207.364	154.523		WBGene00017015
WBGene00005422	2	0	0	1	3	1		WBGene00005422	3	7	9	1	3	1		WBGene00005422	1	3	0	1	3	1		WBGene00005422	6	5	0	1	3	1			WBGene00019476	440.666	245.663	128.32	136.465	68.8573	85.0154		WBGene00018400	1414.17	837.96	274.51	186.36	211.575	171.692		WBGene00006309
WBGene00020697	43	17	21	22	11	9		WBGene00020697	53	32	40	22	11	9		WBGene00020697	16	33	16	22	11	9		WBGene00020697	15	37	13	22	11	9			WBGene00019479	878.334	659.874	899.588	636.38	552.647	544.46		WBGene00003865	949.987	1514.66	258.015	3598.37	2403.11	1389.63		WBGene00017636
WBGene00020698	50	29	10	46	21	19		WBGene00020698	38	42	66	46	21	19		WBGene00020698	43	56	16	46	21	19		WBGene00020698	58	20	5	46	21	19			WBGene00019480	793.399	816.305	140.476	142.637	273.641	276.752		WBGene00006935	1492.67	1381.94	618.53	1176.5	726.301	637.406		WBGene00017635
WBGene00020699	38	12	15	234	22	47		WBGene00020699	42	79	83	234	22	47		WBGene00020699	20	60	58	234	22	47		WBGene00020699	8	26	6	234	22	47			WBGene00019481	2649.99	3500.97	1130.56	763.93	739.545	633.998		WBGene00022629	1308.37	1546.29	693.932	1020.12	650.513	683.548		WBGene00017637
WBGene00170102	0	0	0	0	0	0		WBGene00170102	0	0	0	0	0	0		WBGene00170102	0	0	0	0	0	0		WBGene00170102	0	0	0	0	0	0			WBGene00000098	2040.45	1157.81	3145.86	2072.35	1391.45	1222.77		WBGene00194928	47.7838	21.6049	4.71261	8.91287	14.7365	2.14615		WBGene00005648
WBGene00020700	155	20	17	11820	316	2652		WBGene00020700	785	459	4160	11820	316	2652		WBGene00020700	55	850	4162	11820	316	2652		WBGene00020700	102	258	6	11820	316	2652			WBGene00044955	2731.93	1857.34	683.471	1073.89	902.299	1059.08		WBGene00023209	1169.57	1930.55	2243.2	3083.85	2909.41	3149.47		WBGene00005649
WBGene00005984	0	5	0	0	0	0		WBGene00005984	0	0	1	0	0	0		WBGene00005984	0	0	2	0	0	0		WBGene00005984	0	0	0	0	0	0			WBGene00044956	5392.91	4462.69	1187.29	1548.43	1191.14	1363.86		WBGene00022628	34.1313	54.0122	93.0741	66.4414	82.1036	107.307		WBGene00017633
WBGene00005985	0	0	0	4	0	0		WBGene00005985	0	0	4	4	0	0		WBGene00005985	0	0	0	4	0	0		WBGene00005985	0	0	0	4	0	0			WBGene00004395	111.915	172.955	187.752	161.152	175.273	260.473		WBGene00000620	13.6525	19.2901	29.4538	4.05131	46.3148	48.2883		WBGene00017639
WBGene00019098	0	0	2	1	1	1		WBGene00019098	2	1	8	1	1	1		WBGene00019098	0	0	0	1	1	1		WBGene00019098	1	3	1	1	1	1			WBGene00045055	238.819	232.443	109.409	235.214	262.91	243.289		WBGene00006060	616.638	709.102	832.954	368.669	554.726	447.472		WBGene00017640
WBGene00167403	0	0	0	0	0	0		WBGene00167403	0	0	0	0	0	0		WBGene00167403	0	0	0	0	0	0		WBGene00167403	0	2	0	0	0	0			WBGene00015859	306.768	561.83	89.1484	106.292	143.08	122.097		WBGene00022627	81.9151	190.586	898.931	45.3746	241.048	373.43		WBGene00019478
WBGene00019099	0	2	1	0	0	0		WBGene00019099	0	0	2	0	0	0		WBGene00019099	0	0	0	0	0	0		WBGene00019099	0	2	0	0	0	0			WBGene00015860	103.921	170.752	36.4698	70.6327	92.1078	75.9712		WBGene00022630	27.305	65.5862	73.0455	74.544	82.1036	90.1382		WBGene00019477
WBGene00019097	1251	1268	1601	2959	2974	2988		WBGene00019097	2614	3277	1536	2959	2974	2988		WBGene00019097	1057	1237	1825	2959	2974	2988		WBGene00019097	2363	1724	632	2959	2974	2988			WBGene00022932	96.9265	107.959	60.783	161.152	154.705	149.229		WBGene00006191	28.4427	8.48762	20.0286	17.0155	25.2626	11.8038		WBGene00019476
WBGene00005932	0	0	0	0	1	2		WBGene00005932	0	0	4	0	1	2		WBGene00005932	2	5	0	0	1	2		WBGene00005932	1	1	2	0	1	2			WBGene00015861	39.9697	35.2521	45.9249	34.2877	32.193	29.8458		WBGene00015660	1403.93	905.089	1145.16	4334.9	3715.71	3535.78		WBGene00019479
WBGene00019100	82	72	137	142	129	161		WBGene00019100	110	180	178	142	129	161		WBGene00019100	67	57	98	142	129	161		WBGene00019100	184	101	104	142	129	161			WBGene00015857	110.916	110.163	44.5742	54.1746	39.347	53.3607		WBGene00006180	17.0656	16.2036	60.0858	23.4976	58.9462	65.4575		WBGene00019480
WBGene00019101	26	15	13	12	5	7		WBGene00019101	44	44	14	12	5	7		WBGene00019101	14	7	21	12	5	7		WBGene00019101	10	13	7	12	5	7			WBGene00017679	46.9644	24.2358	14.8581	19.8869	16.0965	14.4707		WBGene00015661	381.133	249.999	328.705	160.432	133.681	123.404		WBGene00019481
WBGene00006165	0	0	0	4	0	0		WBGene00006165	2	1	8	4	0	0		WBGene00006165	3	0	1	4	0	0		WBGene00006165	0	0	0	4	0	0			WBGene00017680	28.978	15.4228	6.75367	6.17179	3.577	9.04419		WBGene00006193	47.7838	23.9197	10.6034	12.1539	30.5257	26.8269		WBGene00000098
WBGene00000062	19	33	7	12	18	16		WBGene00000062	4	9	36	12	18	16		WBGene00000062	6	18	5	12	18	16		WBGene00000062	25	5	7	12	18	16			WBGene00000219	3039.7	8069.42	48702	34474.9	51262	51075.3		WBGene00019064	152.453	223.765	306.32	907.493	888.403	770.467		WBGene00044955
WBGene00006164	0	0	0	0	0	0		WBGene00006164	0	0	0	0	0	0		WBGene00006164	0	0	0	0	0	0		WBGene00006164	0	0	0	0	0	0			WBGene00017678	16.9871	14.3211	68.8874	1016.29	2233.84	2017.76		WBGene00017018	87.6036	227.623	933.097	39.7028	188.417	329.434		WBGene00044956
WBGene00044527	580	512	128	235	185	131		WBGene00044527	816	761	211	235	185	131		WBGene00044527	558	577	134	235	185	131		WBGene00044527	204	703	111	235	185	131			WBGene00000218	1629.76	4362.44	24321.3	17505.2	29097.1	30321.6		WBGene00005006	2102.49	1109.56	338.13	621.47	394.729	260.757		WBGene00004395
WBGene00194902	2	8	1	5	1	2		WBGene00194902	17	8	14	5	1	2		WBGene00194902	0	9	4	5	1	2		WBGene00194902	3	5	1	5	1	2			WBGene00017677	48.9629	34.1504	6.75367	70.6327	15.2023	17.184		WBGene00017016	4002.46	2374.22	2015.82	1619.71	1273.66	1136.39		WBGene00045055
WBGene00021081	15	4	4	17	4	3		WBGene00021081	21	20	18	17	4	3		WBGene00021081	10	17	7	17	4	3		WBGene00021081	3	21	1	17	4	3			WBGene00017681	234.822	215.919	221.52	163.895	295.103	316.547		WBGene00017017	1421	622.683	195.573	287.643	227.364	140.573		WBGene00015859
WBGene00269423	0	0	0	0	0	0		WBGene00269423	0	0	0	0	0	0		WBGene00269423	0	0	0	0	0	0		WBGene00269423	0	1	2	0	0	0			WBGene00020939	11.9909	7.71139	14.8581	28.1159	20.5678	35.2724		WBGene00017015	170.656	121.913	100.143	92.3698	65.2618	53.6537		WBGene00015860
WBGene00021080	7	7	19	35	43	57		WBGene00021080	27	32	35	35	43	57		WBGene00021080	17	15	22	35	43	57		WBGene00021080	58	12	11	35	43	57			WBGene00020940	348.736	250.069	148.581	207.784	139.503	104.913		WBGene00006309	77.3642	127.314	275.688	151.519	155.786	194.226		WBGene00022932
WBGene00021079	235	129	104	300	156	127		WBGene00021079	611	376	284	300	156	127		WBGene00021079	171	188	243	300	156	127		WBGene00021079	195	291	86	300	156	127			WBGene00020941	88.9326	85.9269	90.4991	57.6034	16.9908	22.6105		WBGene00017636	675.799	425.924	237.987	282.781	198.943	114.819		WBGene00015861
WBGene00021078	261	515	2958	2652	3372	2777		WBGene00021078	499	1217	1179	2652	3372	2777		WBGene00021078	768	545	2592	2652	3372	2777		WBGene00021078	3583	874	1160	2652	3372	2777			WBGene00020942	231.824	178.464	476.809	448.483	308.516	264.995		WBGene00017635	286.703	328.703	263.906	192.842	171.575	171.692		WBGene00015857
WBGene00003025	239	398	2288	1800	2204	2139		WBGene00003025	590	1384	826	1800	2204	2139		WBGene00003025	326	315	2410	1800	2204	2139		WBGene00003025	2498	877	1084	1800	2204	2139			WBGene00004766	5033.19	4756.82	2101.74	1638.27	1864.51	2096.44		WBGene00017637	61.4363	57.0986	84.827	78.5953	102.103	95.5036		WBGene00017679
WBGene00220102	0	0	1	0	1	0		WBGene00220102	0	0	0	0	1	0		WBGene00220102	0	0	5	0	1	0		WBGene00220102	1	0	0	0	1	0			WBGene00020946	8.99318	8.81301	0	64.4609	11.6253	36.1768		WBGene00005648	5402.98	4064.03	2219.64	2256.58	1702.07	1999.14		WBGene00017680
WBGene00020854	221	299	628	1281	964	1348		WBGene00020854	238	457	1007	1281	964	1348		WBGene00020854	282	332	477	1281	964	1348		WBGene00020854	1480	395	242	1281	964	1348			WBGene00020943	56.9568	16.5244	6.75367	32.2304	16.9908	14.4707		WBGene00005649	102.394	46.2961	36.5227	20.2565	11.5787	15.023		WBGene00000219
WBGene00219739	5	6	3	10	3	15		WBGene00219739	2	6	18	10	3	15		WBGene00219739	4	3	4	10	3	15		WBGene00219739	18	4	1	10	3	15			WBGene00020938	676.487	400.992	594.323	565.747	252.179	112.148		WBGene00017633	44.3707	77.9318	63.6203	47.8054	56.8409	63.3114		WBGene00017678
WBGene00006096	2	1	0	1	0	1		WBGene00006096	0	0	1	1	0	1		WBGene00006096	0	2	0	1	0	1		WBGene00006096	1	0	0	1	0	1			WBGene00006582	337.744	395.484	216.117	349.049	283.477	321.973		WBGene00017639	171.794	108.024	228.562	65.6312	73.6827	83.6998		WBGene00000218
WBGene00020855	32	62	48	28	90	246		WBGene00020855	4	40	230	28	90	246		WBGene00020855	104	108	17	28	90	246		WBGene00020855	596	38	21	28	90	246			WBGene00235325	35.9727	31.9472	6.75367	8.9148	11.6253	8.13977		WBGene00017640	931.784	1115.74	921.316	394.597	741.038	750.079		WBGene00017677
WBGene00023351	0	0	0	0	0	2		WBGene00023351	0	0	1	0	0	2		WBGene00023351	0	0	0	0	0	2		WBGene00023351	14	0	0	0	0	2			WBGene00015592	65.95	50.6748	22.9625	66.5182	18.7793	21.7061		WBGene00019478	370.893	452.931	536.06	250.371	211.575	247.88		WBGene00017681
WBGene00198265	2	0	0	0	0	4		WBGene00198265	1	0	0	0	0	4		WBGene00198265	0	0	0	0	0	4		WBGene00198265	3	0	0	0	0	4			WBGene00044957	20.9841	16.5244	8.1044	26.0587	26.8275	31.6547		WBGene00019477	208.201	300.153	671.547	284.402	321.046	530.099		WBGene00020939
WBGene00003479	109	148	925	631	580	497		WBGene00003479	201	412	270	631	580	497		WBGene00003479	191	147	1060	631	580	497		WBGene00003479	654	260	400	631	580	497			WBGene00003395	276.79	149.821	3147.21	929.197	679.63	421.459		WBGene00019476	659.871	283.95	160.229	161.242	81.051	100.869		WBGene00020940
WBGene00021482	413	501	393	1198	778	946		WBGene00021482	648	913	1270	1198	778	946		WBGene00021482	587	771	696	1198	778	946		WBGene00021482	989	690	265	1198	778	946			WBGene00018181	2098.41	1557.7	1119.76	880.508	1039.12	1020.18		WBGene00019479	1385.73	834.102	759.909	751.922	650.513	645.991		WBGene00020941
WBGene00000498	527	352	1785	2053	1324	1176		WBGene00000498	880	1675	744	2053	1324	1176		WBGene00000498	348	412	2223	2053	1324	1176		WBGene00000498	1010	988	981	2053	1324	1176			WBGene00001664	68.9477	73.809	12.1566	38.4022	21.462	30.7503		WBGene00019480	707.655	432.097	830.598	168.534	322.099	328.361		WBGene00020942
WBGene00021479	1	0	12	4	6	2		WBGene00021479	0	2	2	4	6	2		WBGene00021479	0	2	7	4	6	2		WBGene00021479	2	1	2	4	6	2			WBGene00018178	124.905	135.5	32.4176	74.7472	67.963	75.0668		WBGene00019481	3761.27	2204.47	1451.48	902.631	870.509	752.225		WBGene00004766
WBGene00197747	0	0	0	0	0	0		WBGene00197747	0	0	0	0	0	0		WBGene00197747	0	0	0	0	0	0		WBGene00197747	0	0	0	0	0	0			WBGene00018694	280.787	174.057	55.3801	132.351	63.4918	34.3679		WBGene00000098	3515.52	2797.06	926.028	2448.61	1637.86	1450.8		WBGene00020946
WBGene00021478	5	1	0	4	6	5		WBGene00021478	5	1	12	4	6	5		WBGene00021478	2	0	0	4	6	5		WBGene00021478	4	5	0	4	6	5			WBGene00044696	7348.43	4940.8	3031.05	2055.21	1533.64	1362.96		WBGene00044955	4160.6	1460.64	4704.36	1268.87	1062.08	1256.57		WBGene00020943
WBGene00019964	1	1	0	2	0	0		WBGene00019964	7	1	2	2	0	0		WBGene00019964	1	0	1	2	0	0		WBGene00019964	0	1	0	2	0	0			WBGene00002021	1106.16	1509.23	398.466	180.353	439.077	591.49		WBGene00044956	8950.36	3089.5	9663.21	1829.57	1402.08	1618.2		WBGene00020938
WBGene00019961	20	37	84	67	51	74		WBGene00019961	10	67	34	67	51	74		WBGene00019961	19	15	32	67	51	74		WBGene00019961	72	14	7	67	51	74			WBGene00018696	110.916	125.585	22.9625	52.1173	49.1838	55.1696		WBGene00004395	109.22	111.882	276.866	190.411	206.312	309.045		WBGene00006582
WBGene00019963	1944	4661	3316	2704	4702	7335		WBGene00019963	1276	4651	4785	2704	4702	7335		WBGene00019963	3097	5552	1837	2704	4702	7335		WBGene00019963	6309	2500	550	2704	4702	7335			WBGene00018697	124.905	189.48	152.633	170.753	288.843	335.54		WBGene00045055	408.438	184.413	660.944	277.92	309.467	288.657		WBGene00235325
WBGene00019962	198	233	496	502	403	691		WBGene00019962	360	572	268	502	403	691		WBGene00019962	187	272	498	502	403	691		WBGene00019962	656	368	244	502	403	691			WBGene00018692	86.9341	102.451	56.7308	37.7165	68.8573	68.7359		WBGene00015859	265.086	284.721	248.59	125.59	168.418	144.865		WBGene00015592
WBGene00019965	101	76	981	401	426	416		WBGene00019965	220	253	265	401	426	416		WBGene00019965	128	89	604	401	426	416		WBGene00019965	537	347	433	401	426	416			WBGene00018698	1778.65	1016.8	1210.26	916.168	520.454	378.952		WBGene00015860	77.3642	134.259	129.597	83.4569	108.419	90.1382		WBGene00044957
WBGene00019970	19	20	82	519	93	274		WBGene00019970	47	28	52	519	93	274		WBGene00019970	24	47	114	519	93	274		WBGene00019970	76	66	36	519	93	274			WBGene00004078	815.382	352.521	8586.61	4571.24	2614.79	1599.01		WBGene00022932	212.752	107.253	371.118	190.411	182.102	177.057		WBGene00003395
WBGene00019969	2	1	5	6	2	2		WBGene00019969	7	13	0	6	2	2		WBGene00019969	4	3	0	6	2	2		WBGene00019969	0	4	0	6	2	2			WBGene00018700	682.483	858.167	3682.1	3280.65	2139.94	2074.74		WBGene00015861	48.9215	40.1233	41.2353	40.5131	37.894	35.4114		WBGene00018181
WBGene00019966	0	1	0	1	0	0		WBGene00019966	0	0	0	1	0	0		WBGene00019966	1	0	0	1	0	0		WBGene00019966	0	0	1	1	0	0			WBGene00235318	20.9841	1.10163	4.0522	21.9441	5.3655	10.853		WBGene00015857	103.532	101.08	101.321	64.0106	46.3148	63.3114		WBGene00001664
WBGene00019967	267	125	128	163	135	140		WBGene00019967	200	292	196	163	135	140		WBGene00019967	142	152	49	163	135	140		WBGene00019967	208	177	46	163	135	140			WBGene00020720	70.9462	87.0285	13.5073	40.4595	27.7218	54.2652		WBGene00017679	73.9511	35.4937	17.6723	23.4976	18.947	17.1692		WBGene00018178
WBGene00019968	46	14	13	20	12	14		WBGene00019968	3	26	33	20	12	14		WBGene00019968	11	12	4	20	12	14		WBGene00019968	25	15	1	20	12	14			WBGene00044553	850.356	784.358	190.453	257.158	325.507	257.76		WBGene00017680	31.8559	10.8024	9.42522	7.29235	4.21044	10.7307		WBGene00018694
WBGene00005754	3	5	1	4	0	2		WBGene00005754	3	2	1	4	0	2		WBGene00005754	4	6	2	4	0	2		WBGene00005754	0	1	0	4	0	2			WBGene00020721	309.765	223.63	1025.21	1024.52	475.741	522.754		WBGene00000219	8408.81	15317.8	29952.2	40734.3	60339.8	60599.7		WBGene00044696
WBGene00005753	1	0	0	0	0	0		WBGene00005753	0	2	0	0	0	0		WBGene00005753	1	2	0	0	0	0		WBGene00005753	0	0	0	0	0	0			WBGene00001040	1505.86	1239.33	913.096	540.374	388.105	255.951		WBGene00017678	109.22	249.228	319.279	1200.81	2629.42	2394.03		WBGene00002021
WBGene00019179	1	0	0	0	0	0		WBGene00019179	0	0	0	0	0	0		WBGene00019179	0	0	0	0	0	0		WBGene00019179	0	0	0	0	0	0			WBGene00020719	372.718	472.598	2100.39	1114.35	1082.94	1043.7		WBGene00000218	3901.2	6889.64	15814.3	20683.5	34249.8	35975.9		WBGene00018696
WBGene00019178	0	0	0	3	1	0		WBGene00019178	5	2	0	3	1	0		WBGene00019178	0	0	0	3	1	0		WBGene00019178	8	3	0	3	1	0			WBGene00020718	3300.5	2656.02	1154.88	1005.32	898.722	852.867		WBGene00017677	134.25	57.8702	68.3329	83.4569	17.8944	20.3884		WBGene00018697
WBGene00019180	32	62	73	122	157	163		WBGene00019180	19	76	151	122	157	163		WBGene00019180	87	109	55	122	157	163		WBGene00019180	209	83	25	122	157	163			WBGene00220083	21.9833	38.5569	9.45513	17.8296	15.2023	20.8016		WBGene00017681	182.033	294.752	272.153	193.652	347.361	375.576		WBGene00018692
WBGene00019177	1	8	1	30	19	23		WBGene00019177	3	10	20	30	19	23		WBGene00019177	5	7	6	30	19	23		WBGene00019177	16	2	1	30	19	23			WBGene00020717	1230.07	1108.24	757.761	624.036	651.909	597.821		WBGene00020939	15.9279	13.1172	22.3849	33.2207	24.21	41.8499		WBGene00018698
WBGene00019181	4	1	0	1	1	4		WBGene00019181	0	1	0	1	1	4		WBGene00019181	1	4	1	1	1	4		WBGene00019181	3	0	1	1	1	4			WBGene00020716	972.263	605.895	565.957	301.732	184.216	147.42		WBGene00020940	722.445	382.715	129.597	245.509	164.207	124.477		WBGene00004078
WBGene00018543	22	15	11	15	7	27		WBGene00018543	52	50	9	15	7	27		WBGene00018543	3	19	6	15	7	27		WBGene00018543	15	45	6	15	7	27			WBGene00020722	145.889	87.0285	22.9625	27.4302	45.6068	43.4121		WBGene00020941	309.457	120.37	45.948	68.0619	19.9996	26.8269		WBGene00018700
WBGene00018539	4	0	0	8	0	3		WBGene00018539	0	0	2	8	0	3		WBGene00018539	11	4	0	8	0	3		WBGene00018539	2	2	0	8	0	3			WBGene00220084	56.9568	28.6423	49.9771	58.9749	56.3378	52.4563		WBGene00020942	262.811	273.919	232.096	529.911	363.151	314.411		WBGene00235318
WBGene00018540	254	323	40	204	104	140		WBGene00018540	282	184	287	204	104	140		WBGene00018540	247	513	79	204	104	140		WBGene00018540	98	432	11	204	104	140			WBGene00004256	949.281	1080.7	899.588	784.503	732.391	664.748		WBGene00004766	6854.7	4037.02	3894.97	1935.71	2194.69	2487.39		WBGene00020720
WBGene00018541	4	5	1	2	3	4		WBGene00018541	5	2	2	2	3	4		WBGene00018541	8	4	0	2	3	4		WBGene00018541	5	6	0	2	3	4			WBGene00044958	79.9394	53.9797	37.8205	152.923	137.715	188.119		WBGene00020946	70.538	5.40122	288.647	76.1646	13.6839	42.923		WBGene00044553
WBGene00018544	1	2	0	2	5	1		WBGene00018544	0	1	2	2	5	1		WBGene00018544	0	4	0	2	5	1		WBGene00018544	2	1	0	2	5	1			WBGene00022842	9.99243	13.2195	5.40293	9.60056	13.4138	7.23535		WBGene00020943	69.4003	26.2345	77.7581	38.0823	19.9996	17.1692		WBGene00020721
WBGene00018545	0	2	0	0	2	0		WBGene00018545	0	2	1	0	2	0		WBGene00018545	0	0	0	0	2	0		WBGene00018545	3	0	0	0	2	0			WBGene00018481	800.393	837.236	205.311	272.93	173.485	221.583		WBGene00020938	1244.65	629.627	168.476	668.465	296.836	133.061		WBGene00001040
WBGene00018542	3	1	0	5	2	2		WBGene00018542	0	4	8	5	2	2		WBGene00018542	1	2	3	5	2	2		WBGene00018542	5	9	0	5	2	2			WBGene00018482	474.64	573.948	3059.41	1559.4	1196.51	1108.82		WBGene00006582	324.247	302.468	460.658	412.423	333.677	382.014		WBGene00020719
WBGene00015900	2	5	10	9	4	17		WBGene00015900	8	7	10	9	4	17		WBGene00015900	8	12	1	9	4	17		WBGene00015900	38	14	4	9	4	17			WBGene00018483	197.85	219.224	1977.47	1021.09	904.087	676.506		WBGene00235325	64.8494	13.1172	17.6723	10.5334	13.6839	9.65767		WBGene00020718
WBGene00015901	18	7	7	12	12	16		WBGene00015901	5	14	17	12	12	16		WBGene00015901	8	13	3	12	12	16		WBGene00015901	7	9	6	12	12	16			WBGene00001882	136.896	99.1464	1045.47	207.784	86.7423	183.597		WBGene00015592	91.0167	62.4998	63.6203	78.5953	22.1048	25.7538		WBGene00220083
WBGene00015902	4	3	3	2	1	2		WBGene00015902	2	2	2	2	1	2		WBGene00015902	4	9	0	2	1	2		WBGene00015902	4	7	5	2	1	2			WBGene00001881	286.783	477.004	1017.1	384.708	430.134	840.206		WBGene00044957	37.5444	24.6913	87.1833	30.7899	31.5783	37.5576		WBGene00020717
WBGene00003714	1	1	3	3	8	6		WBGene00003714	0	2	10	3	8	6		WBGene00003714	2	5	0	3	8	6		WBGene00003714	10	5	0	3	8	6			WBGene00001880	437.668	727.074	1780.27	542.432	646.543	947.831		WBGene00003395	683.763	827.158	173.188	1097.9	799.984	500.053		WBGene00020716
WBGene00174095	0	0	0	0	0	0		WBGene00174095	0	0	0	0	0	0		WBGene00174095	0	0	0	0	0	0		WBGene00174095	0	0	0	0	0	0			WBGene00001879	848.357	817.407	1958.56	969.656	731.497	1445.26		WBGene00018181	2657.69	1904.31	966.085	1040.38	1223.13	1210.43		WBGene00020722
WBGene00171486	0	0	0	1	0	0		WBGene00171486	0	0	0	1	0	0		WBGene00171486	0	0	0	1	0	0		WBGene00171486	0	0	0	1	0	0			WBGene00017798	52.9599	98.0448	78.3425	73.3757	262.015	251.429		WBGene00001664	76.2265	41.6665	86.0052	45.3746	25.2626	36.4845		WBGene00220084
WBGene00015906	15	25	0	15	35	23		WBGene00015906	0	16	25	15	35	23		WBGene00015906	18	12	2	15	35	23		WBGene00015906	21	12	2	15	35	23			WBGene00003816	73.944	170.752	240.431	259.215	911.241	920.699		WBGene00018178	106.945	96.4503	71.8673	88.3185	79.9984	89.0652		WBGene00004256
WBGene00015903	31	16	194	155	30	16		WBGene00015903	75	109	0	155	30	16		WBGene00015903	13	18	157	155	30	16		WBGene00015903	13	63	72	155	30	16			WBGene00000054	63.9515	90.3334	29.7161	48.6885	53.655	70.5447		WBGene00018694	187.722	144.29	69.511	156.38	74.7353	40.7768		WBGene00044958
WBGene00015905	372	98	163	181	53	23		WBGene00015905	722	354	11	181	53	23		WBGene00015905	132	85	181	181	53	23		WBGene00015905	16	335	138	181	53	23			WBGene00000055	219.833	302.947	83.7455	64.4609	111.781	119.383		WBGene00044696	12766.2	5956.77	1989.9	2428.35	1805.23	1617.12		WBGene00022842
WBGene00015899	399	72	535	406	72	35		WBGene00015899	843	503	14	406	72	35		WBGene00015899	47	47	571	406	72	35		WBGene00015899	25	432	273	406	72	35			WBGene00017799	2375.2	2150.38	1087.34	645.98	729.708	572.497		WBGene00002021	1038.73	695.985	380.543	213.099	516.832	701.791		WBGene00018481
WBGene00015898	8	10	0	7	2	1		WBGene00015898	28	8	3	7	2	1		WBGene00015898	6	8	11	7	2	1		WBGene00015898	5	1	1	7	2	1			WBGene00017800	579.561	619.114	2003.14	1563.52	1054.32	818.499		WBGene00018696	72.8134	40.1233	108.39	61.5798	57.8936	65.4575		WBGene00018482
WBGene00015904	0	2	0	1	0	0		WBGene00015904	0	0	1	1	0	0		WBGene00015904	0	1	0	1	0	0		WBGene00015904	0	1	0	1	0	0			WBGene00017797	445.662	588.269	1133.27	813.99	674.265	601.439		WBGene00018697	76.2265	119.598	358.158	201.755	339.993	398.111		WBGene00018483
WBGene00006260	1	0	0	1	0	0		WBGene00006260	0	2	1	1	0	0		WBGene00006260	0	0	0	1	0	0		WBGene00006260	0	0	0	1	0	0			WBGene00017796	48.9629	47.3699	45.9249	63.7751	44.7125	33.4635		WBGene00018692	92.1544	58.6418	170.832	44.5644	81.051	81.5536		WBGene00001882
WBGene00005404	0	0	0	0	0	0		WBGene00005404	0	0	1	0	0	0		WBGene00005404	0	0	0	0	0	0		WBGene00005404	0	0	0	0	0	0			WBGene00015670	387.706	268.797	245.833	130.979	70.6458	72.3535		WBGene00018698	2779.42	2023.91	569.048	1082.51	612.619	449.618		WBGene00001881
WBGene00015897	50	46	12	57	45	56		WBGene00015897	64	56	78	57	45	56		WBGene00015897	24	88	17	57	45	56		WBGene00015897	40	39	8	57	45	56			WBGene00015671	150.886	190.581	502.473	524.602	733.285	529.085		WBGene00004078	2366.44	2297.83	400.572	5401.2	3077.83	1897.2		WBGene00001880
WBGene00005952	0	1	0	0	2	0		WBGene00005952	0	0	0	0	2	0		WBGene00005952	0	0	0	0	2	0		WBGene00005952	0	0	0	0	2	0			WBGene00007055	1134.14	1101.63	402.519	972.399	499.886	789.558		WBGene00018700	1343.63	1447.53	1896.83	3876.29	2518.9	2461.63		WBGene00001879
WBGene00005959	2	5	7	12	11	8		WBGene00005959	12	15	4	12	11	8		WBGene00005959	8	5	3	12	11	8		WBGene00005959	6	3	3	12	11	8			WBGene00018288	25.9803	46.2683	12.1566	17.8296	9.83675	15.3751		WBGene00219961	3.41313	11.574	9.42522	25.9284	9.47349	10.7307		WBGene00017798
WBGene00005958	0	1	0	2	4	2		WBGene00005958	0	0	0	2	4	2		WBGene00005958	3	3	1	2	4	2		WBGene00005958	0	0	0	2	4	2			WBGene00018289	53.9591	84.8253	0	2.74302	16.9908	56.9784		WBGene00235318	42.0952	8.48762	4.71261	25.9284	6.31566	12.8769		WBGene00003816
WBGene00005957	0	1	0	1	0	0		WBGene00005957	0	0	3	1	0	0		WBGene00005957	0	1	2	1	0	0		WBGene00005957	0	0	0	1	0	0			WBGene00044554	228.827	14.3211	128.32	102.863	25.9333	3.61768		WBGene00020720	75.0888	81.0182	49.4824	47.8054	32.6309	64.3845		WBGene00000054
WBGene00005956	0	0	0	0	0	0		WBGene00005956	0	0	0	0	0	0		WBGene00005956	0	0	0	0	0	0		WBGene00005956	0	0	0	0	0	0			WBGene00018286	441.665	250.069	214.767	1381.79	437.288	565.262		WBGene00044553	657.596	684.411	623.243	303.848	383.15	305.826		WBGene00000055
WBGene00005960	0	0	0	1	1	0		WBGene00005960	0	0	3	1	1	0		WBGene00005960	0	0	0	1	1	0		WBGene00005960	0	0	0	1	1	0			WBGene00018290	3400.42	2838.89	1564.15	953.884	752.065	542.652		WBGene00020721	543.825	621.911	662.122	1210.53	559.989	620.237		WBGene00017799
WBGene00005955	0	0	0	0	0	0		WBGene00005955	0	2	0	0	0	0		WBGene00005955	1	0	0	0	0	0		WBGene00005955	0	0	0	0	0	0			WBGene00018285	839.364	1104.93	4246.71	2796.51	2353.67	2438.31		WBGene00001040	2832.9	1481.48	380.543	638.486	456.833	303.68		WBGene00017800
WBGene00005954	0	0	0	0	0	0		WBGene00005954	0	0	0	0	0	0		WBGene00005954	0	0	0	0	0	0		WBGene00005954	0	0	0	0	0	0			WBGene00018291	17.9864	3.30488	1.35073	26.7444	20.5678	18.0884		WBGene00020719	608.674	935.182	645.628	1316.67	1274.71	1238.33		WBGene00017797
WBGene00005961	4	3	2	3	2	7		WBGene00005961	3	21	5	3	2	7		WBGene00005961	6	11	2	3	2	7		WBGene00005961	6	3	0	3	2	7			WBGene00001694	10021.4	15276.3	1614.13	1652.67	6311.62	5503.39		WBGene00020718	4677.12	2472.21	2017	1187.84	1057.87	1011.91		WBGene00017796
WBGene00019473	148	218	39	33	124	199		WBGene00019473	73	134	41	33	124	199		WBGene00019473	266	97	33	33	124	199		WBGene00019473	168	95	41	33	124	199			WBGene00018292	28.978	139.907	167.491	192.011	1128.54	903.515		WBGene00220083	54.61	23.1481	94.2522	21.0668	17.8944	24.6807		WBGene00015670
WBGene00019472	18	15	1	34	17	25		WBGene00019472	17	21	72	34	17	25		WBGene00019472	24	37	3	34	17	25		WBGene00019472	17	7	0	34	17	25			WBGene00018284	45.9652	34.1504	17.5595	20.5726	25.9333	10.853		WBGene00020717	1521.12	1238.42	929.563	737.338	767.353	709.302		WBGene00015671
WBGene00196242	0	0	0	0	0	0		WBGene00196242	0	0	0	0	0	0		WBGene00196242	0	0	0	0	0	0		WBGene00196242	0	0	0	0	0	0			WBGene00018293	691.476	593.777	383.608	63.0894	204.783	278.561		WBGene00020716	1698.6	748.454	311.032	356.515	216.838	174.911		WBGene00007055
WBGene00019471	1	0	1	7	2	4		WBGene00019471	2	1	4	7	2	4		WBGene00019471	0	1	0	7	2	4		WBGene00019471	0	3	0	7	2	4			WBGene00018294	683.482	633.435	2805.47	2485.86	1589.08	1689.46		WBGene00020722	125.148	77.9318	196.752	32.4104	53.6831	51.5076		WBGene00018288
WBGene00019470	0	0	0	0	0	0		WBGene00019470	0	0	0	0	0	0		WBGene00019470	0	0	0	0	0	0		WBGene00019470	0	0	0	0	0	0			WBGene00018295	35.9727	66.0976	17.5595	41.1453	5.3655	13.5663		WBGene00220084	81.9151	57.8702	40.0572	69.6825	66.3144	62.2383		WBGene00018289
WBGene00202154	0	0	0	0	0	0		WBGene00202154	0	0	0	0	0	0		WBGene00202154	0	0	0	0	0	0		WBGene00202154	0	0	0	0	0	0			WBGene00017880	17.9864	35.2521	14.8581	13.0293	20.5678	22.6105		WBGene00004256	1047.83	1141.97	1079.19	926.939	862.088	788.71		WBGene00044554
WBGene00019469	0	0	0	0	0	0		WBGene00019469	0	0	0	0	0	0		WBGene00019469	4	0	0	0	0	0		WBGene00019469	0	0	0	0	0	0			WBGene00017881	2855.84	3312.59	1465.55	1354.36	1838.58	2304.46		WBGene00044958	210.476	111.111	287.469	180.688	162.102	223.199		WBGene00018286
WBGene00020386	44	127	9	117	117	92		WBGene00020386	52	76	167	117	117	92		WBGene00020386	104	102	38	117	117	92		WBGene00020386	113	39	13	117	117	92			WBGene00022538	288.781	464.886	486.264	365.507	631.341	763.33		WBGene00022842	19.3411	7.71602	9.42522	11.3437	15.7892	8.58459		WBGene00018290
WBGene00235198	0	0	0	0	0	0		WBGene00235198	0	0	0	0	0	0		WBGene00235198	0	0	0	0	0	0		WBGene00235198	0	0	0	0	0	0			WBGene00000541	145.889	170.752	141.827	137.837	212.832	218.869		WBGene00018481	1205.97	504.628	564.335	322.484	204.206	262.903		WBGene00018285
WBGene00006274	0	0	0	1	0	1		WBGene00006274	1	1	1	1	0	1		WBGene00006274	0	2	0	1	0	1		WBGene00006274	3	0	0	1	0	1			WBGene00022541	16.9871	47.3699	17.5595	101.492	78.694	75.0668		WBGene00018482	827.115	985.336	815.282	1842.53	1408.39	1315.59		WBGene00018291
WBGene00015040	1	2	6	16	6	11		WBGene00015040	6	10	10	16	6	11		WBGene00015040	1	7	7	16	6	11		WBGene00015040	9	8	1	16	6	11			WBGene00022542	93.9288	74.9106	21.6117	32.9162	48.2895	25.3237		WBGene00018483	342.45	685.183	221.493	1206.48	1064.19	802.66		WBGene00001694
WBGene00194988	0	0	0	0	0	0		WBGene00194988	0	0	0	0	0	0		WBGene00194988	0	0	0	0	0	0		WBGene00194988	0	0	0	0	0	0			WBGene00001616	120.908	174.057	62.1337	98.0628	94.7905	90.4419		WBGene00001882	761.127	430.554	182.614	245.509	102.103	217.834		WBGene00018292
WBGene00015041	55	22	15	41	26	32		WBGene00015041	53	47	52	41	26	32		WBGene00015041	38	44	27	41	26	32		WBGene00015041	31	49	2	41	26	32			WBGene00022549	233.823	258.882	52.6786	62.4036	93.8963	84.111		WBGene00001881	841.905	902.775	1327.78	454.557	506.305	996.886		WBGene00018284
WBGene00194989	0	0	0	0	0	0		WBGene00194989	1	0	0	0	0	0		WBGene00194989	0	1	0	0	0	0		WBGene00194989	0	0	0	0	0	0			WBGene00022548	49.9621	61.6911	24.3132	29.4874	14.308	13.5663		WBGene00001880	2326.62	1013.11	870.655	640.917	761.037	1124.58		WBGene00194909
WBGene00174624	0	0	0	0	0	0		WBGene00174624	0	0	0	0	0	0		WBGene00174624	0	0	0	0	0	0		WBGene00174624	0	0	0	0	0	0			WBGene00022547	21.9833	27.5407	4.0522	12.3436	11.6253	3.61768		WBGene00001879	1814.65	1760.02	2196.08	1145.71	861.035	1714.77		WBGene00018293
WBGene00015042	8	2	2	0	3	0		WBGene00015042	0	10	1	0	3	0		WBGene00015042	10	0	1	0	3	0		WBGene00015042	7	14	1	0	3	0			WBGene00022545	27.9788	17.626	0	14.4008	7.154	9.94861		WBGene00017798	12.5148	87.1911	122.528	86.6979	308.415	298.315		WBGene00018294
WBGene00194990	0	0	0	0	0	0		WBGene00194990	0	0	0	0	0	0		WBGene00194990	0	0	0	0	0	0		WBGene00194990	0	0	0	0	0	0			WBGene00015223	27.9788	31.9472	5.40293	14.4008	14.308	6.33094		WBGene00003816	21.6165	155.092	517.209	306.279	1072.61	1092.39		WBGene00018295
WBGene00015043	180	77	166	246	117	69		WBGene00015043	187	334	98	246	117	69		WBGene00015043	112	98	117	246	117	69		WBGene00015043	65	119	60	246	117	69			WBGene00015227	28.978	35.2521	28.3654	26.0587	17.885	10.853		WBGene00000054	42.0952	70.9874	84.827	57.5285	63.1566	83.6998		WBGene00017880
WBGene00201444	0	3	0	0	0	0		WBGene00201444	1	4	0	0	0	0		WBGene00201444	2	1	0	0	0	0		WBGene00201444	0	0	0	0	0	0			WBGene00015225	21.9833	13.2195	10.8059	13.7151	4.47125	7.23535		WBGene00000055	182.033	193.672	222.671	76.1646	131.576	141.646		WBGene00017881
WBGene00022895	0	0	0	0	0	0		WBGene00022895	0	0	0	0	0	0		WBGene00022895	0	0	0	0	0	0		WBGene00022895	0	0	0	0	0	0			WBGene00015220	21.9833	28.6423	172.894	82.9763	109.099	89.5375		WBGene00017799	3991.08	1750.77	638.559	763.266	858.93	679.256		WBGene00022538
WBGene00015044	449	622	63	732	164	346		WBGene00015044	841	525	1620	732	164	346		WBGene00015044	753	1645	319	732	164	346		WBGene00015044	364	484	54	732	164	346			WBGene00015219	326.752	307.354	213.416	322.99	237.871	271.326		WBGene00017800	1174.12	891.201	647.984	1847.4	1241.03	971.132		WBGene00000541
WBGene00194991	0	0	0	0	0	0		WBGene00194991	3	0	1	0	0	0		WBGene00194991	0	2	1	0	0	0		WBGene00194991	0	1	0	0	0	0			WBGene00015218	19.9849	124.484	22.9625	42.5168	119.83	264.995		WBGene00017797	701.967	588.732	360.515	961.78	793.668	713.594		WBGene00022541
WBGene00015045	13	14	6	28	8	5		WBGene00015045	20	19	108	28	8	5		WBGene00015045	10	19	13	28	8	5		WBGene00015045	16	13	5	28	8	5			WBGene00006342	161.877	225.833	690.225	414.881	508.828	606.865		WBGene00017796	65.9871	56.327	48.3043	75.3543	52.6305	39.7037		WBGene00022542
WBGene00165500	0	0	0	0	0	0		WBGene00165500	0	0	0	0	0	0		WBGene00165500	0	0	0	0	0	0		WBGene00165500	0	0	0	0	0	0			WBGene00006467	203.846	296.338	132.372	118.635	170.802	178.171		WBGene00015670	700.829	309.412	147.269	154.76	83.1562	85.8459		WBGene00001616
WBGene00006141	1	0	0	2	1	0		WBGene00006141	0	0	0	2	1	0		WBGene00006141	2	1	2	2	1	0		WBGene00006141	0	0	0	2	1	0			WBGene00015276	26.9796	16.5244	0	9.60056	13.4138	17.184		WBGene00015671	377.719	438.27	281.579	619.85	863.14	627.748		WBGene00022549
WBGene00006142	2	12	0	0	6	1		WBGene00006142	3	1	2	0	6	1		WBGene00006142	1	2	0	0	6	1		WBGene00006142	3	3	0	0	6	1			WBGene00004457	245.814	286.423	256.639	390.194	296.891	466.68		WBGene00007055	1270.82	992.28	2041.74	1148.95	588.409	936.794		WBGene00022548
WBGene00015046	314	330	58	32	111	137		WBGene00015046	14	76	108	32	111	137		WBGene00015046	101	74	1	32	111	137		WBGene00015046	238	61	5	32	111	137			WBGene00017190	43.9667	37.4553	25.6639	21.2584	5.3655	15.3751		WBGene00018288	45.5084	17.7469	32.9883	21.0668	11.5787	18.2423		WBGene00022547
WBGene00003769	645	635	67	386	248	414		WBGene00003769	253	231	518	386	248	414		WBGene00003769	450	488	45	386	248	414		WBGene00003769	531	286	23	386	248	414			WBGene00001891	190.855	532.086	771.269	152.237	310.305	475.725		WBGene00018289	14.7902	14.6604	107.212	3.24104	19.9996	67.6037		WBGene00022546
WBGene00003768	210	328	17	32	124	149		WBGene00003768	22	102	104	32	124	149		WBGene00003768	210	226	2	32	124	149		WBGene00003768	204	98	2	32	124	149			WBGene00001892	626.525	895.623	1631.69	706.327	846.855	1763.62		WBGene00044554	435.743	75.617	22.3849	121.539	30.5257	4.2923		WBGene00022545
WBGene00003767	252	105	48	87	57	53		WBGene00003767	55	78	34	87	57	53		WBGene00003767	35	33	7	87	57	53		WBGene00003767	70	63	9	87	57	53			WBGene00019448	38.9705	45.1667	21.6117	24.0014	30.4045	57.8828		WBGene00018286	1113.82	795.522	1556.34	1632.68	514.726	670.671		WBGene00015223
WBGene00003766	429	56	84	470	152	43		WBGene00003766	600	429	84	470	152	43		WBGene00003766	54	122	89	470	152	43		WBGene00003766	36	414	50	470	152	43			WBGene00019445	30.9765	36.3537	6.75367	15.0866	3.577	20.8016		WBGene00018290	6020.76	2748.45	721.03	1127.07	885.245	643.845		WBGene00015227
WBGene00003765	1696	481	529	767	435	209		WBGene00003765	1688	1311	286	767	435	209		WBGene00003765	591	593	223	767	435	209		WBGene00003765	352	818	351	767	435	209			WBGene00019444	122.907	157.533	33.7683	89.148	42.0298	30.7503		WBGene00018285	1401.66	1573.3	2174.87	3304.25	2770.47	2893.01		WBGene00015225
WBGene00019567	4	0	0	3	0	0		WBGene00019567	5	3	1	3	0	0		WBGene00019567	3	9	3	3	0	0		WBGene00019567	3	9	0	3	0	0			WBGene00003386	50.9614	46.2683	31.0669	46.6313	41.1355	42.5077		WBGene00018291	13.6525	19.2901	23.5631	31.6002	24.21	21.4615		WBGene00015220
WBGene00005953	3	1	0	3	1	1		WBGene00005953	12	6	3	3	1	1		WBGene00005953	0	2	0	3	1	1		WBGene00005953	0	4	0	3	1	1			WBGene00019203	3094.65	2424.68	927.954	685.754	618.821	454.923		WBGene00001694	3531.45	6010.78	10564.5	1952.73	7429.32	6529.66		WBGene00015219
WBGene00019568	24	51	11	89	54	45		WBGene00019568	18	71	46	89	54	45		WBGene00019568	57	90	14	89	54	45		WBGene00019568	33	42	0	89	54	45			WBGene00019204	274.792	576.151	401.168	469.742	811.979	802.22		WBGene00018292	1.13771	51.6973	203.82	226.873	1328.39	1072		WBGene00015218
WBGene00019569	12	3	21	59	30	28		WBGene00019569	20	25	5	59	30	28		WBGene00019569	7	7	87	59	30	28		WBGene00019569	7	23	19	59	30	28			WBGene00006760	174.867	414.212	723.993	541.746	1106.19	1106.1		WBGene00018284	43.2329	30.8641	31.8101	24.3078	30.5257	12.8769		WBGene00006342
WBGene00005234	0	1	0	0	2	0		WBGene00005234	0	0	0	0	2	0		WBGene00005234	0	0	0	0	2	0		WBGene00005234	1	1	0	0	2	0			WBGene00020554	165.874	615.809	162.088	231.099	1188.46	1949.93		WBGene00194909	4.55084	4.62961	27.0975	6.48209	10.5261	17.1692		WBGene00006467
WBGene00005233	0	0	0	0	0	0		WBGene00005233	0	0	0	0	0	0		WBGene00005233	0	0	0	0	0	0		WBGene00005233	0	0	0	0	0	0			WBGene00001526	360.727	495.732	2270.58	1535.4	1644.53	1853.16		WBGene00018293	329.936	470.677	579.651	74.544	241.048	330.507		WBGene00015276
WBGene00005230	0	0	0	0	0	0		WBGene00005230	0	0	0	0	0	0		WBGene00005230	0	1	0	0	0	0		WBGene00005230	0	0	0	0	0	0			WBGene00198276	17.9864	8.81301	13.5073	22.6299	16.0965	26.2282		WBGene00018294	1053.52	1172.84	1767.23	2937.2	1870.49	2004.5		WBGene00004457
WBGene00006107	0	0	0	0	0	0		WBGene00006107	0	0	0	0	0	0		WBGene00006107	0	0	0	0	0	0		WBGene00006107	0	0	0	0	0	0			WBGene00201014	6.9947	7.71139	2.70147	13.7151	8.9425	15.3751		WBGene00018295	50.0592	34.7221	51.8387	48.6157	6.31566	16.0961		WBGene00017190
WBGene00005232	0	1	1	0	0	0		WBGene00005232	0	3	0	0	0	0		WBGene00005232	1	2	0	0	0	0		WBGene00005232	0	2	0	0	0	0			WBGene00020553	319.758	483.614	2574.5	1267.96	1207.24	1135.05		WBGene00017880	23.8919	11.574	22.3849	15.395	24.21	26.8269		WBGene00001891
WBGene00005836	5	8	1	4	5	4		WBGene00005836	11	8	2	4	5	4		WBGene00005836	7	5	5	4	5	4		WBGene00005836	0	4	0	4	5	4			WBGene00003634	103.921	166.346	62.1337	46.6313	42.0298	37.0812		WBGene00017881	4293.71	2199.07	4293.19	1600.27	2164.17	2734.19		WBGene00001892
WBGene00019566	3	2	0	0	1	0		WBGene00019566	0	0	0	0	1	0		WBGene00019566	1	3	0	0	1	0		WBGene00019566	2	0	0	0	1	0			WBGene00019114	21.9833	23.1342	12.1566	16.4581	3.577	9.94861		WBGene00022538	150.178	256.944	878.902	431.869	743.143	905.675		WBGene00019448
WBGene00269424	1	1	0	0	0	0		WBGene00269424	0	4	1	0	0	0		WBGene00269424	0	2	1	0	0	0		WBGene00269424	1	3	0	0	0	0			WBGene00019115	89.9318	111.264	35.1191	23.3156	30.4045	20.8016		WBGene00000541	179.758	304.783	276.866	162.862	250.521	259.684		WBGene00019445
WBGene00019565	172	254	96	72	303	435		WBGene00019565	202	287	20	72	303	435		WBGene00019565	248	135	91	72	303	435		WBGene00019565	235	248	61	72	303	435			WBGene00019116	437.668	588.269	131.021	161.838	133.243	123.905		WBGene00022541	26.1673	63.2714	67.1547	119.919	92.6297	89.0652		WBGene00019444
WBGene00019564	46	86	16	15	17	24		WBGene00019564	101	76	50	15	17	24		WBGene00019564	76	81	22	15	17	24		WBGene00019564	81	94	14	15	17	24			WBGene00019117	220.833	307.354	98.6035	82.2905	81.3768	66.927		WBGene00022542	93.2922	62.4998	37.7009	38.8925	56.8409	30.0461		WBGene00003386
WBGene00016786	44	50	33	11	74	77		WBGene00016786	56	55	13	11	74	77		WBGene00016786	126	33	36	11	74	77		WBGene00016786	84	55	29	11	74	77			WBGene00019113	286.783	204.903	32.4176	56.2318	51.8665	50.6475		WBGene00001616	62.574	145.061	225.027	115.867	111.577	107.307		WBGene00019203
WBGene00016785	20	8	12	7	3	5		WBGene00016785	23	19	18	7	3	5		WBGene00016785	7	13	3	7	3	5		WBGene00016785	9	22	15	7	3	5			WBGene00019112	53.9591	191.683	1.35073	5.48603	24.1448	48.8386		WBGene00022549	285.565	181.327	155.516	73.7338	110.524	99.7959		WBGene00019204
WBGene00269425	8	1	0	0	0	5		WBGene00269425	1	2	0	0	0	5		WBGene00269425	8	2	2	0	0	5		WBGene00269425	0	3	0	0	0	5			WBGene00019111	1759.67	1288.9	414.675	558.204	430.134	261.377		WBGene00022548	89.879	73.3022	40.0572	34.8412	16.8418	16.0961		WBGene00006760
WBGene00077593	54	49	9	9	7	23		WBGene00077593	55	51	38	9	7	23		WBGene00077593	76	47	12	9	7	23		WBGene00077593	25	38	4	9	7	23			WBGene00019109	22.9826	31.9472	5.40293	22.6299	19.6735	29.8458		WBGene00022547	39.8198	23.9197	11.7815	14.5847	13.6839	4.2923		WBGene00020554
WBGene00016788	288	288	56	66	70	155		WBGene00016788	216	180	164	66	70	155		WBGene00016788	323	408	72	66	70	155		WBGene00016788	231	333	42	66	70	155			WBGene00019849	12.9902	41.8618	0	4.11453	1.7885	8.13977		WBGene00022546	35.269	21.6049	47.1261	7.29235	4.21044	8.58459		WBGene00001526
WBGene00016783	26	39	2	17	17	12		WBGene00016783	43	21	18	17	17	12		WBGene00016783	28	33	10	17	17	12		WBGene00016783	25	33	7	17	17	12			WBGene00044617	42.9674	79.3171	6.75367	1.37151	6.25975	26.2282		WBGene00022545	42.0952	5.40122	27.0975	17.0155	8.42088	11.8038		WBGene00198276
WBGene00016782	26	41	118	324	105	210		WBGene00016782	68	51	124	324	105	210		WBGene00016782	8	24	46	324	105	210		WBGene00016782	75	81	26	324	105	210			WBGene00019853	44.9659	26.439	5.40293	5.48603	9.83675	8.13977		WBGene00015223	50.0592	31.6357	82.4707	17.0155	16.8418	7.51152		WBGene00201014
WBGene00016781	559	972	1646	3425	2549	2792		WBGene00016781	920	818	953	3425	2549	2792		WBGene00016781	381	518	722	3425	2549	2792		WBGene00016781	1686	824	378	3425	2549	2792			WBGene00016095	189.856	326.082	195.856	158.409	165.436	196.259		WBGene00015227	42.0952	26.2345	23.5631	30.7899	21.0522	12.8769		WBGene00020553
WBGene00005385	0	0	0	0	0	0		WBGene00005385	0	1	0	0	0	0		WBGene00005385	0	0	0	0	0	0		WBGene00005385	1	0	0	0	0	0			WBGene00016094	178.864	265.492	37.8205	19.2011	35.77	98.5817		WBGene00015225	34.1313	16.9752	22.3849	16.2052	5.26305	8.58459		WBGene00003634
WBGene00269426	0	0	0	0	1	1		WBGene00269426	1	0	1	0	1	1		WBGene00269426	1	1	0	0	1	1		WBGene00269426	2	2	0	0	1	1			WBGene00016093	503.618	252.273	220.17	188.582	87.6365	85.0154		WBGene00015220	27.305	42.4381	137.844	98.0416	128.418	106.234		WBGene00019114
WBGene00016789	4	9	0	6	2	4		WBGene00016789	4	8	6	6	2	4		WBGene00016789	10	12	0	6	2	4		WBGene00016789	4	11	0	6	2	4			WBGene00235313	18.9856	47.3699	4.0522	22.6299	20.5678	9.94861		WBGene00015219	382.27	424.381	435.917	381.633	279.994	321.922		WBGene00019115
WBGene00017035	22	62	8	163	107	129		WBGene00017035	17	56	64	163	107	129		WBGene00017035	73	98	9	163	107	129		WBGene00017035	106	20	2	163	107	129			WBGene00016096	15.9879	18.7277	9.45513	13.7151	3.577	6.33094		WBGene00015218	2.27542	27.7777	248.59	50.2362	141.05	314.411		WBGene00019116
WBGene00023264	4	1	2	4	2	0		WBGene00023264	0	2	4	4	2	0		WBGene00023264	4	1	0	4	2	0		WBGene00023264	1	5	0	4	2	0			WBGene00016097	374.716	313.964	90.4991	146.751	102.839	88.6331		WBGene00006342	195.686	244.598	531.347	490.208	598.935	720.033		WBGene00019117
WBGene00268212	84	38	13	10	20	27		WBGene00268212	64	45	27	10	20	27		WBGene00268212	44	37	11	10	20	27		WBGene00268212	24	38	16	10	20	27			WBGene00023417	1097.17	1104.93	409.272	374.422	353.229	320.164		WBGene00006467	164.968	186.728	340.486	140.175	201.049	211.396		WBGene00019113
WBGene00269427	6	3	3	2	2	4		WBGene00269427	18	5	2	2	2	4		WBGene00269427	7	10	0	2	2	4		WBGene00269427	4	3	4	2	2	4			WBGene00016099	288.781	212.614	94.5513	90.5196	67.963	56.074		WBGene00015276	11.3771	13.1172	21.2068	11.3437	15.7892	20.3884		WBGene00019112
WBGene00269428	7	9	1	2	5	1		WBGene00269428	11	8	3	2	5	1		WBGene00269428	15	6	3	2	5	1		WBGene00269428	5	10	0	2	5	1			WBGene00023431	20.9841	27.5407	6.75367	4.11453	10.731	9.04419		WBGene00004457	300.355	223.765	407.641	461.039	349.467	553.706		WBGene00019111
WBGene00005420	3	1	3	2	3	3		WBGene00005420	3	4	1	2	3	3		WBGene00005420	2	3	0	2	3	3		WBGene00005420	0	2	1	2	3	3			WBGene00016101	683.482	557.423	228.274	298.989	258.438	176.362		WBGene00017190	63.7117	21.6049	24.7412	25.1181	6.31566	18.2423		WBGene00019109
WBGene00017034	2	2	0	3	2	0		WBGene00017034	1	3	0	3	2	0		WBGene00017034	4	6	3	3	2	0		WBGene00017034	7	3	0	3	2	0			WBGene00020862	1116.15	978.245	263.393	519.802	499.886	558.027		WBGene00001891	880.587	463.733	683.329	179.878	365.256	564.437		WBGene00019849
WBGene00005421	0	0	0	1	2	0		WBGene00005421	0	3	0	1	2	0		WBGene00005421	0	12	0	1	2	0		WBGene00005421	0	1	0	1	2	0			WBGene00020863	19.9849	41.8618	5.40293	8.9148	2.68275	12.6619		WBGene00001892	1407.35	1616.51	2875.87	834.569	996.822	2092.49		WBGene00044617
WBGene00169422	0	0	0	0	0	0		WBGene00169422	0	0	0	0	0	0		WBGene00169422	0	0	0	0	0	0		WBGene00169422	0	0	0	0	0	0			WBGene00020864	132.899	215.919	18.9103	107.663	129.666	132.95		WBGene00019448	29.5804	49.3825	47.1261	28.3591	35.7887	68.6767		WBGene00016095
WBGene00018190	0	0	0	0	0	0		WBGene00018190	0	0	1	0	0	0		WBGene00018190	0	0	0	0	0	0		WBGene00018190	0	1	0	0	0	0			WBGene00020865	1313	903.334	345.788	779.702	417.615	440.452		WBGene00019445	40.9575	30.8641	32.9883	17.8257	4.21044	24.6807		WBGene00016094
WBGene00018189	33	56	64	57	33	47		WBGene00018189	22	50	40	57	33	47		WBGene00018189	27	50	48	57	33	47		WBGene00018189	98	37	21	57	33	47			WBGene00020861	34.9735	56.183	20.261	41.1453	28.616	19.8972		WBGene00019444	210.476	117.284	104.856	105.334	49.4727	36.4845		WBGene00016093
WBGene00005624	0	0	0	0	0	0		WBGene00005624	0	0	0	0	0	0		WBGene00005624	0	0	0	0	0	0		WBGene00005624	0	0	0	0	0	0			WBGene00017659	2104.41	1590.75	424.13	2481.74	659.063	1109.72		WBGene00003386	47.7838	40.1233	73.0455	55.0978	48.4201	50.4345		WBGene00235313
WBGene00005623	0	0	0	0	0	0		WBGene00005623	0	2	0	0	0	0		WBGene00005623	0	1	0	0	0	0		WBGene00005623	0	0	0	0	0	0			WBGene00017658	271.794	255.577	78.3425	68.5754	80.4825	167.318		WBGene00019203	4076.41	1838.73	2363.37	810.261	728.406	539.756		WBGene00016097
WBGene00005879	1	3	0	0	3	1		WBGene00005879	2	0	0	0	3	1		WBGene00005879	2	2	0	0	3	1		WBGene00005879	2	7	0	0	3	1			WBGene00017661	23.9818	40.7602	9.45513	15.0866	25.9333	9.04419		WBGene00019204	292.391	449.072	671.547	555.029	955.77	951.817		WBGene00023417
WBGene00194894	189	211	28	105	88	53		WBGene00194894	219	207	71	105	88	53		WBGene00194894	185	193	20	105	88	53		WBGene00194894	60	216	15	105	88	53			WBGene00235330	88.9326	92.5366	24.3132	20.5726	53.655	56.9784		WBGene00006760	310.595	515.43	607.927	640.106	1302.08	1312.37		WBGene00016099
WBGene00005881	0	0	0	0	0	0		WBGene00005881	0	0	0	0	0	0		WBGene00005881	0	0	0	0	0	0		WBGene00005881	0	0	0	0	0	0			WBGene00004119	673.49	405.399	390.362	512.258	250.39	120.288		WBGene00020554	52.3346	239.968	1685.94	273.058	1398.92	2313.55		WBGene00023431
WBGene00005880	0	0	0	0	0	0		WBGene00005880	0	0	0	0	0	0		WBGene00005880	0	0	0	0	0	0		WBGene00005880	0	0	0	0	0	0			WBGene00017657	917.305	2019.28	1036.01	1390.02	1897.6	1468.78		WBGene00001526	579.094	722.22	1241.77	1814.17	1935.75	2198.73		WBGene00016101
WBGene00020239	25	70	40	187	328	166		WBGene00020239	16	72	21	187	328	166		WBGene00020239	49	44	1	187	328	166		WBGene00020239	199	62	3	187	328	166			WBGene00195086	37.9712	36.3537	6.75367	5.48603	18.7793	4.5221		WBGene00198276	7.96396	6.17282	25.9194	26.7386	18.947	31.1192		WBGene00020862
WBGene00201049	0	0	0	0	0	0		WBGene00201049	0	0	0	0	0	0		WBGene00201049	0	0	0	0	0	0		WBGene00201049	0	0	0	0	0	0			WBGene00017660	332.748	138.805	41.8727	117.264	118.041	179.075		WBGene00201014	3.41313	10.0308	4.71261	16.2052	10.5261	18.2423		WBGene00020863
WBGene00199418	0	4	0	0	0	0		WBGene00199418	0	0	0	0	0	0		WBGene00199418	0	0	0	0	0	0		WBGene00199418	0	0	0	0	0	0			WBGene00017654	25.9803	28.6423	4.0522	15.7723	6.25975	16.2795		WBGene00020553	405.024	744.596	818.816	1498.17	1421.02	1346.71		WBGene00020864
WBGene00020240	18	61	28	159	269	122		WBGene00020240	8	53	32	159	269	122		WBGene00020240	37	35	2	159	269	122		WBGene00020240	143	42	2	159	269	122			WBGene00017653	150.886	133.297	43.2235	65.8324	51.8665	47.9342		WBGene00003634	109.22	111.111	134.309	55.0978	49.4727	43.996		WBGene00020865
WBGene00020241	19	38	11	174	260	175		WBGene00020241	8	30	21	174	260	175		WBGene00020241	29	26	6	174	260	175		WBGene00020241	130	32	3	174	260	175			WBGene00015053	16.9871	34.1504	22.9625	22.6299	40.2413	45.221		WBGene00019114	43.2329	25.4629	21.2068	19.4463	4.21044	11.8038		WBGene00020861
WBGene00020242	25	20	8	203	51	112		WBGene00020242	2	32	22	203	51	112		WBGene00020242	45	120	9	203	51	112		WBGene00020242	66	16	0	203	51	112			WBGene00015055	76.9417	59.4878	136.424	211.898	207.466	158.273		WBGene00019115	124.01	91.8207	87.1833	27.5489	35.7887	24.6807		WBGene00017659
WBGene00020243	2	0	4	5	34	32		WBGene00020243	1	1	0	5	34	32		WBGene00020243	0	1	0	5	34	32		WBGene00020243	14	2	0	5	34	32			WBGene00006418	58.9553	53.9797	175.595	219.441	108.204	149.229		WBGene00019116	730.409	387.344	511.318	191.222	156.839	147.011		WBGene00017658
WBGene00198140	0	0	0	0	0	0		WBGene00198140	0	0	0	0	0	0		WBGene00198140	0	0	0	0	0	0		WBGene00198140	0	0	0	0	0	0			WBGene00015056	781.408	383.366	767.217	447.797	374.691	160.987		WBGene00019117	288.978	162.036	114.281	97.2313	95.7875	79.4075		WBGene00017661
WBGene00020244	2	8	0	3	4	1		WBGene00020244	14	2	9	3	4	1		WBGene00020244	11	20	5	3	4	1		WBGene00020244	6	1	0	3	4	1			WBGene00000717	463.649	2884.06	1372.35	1766.5	12295.9	13563.6		WBGene00019113	171.794	77.1602	137.844	66.4414	61.0514	60.0922		WBGene00235330
WBGene00197368	0	0	0	0	0	0		WBGene00197368	3	0	0	0	0	0		WBGene00197368	0	0	0	0	0	0		WBGene00197368	0	0	0	0	0	0			WBGene00000718	349.735	2170.2	1142.72	905.196	10704.2	8505.16		WBGene00019112	11.3771	33.1789	129.597	6.48209	28.4205	57.946		WBGene00004119
WBGene00020238	19	15	3	7	10	3		WBGene00020238	3	8	14	7	10	3		WBGene00020238	19	31	1	7	10	3		WBGene00020238	10	10	0	7	10	3			WBGene00000599	263.8	1963.1	1073.83	890.795	7362.36	8928.43		WBGene00019111	1448.3	1214.5	721.03	659.553	506.305	310.118		WBGene00017657
WBGene00196382	0	0	0	0	0	0		WBGene00196382	0	0	0	0	0	0		WBGene00196382	0	0	0	0	0	0		WBGene00196382	0	0	0	0	0	0			WBGene00044582	42.9674	67.1992	17.5595	21.2584	10.731	21.7061		WBGene00019109	28.4427	32.4073	23.5631	26.7386	23.1574	35.4114		WBGene00195086
WBGene00020237	391	749	800	1788	2100	1718		WBGene00020237	405	645	577	1788	2100	1718		WBGene00020237	499	458	229	1788	2100	1718		WBGene00020237	806	391	68	1788	2100	1718			WBGene00015057	244.814	347.012	214.767	690.554	266.487	364.481		WBGene00044617	3.41313	12.3456	76.5799	1.62052	7.36827	31.1192		WBGene00017660
WBGene00003647	106	102	60	149	87	120		WBGene00003647	128	167	211	149	87	120		WBGene00003647	130	217	105	149	87	120		WBGene00003647	160	89	38	149	87	120			WBGene00016045	897.32	742.496	2217.9	1099.26	847.749	686.454		WBGene00019853	15.9279	10.0308	21.2068	6.48209	11.5787	9.65767		WBGene00017654
WBGene00020236	17	10	1	28	6	10		WBGene00020236	15	9	12	28	6	10		WBGene00020236	21	18	2	28	6	10		WBGene00020236	15	11	3	28	6	10			WBGene00004216	487.63	1340.68	99.9543	128.236	479.318	880		WBGene00016095	172.932	208.333	286.291	187.17	194.733	232.857		WBGene00017653
WBGene00044528	11	2	0	7	1	6		WBGene00044528	10	8	7	7	1	6		WBGene00044528	6	3	6	7	1	6		WBGene00044528	2	12	0	7	1	6			WBGene00016044	100.924	131.094	36.4698	62.4036	40.2413	75.0668		WBGene00016094	37.5444	46.2961	301.607	22.6873	42.1044	116.965		WBGene00015053
WBGene00021554	125	185	1772	1160	1226	982		WBGene00021554	294	531	528	1160	1226	982		WBGene00021554	137	129	1741	1160	1226	982		WBGene00021554	1324	454	738	1160	1226	982			WBGene00016046	295.776	442.854	135.073	171.439	104.627	197.163		WBGene00016093	580.232	317.129	419.422	222.822	103.156	100.869		WBGene00015055
WBGene00021558	56	127	185	198	225	344		WBGene00021558	62	149	274	198	225	344		WBGene00021558	139	171	148	198	225	344		WBGene00021558	570	116	67	198	225	344			WBGene00000215	1600.79	3819.34	17673	10456.4	19571.6	18953		WBGene00235313	26.1673	32.4073	35.3446	26.7386	24.21	11.8038		WBGene00006418
WBGene00196458	0	0	0	0	1	0		WBGene00196458	0	0	1	0	1	0		WBGene00196458	0	0	0	0	1	0		WBGene00196458	0	0	0	0	1	0			WBGene00002132	123.906	134.398	133.723	181.725	146.657	161.891		WBGene00016096	19.3411	15.432	12.9597	16.2052	4.21044	7.51152		WBGene00015056
WBGene00021557	0	0	2	0	0	2		WBGene00021557	1	0	1	0	0	2		WBGene00021557	0	0	2	0	0	2		WBGene00021557	2	3	4	0	0	2			WBGene00007023	330.749	319.472	680.77	583.577	497.203	414.224		WBGene00016097	440.293	189.043	154.338	173.396	121.05	105.161		WBGene00000717
WBGene00196319	0	0	0	0	0	0		WBGene00196319	0	0	0	0	0	0		WBGene00196319	0	0	0	0	0	0		WBGene00196319	0	0	0	0	0	0			WBGene00044077	569.568	528.781	1302.11	1121.89	843.278	747.955		WBGene00023417	1750.93	1011.57	1206.43	442.403	415.781	379.868		WBGene00000718
WBGene00043666	0	0	0	0	0	0		WBGene00043666	0	0	0	0	0	0		WBGene00043666	0	0	0	0	0	0		WBGene00043666	0	0	0	0	0	0			WBGene00001695	257.805	752.411	307.967	469.056	2236.52	2249.29		WBGene00016099	411.851	208.333	230.918	106.954	79.9984	66.5306		WBGene00000599
[truncated: 45,471 more rows]
[truncated: 13 more columns]

## Sheet: Fig 2(A-D)-PCA
Fugure 2 (A-D)		Principal Component Analysis (PCA)
rlog Transformed
[truncated: 16,181 more rows]

## Sheet: Figs 2(E-H), 3(A-D), S2-3_DEGs
Figures 2 (E-L), S2, & S3			Differentially Expressed Genes
[truncated: 16,181 more rows]

[truncated: 2 more sheets: Figs 4-GO, Fig 5-KEGG]
