# Supplementary material for: Transcriptome profiling of neurexin- and neuroligin-deficient Caenorhabditis elegans reveals pathways underlying developmental and behavioral dysfunction
Source: Research Square preprint supplement (doi:10.21203/rs.3.rs-10280322/v1), 2026-07-08
Supplement: Supplementary file 2 [file ff8a15821f4fa99a680f7310.docx]

**Title**: Transcriptome profiling of neurexin- and neuroligin-deficient *Caenorhabditis elegans* reveals pathways underlying developmental and behavioral dysfunction

**Authors:** Omamuyovwi M. Ijomone1,2,3, Victor E. Anadu1,2, Toheeb O. Oyerinde1,2, Olayemi K. Ijomone1,2, David A. Oyeniran1,2, Michael Aschner3

**Supplementary Figures**


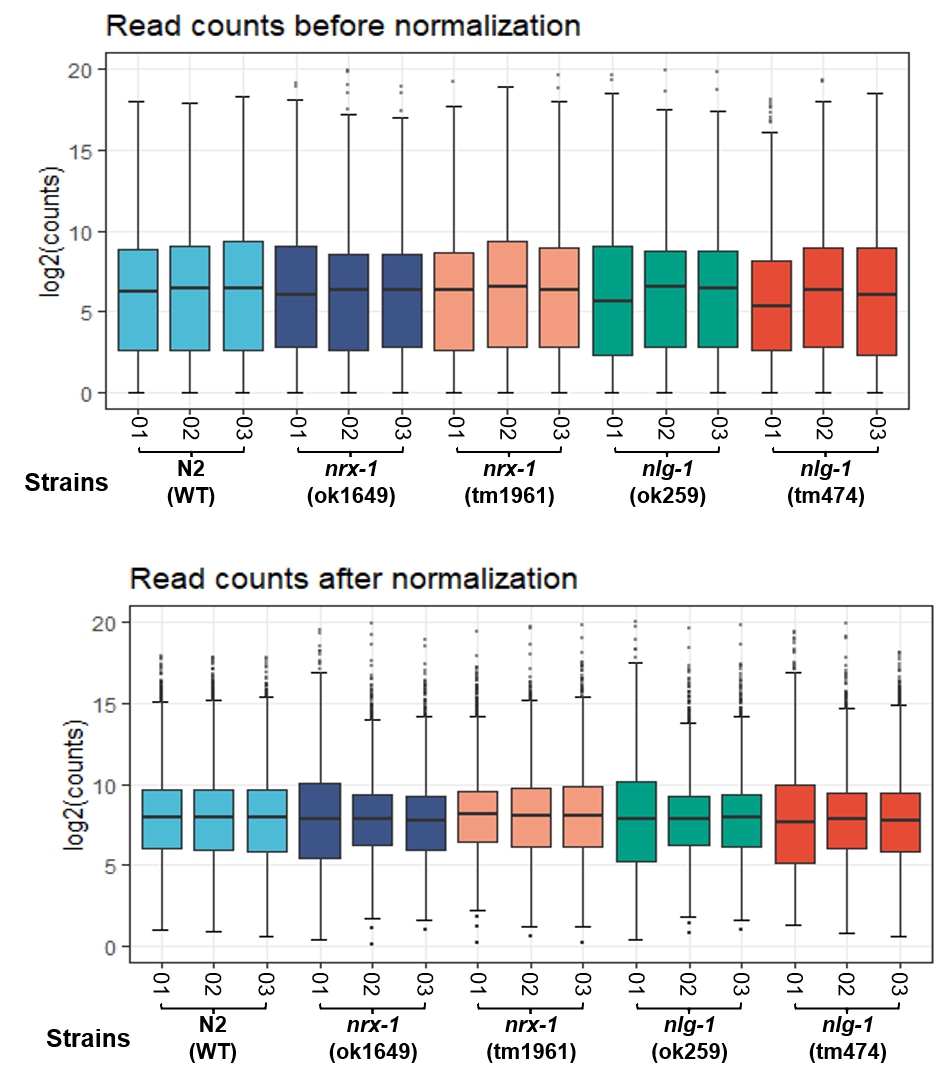


**Supplementary Figure 1:** Distribution of normalized read counts for genes. Boxplot of log2(counts) **A)** before normalization and **B)** after normalization showing gene expression distribution across samples. All worm strains had consistent median expression levels, which indicates effective normalization. Read counts were examined before and after normalization. The original counts were normalized to adjust for factors, including variations in sequencing yield between samples. These normalized read counts were used accurately to determine differentially expressed genes.


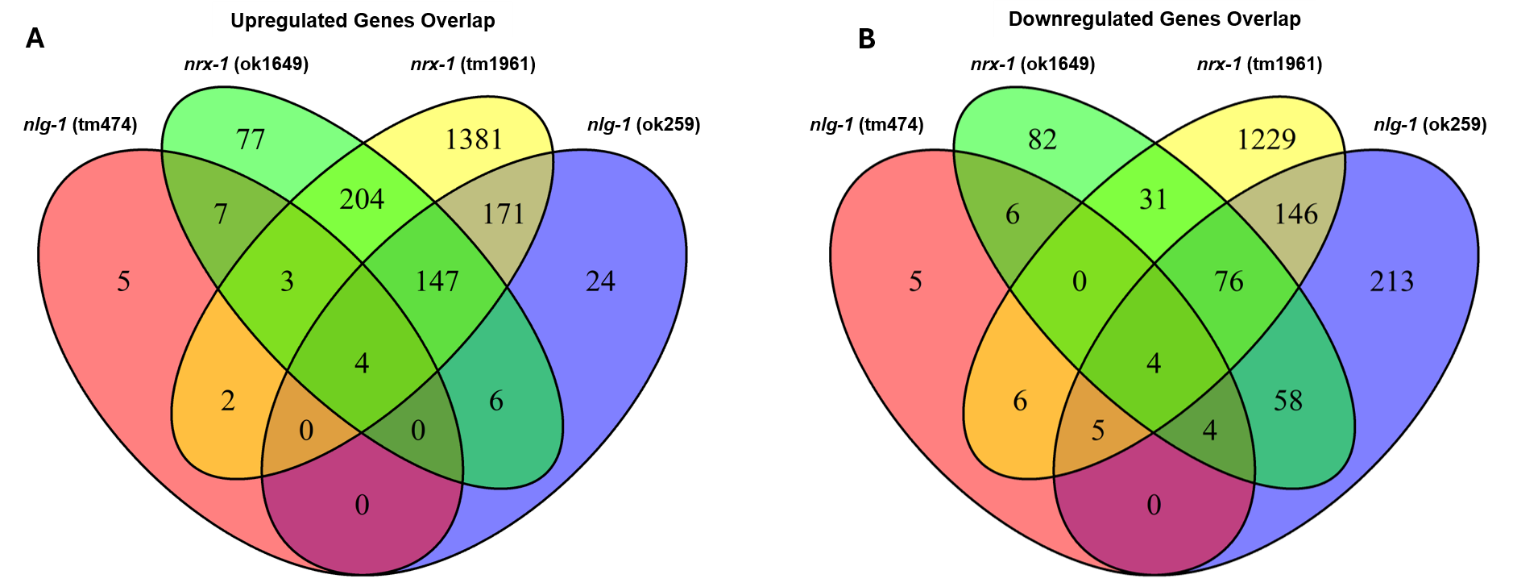


**Supplementary Figure 2:**Venn diagram of upregulated and downregulated genes.


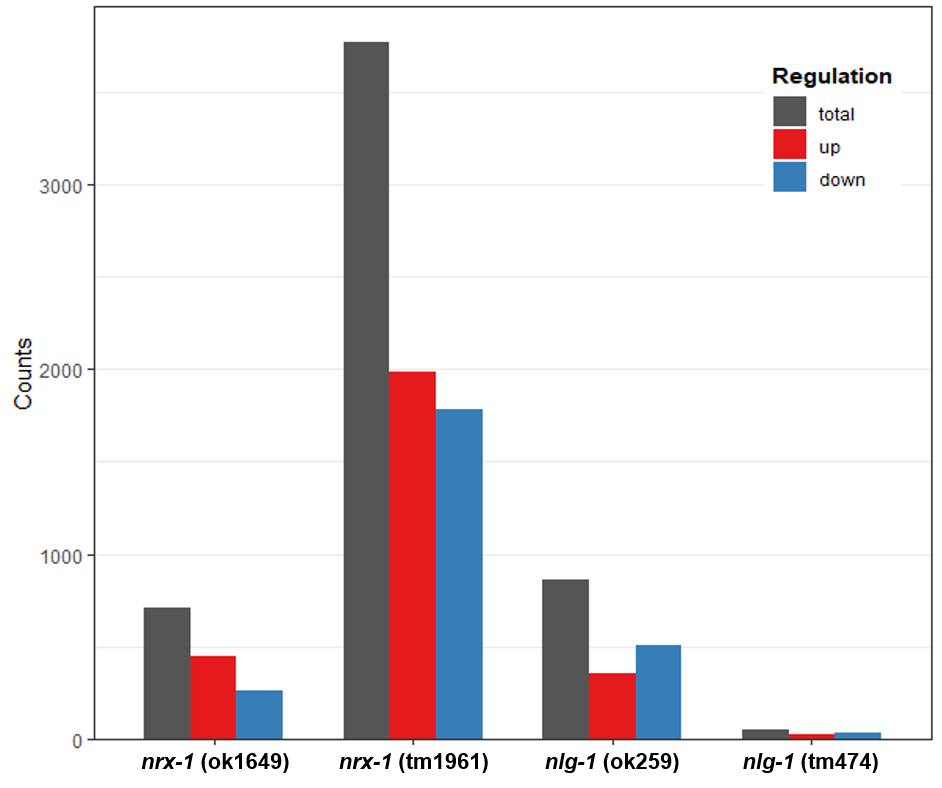


**Supplementary Figure 3:**Histogram of number of DEGs across the four mutant strains. Each bar represents either total (grey), upregulated (red), or downregulated (blue) DEGs across worm strains.


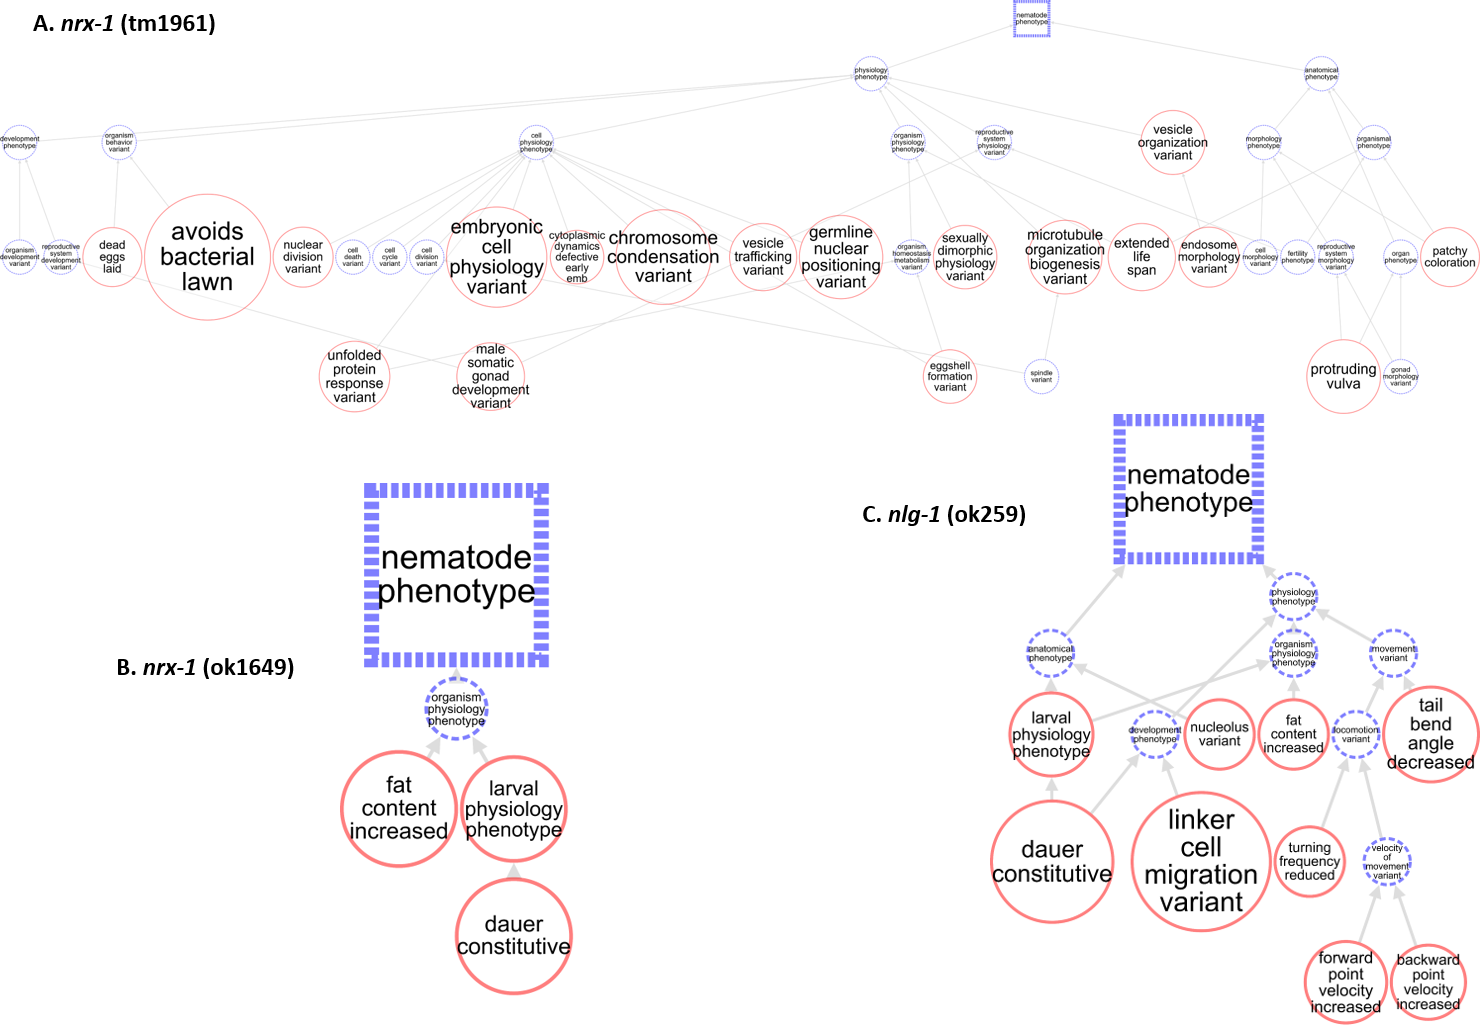


**Supplementary Figure 4**: Phenotype Enrichment Analysis of **A)** Nrx-1 (tm1961), **B)** Nrx-1 (ok1649), and **C)** Nlg-1 (ok259) when compared to wildtype controls.
